# Supplementary material for: Revealing the Protective Role of the TSC1-BRD2-Ferroptosis Axis in Papillary Thyroid Carcinoma: A Multi-Stage Genetic and Functional Integrative Analysis Study
Source: Research Square preprint supplement (doi:10.21203/rs.3.rs-6458091/v1), 2025-05-13
Supplement: Supplementary file 2 [file 26a59689ac36d5fdb97f8eca.xlsx]

## Sheet: Sheet1
Table S6. Mediation Effects and Proportions of Upstream Regulators on Ferroptosis-Related Proteins in PTC
id	id	nsnp.x	method.x	b.x	se.x	or.x	or_lci95.x	or_uci95.x	pvalue.x	nsnp.y	method.y	b.y	se.y	or.y	or_lci95.y	or_uci95.y	pvalue.y	nsnp	method	b	se	or	or_lci95	or_uci95	pvalue	beta_all	beta1	beta2	beta12	beta_dir	lci	uci	beta12_p
10074_128_BRD2_BRD2	TSC1_Q92574_OID30478_v1_Inflammation_II	7	Inverse variance weighted	-0.535904	0.247104	0.58514	0.360513	0.949728	0.0301026	8	Inverse variance weighted	0.310868	0.0661272	1.36461	1.19873	1.55345	2.59e-06	5	Inverse variance weighted	-0.529986	0.139623	0.588613	0.353202	0.980928	0.0419617	-0.535904	0.310868	-0.529986	-0.164756	-0.371148	-0.438418	0.108906	0.307435
10074_128_BRD2_BRD2	KDM3A_Q9Y4C1_OID30426_v1_Inflammation_II	15	Inverse variance weighted	-0.482031	0.205717	0.617528	0.412617	0.9242	0.0191202	18	Inverse variance weighted	0.223636	0.0464261	1.25062	1.14184	1.36975	1.46e-06	5	Inverse variance weighted	-0.529986	0.138492	0.588613	0.353202	0.980928	0.0419617	-0.482031	0.223636	-0.529986	-0.118524	-0.363507	-0.389967	0.15292	0.245884
10074_128_BRD2_BRD2	ITIH4_Q14624_OID30762_v1_Inflammation_II	43	Inverse variance weighted	-0.161842	0.0737425	0.850576	0.736109	0.982842	0.0281859	43	Inverse variance weighted	0.0688398	0.0187753	1.07126	1.03256	1.11142	0.00024588	5	Inverse variance weighted	-0.529986	0.138108	0.588613	0.353202	0.980928	0.0419617	-0.161842	0.0688398	-0.529986	-0.0364842	-0.125358	-0.307176	0.234207	0.225431
10074_128_BRD2_BRD2	LTB_Q06643_OID31383_v1_Oncology_II	65	Inverse variance weighted	0.203691	0.0727948	1.22592	1.06291	1.41392	0.00513951	77	Inverse variance weighted	-0.0821871	0.017323	0.9211	0.89035	0.952911	2.09e-06	5	Inverse variance weighted	-0.529986	0.138109	0.588613	0.353202	0.980928	0.0419617	0.203691	-0.0821871	-0.529986	0.043558	0.160133	-0.227136	0.314252	0.213843
10074_128_BRD2_BRD2	ADAM23_O75077_OID20651_v1_Inflammation	108	Inverse variance weighted	-0.0661019	0.0288822	0.936035	0.884519	0.990552	0.0220985	104	Inverse variance weighted	0.0185305	0.00653982	1.0187	1.00573	1.03185	0.00460431	5	Inverse variance weighted	-0.529986	0.138102	0.588613	0.353202	0.980928	0.0419617	-0.0661019	0.0185305	-0.529986	-0.00982092	-0.056281	-0.280501	0.260859	0.148572
10074_128_BRD2_BRD2	PKD1_P98161_OID30328_v1_Cardiometabolic_II	61	Inverse variance weighted	-0.161238	0.0676922	0.851089	0.74534	0.971843	0.0172221	55	Inverse variance weighted	0.0445266	0.0154569	1.04553	1.01433	1.07769	0.00396792	5	Inverse variance weighted	-0.529986	0.138104	0.588613	0.353202	0.980928	0.0419617	-0.161238	0.0445266	-0.529986	-0.0235985	-0.13764	-0.294281	0.247085	0.146358
10074_128_BRD2_BRD2	CASP4_P49662_OID31276_v1_Oncology_II	7	Inverse variance weighted	-0.496491	0.205301	0.608663	0.407025	0.91019	0.0155906	7	Inverse variance weighted	0.0882831	0.0417123	1.0923	1.00655	1.18535	0.0343045	5	Inverse variance weighted	-0.529986	0.138151	0.588613	0.353202	0.980928	0.0419617	-0.496491	0.0882831	-0.529986	-0.0467888	-0.449702	-0.317565	0.223987	0.094239
10074_128_BRD2_BRD2	CRELD2_Q6UXH1_OID20751_v1_Inflammation	73	Inverse variance weighted	-0.154382	0.0591511	0.856944	0.763136	0.962283	0.00905502	71	Inverse variance weighted	0.0262702	0.0117069	1.02662	1.00333	1.05045	0.0248332	5	Inverse variance weighted	-0.529986	0.138102	0.588613	0.353202	0.980928	0.0419617	-0.154382	0.0262702	-0.529986	-0.0139228	-0.14046	-0.284603	0.256757	0.0901839
10074_128_BRD2_BRD2	ENTPD6_O75354_OID20100_v1_Cardiometabolic	105	Inverse variance weighted	-0.148172	0.0388169	0.862283	0.799113	0.930447	0.000134981	111	Inverse variance weighted	0.0166742	0.00727604	1.01681	1.00242	1.03142	0.021925	5	Inverse variance weighted	-0.529986	0.138102	0.588613	0.353202	0.980928	0.0419617	-0.148172	0.0166742	-0.529986	-0.00883712	-0.139335	-0.279517	0.261843	0.0596411
7049_2_ADAM23_ADAM_23	ERBB4_Q15303_OID21510_v1_Oncology	81	Inverse variance weighted	-0.149598	0.0671358	0.861054	0.754889	0.98215	0.0258613	82	Inverse variance weighted	0.109106	0.0503251	1.11528	1.01052	1.2309	0.0301577	249	Inverse variance weighted	-0.0726879	0.00586514	0.929891	0.879601	0.983056	0.0103942	-0.149598	0.109106	-0.0726879	-0.00793065	-0.141667	-0.0194263	0.00356502	0.0530131
7049_2_ADAM23_ADAM_23	STAB2_Q8WWQ8_OID30401_v1_Cardiometabolic_II	120	Inverse variance weighted	-0.0957426	0.0483882	0.908698	0.826477	0.999099	0.047857	125	Inverse variance weighted	0.0590713	0.0249017	1.06085	1.01032	1.11391	0.0176835	249	Inverse variance weighted	-0.0726879	0.00253284	0.929891	0.879601	0.983056	0.0103942	-0.0957426	0.0590713	-0.0726879	-0.00429377	-0.0914488	-0.00925813	0.0006706	0.044847
7049_2_ADAM23_ADAM_23	DPP6_P42658_OID21354_v1_Oncology	45	Inverse variance weighted	-0.213294	0.0793609	0.807918	0.691535	0.943889	0.00719566	46	Inverse variance weighted	0.0664937	0.0263959	1.06875	1.01487	1.1255	0.0117656	249	Inverse variance weighted	-0.0726879	0.00270779	0.929891	0.879601	0.983056	0.0103942	-0.213294	0.0664937	-0.0726879	-0.00483329	-0.208461	-0.0101405	0.000473969	0.0226602
7049_2_ADAM23_ADAM_23	TSC1_Q92574_OID30478_v1_Inflammation_II	7	Inverse variance weighted	-0.535904	0.247104	0.58514	0.360513	0.949728	0.0301026	8	Inverse variance weighted	0.119692	0.0395547	1.12715	1.04307	1.21801	0.00247821	249	Inverse variance weighted	-0.0726879	0.0051639	0.929891	0.879601	0.983056	0.0103942	-0.535904	0.119692	-0.0726879	-0.00870016	-0.527204	-0.0188214	0.00142108	0.0162346
7049_2_ADAM23_ADAM_23	FLT3LG_P49771_OID20661_v1_Inflammation	86	Inverse variance weighted	-0.161176	0.0798605	0.851142	0.727819	0.995362	0.0435687	88	Inverse variance weighted	0.0274364	0.0132663	1.02782	1.00144	1.05489	0.0386284	249	Inverse variance weighted	-0.0726879	0.0020938	0.929891	0.879601	0.983056	0.0103942	-0.161176	0.0274364	-0.0726879	-0.00199429	-0.159181	-0.00609814	0.00210955	0.0123734
