# Supplementary material for: Revealing the Protective Role of the TSC1-BRD2-Ferroptosis Axis in Papillary Thyroid Carcinoma: A Multi-Stage Genetic and Functional Integrative Analysis Study
Source: Research Square preprint supplement (doi:10.21203/rs.3.rs-6458091/v1), 2025-05-13
Supplement: Supplementary file 3 [file 6d3f56b0cce553260a4a859d.xlsx]

## Sheet: Sheet1
Table S2. Significantly Differentially Expressed Genes Identified by TCGA-THCA and GTEx Analysis
id	ID	Tumor	Normal	log2FC	adj.pval
A2M	ENSG00000175899.14	118.479	220.907	-0.893	8.24e-53
A2M-AS1	ENSG00000245105.2	0.53	1.3	-0.588	5.03e-97
A4GALT	ENSG00000128274.15	8.21	26.5	-1.578	1.94e-98
AAAS	ENSG00000094914.12	27.98	64.319	-1.172	1.88e-164
AADACP1	ENSG00000240602.7	0.14	1.15	-0.915	4.31e-55
AADAT	ENSG00000109576.13	3.145	6.06	-0.768	6.19e-53
AAK1	ENSG00000115977.18	11.05	22.73	-0.978	4.04e-70
AASS	ENSG00000008311.14	2.435	12.87	-2.014	3.80e-209
AATK	ENSG00000181409.11	1.7	6.41	-1.456	1.03e-83
ABC7-42404400C24.1	ENSG00000277758.4	0.3	0.98	-0.607	7.91e-51
ABCA10	ENSG00000154263.17	0.435	11.55	-3.129	2.92e-229
ABCA11P	ENSG00000251595.7	3.55	6.49	-0.719	1.23e-76
ABCA13	ENSG00000179869.14	0.665	2	-0.849	8.90e-35
ABCA3	ENSG00000167972.13	19.1	29.209	-0.588	1.01e-44
ABCA5	ENSG00000154265.15	8.115	20.15	-1.214	1.71e-130
ABCA6	ENSG00000154262.12	0.575	16.05	-3.436	1.46e-243
ABCA7	ENSG00000064687.12	10.395	24.609	-1.168	9.60e-69
ABCA8	ENSG00000141338.13	2.44	25.98	-2.971	3.48e-172
ABCA9	ENSG00000154258.16	0.16	10.96	-3.366	2.90e-281
ABCB1	ENSG00000085563.14	2.27	5.4	-0.969	6.26e-65
ABCB6	ENSG00000115657.12	16.19	41.369	-1.301	4.55e-112
ABCB8	ENSG00000197150.12	18.545	33.049	-0.801	8.60e-110
ABCC1	ENSG00000103222.18	11.445	28.67	-1.253	1.41e-114
ABCC10	ENSG00000124574.14	11.085	20.98	-0.863	1.96e-75
ABCC4	ENSG00000125257.13	1.355	3.07	-0.789	6.06e-42
ABCC5	ENSG00000114770.16	2.965	15.57	-2.063	2.45e-185
ABCC6P1	ENSG00000256340.8	4.365	0.71	1.65	2.61e-163
ABCC6P2	ENSG00000255277.3	5.91	0.7	2.023	3.32e-215
ABCC8	ENSG00000006071.11	1.125	8.99	-2.233	9.93e-55
ABCC9	ENSG00000069431.10	0.97	5.79	-1.785	4.02e-162
ABCD4	ENSG00000119688.20	37.17	71.898	-0.933	1.69e-109
ABCF3	ENSG00000161204.11	35.879	61.72	-0.766	1.24e-130
ABHD11-AS1	ENSG00000225969.1	5.48	1.14	1.598	4.31e-70
ABHD14A	ENSG00000248487.8	62.595	35.409	0.805	1.53e-51
ABHD17B	ENSG00000107362.13	5.5	9.21	-0.652	4.32e-76
ABHD17C	ENSG00000136379.11	15.285	7.62	0.918	1.71e-69
ABI3BP	ENSG00000154175.16	7.915	51.46	-2.557	7.00e-114
ABL1	ENSG00000097007.17	33.051	50.871	-0.607	5.73e-60
ABLIM1	ENSG00000099204.18	34.349	75.598	-1.116	4.61e-83
ABLIM3	ENSG00000173210.19	1.905	12.14	-2.177	4.60e-188
ABO	ENSG00000175164.13	8.31	22.5	-1.336	1.20e-91
ABRACL	ENSG00000146386.7	45.93	26.65	0.763	4.84e-77
ABTB1	ENSG00000114626.17	17.41	44.659	-1.31	6.11e-108
ABTB2	ENSG00000166016.5	5.355	1.87	1.147	3.19e-45
AC000078.5	ENSG00000232926.1	0.13	1.05	-0.859	2.14e-136
AC000089.3	ENSG00000235776.2	3.14	0.57	1.399	3.46e-135
AC000120.7	ENSG00000243107.1	0.13	0.88	-0.734	3.83e-147
AC000123.3	ENSG00000279265.1	1.27	4.14	-1.179	2.01e-138
AC000123.4	ENSG00000224138.1	0.58	2.24	-1.036	1.32e-149
AC001226.7	ENSG00000274898.1	0.155	1.1	-0.863	2.97e-154
AC002059.10	ENSG00000273216.1	0.17	1.1	-0.844	1.03e-117
AC002066.1	ENSG00000237813.3	0.75	2.86	-1.141	5.06e-73
AC002116.8	ENSG00000248101.2	0.3	3.67	-1.845	8.34e-121
AC002117.1	ENSG00000224505.2	0.1	0.68	-0.611	4.76e-68
AC002331.1	ENSG00000236481.1	0.51	0	0.595	1.06e-18
AC002398.12	ENSG00000267328.1	0.325	2.58	-1.434	8.15e-89
AC002398.13	ENSG00000267049.1	1.075	2.25	-0.647	1.27e-41
AC002511.2	ENSG00000233214.1	0	0.74	-0.799	1.10e-84
AC002550.6	ENSG00000276571.1	0.57	1.42	-0.624	6.57e-76
AC003973.3	ENSG00000279377.1	2.49	5.83	-0.969	1.23e-76
AC003991.3	ENSG00000228113.7	0.115	1.1	-0.913	2.65e-64
AC004453.8	ENSG00000146677.7	2.32	4.23	-0.656	5.46e-37
AC004623.3	ENSG00000279488.1	0.19	2.21	-1.432	1.49e-184
AC004893.11	ENSG00000242687.2	3.765	6.35	-0.625	6.84e-74
AC004951.6	ENSG00000228434.1	0.36	1.29	-0.752	1.26e-148
AC005042.4	ENSG00000204380.4	0.6	2.72	-1.217	6.65e-114
AC005077.14	ENSG00000230882.1	0.27	1.06	-0.698	6.11e-41
AC005082.12	ENSG00000226816.2	0.51	1.74	-0.86	1.90e-40
AC005083.1	ENSG00000233834.6	6.93	2.63	1.127	1.08e-44
AC005104.3	ENSG00000223374.1	0.575	5.17	-1.97	9.55e-183
AC005154.6	ENSG00000196295.11	20.865	70.082	-1.701	2.46e-118
AC005154.7	ENSG00000244480.1	0.88	4.6	-1.575	5.53e-154
AC005237.4	ENSG00000225521.1	0.53	1.48	-0.697	9.10e-41
AC005253.2	ENSG00000268030.1	0.74	5.1	-1.81	2.08e-185
AC005255.3	ENSG00000256210.3	2.39	0.68	1.013	1.15e-40
AC005306.3	ENSG00000267283.1	0.715	3.06	-1.243	1.08e-65
AC005329.7	ENSG00000248015.6	0.5	2.62	-1.271	1.25e-134
AC005363.9	ENSG00000255513.1	0	1.32	-1.214	2.02e-60
AC005498.3	ENSG00000267421.6	2.53	1.31	0.612	1.26e-38
AC005517.3	ENSG00000223878.1	0.91	4.72	-1.582	2.36e-136
AC005519.4	ENSG00000258559.2	0.66	6.47	-2.17	7.43e-190
AC005523.2	ENSG00000269604.1	12.925	7.69	0.68	5.91e-83
AC005592.1	ENSG00000236714.1	0.46	1.37	-0.699	9.30e-68
AC005682.5	ENSG00000228649.8	0.24	1.63	-1.085	1.29e-182
AC005740.6	ENSG00000271871.1	0.33	1.23	-0.746	3.82e-117
AC005753.1	ENSG00000278925.1	0.18	0.79	-0.601	4.61e-88
AC005785.2	ENSG00000268189.2	0.19	1.45	-1.042	1.38e-112
AC005785.5	ENSG00000279203.1	0.28	2	-1.229	1.74e-137
AC005786.7	ENSG00000267436.1	2.545	9.98	-1.631	5.27e-51
AC005943.2	ENSG00000267059.2	0.9	0	0.926	1.10e-13
AC006014.7	ENSG00000242073.2	0.21	0.86	-0.62	5.85e-76
AC006014.8	ENSG00000146722.11	0.25	1.28	-0.867	8.14e-135
AC006042.6	ENSG00000227719.1	0.2	0.91	-0.671	6.09e-121
AC006042.8	ENSG00000233264.2	0.1	0.68	-0.611	4.00e-110
AC006077.3	ENSG00000279799.1	1.31	4.41	-1.228	6.72e-91
AC006116.20	ENSG00000267710.5	0.14	0.74	-0.61	1.25e-120
AC006116.24	ENSG00000267776.1	0.75	3.01	-1.196	1.07e-132
AC006116.27	ENSG00000267459.1	1.83	3.79	-0.759	1.34e-39
AC006126.4	ENSG00000267045.1	3.435	13.95	-1.753	2.43e-69
AC006128.2	ENSG00000279716.1	2.43	28.939	-3.126	2.60e-170
AC006272.1	ENSG00000269483.1	0.23	0.88	-0.612	8.89e-69
AC006273.5	ENSG00000267530.2	0.41	2.05	-1.113	2.01e-83
AC006277.2	ENSG00000253392.2	0.19	0.8	-0.597	1.22e-102
AC006277.3	ENSG00000279452.1	0.47	1.74	-0.898	5.76e-115
AC006547.13	ENSG00000236540.7	1.76	5.79	-1.299	5.13e-153
AC006547.14	ENSG00000234409.6	0.25	0.98	-0.664	5.34e-92
AC006942.4	ENSG00000269194.1	2.31	4.15	-0.638	3.45e-43
AC007000.10	ENSG00000225726.1	0.09	0.71	-0.65	1.00e-122
AC007038.7	ENSG00000229127.1	0.26	2.18	-1.336	1.75e-219
AC007191.4	ENSG00000279407.1	0.51	1.27	-0.588	3.04e-85
AC007192.6	ENSG00000269145.2	7.045	2.35	1.264	1.03e-61
AC007204.2	ENSG00000267268.1	0.475	1.86	-0.955	1.39e-29
AC007229.3	ENSG00000267544.1	1.32	0.46	0.668	2.93e-88
AC007246.3	ENSG00000231312.6	7.82	12.78	-0.644	8.41e-61
AC007255.8	ENSG00000223813.2	3.725	0.47	1.685	8.67e-65
AC007283.5	ENSG00000234431.2	4.375	1.41	1.157	2.88e-48
AC007292.6	ENSG00000267980.1	0.895	4.48	-1.532	7.13e-148
AC007319.1	ENSG00000224063.5	0.05	0.73	-0.72	5.46e-33
AC007326.1	ENSG00000279560.1	1.13	11.21	-2.519	9.32e-153
AC007383.4	ENSG00000231955.1	0.375	1.25	-0.711	9.10e-34
AC007566.10	ENSG00000244055.1	1.115	6.15	-1.757	5.18e-163
AC007743.1	ENSG00000233251.7	0.73	5.64	-1.94	1.45e-211
AC007952.5	ENSG00000228157.4	0.35	1.77	-1.037	5.10e-115
AC007969.5	ENSG00000233762.3	3.045	5.54	-0.693	1.39e-44
AC008132.15	ENSG00000182824.7	0.63	0.04	0.648	5.06e-60
AC008746.12	ENSG00000267838.2	1.02	4.12	-1.342	2.34e-95
AC008746.5	ENSG00000235681.1	0.665	3.47	-1.425	3.85e-74
AC008993.2	ENSG00000282542.1	0.295	1.82	-1.123	3.55e-162
AC009005.2	ENSG00000267751.5	2.03	0.82	0.735	1.73e-78
AC009065.4	ENSG00000279473.1	2.91	0	1.967	2.96e-136
AC009120.3	ENSG00000239763.2	0.61	3.83	-1.585	1.33e-169
AC009120.5	ENSG00000260884.1	0.43	2.36	-1.232	1.66e-147
AC009120.6	ENSG00000259972.2	5.575	28.21	-2.151	1.05e-164
AC009133.21	ENSG00000275857.1	1.025	5.16	-1.605	1.49e-69
AC009166.7	ENSG00000280344.1	0.16	1.22	-0.936	2.55e-162
AC009237.11	ENSG00000236431.1	1.285	5.55	-1.519	1.36e-114
AC009237.16	ENSG00000236750.1	0.1	0.72	-0.645	3.35e-51
AC009237.17	ENSG00000235959.1	1.535	6.19	-1.504	1.73e-53
AC009237.8	ENSG00000229689.3	1.92	6	-1.261	4.63e-120
AC009238.7	ENSG00000227120.1	1.535	6.2	-1.506	1.10e-54
AC009404.2	ENSG00000236255.1	0.47	1.98	-1.019	7.15e-141
AC009501.4	ENSG00000231609.5	0.34	1.49	-0.894	2.60e-142
AC009948.5	ENSG00000223960.6	4.715	12.59	-1.25	9.42e-160
AC009950.2	ENSG00000225963.7	0.38	1.43	-0.816	8.30e-103
AC010136.2	ENSG00000223923.1	0.59	2.13	-0.977	7.58e-96
AC010168.1	ENSG00000281457.1	15.765	34.52	-1.083	6.98e-20
AC010226.4	ENSG00000249249.1	1.13	3.26	-1	9.71e-99
AC010547.9	ENSG00000261611.5	0.37	1.31	-0.754	3.05e-118
AC010733.5	ENSG00000232713.2	0.815	1.79	-0.62	1.04e-53
AC010761.13	ENSG00000265205.1	0.165	0.78	-0.612	5.70e-74
AC010761.8	ENSG00000264577.1	0.6	2.38	-1.079	4.56e-138
AC010761.9	ENSG00000265474.1	0.56	4.4	-1.791	4.79e-137
AC010883.5	ENSG00000234936.1	0.82	5.32	-1.796	4.75e-181
AC010976.2	ENSG00000231731.7	0.43	3.49	-1.651	8.47e-188
AC010980.2	ENSG00000237732.9	0.21	3.69	-1.955	6.07e-144
AC011290.5	ENSG00000236015.1	0.55	3.12	-1.41	4.79e-156
AC011298.2	ENSG00000219159.4	0.02	1.37	-1.216	7.93e-96
AC011737.2	ENSG00000204196.5	35.2	16.48	1.05	2.52e-65
AC012065.1	ENSG00000279307.1	1.3	0.38	0.737	2.74e-80
AC012074.2	ENSG00000235072.2	0.26	1.17	-0.784	1.43e-148
AC012314.8	ENSG00000237017.1	0.11	1.03	-0.871	1.10e-180
AC013271.3	ENSG00000186148.11	1.45	3.17	-0.767	3.86e-12
AC015849.19	ENSG00000270871.1	0.24	1.94	-1.245	3.34e-149
AC016292.3	ENSG00000108958.4	1.79	0.65	0.758	2.05e-41
AC016722.4	ENSG00000228925.1	0.15	1.45	-1.091	3.98e-195
AC016738.4	ENSG00000223947.1	0.05	1.02	-0.944	3.32e-150
AC016745.3	ENSG00000234997.1	0.18	1.35	-0.994	1.69e-99
AC017116.11	ENSG00000239775.1	0.85	4.72	-1.629	2.94e-131
AC018462.3	ENSG00000242735.1	0.11	1.94	-1.405	1.95e-114
AC018738.2	ENSG00000237039.1	1.955	0.66	0.832	2.55e-24
AC018766.4	ENSG00000267896.1	3.17	20.46	-2.364	8.67e-171
AC018766.6	ENSG00000268047.1	0.08	1.19	-1.02	1.71e-165
AC018804.7	ENSG00000213225.7	0.21	1.89	-1.256	2.75e-48
AC018816.3	ENSG00000235978.6	7.18	0.8	2.184	1.10e-145
AC019181.3	ENSG00000224331.2	0.31	1.43	-0.891	4.27e-82
AC022007.5	ENSG00000206567.9	3.55	7.64	-0.925	6.14e-58
AC024560.2	ENSG00000236833.1	0.25	1	-0.678	2.05e-61
AC024560.3	ENSG00000214135.8	5.26	34.741	-2.513	1.16e-207
AC024937.6	ENSG00000231443.2	0.41	2.09	-1.132	6.70e-136
AC025165.8	ENSG00000224713.4	0.05	1.01	-0.937	1.32e-154
AC026150.6	ENSG00000260784.1	0.29	1.17	-0.75	3.95e-83
AC026150.8	ENSG00000260693.1	1.69	5.91	-1.361	1.07e-108
AC026471.6	ENSG00000260740.2	1.65	0.58	0.746	8.42e-73
AC027601.1	ENSG00000260005.6	0.16	1.6	-1.164	5.57e-198
AC034220.3	ENSG00000233006.6	3.93	13.09	-1.515	3.01e-142
AC034243.1	ENSG00000253404.1	0.73	2.21	-0.892	5.11e-17
AC068134.10	ENSG00000251485.1	0.6	3.99	-1.641	6.40e-190
AC068138.1	ENSG00000235070.3	0.47	7.12	-2.466	1.18e-91
AC068491.2	ENSG00000229118.1	0.765	3.11	-1.219	2.93e-58
AC068831.15	ENSG00000259661.1	9.31	16.59	-0.771	5.29e-25
AC069213.1	ENSG00000224769.1	2.355	5.57	-0.97	2.96e-42
AC069282.6	ENSG00000225507.1	2.69	5.53	-0.823	2.15e-82
AC073052.1	ENSG00000228446.2	0.095	0.67	-0.609	1.70e-109
AC073130.3	ENSG00000243243.5	0.215	2.32	-1.45	2.60e-170
AC073343.13	ENSG00000228010.5	0.8	1.76	-0.617	3.50e-52
AC073410.1	ENSG00000236047.1	0.12	0.8	-0.685	1.45e-83
AC073464.7	ENSG00000232502.1	0.11	4.04	-2.183	7.05e-161
AC073850.6	ENSG00000229436.1	0	2.04	-1.604	4.25e-133
AC074117.10	ENSG00000234072.1	2.25	7.63	-1.409	3.98e-160
AC074212.5	ENSG00000259605.3	12.325	27.249	-1.084	4.19e-58
AC074212.6	ENSG00000267395.5	2.21	8.04	-1.494	3.36e-140
AC074289.1	ENSG00000225889.7	0.655	2.12	-0.915	1.02e-69
AC078842.3	ENSG00000228031.2	0.04	1.72	-1.387	3.48e-168
AC078899.3	ENSG00000269274.1	0.08	3	-1.889	1.19e-168
AC079630.2	ENSG00000223914.1	18.36	0.1	4.137	1.93e-183
AC079630.4	ENSG00000225342.2	12.54	1.12	2.675	1.80e-118
AC079781.7	ENSG00000232032.1	0	2.3	-1.722	2.05e-27
AC079807.2	ENSG00000233230.1	1.255	3.56	-1.016	1.64e-139
AC079922.2	ENSG00000231747.1	1.5	0.43	0.806	1.17e-63
AC083843.1	ENSG00000259820.1	0.72	4.78	-1.749	7.17e-173
AC083843.4	ENSG00000279518.1	0.665	2.68	-1.144	5.85e-90
AC084219.3	ENSG00000267163.1	0.18	1.02	-0.776	1.03e-140
AC090044.2	ENSG00000224239.1	0.285	1.89	-1.169	1.98e-87
AC092066.1	ENSG00000279095.1	2.585	4.76	-0.684	8.90e-96
AC092301.3	ENSG00000269148.1	0.11	1.26	-1.026	4.10e-170
AC093110.3	ENSG00000238018.2	0.26	4.98	-2.247	1.90e-207
AC093388.3	ENSG00000233654.1	0.16	0.8	-0.634	9.79e-79
AC093495.4	ENSG00000228242.6	3.1	14.77	-1.943	2.15e-140
AC093609.1	ENSG00000230587.1	0.06	1.98	-1.491	3.90e-225
AC093642.1	ENSG00000280119.1	0.065	1.91	-1.45	3.18e-163
AC093642.3	ENSG00000237940.3	0.75	11.88	-2.88	1.06e-205
AC093642.5	ENSG00000220804.8	2.935	6	-0.831	3.53e-76
AC093673.5	ENSG00000232533.1	7.77	3.87	0.849	4.28e-33
AC093838.4	ENSG00000152117.17	6.605	28.089	-1.935	1.56e-177
AC096669.1	ENSG00000225588.2	0.04	0.75	-0.751	1.28e-39
AC096669.3	ENSG00000224568.1	1.355	3.48	-0.928	1.96e-5
AC098617.1	ENSG00000233766.7	0.68	3.4	-1.389	8.53e-122
AC099668.5	ENSG00000259970.1	0.635	3.67	-1.514	1.83e-87
AC100830.5	ENSG00000264937.1	0	0.82	-0.864	8.15e-38
AC104655.3	ENSG00000226508.1	0.935	0.16	0.738	1.94e-69
AC107081.5	ENSG00000236498.1	0.15	1.04	-0.827	3.10e-132
AC108488.4	ENSG00000242282.6	2.19	7.93	-1.485	2.10e-180
AC109642.1	ENSG00000235997.2	2.395	5.48	-0.933	1.89e-46
AC114730.11	ENSG00000235351.1	0.4	5.92	-2.305	3.99e-182
AC114730.3	ENSG00000224272.2	0.16	1.33	-1.006	6.24e-74
AC116035.1	ENSG00000227260.1	0.13	1.23	-0.981	9.29e-147
AC116366.6	ENSG00000234290.2	0.53	3.26	-1.477	6.75e-198
AC116614.1	ENSG00000235688.2	0.07	1.16	-1.013	8.07e-112
AC129492.1	ENSG00000279152.1	0	1.11	-1.077	3.11e-60
AC131097.4	ENSG00000216921.7	1.94	5.38	-1.118	1.88e-16
AC132008.1	ENSG00000213519.2	0.19	1.34	-0.976	4.36e-83
AC132217.4	ENSG00000240801.1	4.515	23.9	-2.175	2.39e-66
AC137932.4	ENSG00000268218.1	0.225	1.54	-1.052	1.69e-176
AC137934.1	ENSG00000260923.5	2.165	7.85	-1.483	3.57e-62
AC138035.2	ENSG00000238035.8	1.93	15.5	-2.494	1.53e-183
AC139100.4	ENSG00000278000.1	0.44	2.46	-1.265	3.72e-129
AC139887.4	ENSG00000233799.1	0	0.51	-0.595	1.78e-36
AC142472.6	ENSG00000276728.1	1.07	2.88	-0.906	5.83e-123
AC144450.1	ENSG00000228613.1	0	2.8	-1.926	5.19e-133
AC144530.1	ENSG00000234742.1	1.71	0.46	0.892	1.48e-72
AC156455.1	ENSG00000256546.1	0.745	3.41	-1.338	3.69e-129
AC159540.1	ENSG00000230606.10	7.98	31.86	-1.872	2.86e-100
AC159540.2	ENSG00000278766.2	0.13	0.81	-0.68	8.29e-96
AC234582.1	ENSG00000279487.1	1.54	3.56	-0.844	1.95e-6
AC239868.2	ENSG00000280874.1	15.37	4.77	1.504	3.36e-22
AC239868.3	ENSG00000281134.1	15.37	4.77	1.504	3.36e-22
AC241377.2	ENSG00000281741.1	3.515	1.34	0.948	2.47e-35
AC245100.1	ENSG00000280649.1	5.305	1.96	1.091	2.59e-65
ACACB	ENSG00000076555.15	3.8	34.441	-2.884	5.80e-241
ACAD10	ENSG00000111271.14	11.365	22.181	-0.907	4.89e-104
ACAD11	ENSG00000240303.7	7.345	25.141	-1.647	3.78e-161
ACAD8	ENSG00000151498.11	28.391	51.179	-0.828	3.76e-57
ACADL	ENSG00000115361.7	8.89	30.29	-1.662	3.08e-120
ACADS	ENSG00000122971.8	18.035	29.65	-0.687	2.15e-61
ACADSB	ENSG00000196177.12	5.305	9.09	-0.678	6.37e-52
ACADVL	ENSG00000072778.19	371.61	1139.04	-1.613	5.72e-116
ACAP2-IT1	ENSG00000229325.1	0.11	0.7	-0.615	1.25e-119
ACAP3	ENSG00000131584.18	9	47.669	-2.283	6.48e-169
ACBD4	ENSG00000181513.14	19.695	30.689	-0.615	2.57e-65
ACBD7	ENSG00000176244.6	1.685	0.27	1.08	6.31e-79
ACCS	ENSG00000110455.13	10.375	42.42	-1.932	5.31e-142
ACD	ENSG00000102977.13	15.085	25.569	-0.724	9.30e-101
ACE2	ENSG00000130234.10	0.82	2.8	-1.062	6.86e-93
ACHE	ENSG00000087085.13	0.56	2.19	-1.032	3.38e-69
ACIN1	ENSG00000100813.14	74.434	170.78	-1.187	4.44e-125
ACKR1	ENSG00000213088.9	7.145	33.529	-2.084	7.90e-83
ACKR2	ENSG00000144648.14	0.31	2.66	-1.482	1.72e-213
ACKR3	ENSG00000144476.5	15.51	53.09	-1.712	8.29e-103
ACOT11	ENSG00000162390.17	4.085	12.27	-1.384	7.23e-103
ACOT7	ENSG00000097021.19	14.54	6.65	1.022	2.17e-83
ACOT9	ENSG00000123130.16	21.989	33.77	-0.597	1.43e-56
ACOX2	ENSG00000168306.12	26.68	46.24	-0.771	2.99e-46
ACP5	ENSG00000102575.10	25.36	4.88	2.164	1.63e-74
ACRC	ENSG00000147174.11	1.325	2.78	-0.701	5.40e-52
ACSF2	ENSG00000167107.12	42.43	156.834	-1.862	2.12e-142
ACSL1	ENSG00000151726.13	28.849	51.918	-0.826	1.53e-74
ACSM5	ENSG00000183549.10	2.07	5.02	-0.972	8.53e-59
ACSS1	ENSG00000154930.14	15.795	36.549	-1.161	4.87e-130
ACSS2	ENSG00000131069.19	13.525	26.96	-0.945	4.93e-155
ACTA1	ENSG00000143632.14	0.04	3.73	-2.185	8.90e-109
ACTA2	ENSG00000107796.12	108.631	227.495	-1.06	4.52e-36
ACTA2-AS1	ENSG00000180139.11	0.335	5.02	-2.173	1.06e-137
ACTC1	ENSG00000159251.6	0.15	2.72	-1.694	1.61e-99
ACTG1	ENSG00000184009.9	2846.26	1370.99	1.053	8.14e-104
ACTG1P17	ENSG00000259315.1	0.56	1.98	-0.934	2.36e-108
ACTG1P20	ENSG00000241547.1	0.34	1.08	-0.634	3.66e-69
ACTG1P3	ENSG00000215388.3	0.22	1.16	-0.824	7.57e-144
ACTG2	ENSG00000163017.13	2.55	12.74	-1.952	1.91e-76
ACTN2	ENSG00000077522.12	0.05	0.91	-0.863	8.62e-74
ACTR5	ENSG00000101442.9	3.395	6.21	-0.714	2.40e-161
ACVR1	ENSG00000115170.13	51.351	25.12	1.003	4.05e-60
ACVRL1	ENSG00000139567.12	10.095	32.81	-1.608	4.04e-124
ACY1	ENSG00000243989.7	56.265	36.081	0.627	1.15e-66
ACYP1	ENSG00000119640.8	17.085	31.919	-0.864	3.08e-101
AD000092.3	ENSG00000240616.1	0.215	1.02	-0.733	8.69e-135
AD000684.2	ENSG00000268947.1	0.42	3.45	-1.648	7.91e-202
ADA	ENSG00000196839.12	3.785	9.62	-1.15	7.79e-90
ADAL	ENSG00000168803.14	5.41	8.98	-0.639	2.46e-53
ADAM19	ENSG00000135074.15	0.93	3.16	-1.108	3.26e-67
ADAM1A	ENSG00000229186.4	0	0.82	-0.864	4.18e-113
ADAM22	ENSG00000008277.14	0.51	3.12	-1.448	3.01e-162
ADAM23	ENSG00000114948.12	0.135	0.87	-0.72	9.96e-86
ADAM33	ENSG00000149451.17	0.51	24.38	-4.071	5.17e-266
ADAM8	ENSG00000151651.15	2.335	5.38	-0.936	3.59e-47
ADAMTS1	ENSG00000154734.14	9.11	53.619	-2.434	3.14e-116
ADAMTS10	ENSG00000142303.13	4.94	24.17	-2.083	9.15e-110
ADAMTS12	ENSG00000151388.10	0.645	1.47	-0.586	5.30e-31
ADAMTS13	ENSG00000160323.18	1.79	5.71	-1.266	9.96e-132
ADAMTS15	ENSG00000166106.3	3.545	7.08	-0.83	3.53e-37
ADAMTS2	ENSG00000087116.13	1.18	6.45	-1.773	9.20e-88
ADAMTS3	ENSG00000156140.8	0.52	1.37	-0.641	5.57e-84
ADAMTS4	ENSG00000158859.9	1.285	12.53	-2.566	2.66e-100
ADAMTS5	ENSG00000154736.5	1.145	4.69	-1.407	3.08e-103
ADAMTS7	ENSG00000136378.14	1.16	2.42	-0.663	2.07e-38
ADAMTS9-AS1	ENSG00000241158.5	0.27	1.32	-0.869	1.94e-61
ADAMTSL1	ENSG00000178031.15	0.85	1.84	-0.618	1.76e-47
ADAMTSL2	ENSG00000197859.9	5.825	11.77	-0.904	1.04e-33
ADAMTSL4	ENSG00000143382.13	5.165	14.24	-1.306	3.22e-64
ADAT2	ENSG00000189007.15	1.625	10.17	-2.089	5.24e-203
ADAT3	ENSG00000213638.5	1.52	4.72	-1.183	1.89e-109
ADCK5	ENSG00000173137.11	4.425	10.36	-1.066	7.52e-117
ADCY10P1	ENSG00000161912.17	0.97	10.13	-2.498	2.38e-192
ADCY2	ENSG00000078295.15	0.13	0.93	-0.772	2.47e-73
ADCY3	ENSG00000138031.14	9.9	49.21	-2.204	1.17e-152
ADCY4	ENSG00000129467.13	5.56	60.459	-3.228	3.94e-191
ADCY5	ENSG00000173175.14	0.35	1.92	-1.113	3.26e-126
ADCY6	ENSG00000174233.11	12.405	36.61	-1.488	2.99e-136
ADCY8	ENSG00000155897.9	0.73	0	0.791	1.54e-56
ADCY9	ENSG00000162104.9	13.39	21.341	-0.635	3.16e-34
ADCYAP1R1	ENSG00000078549.14	0.3	1.79	-1.102	2.95e-58
ADD3	ENSG00000148700.13	37.29	84.062	-1.152	2.23e-93
ADD3-AS1	ENSG00000203876.9	0.28	1.6	-1.022	1.95e-190
ADGRA2	ENSG00000020181.17	4.64	10.56	-1.035	3.12e-70
ADGRA3	ENSG00000152990.13	8.65	28.281	-1.601	2.16e-123
ADGRB1	ENSG00000181790.10	0.16	1.11	-0.863	1.54e-77
ADGRD1	ENSG00000111452.12	7.825	13.04	-0.67	8.62e-26
ADGRF5	ENSG00000069122.18	19.82	35.14	-0.796	5.66e-24
ADGRG1	ENSG00000205336.11	244.136	157.76	0.627	2.96e-31
ADGRG3	ENSG00000182885.16	0.17	5.22	-2.41	8.30e-191
ADGRG6	ENSG00000112414.14	0.5	1.74	-0.869	6.20e-81
ADGRL2	ENSG00000117114.19	26.96	51.638	-0.913	2.35e-64
ADGRL4	ENSG00000162618.12	12.645	22.721	-0.798	7.40e-37
ADGRV1	ENSG00000164199.15	0.56	10.48	-2.879	7.26e-185
ADH1B	ENSG00000196616.12	0.355	69.821	-5.708	7.66e-279
ADH1C	ENSG00000248144.5	0.08	2.14	-1.54	1.50e-186
ADHFE1	ENSG00000147576.15	5.455	28.22	-2.178	3.06e-198
ADIG	ENSG00000182035.11	0.28	1.07	-0.694	3.00e-11
ADIPOR2	ENSG00000006831.9	21.76	34.279	-0.632	9.78e-51
ADIRF	ENSG00000148671.13	136.054	245.315	-0.846	3.97e-32
ADIRF-AS1	ENSG00000272734.1	3.995	26.119	-2.441	1.78e-144
ADK	ENSG00000156110.13	53.439	21.021	1.306	2.24e-137
ADM2	ENSG00000128165.8	3.075	8.88	-1.278	9.13e-37
ADM5	ENSG00000224420.3	0.35	1.91	-1.108	1.17e-125
ADORA1	ENSG00000163485.15	15.835	2.69	2.19	2.59e-154
ADORA2A	ENSG00000128271.19	1.91	4.06	-0.798	2.57e-59
ADPRHL2	ENSG00000116863.10	35.991	22.841	0.634	2.72e-107
ADRA1D	ENSG00000171873.7	0.08	0.69	-0.646	5.78e-127
ADRA2A	ENSG00000150594.6	0.84	6.47	-2.021	9.27e-120
ADRA2B	ENSG00000274286.1	0.3	1.17	-0.739	1.27e-83
ADRBK1	ENSG00000173020.10	28.41	49.439	-0.778	9.80e-86
ADTRP	ENSG00000111863.12	2.695	0.53	1.272	1.30e-60
AE000661.37	ENSG00000251002.7	2.085	0.03	1.582	2.65e-68
AEBP1	ENSG00000106624.8	40.965	120.617	-1.535	1.09e-59
AF011889.2	ENSG00000238039.1	0.33	4.35	-2.008	3.19e-146
AF127577.10	ENSG00000229047.1	18.19	5.69	1.52	1.98e-60
AF129408.17	ENSG00000272991.1	0.74	2.41	-0.971	3.23e-28
AF131215.8	ENSG00000270076.1	3.89	2.01	0.7	3.22e-37
AF131216.5	ENSG00000255020.1	0.51	5.32	-2.065	1.52e-63
AF186192.1	ENSG00000254533.1	0.81	1.84	-0.65	3.77e-89
AF186192.5	ENSG00000255085.8	2.495	4.95	-0.768	2.38e-45
AF230666.2	ENSG00000223697.3	0.43	2.23	-1.176	7.60e-160
AFAP1L1	ENSG00000157510.13	3.77	10.87	-1.315	4.58e-93
AFAP1L2	ENSG00000169129.14	66.008	102.757	-0.631	4.60e-29
AFG3L1P	ENSG00000223959.8	7.465	31.8	-1.954	1.54e-189
AGA	ENSG00000038002.8	25.21	14.68	0.741	1.74e-44
AGAP10P	ENSG00000230869.1	0.37	1.51	-0.874	3.58e-120
AGAP11	ENSG00000271880.1	0.43	5.79	-2.247	2.25e-195
AGAP2	ENSG00000135439.11	0.85	2.25	-0.813	1.88e-58
AGAP2-AS1	ENSG00000255737.2	1.94	3.6	-0.646	6.92e-52
AGAP3	ENSG00000133612.18	39.129	84.7	-1.095	2.04e-128
AGAP4	ENSG00000188234.13	4.165	20.3	-2.044	8.64e-183
AGAP5	ENSG00000172650.12	1.7	8.02	-1.74	2.65e-186
AGAP6	ENSG00000204149.9	4.9	31.15	-2.446	2.47e-173
AGAP7P	ENSG00000264204.2	0.29	1.56	-0.989	1.16e-78
AGAP9	ENSG00000204172.11	3.05	19.62	-2.348	6.95e-164
AGBL2	ENSG00000165923.15	1	3.52	-1.176	3.49e-110
AGBL3	ENSG00000146856.14	1.555	2.86	-0.595	2.11e-82
AGER	ENSG00000204305.13	20.129	68.171	-1.711	5.28e-60
AGO2	ENSG00000123908.11	3.655	7.58	-0.882	4.68e-106
AGO3	ENSG00000126070.18	2.08	4.48	-0.831	3.17e-123
AGO4	ENSG00000134698.10	3.96	8.2	-0.891	4.86e-101
AGPAT4	ENSG00000026652.13	0.705	4.43	-1.671	8.93e-237
AGPAT9	ENSG00000138678.10	10.3	22.55	-1.059	1.63e-55
AGR2	ENSG00000106541.11	36.319	1.93	3.671	3.56e-142
AGR3	ENSG00000173467.8	0.38	2.59	-1.379	1.23e-47
AGT	ENSG00000135744.7	3.155	10.45	-1.462	3.29e-52
AGTR1	ENSG00000144891.17	0.445	12.09	-3.179	1.61e-190
AHCYL2	ENSG00000158467.16	17.105	34.031	-0.952	1.39e-69
AHDC1	ENSG00000126705.13	13.365	22.201	-0.692	5.76e-56
AHI1	ENSG00000135541.20	7.945	17.31	-1.033	5.51e-109
AHNAK	ENSG00000124942.13	45.879	72.821	-0.655	1.01e-33
AHNAK2	ENSG00000185567.6	12.61	2.48	1.968	1.22e-69
AHRR	ENSG00000063438.16	0.26	0.99	-0.659	7.98e-81
AHSA2	ENSG00000173209.22	19.21	135.748	-2.758	5.80e-162
AIF1	ENSG00000204472.12	26.865	13.44	0.948	8.46e-29
AIF1L	ENSG00000126878.12	35.569	86.858	-1.265	2.86e-56
AIFM2	ENSG00000042286.14	9.565	16.69	-0.744	1.32e-92
AJ011932.1	ENSG00000274248.1	0.17	1.9	-1.31	3.88e-82
AK1	ENSG00000106992.17	314.877	135.307	1.213	4.15e-125
AK7	ENSG00000140057.8	0.88	1.84	-0.595	1.98e-49
AKAP1	ENSG00000121057.12	31.456	48.2	-0.6	6.08e-43
AKAP12	ENSG00000131016.16	5.925	21.591	-1.706	1.02e-100
AKAP17A	ENSG00000197976.10	18.88	72.208	-1.881	9.08e-186
AKAP2	ENSG00000241978.9	17.68	31.26	-0.788	2.21e-42
AKAP8	ENSG00000105127.8	10.655	20.69	-0.896	1.52e-151
AKAP8L	ENSG00000011243.17	36.505	151.733	-2.026	1.14e-186
AKR1C1	ENSG00000187134.12	2.51	51.041	-3.89	7.25e-203
AKR1C2	ENSG00000151632.16	1.335	27.11	-3.59	8.52e-187
AKR1C3	ENSG00000196139.11	5.14	25.539	-2.112	1.96e-119
AKR1E2	ENSG00000165568.17	0.55	3.99	-1.687	3.90e-225
AKR7A3	ENSG00000162482.4	0.38	1.54	-0.88	1.51e-102
AKR7L	ENSG00000211454.13	0.15	0.86	-0.694	7.34e-136
AL136419.6	ENSG00000260669.2	0.95	2.44	-0.819	4.13e-150
AL157871.2	ENSG00000259052.1	22.405	94.039	-2.022	1.61e-62
AL158801.1	ENSG00000279392.1	2.775	0.42	1.411	2.00e-96
AL442127.1	ENSG00000278371.2	0	16.979	-4.168	6.52e-60
AL590762.11	ENSG00000213018.2	0.1	1	-0.862	5.67e-119
ALB	ENSG00000163631.16	0.32	2.2	-1.278	3.03e-78
ALDH16A1	ENSG00000161618.9	15.79	25.09	-0.636	1.70e-57
ALDH1A1	ENSG00000165092.12	76.749	158.924	-1.04	1.26e-40
ALDH1A2	ENSG00000128918.14	0.33	1.5	-0.91	6.00e-112
ALDH1A3	ENSG00000184254.16	8.225	1.59	1.833	1.52e-76
ALDH1L1	ENSG00000144908.13	0.515	2.19	-1.074	2.02e-37
ALDH1L2	ENSG00000136010.13	0.43	2.16	-1.144	3.77e-122
ALDH2	ENSG00000111275.12	58.46	90.089	-0.615	8.79e-26
ALDH3B1	ENSG00000006534.15	17.6	2.88	2.261	1.65e-131
ALDH4A1	ENSG00000159423.16	4.135	8.5	-0.888	1.33e-34
ALDH5A1	ENSG00000112294.12	12.515	7.56	0.659	9.57e-42
ALDOC	ENSG00000109107.13	3.77	8.13	-0.937	2.70e-38
ALG13	ENSG00000101901.10	22.315	38.7	-0.768	9.25e-109
ALKBH6	ENSG00000239382.10	12.32	24.501	-0.937	5.34e-129
ALOX12-AS1	ENSG00000215067.9	4.945	10.01	-0.889	4.87e-113
ALOX12P2	ENSG00000262943.7	3.955	11.13	-1.292	3.25e-67
ALOX15B	ENSG00000179593.15	14.62	1.77	2.495	1.94e-68
ALOX5	ENSG00000012779.10	20.494	7.71	1.303	2.95e-20
ALOX5AP	ENSG00000132965.9	20.485	9.06	1.095	1.17e-21
ALPK1	ENSG00000073331.17	5.905	10.73	-0.764	1.93e-101
ALPK3	ENSG00000136383.6	1.835	4.32	-0.908	1.48e-80
ALS2	ENSG00000003393.14	4.735	8.06	-0.66	8.18e-96
ALS2CL	ENSG00000178038.16	23.085	82.991	-1.802	4.24e-103
ALS2CR12	ENSG00000155749.12	0.55	1.73	-0.817	2.54e-110
AMDHD2	ENSG00000162066.14	15.14	28	-0.845	3.30e-123
AMFR	ENSG00000159461.14	67.775	42.031	0.677	1.75e-88
AMH	ENSG00000104899.5	0.25	1.27	-0.861	8.02e-67
AMIGO2	ENSG00000139211.6	11.65	3.96	1.351	1.92e-62
AMMECR1L	ENSG00000144233.9	6.06	10.35	-0.685	4.13e-99
AMN	ENSG00000166126.10	0.23	2.41	-1.471	3.35e-164
AMOT	ENSG00000126016.13	7.835	3.4	1.006	1.72e-47
AMOTL1	ENSG00000166025.17	6.495	11.33	-0.718	5.33e-61
AMOTL2	ENSG00000114019.14	24.955	38.34	-0.6	8.44e-31
AMPD2	ENSG00000116337.15	15.535	48.06	-1.569	1.76e-149
AMPH	ENSG00000078053.16	0.19	1.54	-1.094	4.16e-135
AMT	ENSG00000145020.14	8.27	46.539	-2.358	8.57e-146
AMY1C	ENSG00000187733.6	11.375	6.68	0.688	1.07e-4
AMY2B	ENSG00000240038.6	11.805	72.298	-2.517	1.20e-138
AMZ2P1	ENSG00000214174.8	4.595	8.58	-0.776	2.31e-89
ANAPC1	ENSG00000153107.11	5.255	8.86	-0.657	4.41e-94
ANAPC2	ENSG00000176248.8	18.28	56.422	-1.574	4.53e-188
ANAPC4	ENSG00000053900.10	11.13	26.8	-1.197	1.08e-167
ANAPC5	ENSG00000089053.12	61.626	104.198	-0.748	2.05e-131
ANAPC7	ENSG00000196510.12	30.05	47.53	-0.644	3.45e-106
ANGEL1	ENSG00000013523.9	7.6	14.67	-0.866	4.28e-88
ANGEL2	ENSG00000174606.12	10.285	17.44	-0.708	1.98e-89
ANGPT1	ENSG00000154188.9	1.375	3.67	-0.976	3.75e-39
ANGPT2	ENSG00000091879.13	3.36	6.81	-0.841	1.14e-28
ANGPT4	ENSG00000101280.7	0.24	1.16	-0.801	2.98e-73
ANGPTL1	ENSG00000116194.12	5.9	28.201	-2.081	6.56e-100
ANGPTL2	ENSG00000136859.9	8	14.94	-0.825	4.29e-39
ANK2	ENSG00000145362.16	1.585	12.17	-2.349	1.71e-152
ANKAR	ENSG00000151687.14	2.08	4.96	-0.952	7.44e-127
ANKDD1A	ENSG00000166839.16	2.295	7.55	-1.376	3.94e-167
ANKHD1	ENSG00000131503.20	37.035	75.331	-1.005	3.84e-132
ANKK1	ENSG00000170209.4	0.12	0.83	-0.708	3.24e-126
ANKRA2	ENSG00000164331.9	16.56	35.351	-1.05	7.52e-111
ANKRD10	ENSG00000088448.14	43.29	116.218	-1.404	9.92e-139
ANKRD10-IT1	ENSG00000229152.2	2.845	15.78	-2.126	2.03e-148
ANKRD13B	ENSG00000198720.12	1.52	7.21	-1.704	5.89e-151
ANKRD13D	ENSG00000172932.14	19.85	40.33	-0.987	2.96e-64
ANKRD18A	ENSG00000180071.18	0.935	4.52	-1.512	4.09e-136
ANKRD18EP	ENSG00000217165.1	1.34	2.57	-0.609	7.20e-59
ANKRD20A1	ENSG00000260691.5	0.14	0.95	-0.774	2.72e-114
ANKRD20A5P	ENSG00000186481.15	1.465	4.21	-1.08	1.83e-47
ANKRD20A8P	ENSG00000229089.6	0.04	1.08	-1	2.48e-134
ANKRD22	ENSG00000152766.5	0.94	0.11	0.806	5.90e-48
ANKRD23	ENSG00000163126.14	1.17	4.8	-1.418	9.62e-147
ANKRD24	ENSG00000089847.12	0.745	2.26	-0.902	2.31e-100
ANKRD26	ENSG00000107890.16	1.93	3.43	-0.596	2.94e-107
ANKRD29	ENSG00000154065.16	0.55	3.74	-1.613	8.40e-169
ANKRD35	ENSG00000198483.12	0.21	1.61	-1.109	3.99e-182
ANKRD36	ENSG00000135976.16	2.11	7.41	-1.435	4.03e-136
ANKRD36B	ENSG00000196912.12	2.44	6.86	-1.192	5.23e-109
ANKRD36C	ENSG00000174501.14	0.64	2.26	-0.991	1.36e-133
ANKRD37	ENSG00000186352.8	7.04	14.32	-0.93	5.91e-62
ANKRD44	ENSG00000065413.16	2.2	3.99	-0.641	5.96e-43
ANKRD49	ENSG00000168876.8	10.335	19.62	-0.863	2.87e-115
ANKRD52	ENSG00000139645.9	6.195	13.32	-0.993	3.27e-119
ANKRD53	ENSG00000144031.11	1.36	5.04	-1.356	2.05e-152
ANKRD6	ENSG00000135299.16	7.015	11.94	-0.691	4.72e-49
ANKRD9	ENSG00000156381.8	2.255	10.24	-1.788	4.69e-177
ANKS1A	ENSG00000064999.13	7.735	15.38	-0.907	1.42e-101
ANKS1B	ENSG00000185046.18	1.83	4.87	-1.053	2.71e-95
ANKS3	ENSG00000168096.14	10.215	26.23	-1.28	3.05e-150
ANKZF1	ENSG00000163516.13	16.12	80.532	-2.252	2.27e-177
ANO2	ENSG00000047617.14	0.44	2.59	-1.318	1.30e-121
ANO5	ENSG00000171714.10	0.68	1.61	-0.636	7.45e-54
ANO7P1	ENSG00000237276.8	2.505	4.54	-0.66	3.93e-44
ANO8	ENSG00000074855.10	2.8	8	-1.244	1.37e-106
ANO9	ENSG00000185101.12	3.395	11.17	-1.469	4.44e-108
ANOS1	ENSG00000011201.10	13.585	6.48	0.963	3.62e-94
ANP32E	ENSG00000143401.14	28.909	17.92	0.661	3.38e-49
ANPEP	ENSG00000166825.13	3.245	11.04	-1.504	6.60e-58
ANTXR1	ENSG00000169604.19	17.195	36.62	-1.048	3.56e-59
ANTXR2	ENSG00000163297.16	4.11	13.54	-1.509	8.80e-123
ANXA1	ENSG00000135046.13	1077.07	243.773	2.139	1.47e-71
ANXA2	ENSG00000182718.16	702.74	408.841	0.78	9.66e-15
ANXA2P2	ENSG00000231991.4	15.455	5.11	1.429	2.52e-53
ANXA2R	ENSG00000177721.4	1.155	2.58	-0.732	3.49e-56
AOAH	ENSG00000136250.11	1.61	3.52	-0.792	1.64e-35
AOC1	ENSG00000002726.19	0.875	0.14	0.718	8.54e-49
AOC2	ENSG00000131480.8	0.21	0.87	-0.628	1.84e-128
AOC3	ENSG00000131471.6	7.365	24.56	-1.611	1.67e-94
AOC4P	ENSG00000260105.6	0.06	0.6	-0.594	1.06e-109
AOX1	ENSG00000138356.13	0.605	20.51	-3.744	3.61e-219
AP000254.8	ENSG00000273271.1	3.955	7.84	-0.835	4.54e-82
AP000275.65	ENSG00000265590.9	5.3	1.66	1.244	4.83e-53
AP000347.2	ENSG00000272578.5	1.3	7.08	-1.813	4.35e-142
AP000347.4	ENSG00000234353.2	2.07	12.75	-2.163	1.14e-127
AP000349.2	ENSG00000280178.1	1.01	0.06	0.923	1.26e-46
AP000442.1	ENSG00000255139.1	1.02	3.76	-1.237	5.22e-159
AP000473.5	ENSG00000228798.1	0.625	2.75	-1.206	7.46e-110
AP000473.8	ENSG00000270093.1	0.26	1.37	-0.911	6.56e-114
AP000580.1	ENSG00000219529.2	1.845	6.18	-1.336	6.14e-124
AP000692.9	ENSG00000228107.1	0.2	1.32	-0.951	1.09e-129
AP000866.1	ENSG00000279342.1	0.64	3.89	-1.576	2.66e-158
AP000892.6	ENSG00000280143.1	1.62	12.2	-2.333	1.15e-171
AP001062.7	ENSG00000184441.4	1.46	5.9	-1.488	1.12e-195
AP001062.8	ENSG00000241728.5	0.57	3.33	-1.464	8.12e-130
AP001189.4	ENSG00000236304.1	0.1	2.04	-1.467	2.20e-175
AP001258.4	ENSG00000245571.6	8.835	4.32	0.886	7.57e-41
AP001412.1	ENSG00000272948.2	0.26	1.07	-0.716	6.24e-86
AP001437.1	ENSG00000273210.1	0.885	2.5	-0.893	1.70e-86
AP001625.6	ENSG00000235772.1	0.23	1.38	-0.952	2.94e-111
AP002518.1	ENSG00000280653.1	2.89	11.18	-1.647	1.47e-10
AP002954.3	ENSG00000255176.1	0.07	0.81	-0.758	1.02e-156
AP003391.1	ENSG00000281272.1	2.46	0	1.791	9.03e-5
AP006621.5	ENSG00000255284.1	6.56	12.32	-0.817	1.16e-69
AP006621.6	ENSG00000255142.1	0	0.52	-0.604	5.55e-42
AP006621.9	ENSG00000269915.1	0.12	1.9	-1.373	1.05e-143
AP1G2	ENSG00000213983.11	36.579	172.924	-2.21	2.75e-148
AP1M2	ENSG00000129354.11	125.739	61.9	1.011	3.92e-110
AP1S1	ENSG00000106367.13	53.434	25.479	1.04	8.44e-142
AP2A2	ENSG00000183020.13	20.97	43.06	-1.004	3.03e-150
AP3M2	ENSG00000070718.11	7.485	12.16	-0.633	2.71e-85
AP4B1	ENSG00000134262.12	8.065	22.13	-1.351	2.61e-174
AP4B1-AS1	ENSG00000226167.1	0.17	1.61	-1.158	5.38e-182
AP5Z1	ENSG00000242802.6	15.105	28.68	-0.882	1.47e-105
APBA1	ENSG00000107282.7	0.74	2	-0.786	3.79e-73
APBA2	ENSG00000034053.14	1.135	3.49	-1.072	6.04e-56
APBA3	ENSG00000011132.11	10.67	22.4	-1.004	3.07e-161
APBB1	ENSG00000166313.18	23.475	40.941	-0.777	8.07e-91
APBB2	ENSG00000163697.16	16.885	34.961	-1.008	9.22e-79
APBB3	ENSG00000113108.17	15.165	76.51	-2.262	1.52e-169
APLNR	ENSG00000134817.10	13.785	8.26	0.675	2.58e-14
APLP2	ENSG00000084234.16	1048.06	376.654	1.474	3.28e-101
APOA1	ENSG00000118137.9	0.64	3.6	-1.488	1.40e-27
APOBEC3C	ENSG00000244509.3	20.634	11.6	0.78	2.04e-54
APOBEC3G	ENSG00000239713.7	11.61	7.01	0.655	4.11e-25
APOBEC3H	ENSG00000100298.15	1.82	0.62	0.8	9.55e-56
APOC1	ENSG00000130208.9	200.769	30.34	2.687	3.13e-67
APOC1P1	ENSG00000214855.9	1.275	0.12	1.022	2.69e-46
APOC2	ENSG00000234906.8	2.685	0.21	1.607	5.77e-69
APOC4-APOC2	ENSG00000224916.8	3.65	0.48	1.652	4.29e-67
APOD	ENSG00000189058.8	11.075	689.974	-5.839	1.76e-232
APOE	ENSG00000130203.9	328.044	131.406	1.313	1.38e-26
APOL1	ENSG00000100342.20	31.666	16.91	0.867	1.83e-14
APOL3	ENSG00000128284.19	10.105	43.221	-1.994	6.63e-151
APOL4	ENSG00000100336.17	1.915	4.31	-0.865	1.62e-31
APOLD1	ENSG00000178878.12	18.34	36.681	-0.962	3.35e-25
APPL2	ENSG00000136044.11	13.505	21.791	-0.652	2.18e-64
APTR	ENSG00000214293.8	24.739	44.359	-0.817	3.43e-48
AQP4	ENSG00000171885.13	2.515	5.53	-0.894	3.16e-20
AQP4-AS1	ENSG00000260372.6	0.2	0.81	-0.593	6.87e-45
AQP5	ENSG00000161798.6	7.455	1.97	1.509	4.28e-45
AQP7	ENSG00000165269.12	0.7	5.7	-1.979	5.69e-107
AR	ENSG00000169083.15	0.68	2.65	-1.119	9.89e-67
ARAP1-AS1	ENSG00000256007.1	6.685	0	2.942	1.01e-17
ARAP1-AS2	ENSG00000245148.2	0.08	0.81	-0.745	1.96e-154
ARAP2	ENSG00000047365.11	8.75	27.851	-1.565	5.04e-158
ARAP3	ENSG00000120318.15	6.35	17.61	-1.34	9.23e-80
ARF6	ENSG00000165527.6	39.015	21.05	0.86	4.16e-68
ARFGAP1	ENSG00000101199.12	33.195	94.732	-1.485	3.18e-167
ARFGAP3	ENSG00000242247.10	28.27	43.099	-0.591	8.06e-58
ARGLU1	ENSG00000134884.13	42.21	211.526	-2.298	4.17e-161
ARHGAP10	ENSG00000071205.11	10.325	18.661	-0.796	1.28e-66
ARHGAP15	ENSG00000075884.12	3.99	7.34	-0.741	3.65e-39
ARHGAP17	ENSG00000140750.16	30.38	47.339	-0.623	3.59e-68
ARHGAP18	ENSG00000146376.10	19.03	9.25	0.967	2.13e-63
ARHGAP20	ENSG00000137727.12	1.575	3.63	-0.846	4.69e-48
ARHGAP21	ENSG00000107863.16	9.755	28.041	-1.433	4.46e-163
ARHGAP24	ENSG00000138639.17	4.895	19.39	-1.79	1.01e-71
ARHGAP26	ENSG00000145819.15	2.85	8.93	-1.367	6.47e-153
ARHGAP27	ENSG00000159314.11	14.165	27.93	-0.932	2.19e-62
ARHGAP29	ENSG00000137962.12	17.055	27.53	-0.66	1.26e-39
ARHGAP32	ENSG00000134909.18	2.14	4.1	-0.7	5.31e-67
ARHGAP33	ENSG00000004777.18	2.97	29.51	-2.942	1.15e-193
ARHGAP36	ENSG00000147256.10	16.852	0.04	4.101	3.69e-87
ARHGAP39	ENSG00000147799.11	3.72	7.94	-0.921	5.10e-114
ARHGAP4	ENSG00000089820.15	9.39	21.17	-1.093	1.19e-45
ARHGAP6	ENSG00000047648.21	9.645	22.7	-1.155	5.15e-109
ARHGAP8	ENSG00000241484.9	14.05	33.929	-1.215	1.28e-107
ARHGAP9	ENSG00000123329.17	4.63	8.94	-0.82	7.62e-23
ARHGDIB	ENSG00000111348.8	212.644	116.71	0.86	1.90e-54
ARHGEF1	ENSG00000076928.17	34.38	107.031	-1.61	1.79e-144
ARHGEF10	ENSG00000104728.15	6.98	17.869	-1.242	6.48e-111
ARHGEF10L	ENSG00000074964.16	15.22	33.681	-1.096	8.45e-102
ARHGEF11	ENSG00000132694.18	11.025	22.461	-0.964	4.50e-104
ARHGEF15	ENSG00000198844.10	6.48	15.82	-1.169	8.98e-57
ARHGEF17	ENSG00000110237.3	23.735	81.968	-1.746	2.80e-135
ARHGEF25	ENSG00000240771.6	3.595	16.33	-1.915	6.42e-141
ARHGEF28	ENSG00000214944.9	4.365	17.66	-1.798	1.23e-127
ARHGEF33	ENSG00000214694.10	0.47	1.46	-0.743	4.39e-119
ARHGEF34P	ENSG00000204959.4	5.1	9.5	-0.784	1.11e-34
ARHGEF37	ENSG00000183111.11	0.805	2.68	-1.028	5.35e-73
ARHGEF39	ENSG00000137135.17	0.445	1.47	-0.773	4.52e-102
ARHGEF4	ENSG00000136002.16	6.035	19.68	-1.556	1.69e-121
ARHGEF5	ENSG00000050327.14	17.85	28.159	-0.629	1.02e-52
ARHGEF6	ENSG00000129675.15	2.3	5.51	-0.98	1.45e-75
ARHGEF7	ENSG00000102606.17	12.635	42.979	-1.69	1.03e-173
ARID3B	ENSG00000179361.17	2.005	5.2	-1.045	3.99e-148
ARID5A	ENSG00000196843.15	9.03	23.119	-1.266	2.88e-78
ARID5B	ENSG00000150347.14	3.38	6.77	-0.827	4.71e-31
ARIH2	ENSG00000177479.19	31.501	55.23	-0.791	6.35e-95
ARL10	ENSG00000175414.6	0.85	1.88	-0.639	2.67e-77
ARL17A	ENSG00000185829.15	3.585	13.88	-1.698	2.63e-173
ARL2	ENSG00000213465.7	67.155	103.759	-0.62	7.90e-81
ARL4A	ENSG00000122644.12	9.585	19.721	-0.969	2.17e-95
ARL6IP1	ENSG00000170540.14	101.128	62.249	0.691	2.02e-39
ARL6IP5	ENSG00000144746.6	111.445	58.948	0.907	1.05e-104
ARMC12	ENSG00000157343.8	0.18	2.22	-1.448	1.79e-181
ARMC2	ENSG00000118690.12	1.73	3.92	-0.85	2.02e-120
ARMC5	ENSG00000140691.16	9.185	15.14	-0.664	2.00e-68
ARMCX3	ENSG00000102401.19	95.464	42.49	1.149	2.25e-55
ARMCX4	ENSG00000196440.11	8.17	24.68	-1.486	3.59e-157
ARMCX6	ENSG00000198960.10	80.12	35.74	1.143	3.01e-91
ARNT	ENSG00000143437.20	13.845	21.47	-0.598	6.93e-63
ARPC3	ENSG00000111229.15	272.837	173.982	0.646	3.17e-140
ARPC4-TTLL3	ENSG00000250151.9	4.655	11.72	-1.17	5.36e-91
ARRB1	ENSG00000137486.16	6	10.11	-0.666	1.54e-47
ARRB2	ENSG00000141480.17	15.009	25.4	-0.722	1.42e-43
ARRDC1	ENSG00000197070.13	40.411	76.547	-0.905	1.79e-76
ARRDC1-AS1	ENSG00000203993.4	11.57	25.01	-1.049	4.81e-149
ARRDC4	ENSG00000140450.8	7.695	16.84	-1.037	2.34e-64
ARSA	ENSG00000100299.17	40.53	65.812	-0.686	5.75e-64
ARSD	ENSG00000006756.15	32.015	18.43	0.765	4.14e-62
ART4	ENSG00000111339.10	0.28	3.24	-1.728	7.06e-180
ART5	ENSG00000167311.13	0.36	2.61	-1.408	3.42e-147
ARVCF	ENSG00000099889.13	24.6	49.292	-0.974	1.02e-85
AS3MT	ENSG00000214435.7	4.88	8.15	-0.638	2.06e-34
ASAP1	ENSG00000153317.14	9.5	18.06	-0.86	2.57e-67
ASAP3	ENSG00000088280.18	18.88	37.519	-0.954	7.35e-125
ASB16	ENSG00000161664.6	0.395	1.45	-0.812	2.23e-143
ASCC3	ENSG00000112249.13	13.305	8.25	0.629	1.78e-50
ASF1B	ENSG00000105011.8	4.125	0.65	1.635	6.47e-159
ASGR1	ENSG00000141505.11	3.11	6.7	-0.906	2.06e-37
ASH1L	ENSG00000116539.10	9.24	15.69	-0.705	1.81e-55
ASH1L-AS1	ENSG00000235919.4	2.2	5.17	-0.947	1.13e-133
ASIC3	ENSG00000213199.7	0.5	7.49	-2.501	7.49e-205
ASMTL-AS1	ENSG00000236017.7	4.345	49.71	-3.246	1.16e-161
ASNS	ENSG00000070669.16	13.11	27.42	-1.01	3.87e-65
ASPA	ENSG00000108381.10	0.27	1.63	-1.05	9.00e-146
ASPG	ENSG00000166183.15	0.26	7.43	-2.742	4.37e-196
ASPH	ENSG00000198363.15	34.805	67.218	-0.93	8.12e-77
ASPHD1	ENSG00000174939.10	1.845	0.33	1.097	3.94e-68
ASPN	ENSG00000106819.11	4.215	7.21	-0.655	6.04e-12
ASPRV1	ENSG00000244617.2	0.54	1.37	-0.622	7.36e-135
ASPSCR1	ENSG00000169696.15	27.825	46.029	-0.706	4.08e-61
ASRGL1	ENSG00000162174.12	5.01	8.37	-0.641	6.54e-42
ASS1	ENSG00000130707.17	220.265	127.229	0.787	2.37e-50
ASXL1	ENSG00000171456.16	15.055	53.072	-1.752	4.21e-187
ASXL3	ENSG00000141431.9	0.07	1.68	-1.325	1.93e-195
ATAD2	ENSG00000156802.12	4.955	2.88	0.618	3.47e-45
ATAD2B	ENSG00000119778.14	2.84	7.22	-1.098	4.15e-145
ATAD3B	ENSG00000160072.19	6.285	31.13	-2.141	1.30e-183
ATAT1	ENSG00000137343.17	6.11	17.66	-1.392	3.69e-140
ATF4	ENSG00000128272.14	201.006	344.413	-0.774	2.78e-97
ATF7	ENSG00000170653.18	11.205	19.34	-0.737	1.64e-106
ATF7IP2	ENSG00000166669.13	7.42	14.4	-0.871	1.44e-55
ATG12	ENSG00000145782.12	17.57	29.51	-0.716	9.24e-114
ATG14	ENSG00000126775.8	6.89	11	-0.605	1.07e-83
ATG16L1	ENSG00000085978.21	13.78	21.55	-0.61	2.82e-77
ATG16L2	ENSG00000168010.10	11.165	47.609	-1.998	4.93e-143
ATG2B	ENSG00000066739.11	4.55	12.7	-1.304	4.17e-139
ATG4B	ENSG00000168397.16	28.386	90.59	-1.64	2.12e-197
ATG4D	ENSG00000130734.9	17.275	32.09	-0.857	1.25e-100
ATG9B	ENSG00000181652.18	0.57	1.43	-0.63	6.59e-48
ATHL1	ENSG00000142102.15	8.425	109.591	-3.553	5.37e-138
ATIC	ENSG00000138363.14	83.748	42.991	0.946	2.35e-91
ATM	ENSG00000149311.17	9.085	17.38	-0.866	1.85e-77
ATN1	ENSG00000111676.14	71.3	220.876	-1.618	2.21e-166
ATOH8	ENSG00000168874.12	50.609	103.078	-1.012	5.05e-50
ATP10D	ENSG00000145246.13	5.29	12.93	-1.147	2.42e-116
ATP11C	ENSG00000101974.14	4.315	6.99	-0.588	5.18e-79
ATP13A1	ENSG00000105726.16	34.9	64.221	-0.861	1.21e-107
ATP13A5	ENSG00000187527.10	0.28	1.72	-1.087	7.46e-143
ATP1A1-AS1	ENSG00000203865.9	3.13	9.29	-1.317	5.07e-145
ATP1A2	ENSG00000018625.14	0.48	2.41	-1.204	4.96e-91
ATP1B3-AS1	ENSG00000244124.1	0.025	0.61	-0.652	9.03e-78
ATP2A1	ENSG00000196296.13	0.365	2.49	-1.354	2.42e-110
ATP2A3	ENSG00000074370.17	7.32	16.05	-1.035	1.95e-50
ATP2C2	ENSG00000064270.12	1.2	15.32	-2.891	1.75e-206
ATP5HP4	ENSG00000234925.2	0.14	0.75	-0.618	1.55e-112
ATP5L	ENSG00000167283.7	393.657	222.366	0.821	4.13e-99
ATP6AP1L	ENSG00000205464.11	3.695	6.75	-0.723	2.17e-67
ATP6V0E2-AS1	ENSG00000204934.10	0.71	2.59	-1.07	7.98e-87
ATP6V1A	ENSG00000114573.9	36.29	20.369	0.803	7.74e-54
ATP6V1C2	ENSG00000143882.9	0.78	3.54	-1.351	5.39e-113
ATP6V1D	ENSG00000100554.11	130.3	77.74	0.738	4.75e-65
ATP6V1F	ENSG00000128524.4	178.7	102.387	0.798	6.89e-166
ATP6V1G1	ENSG00000136888.6	166.883	103.751	0.68	1.01e-62
ATP6V1G2	ENSG00000213760.10	2.26	4.06	-0.634	1.52e-32
ATP7B	ENSG00000123191.13	0.54	2.07	-0.995	9.40e-170
ATP8A1	ENSG00000124406.16	24.875	52.07	-1.036	8.78e-69
ATP8B2	ENSG00000143515.16	9.685	23.821	-1.216	1.51e-112
ATP8B4	ENSG00000104043.14	0.69	2.22	-0.93	1.33e-119
ATPIF1	ENSG00000130770.17	355.941	199.203	0.834	6.83e-104
ATR	ENSG00000175054.14	7.11	14.07	-0.894	5.62e-148
ATXN2	ENSG00000204842.14	20.9	35.7	-0.745	7.44e-99
ATXN2L	ENSG00000168488.18	49.752	100.97	-1.007	2.48e-110
ATXN3	ENSG00000066427.21	8.97	16.08	-0.777	7.33e-104
ATXN7	ENSG00000163635.17	4.655	11.27	-1.118	1.22e-131
ATXN7L1	ENSG00000146776.14	3.34	6.83	-0.851	7.37e-144
ATXN7L2	ENSG00000162650.15	5.39	15.42	-1.362	1.45e-139
AUP1	ENSG00000115307.16	82.475	159.487	-0.943	1.27e-143
AURKB	ENSG00000178999.12	1.485	0.51	0.719	1.61e-26
AUTS2	ENSG00000158321.15	6.695	11.84	-0.739	3.58e-19
AVIL	ENSG00000135407.10	3.35	11.89	-1.567	1.87e-112
AVPR1A	ENSG00000166148.3	0.71	6.24	-2.082	1.59e-142
AVPR2	ENSG00000126895.13	0.81	2.06	-0.758	2.14e-57
AXIN2	ENSG00000168646.12	4.19	14.46	-1.575	1.75e-123
AXL	ENSG00000167601.11	10.76	16.72	-0.591	2.11e-28
AZGP1	ENSG00000160862.12	0.03	0.99	-0.95	4.45e-83
AZI2	ENSG00000163512.13	25.751	39.78	-0.608	6.71e-62
B2M	ENSG00000166710.17	8046.52	4111.36	0.969	3.51e-37
B3GALNT2	ENSG00000162885.12	4.06	7.01	-0.663	5.76e-34
B3GALT5	ENSG00000183778.17	0.12	0.75	-0.644	5.16e-67
B3GALT5-AS1	ENSG00000184809.12	0.31	1.4	-0.873	9.35e-35
B3GAT1	ENSG00000109956.12	12.4	4.95	1.171	4.81e-52
B3GAT2	ENSG00000112309.10	0.16	1.14	-0.883	4.32e-188
B3GNT2	ENSG00000170340.10	16.695	10.36	0.639	5.41e-29
B3GNT3	ENSG00000179913.10	13.825	0.17	3.663	5.06e-106
B3GNT7	ENSG00000156966.6	7.455	2.21	1.397	3.83e-71
B3GNT8	ENSG00000177191.2	4.765	1.53	1.188	6.89e-86
B4GALNT1	ENSG00000135454.13	0.46	2.37	-1.207	2.14e-123
B4GALNT2	ENSG00000167080.8	0.4	1.48	-0.825	7.49e-29
B4GALNT3	ENSG00000139044.10	6.835	3.25	0.882	1.32e-42
B4GALNT4	ENSG00000182272.11	0.14	0.83	-0.683	7.53e-57
B4GALT6	ENSG00000118276.11	2.285	1.15	0.612	7.48e-47
BAALC	ENSG00000164929.16	0.8	4.65	-1.65	7.96e-135
BACE1-AS	ENSG00000278768.1	6.995	12.8	-0.788	1.72e-71
BAHCC1	ENSG00000266074.8	4.86	16.52	-1.58	1.01e-142
BAIAP2L2	ENSG00000128298.16	0.56	2.74	-1.261	3.95e-146
BAIAP3	ENSG00000007516.13	5.135	2.36	0.869	3.46e-22
BANF1	ENSG00000175334.7	248.99	158.363	0.65	7.26e-75
BANP	ENSG00000172530.19	8.77	16.39	-0.832	2.80e-135
BAP1	ENSG00000163930.9	36.375	66.99	-0.863	1.87e-140
BASP1	ENSG00000176788.8	46.68	12.18	1.855	2.88e-85
BAX	ENSG00000087088.19	129.337	66.981	0.939	7.31e-129
BAZ2A	ENSG00000076108.11	20.1	52.12	-1.332	2.67e-105
BBC3	ENSG00000105327.15	12.32	4.54	1.266	3.24e-106
BBOX1	ENSG00000129151.8	3.72	10.47	-1.281	2.34e-52
BBS4	ENSG00000140463.13	11.905	31.43	-1.329	2.37e-153
BBS5	ENSG00000163093.11	6.79	13.64	-0.91	1.08e-114
BCAM	ENSG00000187244.10	150.821	317.43	-1.069	2.95e-67
BCAS4	ENSG00000124243.17	17.66	6.02	1.41	6.66e-86
BCAT2	ENSG00000105552.14	24.411	39.491	-0.672	9.94e-74
BCHE	ENSG00000114200.9	0.35	1.1	-0.637	4.31e-5
BCL2	ENSG00000171791.11	8.005	16.68	-0.973	1.12e-49
BCL2A1	ENSG00000140379.7	3.075	1.57	0.665	1.09e-8
BCL2L11	ENSG00000153094.21	8.715	18.731	-1.022	7.00e-103
BCL2L2	ENSG00000129473.9	24.5	39.01	-0.65	2.44e-64
BCL2L2-PABPN1	ENSG00000258643.5	0.77	3.17	-1.236	5.31e-27
BCL3	ENSG00000069399.12	21.675	59.9	-1.425	2.55e-72
BCL6	ENSG00000113916.17	13.63	63.72	-2.145	8.56e-168
BCL6B	ENSG00000161940.10	6.065	11.41	-0.813	3.98e-40
BCL9L	ENSG00000186174.12	12.92	23.681	-0.826	1.15e-42
BCO2	ENSG00000197580.11	1.365	7.82	-1.899	6.57e-141
BCS1L	ENSG00000074582.12	19.42	53.171	-1.408	1.11e-178
BDH1	ENSG00000161267.11	20.28	36.151	-0.804	8.95e-38
BDKRB1	ENSG00000100739.10	0.3	1.05	-0.657	1.01e-64
BEAN1	ENSG00000166546.13	4.035	1.47	1.027	1.73e-50
BEGAIN	ENSG00000183092.15	0.28	1.34	-0.87	4.56e-123
BEND3P3	ENSG00000278616.1	0.48	1.24	-0.598	8.05e-81
BEST1	ENSG00000167995.15	1.56	3.15	-0.697	3.17e-82
BET1P1	ENSG00000241134.3	0.13	0.8	-0.672	7.42e-82
BEX1	ENSG00000133169.5	6.68	24.17	-1.713	1.26e-42
BFSP1	ENSG00000125864.11	1.705	3.06	-0.586	1.71e-13
BGLAP	ENSG00000242252.1	0.845	3.45	-1.27	1.53e-106
BGN	ENSG00000182492.15	119.146	228.317	-0.933	1.03e-29
BHLHB9P1	ENSG00000258915.1	0.08	0.69	-0.646	5.30e-136
BHLHE22	ENSG00000180828.2	0.07	0.62	-0.598	1.58e-87
BHLHE40	ENSG00000134107.4	96.492	53.772	0.832	5.44e-9
BHLHE41	ENSG00000123095.5	87.674	31.58	1.445	5.45e-60
BHMT2	ENSG00000132840.9	7.23	29.11	-1.871	1.82e-100
BICC1	ENSG00000122870.11	0.995	4.39	-1.434	4.91e-127
BID	ENSG00000015475.18	31.32	7.86	1.867	4.77e-112
BIN1	ENSG00000136717.14	24.27	38.899	-0.659	3.88e-64
BIRC7	ENSG00000101197.12	1.415	0.13	1.096	7.98e-52
BIVM	ENSG00000134897.13	6.255	13.36	-0.985	1.21e-136
BLNK	ENSG00000095585.16	19.84	10.99	0.797	7.58e-45
BLOC1S2	ENSG00000196072.11	45.895	29.019	0.644	6.94e-98
BLVRA	ENSG00000106605.10	49.405	28.58	0.769	1.13e-116
BMP4	ENSG00000125378.15	5.11	8.79	-0.68	2.30e-17
BMP5	ENSG00000112175.7	0.04	0.82	-0.807	8.52e-155
BMP8A	ENSG00000183682.7	0.34	10.26	-3.071	3.53e-79
BMP8B	ENSG00000116985.10	2.08	4.12	-0.733	6.43e-32
BMPR1APS2	ENSG00000232460.4	1.03	0.24	0.711	6.46e-12
BMS1P1	ENSG00000204177.10	0.94	3.46	-1.201	1.77e-169
BMS1P2	ENSG00000251079.6	0.345	1.75	-1.032	4.76e-173
BMS1P20	ENSG00000236850.4	1.745	4.12	-0.899	8.80e-114
BMS1P4	ENSG00000271816.1	0.53	1.91	-0.927	1.48e-164
BMX	ENSG00000102010.14	0.57	1.84	-0.855	3.55e-50
BNIP2	ENSG00000140299.11	21.6	41.4	-0.908	4.50e-113
BNIP3P17	ENSG00000271524.1	0.57	3.64	-1.563	2.55e-48
BNIP3P18	ENSG00000269055.1	0.13	2.43	-1.602	3.15e-170
BNIP3P30	ENSG00000268079.1	0.43	1.52	-0.817	8.58e-94
BOC	ENSG00000144857.14	18.515	36.539	-0.944	9.31e-50
BOD1L1	ENSG00000038219.12	13.09	21.151	-0.653	1.55e-66
BOLA2B	ENSG00000169627.7	67.859	43.709	0.623	2.75e-57
BOP1	ENSG00000261236.5	22.335	80.979	-1.813	1.43e-146
bP-21264C1.1	ENSG00000279208.1	0.35	2.22	-1.254	1.48e-79
bP-21264C1.2	ENSG00000278932.3	3.42	6.59	-0.78	3.03e-37
bP-2189O9.2	ENSG00000278931.1	0.07	1.04	-0.931	4.33e-163
BPNT1	ENSG00000162813.17	18.64	11.05	0.705	9.27e-42
BPTF	ENSG00000171634.16	24.261	37.859	-0.621	1.56e-57
BRCA1	ENSG00000012048.19	2.49	4.59	-0.68	2.81e-38
BRD1	ENSG00000100425.18	12.82	21.209	-0.684	5.08e-94
BRD2	ENSG00000204256.12	132.325	249.777	-0.911	6.81e-130
BRD2-IT1	ENSG00000223837.2	0.24	1.37	-0.935	8.58e-94
BRD4	ENSG00000141867.17	16.995	31.871	-0.869	1.88e-126
BRD8	ENSG00000112983.17	26.665	72.378	-1.407	4.25e-156
BRD9P2	ENSG00000249908.2	0	1.05	-1.036	1.16e-47
BRF1	ENSG00000185024.15	13.94	23.259	-0.699	8.38e-102
BRICD5	ENSG00000182685.7	6.185	35.24	-2.335	8.27e-125
BRINP1	ENSG00000078725.12	1.825	0.28	1.142	1.34e-72
BRINP2	ENSG00000198797.6	0.69	0.04	0.7	2.67e-58
BRINP3	ENSG00000162670.10	0.11	1.64	-1.25	7.10e-151
BRSK1	ENSG00000160469.16	0.785	2.13	-0.81	1.45e-18
BRSK2	ENSG00000174672.15	0.27	2.11	-1.292	1.58e-169
BRWD3	ENSG00000165288.10	1.695	3.92	-0.868	6.79e-114
BSNDP2	ENSG00000274973.1	0	0.64	-0.714	1.49e-78
BST1	ENSG00000109743.10	1.905	4.17	-0.832	1.87e-88
BST2	ENSG00000130303.12	30.864	47.271	-0.599	5.05e-17
BTAF1	ENSG00000095564.13	6.12	22.63	-1.731	9.90e-137
BTBD11	ENSG00000151136.14	5.49	12.64	-1.072	1.70e-36
BTBD19	ENSG00000222009.8	4.66	15.27	-1.523	4.08e-102
BTC	ENSG00000174808.11	5.535	3.32	0.597	7.36e-39
BTF3L4P2	ENSG00000213189.5	38.65	22.221	0.772	4.72e-53
BTG2	ENSG00000159388.5	105.499	66.178	0.665	7.33e-13
BTN2A1	ENSG00000112763.15	10.36	19.03	-0.818	4.32e-97
BTN2A3P	ENSG00000124549.14	0.88	2.78	-1.008	1.39e-142
BTN3A3	ENSG00000111801.15	8.795	14.06	-0.621	4.66e-32
BTNL8	ENSG00000113303.11	0.11	1.51	-1.177	1.14e-172
BTNL9	ENSG00000165810.16	3.91	46.401	-3.271	8.54e-148
BUB1	ENSG00000169679.14	1.04	0.26	0.695	7.12e-53
BVES	ENSG00000112276.13	0.255	1.13	-0.763	8.09e-79
BX322557.10	ENSG00000215447.7	1.81	5.46	-1.201	4.00e-130
BX842568.1	ENSG00000235510.1	0	1.21	-1.144	7.93e-46
BZRAP1	ENSG00000005379.15	11.7	55.119	-2.144	2.45e-183
C10orf10	ENSG00000165507.8	31.62	119.601	-1.886	1.24e-89
C10orf11	ENSG00000148655.14	37.225	24.17	0.603	2.17e-71
C10orf128	ENSG00000204161.13	4.57	11.36	-1.15	4.71e-73
C10orf55	ENSG00000222047.8	0.88	0.23	0.612	5.17e-49
C10orf82	ENSG00000165863.16	1.06	3.48	-1.121	7.87e-52
C10orf95	ENSG00000120055.7	3.055	1.66	0.608	5.28e-30
C11orf30	ENSG00000158636.16	4.395	10.79	-1.128	3.74e-151
C11orf49	ENSG00000149179.13	46.965	30.25	0.618	8.34e-73
C11orf74	ENSG00000166352.15	16.325	51.31	-1.594	9.51e-77
C11orf80	ENSG00000173715.15	14.945	6.34	1.119	1.25e-59
C11orf96	ENSG00000187479.5	8.22	73.699	-3.018	5.75e-136
C12orf49	ENSG00000111412.5	57.031	33.59	0.746	6.24e-36
C12orf60	ENSG00000182993.3	0.72	1.73	-0.666	6.89e-105
C14orf119	ENSG00000179933.5	67.351	40.669	0.714	4.19e-63
C14orf132	ENSG00000227051.5	0.51	1.72	-0.849	5.21e-113
C14orf159	ENSG00000133943.20	23.815	42.49	-0.809	2.25e-87
C14orf180	ENSG00000184601.10	0	0.55	-0.632	8.82e-101
C15orf48	ENSG00000166920.10	13.375	2.23	2.154	9.52e-84
C15orf52	ENSG00000188549.12	9.425	61.099	-2.575	4.49e-181
C15orf59	ENSG00000205363.5	0.69	3.33	-1.357	1.63e-99
C16orf45	ENSG00000166780.10	26.81	15.97	0.713	9.22e-33
C16orf46	ENSG00000166455.13	3.375	7.08	-0.885	8.46e-72
C16orf52	ENSG00000185716.11	5.11	9.73	-0.812	3.52e-134
C16orf58	ENSG00000140688.16	63.405	101.504	-0.67	6.31e-88
C16orf71	ENSG00000166246.13	0.92	1.97	-0.629	2.56e-34
C16orf86	ENSG00000159761.14	1.76	6.38	-1.419	1.54e-192
C16orf93	ENSG00000196118.11	7.45	19.24	-1.26	1.61e-107
C17orf107	ENSG00000205710.3	3.66	1.45	0.928	6.42e-52
C17orf49	ENSG00000258315.5	129.14	78.15	0.717	9.69e-90
C17orf51	ENSG00000212719.10	0.8	1.76	-0.617	8.12e-113
C17orf58	ENSG00000186665.8	13.235	7.21	0.794	7.55e-78
C17orf67	ENSG00000214226.8	0.46	1.88	-0.98	2.19e-145
C17orf85	ENSG00000074356.16	14.66	28.531	-0.915	1.12e-119
C18orf8	ENSG00000141452.9	17.075	27.08	-0.636	4.61e-99
C19orf18	ENSG00000177025.3	0.79	1.73	-0.609	1.10e-74
C19orf33	ENSG00000167644.11	115.639	17.09	2.689	8.90e-69
C19orf44	ENSG00000105072.8	4.265	7.89	-0.756	4.75e-119
C19orf53	ENSG00000104979.8	219.297	126.719	0.786	1.91e-113
C19orf54	ENSG00000188493.14	5.05	10.62	-0.942	7.53e-143
C19orf60	ENSG00000006015.17	34.24	53.76	-0.636	2.07e-31
C19orf66	ENSG00000130813.17	24.96	47.441	-0.9	7.80e-93
C19orf71	ENSG00000183397.5	1.105	8.67	-2.2	2.28e-188
C1orf101	ENSG00000179397.17	0.56	1.36	-0.597	4.51e-127
C1orf106	ENSG00000163362.10	2.32	0.21	1.456	9.04e-67
C1orf115	ENSG00000162817.6	38.534	19.04	0.98	8.06e-51
C1orf116	ENSG00000182795.12	16.105	4.82	1.555	3.71e-47
C1orf131	ENSG00000143633.12	7.37	14.73	-0.91	6.32e-142
C1orf132	ENSG00000203709.9	0.6	1.97	-0.892	1.79e-60
C1orf145	ENSG00000162913.9	1.59	4.4	-1.06	4.21e-87
C1orf159	ENSG00000131591.17	4.545	14.61	-1.493	1.61e-163
C1orf168	ENSG00000187889.12	0.175	0.95	-0.731	6.87e-44
C1orf194	ENSG00000179902.12	0.09	0.64	-0.589	1.31e-36
C1orf198	ENSG00000119280.16	19.225	36.98	-0.909	6.60e-76
C1orf204	ENSG00000188004.9	1.44	2.85	-0.658	2.37e-67
C1orf220	ENSG00000213057.5	0.18	1.03	-0.783	3.37e-126
C1orf226	ENSG00000239887.4	2.68	0.92	0.939	5.31e-73
C1orf228	ENSG00000198520.10	1.305	3.44	-0.946	2.98e-59
C1orf233	ENSG00000228594.3	11.18	5.49	0.908	8.03e-64
C1orf43	ENSG00000143612.18	156.861	103.421	0.596	1.85e-64
C1orf52	ENSG00000162642.13	11.735	19.49	-0.686	3.54e-104
C1QA	ENSG00000173372.16	63.341	32.139	0.957	1.96e-30
C1QB	ENSG00000173369.15	55.539	36.231	0.603	2.87e-13
C1QC	ENSG00000159189.11	42.118	23.34	0.825	2.55e-20
C1QL1	ENSG00000131094.3	1.87	0.33	1.11	4.90e-60
C1QTNF1	ENSG00000173918.14	20.245	117.384	-2.478	3.51e-135
C1QTNF2	ENSG00000145861.7	0.48	1.35	-0.667	1.40e-76
C1QTNF3	ENSG00000082196.20	1.64	5.22	-1.236	1.80e-86
C1QTNF4	ENSG00000172247.3	0.14	1.04	-0.84	1.80e-89
C1QTNF7	ENSG00000163145.12	0.335	2.37	-1.336	1.74e-119
C1R	ENSG00000159403.15	25.409	235.387	-3.162	1.35e-143
C1RL-AS1	ENSG00000205885.7	1.16	4.85	-1.437	1.13e-135
C1S	ENSG00000182326.14	16.864	263.032	-3.886	4.36e-157
C20orf96	ENSG00000196476.11	9.085	18.1	-0.921	2.88e-97
C21orf2	ENSG00000160226.15	32.82	54.288	-0.709	3.11e-72
C22orf34	ENSG00000188511.12	1.13	2.2	-0.587	2.37e-41
C2CD2	ENSG00000157617.16	5.14	11.5	-1.026	5.30e-135
C2CD4A	ENSG00000198535.5	0.77	0.05	0.753	4.28e-53
C2CD5	ENSG00000111731.12	14.705	26.541	-0.81	4.12e-75
C2orf15	ENSG00000273045.5	4.56	2.69	0.591	5.22e-42
C2orf27AP3	ENSG00000230804.2	0.47	1.22	-0.595	6.62e-32
C2orf40	ENSG00000119147.9	192.47	120.391	0.672	1.29e-8
C2orf81	ENSG00000159239.11	9.435	4.28	0.983	9.31e-65
C2orf88	ENSG00000187699.10	1.22	2.8	-0.775	1.47e-59
C3orf18	ENSG00000088543.14	7.76	12.99	-0.675	2.13e-50
C3orf35	ENSG00000198590.11	0.5	1.99	-0.995	2.34e-137
C3orf52	ENSG00000114529.12	6.505	11.02	-0.68	5.89e-35
C4A-AS1	ENSG00000233627.2	0.55	3.25	-1.455	6.93e-113
C4B-AS1	ENSG00000229776.1	0.55	3.25	-1.455	6.93e-113
C4orf19	ENSG00000154274.14	0.4	1.19	-0.646	1.10e-56
C4orf29	ENSG00000164074.14	3.545	7.24	-0.858	3.67e-122
C4orf32	ENSG00000174749.5	1.375	3.59	-0.951	5.27e-141
C4orf47	ENSG00000205129.8	1.94	6.38	-1.328	3.23e-120
C4orf48	ENSG00000243449.6	20.065	8.25	1.187	4.17e-50
C5orf15	ENSG00000113583.7	47.56	30.319	0.633	5.03e-31
C5orf28	ENSG00000151881.14	10.26	17.52	-0.718	6.12e-59
C5orf42	ENSG00000197603.13	6.09	9.69	-0.592	9.69e-40
C5orf45	ENSG00000161010.14	23.835	66.082	-1.434	2.52e-141
C5orf56	ENSG00000197536.10	7.1	19.53	-1.342	1.50e-167
C5orf58	ENSG00000234511.8	0.11	0.77	-0.673	3.49e-96
C5orf63	ENSG00000164241.13	3.045	6.86	-0.958	7.48e-113
C5orf66	ENSG00000224186.8	0.31	1.19	-0.741	5.77e-86
C6	ENSG00000039537.13	0.05	2.53	-1.749	1.97e-206
C6orf1	ENSG00000186577.11	62.234	39.129	0.656	3.13e-68
C6orf136	ENSG00000204564.11	15.925	32.919	-1.003	1.28e-115
C6orf141	ENSG00000197261.11	0.18	4.37	-2.186	4.49e-198
C6orf163	ENSG00000203872.6	0.32	1.58	-0.967	8.30e-148
C6orf3	ENSG00000255389.1	1.03	2.5	-0.786	4.61e-98
C6orf49	ENSG00000278224.4	0.98	6	-1.822	7.16e-165
C7	ENSG00000112936.18	6.695	127.432	-4.061	4.77e-145
C7orf43	ENSG00000146826.14	13.46	31.701	-1.177	6.38e-108
C7orf55-LUC7L2	ENSG00000146963.17	49.545	117.197	-1.226	2.01e-150
C8G	ENSG00000176919.11	0.62	1.55	-0.654	3.49e-67
C8orf31	ENSG00000177335.10	3.34	6.98	-0.879	1.88e-41
C8orf4	ENSG00000176907.4	45.876	24.669	0.869	5.52e-8
C8orf44	ENSG00000213865.7	4.75	8.14	-0.669	5.12e-79
C8orf46	ENSG00000169085.11	0.39	4.05	-1.861	3.92e-156
C8orf82	ENSG00000213563.6	9.72	16.93	-0.742	7.33e-89
C8orf88	ENSG00000253250.2	1.28	8.4	-2.044	1.40e-192
C9orf117	ENSG00000160401.14	0.35	1.43	-0.848	1.05e-156
C9orf139	ENSG00000180539.7	0.49	1.31	-0.633	3.53e-73
C9orf142	ENSG00000148362.10	48.68	75.819	-0.629	4.30e-35
C9orf16	ENSG00000171159.4	121.574	60.778	0.988	1.41e-106
C9orf163	ENSG00000196366.3	0.325	1.01	-0.601	3.56e-97
C9orf172	ENSG00000232434.2	0.84	3	-1.12	1.30e-106
C9orf173	ENSG00000197768.10	0.53	3.51	-1.56	2.67e-126
C9orf173-AS1	ENSG00000275549.1	0.44	3.12	-1.517	2.22e-120
C9orf24	ENSG00000164972.12	0.44	2.28	-1.188	6.20e-62
C9orf72	ENSG00000147894.14	8	17.31	-1.025	1.70e-111
C9orf9	ENSG00000165698.15	10.53	16.97	-0.64	2.41e-62
C9orf91	ENSG00000157693.14	4.805	8.91	-0.772	6.27e-84
CA11	ENSG00000063180.8	42.679	21.83	0.936	2.99e-59
CA12	ENSG00000074410.13	6.615	1.72	1.485	3.35e-41
CA4	ENSG00000167434.9	4.69	65.412	-3.545	2.37e-121
CAB39L	ENSG00000102547.18	4.925	9.39	-0.81	3.40e-76
CABIN1	ENSG00000099991.16	24.585	71.11	-1.495	6.87e-185
CABLES1	ENSG00000134508.12	7.005	12.85	-0.791	5.84e-65
CABP1	ENSG00000157782.9	0.43	1.24	-0.647	9.89e-56
CABP4	ENSG00000175544.13	0.22	0.84	-0.593	1.55e-98
CABYR	ENSG00000154040.20	0.57	1.45	-0.642	1.07e-27
CACNA1A	ENSG00000141837.18	0.21	1.31	-0.933	2.73e-134
CACNA1C	ENSG00000151067.20	1.045	2.69	-0.851	7.16e-74
CACNA1C-AS2	ENSG00000256271.1	0.18	0.78	-0.593	6.28e-95
CACNA1D	ENSG00000157388.13	0.97	3.34	-1.14	8.00e-134
CACNA1H	ENSG00000196557.10	2.425	17.771	-2.454	3.52e-182
CACNA1I	ENSG00000100346.17	2.08	5.01	-0.964	9.14e-51
CACNA2D1	ENSG00000153956.15	4.905	9.09	-0.773	3.47e-58
CACNA2D3	ENSG00000157445.14	0.5	1.49	-0.731	7.80e-33
CACNA2D4	ENSG00000151062.14	1.39	3.26	-0.834	1.39e-99
CACNB1	ENSG00000067191.15	7.145	13.11	-0.793	4.52e-23
CACNB2	ENSG00000165995.18	0.605	2.61	-1.169	1.18e-91
CACNG4	ENSG00000075461.5	0.975	0.08	0.871	2.16e-52
CACTIN	ENSG00000105298.13	10.12	19.44	-0.878	2.16e-119
CADM1	ENSG00000182985.16	67.615	41.76	0.682	1.76e-24
CADM3	ENSG00000162706.12	1.415	2.74	-0.631	6.14e-4
CADM3-AS1	ENSG00000225670.4	0.12	1.15	-0.941	5.40e-100
CAHM	ENSG00000270419.1	0.815	2.96	-1.126	1.83e-137
CALCOCO1	ENSG00000012822.15	83.502	129.068	-0.622	1.29e-48
CALCOCO2	ENSG00000136436.14	46.809	94.851	-1.003	1.07e-101
CALD1	ENSG00000122786.19	76.709	124.663	-0.693	1.04e-58
CALHM2	ENSG00000138172.10	8.995	28.541	-1.563	3.53e-118
CALM2P2	ENSG00000229097.1	1.815	4.33	-0.921	1.62e-56
CALML4	ENSG00000129007.14	2.6	7.24	-1.195	1.03e-132
CALML6	ENSG00000169885.9	0.08	1.01	-0.896	5.46e-164
CAMK1D	ENSG00000183049.12	4.83	7.8	-0.594	1.94e-39
CAMK2B	ENSG00000058404.19	14.445	24.46	-0.721	1.07e-44
CAMK2G	ENSG00000148660.20	8.8	19.53	-1.067	4.63e-141
CAMK2N1	ENSG00000162545.5	66.948	11.23	2.474	2.19e-79
CAMK2N2	ENSG00000163888.3	0.74	0.08	0.688	2.84e-80
CAMSAP3	ENSG00000076826.9	11.415	19.779	-0.743	8.43e-56
CAMTA2	ENSG00000108509.20	33.085	64.78	-0.949	1.92e-91
CAND2	ENSG00000144712.11	1.8	3.86	-0.796	6.65e-81
CAPG	ENSG00000042493.15	406.496	203.431	0.995	8.80e-44
CAPN10	ENSG00000142330.19	11.85	29.761	-1.259	8.61e-120
CAPN10-AS1	ENSG00000260942.1	0.54	2.99	-1.373	4.24e-150
CAPN12	ENSG00000182472.8	1.605	3.03	-0.629	2.38e-11
CAPN15	ENSG00000103326.10	11.12	22.52	-0.957	4.05e-88
CAPN3	ENSG00000092529.22	6.125	19.71	-1.539	2.44e-46
CAPN5	ENSG00000149260.14	3.36	6.27	-0.738	5.10e-21
CAPN6	ENSG00000077274.8	0.28	1.31	-0.852	7.39e-35
CAPN7	ENSG00000131375.9	17.135	27.31	-0.642	1.34e-71
CAPRIN2	ENSG00000110888.17	6.14	26.11	-1.925	5.03e-214
CAPS2	ENSG00000180881.19	2.615	6.1	-0.974	1.29e-124
CARD10	ENSG00000100065.14	5.065	12.24	-1.126	1.31e-82
CARD8	ENSG00000105483.16	15.135	29.85	-0.935	3.99e-110
CARF	ENSG00000138380.17	4.585	7.65	-0.631	1.55e-54
CARKD	ENSG00000213995.11	25.985	39.871	-0.599	1.50e-74
CARNS1	ENSG00000172508.10	13.5	8.31	0.639	4.76e-17
CARS2	ENSG00000134905.16	33.67	51.228	-0.591	6.90e-79
CARTPT	ENSG00000164326.4	0.095	1.98	-1.444	1.23e-9
CASC3	ENSG00000108349.14	36.581	72.268	-0.963	2.08e-130
CASKIN2	ENSG00000177303.9	14.11	24.62	-0.762	8.56e-55
CASP12	ENSG00000204403.9	0.345	1.97	-1.143	1.55e-126
CASP4	ENSG00000196954.12	12.83	29.311	-1.132	6.18e-60
CASP9	ENSG00000132906.17	13.01	26.15	-0.955	2.78e-116
CASQ2	ENSG00000118729.11	0.73	2.79	-1.131	2.24e-87
CASZ1	ENSG00000130940.14	1.385	5.38	-1.42	3.01e-169
CATIP	ENSG00000158428.3	2.745	6.22	-0.947	2.69e-78
CATIP-AS1	ENSG00000225062.1	0.94	3.58	-1.239	7.86e-137
CATSPER1	ENSG00000175294.5	2.635	0.14	1.673	3.83e-99
CATSPER2	ENSG00000166762.16	3	10	-1.459	2.08e-128
CATSPERB	ENSG00000133962.7	0.06	0.85	-0.803	9.95e-140
CAV1	ENSG00000105974.11	111.429	180.355	-0.69	3.85e-18
CBFA2T2	ENSG00000078699.21	6.27	12.11	-0.851	7.53e-115
CBFA2T3	ENSG00000129993.14	1.15	5.25	-1.54	8.15e-145
CBLB	ENSG00000114423.18	7.625	19.34	-1.238	7.26e-161
CBLC	ENSG00000142273.10	0.5	1.82	-0.911	5.64e-103
CBLN1	ENSG00000102924.11	4.435	1.67	1.025	1.89e-23
CBS	ENSG00000274276.4	3.015	6.82	-0.962	1.69e-12
CBWD3	ENSG00000196873.15	10.825	21.83	-0.949	1.54e-80
CBWD5	ENSG00000147996.16	23.471	48.06	-1.003	1.19e-112
CBWD7	ENSG00000215126.10	5.6	11.35	-0.904	4.68e-73
CBX4	ENSG00000141582.14	15.97	9.74	0.66	1.44e-53
CC2D1A	ENSG00000132024.17	25.94	43.54	-0.725	8.70e-72
CC2D1B	ENSG00000154222.14	19.905	34.731	-0.773	8.59e-106
CCAR1	ENSG00000060339.13	31.515	55.888	-0.807	4.92e-98
CCBL1	ENSG00000171097.13	5.68	9.05	-0.589	8.93e-67
CCDC107	ENSG00000159884.11	20.44	31.299	-0.591	7.85e-53
CCDC110	ENSG00000168491.9	1.09	3.13	-0.983	1.44e-79
CCDC114	ENSG00000105479.15	0.675	1.52	-0.589	7.67e-53
CCDC115	ENSG00000136710.9	48.2	30.01	0.666	1.36e-49
CCDC116	ENSG00000161180.10	0.08	0.84	-0.769	1.30e-198
CCDC13	ENSG00000244607.5	2.315	4.79	-0.805	2.29e-85
CCDC13-AS1	ENSG00000173811.10	0.555	1.6	-0.742	2.98e-108
CCDC130	ENSG00000104957.13	21.415	88.101	-1.991	4.57e-195
CCDC136	ENSG00000128596.16	0.63	2.36	-1.044	5.47e-131
CCDC14	ENSG00000175455.14	11.28	34.57	-1.534	1.16e-118
CCDC142	ENSG00000135637.13	2.38	6.88	-1.221	1.28e-159
CCDC144A	ENSG00000170160.16	0.07	0.66	-0.634	2.12e-60
CCDC144B	ENSG00000154874.14	0.22	1.09	-0.777	1.17e-86
CCDC146	ENSG00000135205.14	4.795	22.941	-2.047	1.25e-163
CCDC149	ENSG00000181982.17	5.975	12.38	-0.94	4.30e-111
CCDC150P1	ENSG00000256304.1	0.445	1.25	-0.639	4.15e-53
CCDC151	ENSG00000198003.11	1.47	2.85	-0.64	8.06e-28
CCDC152	ENSG00000198865.9	1.035	2.48	-0.774	8.21e-50
CCDC154	ENSG00000197599.12	2	6.21	-1.265	1.95e-49
CCDC157	ENSG00000187860.10	3.86	6.51	-0.628	7.70e-51
CCDC159	ENSG00000183401.11	39.755	74.501	-0.89	7.77e-102
CCDC162P	ENSG00000203799.10	0.09	0.68	-0.624	1.15e-98
CCDC163P	ENSG00000280670.2	1.36	2.91	-0.728	1.89e-40
CCDC17	ENSG00000159588.14	0.38	3.28	-1.633	6.98e-205
CCDC173	ENSG00000154479.12	0.33	1.06	-0.631	3.42e-77
CCDC174	ENSG00000154781.15	12.23	19.569	-0.637	8.02e-97
CCDC176	ENSG00000119636.15	8.71	13.91	-0.619	1.28e-47
CCDC180	ENSG00000197816.13	1.795	10.06	-1.984	2.94e-190
CCDC183	ENSG00000213213.13	1.735	6.34	-1.424	9.98e-133
CCDC183-AS1	ENSG00000228544.1	1.54	3.96	-0.966	3.76e-95
CCDC24	ENSG00000159214.12	17.27	31.36	-0.825	3.82e-72
CCDC3	ENSG00000151468.10	6.585	15.59	-1.129	1.13e-65
CCDC30	ENSG00000186409.14	4.055	8.64	-0.931	1.38e-98
CCDC36	ENSG00000173421.16	0.175	1.05	-0.803	4.70e-177
CCDC39	ENSG00000145075.11	0.21	2.16	-1.385	1.12e-238
CCDC40	ENSG00000141519.14	2.83	10.12	-1.538	7.52e-161
CCDC50	ENSG00000152492.13	18.81	32.479	-0.757	4.67e-91
CCDC57	ENSG00000176155.18	17.64	70.262	-1.935	7.22e-177
CCDC64	ENSG00000135127.11	10.39	25.801	-1.235	8.13e-74
CCDC65	ENSG00000139537.10	1.3	2.92	-0.769	9.00e-79
CCDC66	ENSG00000180376.16	6.965	19.95	-1.395	3.70e-161
CCDC68	ENSG00000166510.13	0.65	3.44	-1.428	2.97e-160
CCDC69	ENSG00000198624.12	5.4	13.1	-1.14	2.89e-52
CCDC7	ENSG00000216937.11	0.685	2.06	-0.861	3.08e-135
CCDC74B	ENSG00000152076.18	4.23	10.36	-1.119	1.10e-66
CCDC81	ENSG00000149201.9	0.45	1.21	-0.608	1.67e-120
CCDC82	ENSG00000149231.11	13.905	27.11	-0.915	8.89e-105
CCDC84	ENSG00000186166.8	13.15	54.27	-1.966	1.30e-147
CCDC85A	ENSG00000055813.5	1.76	3.53	-0.715	1.74e-30
CCDC85B	ENSG00000175602.3	18.95	30.391	-0.654	1.63e-15
CCDC85C	ENSG00000205476.8	12.85	8.22	0.587	6.09e-29
CCDC88A	ENSG00000115355.15	4.07	6.63	-0.59	2.65e-58
CCDC93	ENSG00000125633.10	8.55	21.459	-1.234	8.50e-132
CCER2	ENSG00000262484.1	0.37	1.11	-0.623	9.30e-55
CCHCR1	ENSG00000204536.13	14.575	22.689	-0.605	1.85e-42
CCL13	ENSG00000181374.7	4.41	1.21	1.292	2.00e-28
CCL14	ENSG00000276409.4	22.106	110.89	-2.276	1.06e-126
CCL17	ENSG00000102970.10	3.005	0.15	1.8	8.00e-60
CCL18	ENSG00000275385.1	19.055	1.32	3.112	9.42e-63
CCL19	ENSG00000172724.11	2.545	18.9	-2.489	1.10e-33
CCL2	ENSG00000108691.9	18.545	38.069	-0.999	4.45e-32
CCL20	ENSG00000115009.11	1.375	0.21	0.973	1.91e-43
CCL21	ENSG00000137077.7	3.35	432.602	-6.639	1.44e-175
CCL22	ENSG00000102962.4	1.015	0.1	0.873	3.85e-40
CCL23	ENSG00000274736.4	0.585	1.85	-0.846	2.86e-40
CCL28	ENSG00000151882.11	10.24	22.25	-1.049	2.38e-79
CCL3	ENSG00000277632.1	6.435	1.76	1.43	7.85e-40
CCL4L2	ENSG00000276070.4	3.075	0.8	1.179	1.10e-18
CCM2	ENSG00000136280.15	44.07	25.88	0.746	2.48e-77
CCM2L	ENSG00000101331.15	3.915	10.35	-1.207	1.21e-75
CCNB2	ENSG00000157456.7	2.185	0.89	0.753	5.29e-56
CCND1	ENSG00000110092.3	139.608	30.6	2.154	4.71e-183
CCND2	ENSG00000118971.7	60.475	23.45	1.33	8.29e-102
CCNG1	ENSG00000113328.18	89.576	49.6	0.84	1.22e-115
CCNI	ENSG00000118816.9	292.257	189.374	0.623	1.51e-23
CCNL1	ENSG00000163660.11	36.39	156.399	-2.074	1.53e-174
CCNL2	ENSG00000221978.11	57.96	310.51	-2.401	2.10e-134
CCNO	ENSG00000152669.8	8.35	13.1	-0.593	4.72e-45
CCNT2	ENSG00000082258.12	9.355	19.02	-0.951	1.39e-94
CCP110	ENSG00000103540.16	4.24	9.94	-1.062	2.27e-126
CCR1	ENSG00000163823.3	2.07	0.86	0.723	9.99e-34
CCR10	ENSG00000184451.5	0.62	2.62	-1.16	4.03e-87
CCR7	ENSG00000126353.3	0.84	2.17	-0.785	2.01e-19
CCS	ENSG00000173992.8	40.99	65.83	-0.67	7.47e-80
CCSER1	ENSG00000184305.14	0.69	1.95	-0.804	8.15e-89
CCT6P1	ENSG00000228409.5	2.08	4.84	-0.923	7.25e-115
CCT6P3	ENSG00000234585.6	3.48	8.01	-1.008	2.12e-99
CCZ1B	ENSG00000146574.15	24.97	46.291	-0.865	2.24e-81
CD151	ENSG00000177697.17	288.234	186.754	0.623	2.33e-35
CD163L1	ENSG00000177675.8	0.78	1.76	-0.633	2.05e-45
CD164L2	ENSG00000174950.10	3.41	0.38	1.676	1.14e-93
CD1A	ENSG00000158477.6	0.9	0.03	0.883	4.97e-52
CD1C	ENSG00000158481.12	1.64	0.46	0.855	2.18e-24
CD1E	ENSG00000158488.15	1.265	0.2	0.916	2.91e-34
CD207	ENSG00000116031.8	1.25	0.07	1.072	3.22e-53
CD22	ENSG00000012124.14	8.875	5.33	0.642	7.49e-6
CD248	ENSG00000174807.3	9.075	29.9	-1.617	2.33e-67
CD27-AS1	ENSG00000215039.6	45.575	77.449	-0.752	1.66e-73
CD276	ENSG00000103855.17	46.655	29.65	0.637	6.61e-36
CD300LF	ENSG00000186074.18	1.2	0.41	0.642	3.91e-39
CD300LG	ENSG00000161649.12	0.15	1.53	-1.138	6.37e-91
CD302	ENSG00000241399.6	8.96	20.49	-1.109	6.65e-86
CD320	ENSG00000167775.10	79.624	50.72	0.64	1.31e-42
CD34	ENSG00000174059.16	33.715	69.43	-1.021	3.13e-59
CD36	ENSG00000135218.17	9.445	85.531	-3.05	1.02e-125
CD38	ENSG00000004468.12	0.59	2.24	-1.027	4.87e-34
CD4	ENSG00000010610.9	12.625	7.58	0.667	5.20e-18
CD44	ENSG00000026508.16	204.13	83.858	1.273	5.64e-88
CD47	ENSG00000196776.14	131.388	65.439	0.995	5.46e-67
CD52	ENSG00000169442.8	49.9	14.44	1.721	1.31e-29
CD55	ENSG00000196352.13	100.384	23.039	2.076	6.08e-85
CD63	ENSG00000135404.11	1915.69	896.897	1.094	2.05e-176
CD68	ENSG00000129226.13	37.104	19.2	0.916	6.18e-18
CD69	ENSG00000110848.8	2.315	6.34	-1.147	1.89e-31
CD72	ENSG00000137101.12	2.145	5.21	-0.982	5.28e-63
CD74	ENSG00000019582.14	1771.62	818.761	1.113	1.60e-32
CD82	ENSG00000085117.11	37.12	16.34	1.136	1.89e-50
CD83	ENSG00000112149.9	10.135	3.87	1.193	3.79e-65
CD86	ENSG00000114013.15	2.46	0.88	0.88	2.57e-35
CD99	ENSG00000002586.17	101.194	165.26	-0.702	2.48e-68
CD99P1	ENSG00000223773.6	2.79	4.8	-0.614	1.11e-70
CDADC1	ENSG00000102543.14	5.695	12.43	-1.004	4.33e-116
CDAN1	ENSG00000140326.12	5.975	12.27	-0.928	2.85e-118
CDC14B	ENSG00000081377.16	6.695	14.29	-0.991	3.45e-95
CDC25B	ENSG00000101224.17	22.149	50.52	-1.154	3.73e-66
CDC37	ENSG00000105401.6	128.27	203.995	-0.665	2.67e-87
CDC42	ENSG00000070831.15	143.419	94.182	0.601	3.56e-41
CDC42BPB	ENSG00000198752.9	31.749	49.9	-0.636	8.08e-49
CDC42EP2	ENSG00000149798.4	10.855	19	-0.754	2.99e-66
CDC42EP5	ENSG00000167617.2	28.64	13.82	1	2.80e-23
CDC42SE1	ENSG00000197622.12	49.506	78.449	-0.654	1.96e-58
CDC45	ENSG00000093009.9	1.43	0.41	0.785	3.30e-73
CDCA3	ENSG00000111665.11	1.665	3.24	-0.67	9.62e-56
CDCA4	ENSG00000170779.10	6.505	3.91	0.612	9.49e-80
CDCP1	ENSG00000163814.7	12.305	7.1	0.716	1.56e-27
CDH1	ENSG00000039068.18	186.243	92.443	1.003	2.84e-56
CDH12P1	ENSG00000254335.1	1.46	5.31	-1.359	1.13e-38
CDH12P2	ENSG00000249230.1	0	2.23	-1.692	1.79e-18
CDH12P3	ENSG00000253492.1	1.46	5.31	-1.359	1.13e-38
CDH13	ENSG00000140945.15	8.325	3.51	1.048	1.74e-53
CDH16	ENSG00000166589.12	0.99	40.85	-4.394	2.39e-147
CDH19	ENSG00000071991.8	0.01	0.78	-0.818	5.67e-145
CDH2	ENSG00000170558.8	12.12	0.75	2.906	1.11e-102
CDH22	ENSG00000149654.9	0.9	0.21	0.651	9.98e-50
CDH23	ENSG00000107736.19	0.575	1.79	-0.825	5.48e-91
CDH24	ENSG00000139880.19	3.97	9.66	-1.101	2.21e-53
CDH26	ENSG00000124215.16	0.25	1.12	-0.762	1.49e-132
CDH3	ENSG00000062038.13	57.984	2.17	4.218	4.44e-183
CDH4	ENSG00000179242.15	1.48	0.19	1.059	1.52e-67
CDH5	ENSG00000179776.17	19.68	40.47	-1.004	4.03e-62
CDH6	ENSG00000113361.12	5.6	2.23	1.031	1.34e-46
CDHR3	ENSG00000128536.15	0.83	4.81	-1.667	2.17e-193
CDK10	ENSG00000185324.21	71.315	158.726	-1.143	2.04e-111
CDK11A	ENSG00000008128.22	16.105	73.878	-2.13	2.62e-162
CDK12	ENSG00000167258.13	13.51	21.35	-0.623	2.77e-62
CDK13	ENSG00000065883.14	15.475	26.891	-0.759	5.84e-98
CDK17	ENSG00000059758.7	8.365	14.08	-0.687	1.00e-73
CDK20	ENSG00000156345.17	6.8	12.41	-0.782	5.90e-110
CDK2AP2P2	ENSG00000237451.3	0.34	1.4	-0.841	6.63e-72
CDK3	ENSG00000250506.6	4.765	19.191	-1.808	1.45e-120
CDK5RAP1	ENSG00000101391.20	25.185	42.739	-0.74	1.94e-102
CDK5RAP3	ENSG00000108465.14	104.184	310.273	-1.565	1.66e-160
CDK7	ENSG00000134058.10	28.151	17.259	0.675	9.31e-90
CDK9	ENSG00000136807.11	43.415	66.981	-0.614	1.61e-62
CDKL1	ENSG00000100490.9	1.705	7.22	-1.604	2.83e-130
CDKN1A	ENSG00000124762.13	144.772	70.849	1.021	1.92e-37
CDKN1C	ENSG00000129757.12	8.615	17.771	-0.965	2.67e-71
CDKN2A	ENSG00000147889.16	3.18	1.27	0.881	2.11e-44
CDKN2B	ENSG00000147883.10	2.955	0.86	1.088	1.39e-76
CDO1	ENSG00000129596.4	4.745	9.55	-0.877	6.45e-25
CDON	ENSG00000064309.14	3.66	18.32	-2.052	9.00e-101
CDR2	ENSG00000140743.7	22.145	40.201	-0.832	7.90e-88
CDRT1	ENSG00000241322.8	0.25	1.93	-1.229	4.68e-150
CDRT4	ENSG00000239704.10	5.18	22.74	-1.942	1.41e-77
CDSN	ENSG00000204539.3	2.458	0	1.79	2.62e-74
CDT1	ENSG00000167513.8	4.25	0.84	1.513	4.13e-151
CEACAM1	ENSG00000079385.21	1.04	4.43	-1.412	1.21e-80
CEACAM19	ENSG00000186567.12	1.73	11	-2.136	1.32e-163
CEACAM6	ENSG00000086548.8	1.4	0.11	1.112	6.49e-49
CEBPA-AS1	ENSG00000267296.2	1.805	4.11	-0.865	4.26e-33
CEBPB	ENSG00000172216.5	33.985	57.591	-0.744	4.16e-64
CEBPD	ENSG00000221869.4	35.05	92.847	-1.38	2.25e-49
CECR2	ENSG00000099954.18	0.085	1.93	-1.433	8.01e-200
CECR7	ENSG00000237438.6	0.69	2.74	-1.146	1.54e-72
CEL	ENSG00000170835.13	0.38	2.11	-1.172	7.11e-110
CELF1	ENSG00000149187.17	20.669	38.03	-0.849	5.46e-90
CELF4	ENSG00000101489.18	2.54	0.53	1.21	4.96e-85
CELF6	ENSG00000140488.14	1.265	15.34	-2.851	6.10e-193
CEMIP	ENSG00000103888.15	1.05	3	-0.964	2.00e-33
CEMP1	ENSG00000205923.3	3.425	7.85	-1	3.53e-43
CENPC	ENSG00000145241.10	6.9	11.46	-0.657	4.33e-72
CENPF	ENSG00000117724.12	1.735	0.55	0.819	5.74e-52
CENPH	ENSG00000153044.9	3.57	1.99	0.612	4.47e-69
CENPJ	ENSG00000151849.14	2.46	23.6	-2.83	1.21e-200
CENPM	ENSG00000100162.14	3.125	0.75	1.237	5.29e-85
CENPT	ENSG00000102901.12	11.05	68.341	-2.525	4.58e-235
CENPU	ENSG00000151725.11	3.17	1.31	0.852	2.15e-75
CENPV	ENSG00000166582.9	9.375	18.98	-0.945	1.07e-68
CEP126	ENSG00000110318.13	1.92	5.21	-1.089	1.25e-150
CEP128	ENSG00000100629.16	2.4	6.01	-1.044	5.93e-122
CEP135	ENSG00000174799.10	1.64	3.01	-0.603	7.53e-90
CEP152	ENSG00000103995.13	0.73	2.93	-1.184	7.16e-186
CEP162	ENSG00000135315.11	4.25	8.5	-0.856	2.43e-115
CEP164	ENSG00000110274.14	10.165	26.57	-1.304	1.90e-134
CEP192	ENSG00000101639.18	8.05	13.57	-0.687	4.81e-81
CEP290	ENSG00000198707.14	4.045	7.42	-0.739	3.50e-105
CEP295	ENSG00000166004.14	5.23	8.94	-0.674	7.22e-97
CEP44	ENSG00000164118.12	4.545	9.16	-0.874	1.09e-121
CEP68	ENSG00000011523.13	5.475	9.91	-0.753	6.84e-90
CEP83	ENSG00000173588.14	7.57	12.06	-0.608	4.09e-64
CEP85	ENSG00000130695.13	4.075	11.44	-1.293	4.64e-143
CEP85L	ENSG00000111860.13	0.76	2.26	-0.889	8.85e-161
CEP95	ENSG00000258890.6	18.355	67.611	-1.826	3.19e-183
CERK	ENSG00000100422.13	15.41	25.84	-0.71	4.65e-48
CERS1	ENSG00000223802.7	2.3	1.14	0.625	1.91e-36
CERS6	ENSG00000172292.14	11.545	6.11	0.819	9.36e-43
CERS6-AS1	ENSG00000227617.8	25.96	12.42	1.006	1.54e-59
CES1	ENSG00000198848.12	4.625	13.55	-1.371	7.84e-24
CES4A	ENSG00000172824.14	7.535	31.65	-1.936	1.04e-102
CFAP221	ENSG00000163075.12	1.3	3.71	-1.034	9.23e-86
CFAP43	ENSG00000197748.12	1.125	5.49	-1.611	2.07e-156
CFAP44	ENSG00000206530.8	2.37	11.06	-1.839	9.47e-137
CFAP46	ENSG00000171811.12	2.38	5.39	-0.919	7.26e-70
CFAP54	ENSG00000188596.9	0.29	1.05	-0.668	8.62e-101
CFAP69	ENSG00000105792.19	2.935	11.7	-1.69	1.04e-179
CFAP70	ENSG00000156042.17	4.46	17.111	-1.73	3.95e-102
CFB	ENSG00000243649.8	60.166	23	1.35	3.15e-7
CFD	ENSG00000197766.7	8.255	246.304	-4.74	2.90e-259
CFH	ENSG00000000971.15	38.584	109	-1.475	1.05e-62
CFI	ENSG00000205403.12	58.86	19.91	1.517	2.02e-40
CFL2	ENSG00000165410.14	19.77	30.22	-0.588	3.84e-46
CFLAR	ENSG00000003402.19	40.086	86.312	-1.088	5.54e-98
CFLAR-AS1	ENSG00000226312.7	0.61	3.18	-1.376	1.52e-124
CFTR	ENSG00000001626.14	0.245	1.08	-0.74	1.34e-79
CGNL1	ENSG00000128849.10	11.49	21.57	-0.854	5.02e-27
CGREF1	ENSG00000138028.14	0.32	1.48	-0.91	4.07e-83
CH17-13I23.3	ENSG00000277702.1	3.01	5.41	-0.677	2.13e-23
CH17-258A22.4	ENSG00000274615.1	2.94	9.99	-1.48	2.48e-73
CH17-262A2.1	ENSG00000275426.1	0.48	1.44	-0.721	2.69e-60
CH17-264B6.3	ENSG00000277125.1	1.355	0.36	0.792	6.57e-23
CH17-264L24.1	ENSG00000279278.1	0.23	1.01	-0.709	2.23e-122
CH17-373J23.1	ENSG00000276216.1	0.515	1.79	-0.881	2.85e-77
CH17-431G21.1	ENSG00000274487.1	3.925	7.69	-0.819	1.85e-63
CH17-472G23.4	ENSG00000275131.1	0.91	3.11	-1.106	6.50e-132
CH507-396I9.7	ENSG00000277277.2	0.71	3.16	-1.283	4.80e-97
CH507-42P11.8	ENSG00000275993.2	6.335	13.93	-1.025	5.62e-13
CH507-513H4.5	ENSG00000281383.1	3.765	0.57	1.602	1.97e-82
CH507-9B2.5	ENSG00000275464.3	6.15	9.83	-0.599	7.65e-17
CH507-9B2.9	ENSG00000280433.1	6.2	10.35	-0.657	6.21e-77
CHAD	ENSG00000136457.9	0.51	3.91	-1.701	6.05e-130
CHCHD10	ENSG00000250479.8	132.628	275.669	-1.05	2.98e-53
CHD1	ENSG00000153922.10	12.62	23.169	-0.827	8.25e-83
CHD2	ENSG00000173575.18	31.425	56.379	-0.823	1.78e-100
CHD3	ENSG00000170004.16	35.779	102.999	-1.5	1.39e-178
CHD4	ENSG00000111642.14	178.848	101.743	0.808	5.95e-123
CHD6	ENSG00000124177.14	9.36	18.01	-0.876	1.03e-84
CHD7	ENSG00000171316.11	4.5	9.41	-0.92	4.98e-89
CHERP	ENSG00000085872.14	20.035	33.76	-0.725	3.04e-106
CHFR	ENSG00000072609.17	8.31	20.619	-1.215	9.88e-149
CHGB	ENSG00000089199.9	1.48	0.6	0.632	1.27e-13
CHI3L1	ENSG00000133048.12	104.202	8.21	3.514	9.58e-47
CHI3L2	ENSG00000064886.13	24.53	9.27	1.314	9.72e-31
CHIA	ENSG00000134216.18	1.455	0.47	0.74	3.11e-43
CHID1	ENSG00000177830.17	104.462	62.66	0.728	5.15e-94
CHIT1	ENSG00000133063.15	10.505	1.09	2.461	3.33e-50
CHKA	ENSG00000110721.11	26.58	87.942	-1.689	5.79e-159
CHKB	ENSG00000100288.19	45.656	141.631	-1.612	2.12e-124
CHKB-CPT1B	ENSG00000254413.8	5.59	14.88	-1.269	9.58e-67
CHL1	ENSG00000134121.9	0.27	1.02	-0.67	8.89e-19
CHMP1B2P	ENSG00000278530.4	0.31	1.41	-0.879	2.40e-132
CHMP2A	ENSG00000130724.8	242.131	156.692	0.625	2.98e-98
CHMP4BP1	ENSG00000258469.1	1.07	2.37	-0.703	3.00e-59
CHMP4C	ENSG00000164695.4	17.865	11.47	0.597	4.99e-30
CHORDC1	ENSG00000110172.11	12.97	21.67	-0.698	1.70e-79
CHPT1	ENSG00000111666.10	82.575	45.809	0.836	7.80e-56
CHRD	ENSG00000090539.15	0.93	15.07	-3.058	4.28e-211
CHRDL1	ENSG00000101938.14	0.66	33.46	-4.376	4.55e-231
CHRFAM7A	ENSG00000166664.13	1	3.36	-1.124	2.05e-80
CHRNA10	ENSG00000129749.3	0.34	1.58	-0.945	6.34e-143
CHRNA4	ENSG00000101204.15	0.15	0.83	-0.67	2.57e-34
CHRNA7	ENSG00000175344.16	0.61	1.91	-0.854	6.07e-47
CHST11	ENSG00000171310.10	5.235	3.03	0.63	1.64e-36
CHST2	ENSG00000175040.5	23.25	7.17	1.57	1.45e-90
CHST7	ENSG00000147119.3	3.195	5.44	-0.618	2.75e-20
CHTF18	ENSG00000127586.16	5.165	10.18	-0.859	1.38e-58
CIART	ENSG00000159208.15	13.38	7.58	0.745	3.14e-19
CICP14	ENSG00000281490.1	3.15	11.58	-1.6	7.26e-128
CIDEB	ENSG00000136305.11	4.235	8.82	-0.907	1.76e-75
CIDEC	ENSG00000187288.10	0.02	0.62	-0.667	7.49e-60
CILP	ENSG00000138615.5	0.34	1.38	-0.829	2.71e-16
CIRBP-AS1	ENSG00000267493.3	0.87	2.27	-0.806	6.80e-128
CITED1	ENSG00000125931.10	278.222	5.61	5.401	1.40e-161
CITED2	ENSG00000164442.9	89.464	164.859	-0.875	4.58e-28
CITF22-1A6.3	ENSG00000273192.1	2.04	4.46	-0.845	6.40e-32
CITF22-49E9.3	ENSG00000278869.1	0.42	1.88	-1.02	1.51e-124
CKB	ENSG00000166165.12	179.793	323.18	-0.842	1.47e-22
CKLF	ENSG00000217555.12	58.444	23.321	1.289	7.38e-130
CKM	ENSG00000104879.4	0.04	2.23	-1.635	2.24e-90
CKMT1B	ENSG00000237289.9	4.455	8.38	-0.782	1.89e-26
CKS1BP3	ENSG00000268942.2	2.48	0	1.799	5.76e-50
CKS2	ENSG00000123975.4	34.309	7.4	2.072	7.50e-159
CLASP2	ENSG00000163539.15	7.375	13.89	-0.83	6.56e-93
CLASRP	ENSG00000104859.14	27.33	129.444	-2.203	2.09e-183
CLCN2	ENSG00000114859.14	2.75	6.76	-1.049	1.26e-154
CLCN5	ENSG00000171365.15	0.98	2.36	-0.763	2.54e-129
CLCN6	ENSG00000011021.21	5.11	18.43	-1.669	3.44e-192
CLCN7	ENSG00000103249.17	49.305	82.939	-0.739	3.01e-60
CLCNKA	ENSG00000186510.11	0.5	29.191	-4.331	4.64e-189
CLCNKB	ENSG00000184908.17	2.39	15.42	-2.276	1.29e-126
CLDN1	ENSG00000163347.5	141.533	5.77	4.396	8.87e-155
CLDN10	ENSG00000134873.9	12.54	0.19	3.508	2.40e-89
CLDN15	ENSG00000106404.13	3.53	10.78	-1.379	1.60e-121
CLDN16	ENSG00000113946.3	23.274	0.28	4.245	2.48e-157
CLDN2	ENSG00000165376.10	2.325	0.19	1.482	4.21e-75
CLDN4	ENSG00000189143.9	333.674	135.673	1.292	2.23e-68
CLDN5	ENSG00000184113.9	16.36	90.427	-2.397	1.80e-135
CLDN7	ENSG00000181885.18	199.901	95.471	1.058	1.37e-83
CLDN9	ENSG00000213937.3	6.385	0.36	2.441	1.58e-128
CLDND1	ENSG00000080822.16	31.535	59.651	-0.899	5.52e-137
CLDND2	ENSG00000160318.6	1.835	3.26	-0.588	8.03e-36
CLEC18A	ENSG00000157322.16	0.275	1.3	-0.851	1.07e-87
CLEC18B	ENSG00000140839.11	0.2	1.43	-1.018	1.97e-115
CLEC1A	ENSG00000150048.10	1.805	7.14	-1.537	3.85e-132
CLEC2B	ENSG00000110852.4	6.62	11.04	-0.66	1.38e-36
CLEC2D	ENSG00000069493.14	3.345	7.22	-0.92	1.77e-55
CLEC4E	ENSG00000166523.7	1.265	6.87	-1.797	1.53e-87
CLHC1	ENSG00000162994.15	3.995	11.24	-1.293	1.41e-135
CLIC1	ENSG00000213719.8	372.771	217.473	0.775	1.19e-112
CLIC4	ENSG00000169504.14	24.401	44.529	-0.842	1.62e-50
CLIC5	ENSG00000112782.15	4.45	8.33	-0.776	5.30e-15
CLK1	ENSG00000013441.15	81.475	241.285	-1.555	2.43e-118
CLK2	ENSG00000176444.18	26.704	97.93	-1.836	1.06e-169
CLK3	ENSG00000179335.18	43.049	81.639	-0.908	8.39e-143
CLK4	ENSG00000113240.12	12.33	37.749	-1.539	2.87e-156
CLMN	ENSG00000165959.11	1.57	11.02	-2.226	7.30e-251
CLMP	ENSG00000166250.11	0.56	2.27	-1.068	4.76e-61
CLN5	ENSG00000102805.13	37.37	66.879	-0.823	1.11e-55
CLSTN2	ENSG00000158258.15	0.14	2.23	-1.503	3.89e-184
CLTA	ENSG00000122705.16	289.535	192.404	0.587	1.02e-87
CLTCL1	ENSG00000070371.15	3	12.02	-1.703	3.85e-207
CLU	ENSG00000120885.19	9679.72	3203.43	1.595	5.10e-34
CLUH	ENSG00000132361.16	12.965	39.439	-1.534	4.32e-192
CLUHP3	ENSG00000131797.12	7.82	17.34	-1.056	4.63e-116
CLUL1	ENSG00000079101.16	2.105	5.58	-1.083	1.28e-55
CMAHP	ENSG00000168405.14	13.405	75.53	-2.409	4.72e-158
CMB9-22P13.1	ENSG00000173727.11	2.68	5.08	-0.724	9.26e-41
CMB9-55F22.1	ENSG00000279672.1	1.25	4.47	-1.282	5.20e-99
CMB9-94B1.2	ENSG00000276505.1	0.32	1.54	-0.944	2.16e-110
CMIP	ENSG00000153815.16	10.505	18.27	-0.744	2.08e-79
CMKLR1	ENSG00000174600.13	1.95	7.96	-1.603	4.63e-111
CMTM3	ENSG00000140931.19	30.185	19.631	0.596	4.01e-23
CMTM6	ENSG00000091317.7	50.289	23.73	1.052	5.79e-77
CMTR1	ENSG00000137200.12	15.4	31.271	-0.977	3.03e-141
CNFN	ENSG00000105427.9	7.135	1.7	1.591	2.15e-122
CNIH1	ENSG00000100528.11	68.595	41.749	0.703	9.65e-40
CNIH3	ENSG00000143786.7	10.325	5.62	0.775	1.11e-70
CNKSR1	ENSG00000142675.17	21.795	39.04	-0.813	8.23e-73
CNKSR3	ENSG00000153721.17	2.55	5.38	-0.846	1.59e-80
CNN1	ENSG00000130176.7	3.865	19.521	-2.077	2.71e-89
CNOT3	ENSG00000088038.17	25.98	53.53	-1.015	2.95e-149
CNR1	ENSG00000118432.12	0.23	3.02	-1.709	4.80e-96
CNRIP1	ENSG00000119865.8	3.84	12.66	-1.497	4.03e-144
CNST	ENSG00000162852.13	6.91	11.36	-0.644	3.44e-65
CNTD1	ENSG00000176563.9	0.51	2.03	-1.005	6.90e-170
CNTD2	ENSG00000105219.8	3.665	1.84	0.716	2.88e-24
CNTFR	ENSG00000122756.14	0.235	11.41	-3.329	2.62e-115
CNTLN	ENSG00000044459.14	1.56	3.02	-0.651	3.45e-107
CNTN1	ENSG00000018236.14	0.09	0.9	-0.802	1.14e-70
CNTN3	ENSG00000113805.8	0.37	1.97	-1.116	2.65e-124
CNTN4	ENSG00000144619.14	6.07	10.93	-0.755	4.32e-36
CNTN5	ENSG00000149972.10	0.15	1.59	-1.171	6.32e-98
CNTN6	ENSG00000134115.12	2.805	4.74	-0.593	1.47e-4
CNTNAP1	ENSG00000108797.11	1.71	6.62	-1.491	4.94e-102
CNTNAP3	ENSG00000106714.17	0.23	1.37	-0.946	1.28e-124
CNTNAP3B	ENSG00000154529.14	0.36	3.98	-1.873	5.05e-176
CNTROB	ENSG00000170037.13	20.08	39.59	-0.945	2.00e-123
COCH	ENSG00000100473.15	0.37	1.19	-0.677	1.32e-84
COG1	ENSG00000166685.11	22.53	34.649	-0.599	1.85e-51
COG7	ENSG00000168434.12	18.96	32.421	-0.744	2.76e-108
COL10A1	ENSG00000123500.9	1.295	0.28	0.842	1.04e-32
COL11A2	ENSG00000204248.10	0.735	4.24	-1.595	2.67e-55
COL12A1	ENSG00000111799.20	3.31	13.92	-1.791	4.62e-72
COL13A1	ENSG00000197467.13	7.665	1.78	1.64	2.80e-86
COL16A1	ENSG00000084636.17	31.075	97.301	-1.616	3.81e-119
COL18A1	ENSG00000182871.14	53.365	115.247	-1.096	1.13e-68
COL23A1	ENSG00000050767.15	14.454	86.629	-2.503	4.87e-118
COL25A1	ENSG00000188517.14	0.32	3.22	-1.677	5.64e-142
COL27A1	ENSG00000196739.14	1.82	19.84	-2.886	4.04e-215
COL28A1	ENSG00000215018.9	0.25	1.44	-0.965	1.98e-121
COL4A2-AS1	ENSG00000232814.2	0.04	0.64	-0.657	3.08e-120
COL4A3	ENSG00000169031.18	9.59	34.64	-1.751	2.88e-129
COL4A4	ENSG00000081052.11	4.32	9.54	-0.986	1.28e-97
COL4A5	ENSG00000188153.12	4.995	14.74	-1.393	1.39e-85
COL4A6	ENSG00000197565.15	0.11	0.92	-0.791	1.51e-116
COL5A1	ENSG00000130635.15	6.115	11.26	-0.785	2.26e-10
COL5A2	ENSG00000204262.11	5.73	9.8	-0.682	1.99e-9
COL5A3	ENSG00000080573.6	2.51	13.06	-2.002	1.19e-89
COL6A1	ENSG00000142156.14	36.289	168.615	-2.185	2.02e-122
COL6A2	ENSG00000142173.14	61.825	203.826	-1.705	6.85e-81
COL6A3	ENSG00000163359.15	11.305	59.721	-2.303	2.12e-76
COL6A4P2	ENSG00000228252.8	0.255	2.11	-1.309	2.26e-85
COL8A1	ENSG00000144810.15	68.707	24.8	1.434	3.52e-64
COL8A2	ENSG00000171812.10	28.874	7.61	1.795	6.89e-38
COL9A2	ENSG00000049089.13	4.54	13.78	-1.416	2.94e-83
COL9A3	ENSG00000092758.15	2.585	25.221	-2.871	1.50e-47
COLCA2	ENSG00000214290.7	4.2	9.74	-1.046	8.49e-60
COLEC11	ENSG00000118004.17	2.705	15.78	-2.179	1.57e-120
COLEC12	ENSG00000158270.11	1.05	7.96	-2.128	4.90e-135
COLGALT1	ENSG00000130309.10	13.25	28.839	-1.066	5.09e-94
COLQ	ENSG00000206561.12	1.255	3.17	-0.887	3.38e-89
COMMD3-BMI1	ENSG00000269897.5	15.05	9.13	0.664	4.40e-18
COMP	ENSG00000105664.10	8.385	3.99	0.911	6.36e-10
COMTD1	ENSG00000165644.10	14.35	29.59	-0.995	6.86e-69
COPG2	ENSG00000158623.14	21.85	11.44	0.877	1.08e-71
COPS7B	ENSG00000144524.17	23.385	42.911	-0.849	2.86e-109
COPZ2	ENSG00000005243.9	19.925	53.772	-1.388	5.67e-92
COQ10A	ENSG00000135469.13	8.54	20.129	-1.147	7.39e-165
COQ6	ENSG00000119723.15	18.46	33.219	-0.814	2.23e-108
COQ9	ENSG00000088682.13	38.764	68.431	-0.804	1.46e-81
CORO1A	ENSG00000102879.15	23.476	13.7	0.736	5.34e-6
CORO2A	ENSG00000106789.12	5.09	1.01	1.599	9.02e-140
CORO2B	ENSG00000103647.12	1.54	7.3	-1.708	9.15e-138
CORO6	ENSG00000167549.18	16.344	165.719	-3.265	8.25e-109
CORO7	ENSG00000262246.5	11.105	25.98	-1.156	3.92e-120
COX10-AS1	ENSG00000236088.9	3.975	6.67	-0.625	3.83e-82
COX19	ENSG00000240230.5	4.715	8.39	-0.716	9.37e-88
COX20P1	ENSG00000213025.2	0.23	0.86	-0.597	4.52e-66
COX6A2	ENSG00000156885.5	0	0.75	-0.807	1.25e-50
COX7C	ENSG00000127184.10	945.117	620.418	0.606	2.42e-65
COX7CP1	ENSG00000235957.1	0.485	6.28	-2.293	3.89e-107
CP	ENSG00000047457.13	2.255	20.369	-2.715	9.66e-133
CPAMD8	ENSG00000160111.12	11.425	21.88	-0.881	7.41e-8
CPD	ENSG00000108582.11	18.905	11.57	0.663	8.96e-40
CPEB3	ENSG00000107864.14	2	3.56	-0.604	1.21e-60
CPEB4	ENSG00000113742.12	9.825	16.14	-0.663	1.88e-43
CPED1	ENSG00000106034.17	0.92	3.46	-1.216	7.53e-124
CPLX1	ENSG00000168993.14	0.67	6.11	-2.09	2.73e-174
CPNE1	ENSG00000214078.11	120.291	186.275	-0.627	2.45e-50
CPNE4	ENSG00000196353.11	1.435	0.14	1.095	8.09e-56
CPNE7	ENSG00000178773.14	0.275	1.38	-0.9	5.97e-87
CPNE8	ENSG00000139117.13	3.26	7.85	-1.055	7.26e-144
CPO	ENSG00000144410.4	0.28	0.93	-0.592	3.75e-129
CPOX	ENSG00000080819.6	5.305	8.69	-0.62	1.52e-61
CPS1	ENSG00000021826.14	0.4	1.55	-0.865	3.27e-57
CPSF1	ENSG00000071894.14	52.625	115.08	-1.114	1.23e-65
CPSF3L	ENSG00000127054.18	63.59	152.862	-1.252	1.94e-149
CPSF4	ENSG00000160917.14	14.91	25.46	-0.734	5.13e-127
CPSF7	ENSG00000149532.15	36.304	88.388	-1.261	8.40e-139
CPT1A	ENSG00000110090.12	9.165	15.62	-0.709	1.20e-47
CPT1B	ENSG00000205560.12	14.07	54.24	-1.874	2.07e-97
CPT1C	ENSG00000169169.14	1.92	5.99	-1.259	5.80e-34
CPVL	ENSG00000106066.13	176.765	89.927	0.967	3.06e-35
CPXM1	ENSG00000088882.7	4.519	13.59	-1.402	5.36e-23
CPXM2	ENSG00000121898.12	2.365	12.12	-1.963	3.64e-124
CRABP1	ENSG00000166426.7	18.769	149.426	-2.928	8.86e-64
CRABP2	ENSG00000143320.8	83.395	9.94	2.948	6.75e-84
CRAMP1L	ENSG00000007545.15	4.54	16.32	-1.645	3.07e-170
CRB3	ENSG00000130545.15	33.59	19.76	0.737	2.48e-72
CREB3L1	ENSG00000157613.10	2.195	4.69	-0.833	1.17e-26
CREBBP	ENSG00000005339.12	15.035	28.551	-0.882	1.46e-86
CREBL2	ENSG00000111269.2	40.846	25.84	0.641	2.64e-35
CREBZF	ENSG00000137504.13	17.49	63.782	-1.809	8.17e-170
CRELD1	ENSG00000163703.17	47.974	96.837	-0.998	2.06e-63
CRELD2	ENSG00000184164.14	35.649	93.662	-1.369	1.34e-73
CRHBP	ENSG00000145708.10	1.395	4.41	-1.176	4.62e-50
CRHR1-IT1	ENSG00000204650.13	8.445	21.05	-1.223	8.30e-127
CRIP1	ENSG00000213145.9	293.882	156.269	0.907	1.82e-15
CRIP3	ENSG00000146215.13	0.71	3.18	-1.29	2.47e-99
CRIPAK	ENSG00000179979.8	2.96	15.009	-2.015	1.95e-196
CRISPLD1	ENSG00000121005.8	4.97	8.64	-0.691	4.34e-24
CRISPLD2	ENSG00000103196.11	4.3	36.44	-2.821	3.00e-155
CRLF2	ENSG00000205755.10	0.585	0.02	0.636	1.19e-53
CRMP1	ENSG00000072832.14	3.385	8.12	-1.056	2.36e-90
CROCC	ENSG00000058453.16	8.27	27.58	-1.624	4.86e-129
CROCCP2	ENSG00000282056.1	2.68	6.64	-1.054	2.27e-115
CROCCP3	ENSG00000080947.14	1.855	8.19	-1.687	4.27e-144
CRTAC1	ENSG00000095713.13	3.025	5.05	-0.588	2.59e-12
CRTC2	ENSG00000160741.16	32.469	60.618	-0.881	8.14e-109
CRTC3	ENSG00000140577.15	16.22	27.739	-0.739	3.80e-95
CRY1	ENSG00000008405.11	11.47	20.93	-0.814	1.55e-77
CRY2	ENSG00000121671.11	19.15	38.91	-0.986	8.70e-93
CRYAB	ENSG00000109846.7	198.156	515.918	-1.376	3.33e-69
CRYBB2P1	ENSG00000100058.12	11.235	24.8	-1.076	4.31e-40
CRYBB3	ENSG00000100053.9	0.395	1.17	-0.637	2.05e-54
CRYBG3	ENSG00000080200.9	13.77	23.42	-0.725	3.11e-31
CRYGN	ENSG00000127377.8	42.43	23.89	0.803	4.65e-17
CRYGS	ENSG00000213139.7	1.425	7.03	-1.727	1.12e-135
CRYZL1	ENSG00000205758.11	20.925	32.43	-0.609	7.21e-92
CSAD	ENSG00000139631.18	12.125	66.329	-2.359	8.43e-128
CSDC2	ENSG00000172346.14	0.12	1.83	-1.337	2.01e-148
CSF1	ENSG00000184371.13	10.79	21.83	-0.953	7.40e-62
CSF2	ENSG00000164400.5	1.35	0	1.233	1.62e-91
CSF3R	ENSG00000119535.17	2.705	6.91	-1.094	5.44e-73
CSGALNACT1	ENSG00000147408.14	15.345	42.929	-1.426	8.13e-70
CSMD1	ENSG00000183117.17	0.805	0.13	0.676	5.13e-41
CSNK1E	ENSG00000213923.10	60.429	103.91	-0.772	1.47e-63
CSNK1G2	ENSG00000133275.15	27.7	48.351	-0.782	5.82e-95
CSNK2B-LY6G5B-1181	ENSG00000263020.5	1.08	8.56	-2.2	1.94e-169
CSPG4	ENSG00000173546.7	2.855	5.08	-0.657	3.71e-17
CSPG4P10	ENSG00000276710.4	0.35	3.11	-1.606	3.00e-187
CSPG4P11	ENSG00000259726.1	0.06	0.63	-0.621	8.14e-155
CSPG4P12	ENSG00000259295.6	0.18	1.87	-1.282	1.44e-199
CSPP1	ENSG00000104218.13	3.16	7.18	-0.976	4.12e-145
CSRNP1	ENSG00000144655.14	19.261	31.749	-0.693	3.01e-19
CSRP2	ENSG00000175183.9	24.955	55.811	-1.13	2.01e-92
CST2	ENSG00000170369.3	1.175	0	1.121	2.34e-49
CST5	ENSG00000170367.4	0.7	0	0.766	1.53e-55
CST6	ENSG00000175315.2	137.333	18.301	2.841	1.79e-42
CTA-204B4.2	ENSG00000259891.1	1.87	5.2	-1.111	9.40e-131
CTA-212A2.1	ENSG00000279805.1	0.27	1.68	-1.077	1.73e-191
CTA-217C2.2	ENSG00000273243.1	0.16	0.88	-0.697	1.27e-109
CTA-223H9.9	ENSG00000273424.1	0.37	2.75	-1.453	8.97e-145
CTA-228A9.3	ENSG00000272720.1	0.4	4.85	-2.063	9.63e-199
CTA-276F8.1	ENSG00000276564.1	0.23	1.05	-0.737	7.87e-142
CTA-292E10.6	ENSG00000226471.6	4.12	7.64	-0.755	1.55e-61
CTA-292E10.8	ENSG00000272858.1	0.41	1.76	-0.969	1.21e-174
CTA-29F11.1	ENSG00000260708.1	6.575	13.78	-0.964	3.36e-76
CTA-363E19.2	ENSG00000272072.1	0.66	2.86	-1.217	7.84e-154
CTA-384D8.35	ENSG00000272666.1	1.215	0.38	0.683	7.52e-26
CTA-384D8.36	ENSG00000272821.1	7.62	14.34	-0.832	1.73e-86
CTA-390C10.10	ENSG00000272977.1	0.65	1.89	-0.809	1.29e-87
CTA-398F10.2	ENSG00000254153.1	0.4	1.79	-0.995	3.45e-51
CTA-984G1.5	ENSG00000237015.1	0.12	0.92	-0.778	2.87e-97
CTAGE15	ENSG00000271079.1	0.47	1.31	-0.652	1.75e-49
CTAGE4	ENSG00000225932.3	3.705	9.33	-1.135	3.41e-56
CTAGE7P	ENSG00000233122.2	0.13	1.16	-0.935	1.31e-182
CTAGE8	ENSG00000244693.1	2.775	6.57	-1.004	1.78e-42
CTB-113D17.1	ENSG00000272568.5	0.41	1.76	-0.969	2.09e-101
CTB-119C2.1	ENSG00000273237.1	0.27	1.23	-0.812	1.53e-148
CTB-129O4.1	ENSG00000248367.1	1.39	2.9	-0.707	2.93e-44
CTB-13F3.1	ENSG00000273055.1	0.74	5.5	-1.901	7.66e-163
CTB-171A8.1	ENSG00000266903.1	0.18	1.34	-0.988	5.74e-76
CTB-191K22.5	ENSG00000267815.1	51.38	23.051	1.123	4.14e-48
CTB-191K22.6	ENSG00000269392.1	0.35	1.36	-0.806	3.56e-70
CTB-31O20.2	ENSG00000261526.2	3.11	7.5	-1.048	4.70e-117
CTB-31O20.4	ENSG00000267244.5	0.37	4.07	-1.888	1.10e-194
CTB-39G8.3	ENSG00000267344.1	0.76	2.59	-1.028	7.55e-83
CTB-50E14.5	ENSG00000269374.1	1.665	4.8	-1.122	4.64e-115
CTB-50L17.14	ENSG00000267385.1	0.17	1.18	-0.898	2.27e-114
CTB-50L17.8	ENSG00000280239.1	0.635	3.29	-1.392	4.72e-164
CTB-50L17.9	ENSG00000267769.1	0.55	3.64	-1.582	2.75e-128
CTB-55O6.12	ENSG00000267169.1	1.31	3.54	-0.975	1.43e-167
CTB-59C6.3	ENSG00000268525.1	0.53	0	0.614	2.94e-14
CTB-63M22.1	ENSG00000229119.3	213.745	39.871	2.393	1.67e-59
CTB-79E8.3	ENSG00000253683.1	0	8.32	-3.22	2.57e-143
CTB-89H12.4	ENSG00000230551.4	3.38	14.83	-1.854	1.29e-158
CTBP1-AS	ENSG00000280927.1	0.29	2.07	-1.251	1.53e-183
CTC-1337H24.4	ENSG00000275484.1	0.81	3.63	-1.355	6.46e-120
CTC-205M6.5	ENSG00000260841.1	0.63	1.57	-0.657	5.89e-105
CTC-246B18.10	ENSG00000269246.1	4.05	7.94	-0.824	1.83e-22
CTC-250I14.3	ENSG00000267512.1	0.885	0.05	0.844	1.40e-12
CTC-251I16.1	ENSG00000279496.1	0.53	2.17	-1.051	3.17e-94
CTC-255N20.1	ENSG00000250343.1	1.455	0.38	0.831	2.07e-65
CTC-260E6.2	ENSG00000224864.4	0.635	3.37	-1.418	2.40e-65
CTC-260E6.4	ENSG00000280079.1	1.16	5.61	-1.614	8.17e-70
CTC-260E6.6	ENSG00000267383.6	1.03	4.69	-1.487	2.32e-144
CTC-260F20.3	ENSG00000258674.5	0.96	3.68	-1.256	5.17e-139
CTC-281F24.1	ENSG00000261996.1	0.48	1.3	-0.636	2.17e-74
CTC-297N7.9	ENSG00000264016.2	0.39	1.09	-0.588	5.70e-61
CTC-301O7.4	ENSG00000197813.5	0.24	2.73	-1.589	6.31e-210
CTC-338M12.1	ENSG00000248514.1	0.19	1.4	-1.012	2.08e-75
CTC-338M12.4	ENSG00000233937.6	5.085	17.68	-1.618	4.79e-150
CTC-366B18.2	ENSG00000248881.1	0.61	0	0.687	3.95e-70
CTC-366B18.4	ENSG00000272040.1	1.18	2.8	-0.802	1.00e-101
CTC-425O23.2	ENSG00000205041.1	0.185	1.09	-0.819	2.01e-142
CTC-425O23.5	ENSG00000279759.1	0.31	1.31	-0.818	5.66e-152
CTC-428H11.2	ENSG00000272367.1	0.59	2.88	-1.287	1.13e-169
CTC-429P9.1	ENSG00000269427.1	4.585	8.02	-0.692	8.98e-35
CTC-429P9.2	ENSG00000268087.1	1.51	4.36	-1.095	1.13e-100
CTC-429P9.3	ENSG00000269044.2	6.455	12.96	-0.905	1.05e-77
CTC-429P9.4	ENSG00000268790.5	7.625	0.94	2.152	1.37e-29
CTC-429P9.5	ENSG00000267904.1	0.685	2.21	-0.93	8.59e-88
CTC-435M10.12	ENSG00000277744.1	1.095	4.65	-1.431	3.89e-125
CTC-439O9.1	ENSG00000278875.1	0.12	1.74	-1.291	9.25e-205
CTC-444N24.6	ENSG00000267871.5	1.17	3.21	-0.956	1.61e-115
CTC-459F4.1	ENSG00000261770.1	0.11	0.77	-0.673	6.23e-138
CTC-471F3.5	ENSG00000269069.1	0.47	1.55	-0.795	2.62e-120
CTC-479C5.10	ENSG00000263126.1	0.41	2.73	-1.403	2.37e-167
CTC-479C5.12	ENSG00000261884.2	0.71	1.91	-0.767	2.46e-93
CTC-487M23.5	ENSG00000270067.1	0.77	1.85	-0.687	1.65e-97
CTC-490E21.11	ENSG00000279108.1	1.11	3.36	-1.047	1.92e-90
CTC-510F12.2	ENSG00000267082.1	0.37	3.03	-1.557	2.60e-159
CTC-510F12.3	ENSG00000279807.1	0.115	1.38	-1.094	2.27e-146
CTC-510F12.7	ENSG00000273733.1	0.76	1.73	-0.633	2.82e-74
CTC-512J14.5	ENSG00000248569.1	0.92	0.14	0.752	1.10e-131
CTC-518B2.12	ENSG00000268739.1	3.655	0	2.219	7.84e-81
CTC-518P12.6	ENSG00000267484.1	1.475	0.25	0.985	1.69e-53
CTC-524C5.2	ENSG00000263272.1	1.6	9.84	-2.06	1.74e-160
CTC-526N19.1	ENSG00000277013.1	0.94	2.13	-0.69	4.87e-66
CTC-529I10.1	ENSG00000275413.1	0.84	4.68	-1.626	2.17e-143
CTC-529I10.2	ENSG00000227782.2	1.055	5.77	-1.72	1.07e-167
CTC-542B22.2	ENSG00000263990.1	0.44	2.62	-1.33	3.54e-146
CTC-550B14.7	ENSG00000267265.5	1.105	4.89	-1.484	9.45e-161
CTC-559E9.5	ENSG00000267481.1	2.965	5.21	-0.647	2.85e-75
CTC-559E9.6	ENSG00000267419.2	1.63	3.27	-0.699	7.47e-73
CTC1	ENSG00000178971.13	13.36	37.219	-1.412	5.73e-141
CTD-2007L18.5	ENSG00000260808.1	0.275	2.39	-1.411	3.75e-156
CTD-2008L17.2	ENSG00000206129.3	0.05	3.13	-1.976	6.42e-219
CTD-2008P7.9	ENSG00000267259.1	5.855	9.49	-0.614	2.57e-17
CTD-2010I16.1	ENSG00000254595.1	0.99	2.36	-0.756	4.78e-95
CTD-2012K14.5	ENSG00000280214.1	0.07	1.27	-1.085	7.56e-185
CTD-2012K14.6	ENSG00000261386.2	0.165	2.96	-1.765	6.64e-179
CTD-2013N17.6	ENSG00000280332.1	0.49	4.67	-1.928	9.38e-202
CTD-2013N24.2	ENSG00000244513.6	1.145	4.76	-1.425	1.37e-162
CTD-2017D11.1	ENSG00000268362.5	1.37	3.48	-0.919	1.90e-108
CTD-2017D11.2	ENSG00000279425.1	0.34	2.24	-1.274	1.09e-184
CTD-2017F17.2	ENSG00000274383.1	3	11.02	-1.587	4.95e-109
CTD-2020K17.3	ENSG00000233175.2	0.95	1.95	-0.597	7.85e-37
CTD-2020K17.4	ENSG00000233483.2	8.425	4.29	0.833	2.75e-53
CTD-2024F21.1	ENSG00000277173.1	0.12	0.89	-0.755	2.10e-157
CTD-2026K11.1	ENSG00000260892.1	0.08	0.78	-0.721	2.49e-42
CTD-2026K11.6	ENSG00000203392.3	0.34	1.69	-1.005	1.84e-123
CTD-2027I19.2	ENSG00000268442.1	0.525	2.2	-1.069	5.27e-161
CTD-2033D15.2	ENSG00000276107.1	0.08	1.26	-1.065	3.62e-89
CTD-2033D15.3	ENSG00000278621.1	0.16	1.6	-1.164	2.62e-99
CTD-2036P10.5	ENSG00000278769.1	0.14	0.89	-0.729	1.40e-77
CTD-2036P10.6	ENSG00000274403.1	0.18	1.54	-1.106	1.01e-154
CTD-2047H16.4	ENSG00000263069.5	0.815	3.42	-1.284	3.39e-187
CTD-2047H16.5	ENSG00000276863.1	0.53	1.83	-0.887	1.78e-105
CTD-2054N24.2	ENSG00000259363.5	1.59	4.32	-1.039	5.00e-90
CTD-2135D7.5	ENSG00000262097.1	0.1	0.78	-0.694	2.90e-125
CTD-2182N23.1	ENSG00000240237.1	235.698	545.675	-1.208	9.98e-33
CTD-2184D3.5	ENSG00000259712.1	0.11	0.93	-0.798	1.42e-136
CTD-2192J16.15	ENSG00000178464.6	9.78	15.64	-0.626	7.49e-45
CTD-2192J16.22	ENSG00000269242.1	2.41	12	-1.931	2.26e-61
CTD-2196E14.6	ENSG00000260751.2	0.71	3.83	-1.498	2.12e-141
CTD-2199O4.6	ENSG00000272417.1	0.22	0.85	-0.601	2.61e-71
CTD-2224J9.4	ENSG00000241434.1	2.35	0	1.744	2.54e-5
CTD-2227E11.1	ENSG00000270933.1	0.8	4.29	-1.555	1.02e-107
CTD-2228K2.7	ENSG00000225138.7	6.875	51.61	-2.74	1.54e-150
CTD-2231H16.1	ENSG00000249430.1	0.295	1.11	-0.704	7.77e-44
CTD-2235C13.1	ENSG00000242198.1	0.795	2.95	-1.138	2.07e-62
CTD-2240E14.4	ENSG00000267387.1	0.15	1.24	-0.962	1.83e-153
CTD-2240J17.2	ENSG00000278029.1	0.09	0.67	-0.616	2.97e-85
CTD-2260A17.1	ENSG00000248734.2	0.39	1.46	-0.824	5.74e-132
CTD-2262B20.1	ENSG00000259630.2	0.29	1.01	-0.64	3.60e-47
CTD-2270P14.1	ENSG00000260565.6	3.17	18.08	-2.194	5.54e-206
CTD-2278I10.4	ENSG00000269815.1	0.18	0.87	-0.664	8.67e-101
CTD-2287O16.5	ENSG00000271918.1	2.135	4.88	-0.907	3.91e-99
CTD-2303H24.2	ENSG00000273018.5	0.68	4.45	-1.698	1.70e-95
CTD-2313J17.5	ENSG00000260361.1	0.35	1.63	-0.962	4.57e-155
CTD-2319I12.4	ENSG00000267248.1	0.82	2.2	-0.814	1.90e-117
CTD-2323K18.1	ENSG00000260269.5	0.87	1.91	-0.638	5.46e-28
CTD-2349P21.10	ENSG00000265791.1	0.145	0.73	-0.595	1.96e-66
CTD-2349P21.12	ENSG00000276250.1	0.875	2.88	-1.049	1.80e-74
CTD-2349P21.9	ENSG00000266490.1	2.47	5.21	-0.84	2.50e-92
CTD-2368P22.1	ENSG00000176593.7	3.34	12.17	-1.601	4.53e-164
CTD-2369P2.10	ENSG00000167807.15	1.46	3.5	-0.871	2.19e-64
CTD-2371O3.3	ENSG00000268403.2	1.475	5.1	-1.301	5.53e-109
CTD-2373N4.3	ENSG00000279041.1	0.94	7.06	-2.055	8.42e-179
CTD-2382E5.6	ENSG00000278493.1	0.27	1.55	-1.006	2.47e-81
CTD-2514C3.1	ENSG00000204556.4	0.31	1.05	-0.646	6.64e-51
CTD-2514K5.4	ENSG00000264272.1	1.18	3.09	-0.908	3.76e-10
CTD-2515H24.2	ENSG00000276772.1	0.18	1.15	-0.866	9.71e-124
CTD-2516F10.2	ENSG00000251364.6	1.875	7.75	-1.606	1.33e-161
CTD-2517M22.14	ENSG00000255182.2	0.89	14.23	-3.01	1.83e-203
CTD-2517M22.17	ENSG00000265393.1	0.735	2.27	-0.914	1.48e-84
CTD-2521M24.6	ENSG00000269481.1	0.42	2	-1.079	3.47e-184
CTD-2527I21.14	ENSG00000271032.1	0.31	2.53	-1.43	2.13e-145
CTD-2528L19.6	ENSG00000267152.1	1.95	3.7	-0.672	8.39e-75
CTD-2537I9.12	ENSG00000267523.1	2.445	30.83	-3.208	2.85e-178
CTD-2537I9.13	ENSG00000267096.1	0.09	0.73	-0.666	1.97e-120
CTD-2537I9.18	ENSG00000276488.1	0.36	2.38	-1.313	5.78e-177
CTD-2545G14.4	ENSG00000279812.1	0	3.85	-2.278	3.73e-14
CTD-2545M3.8	ENSG00000268518.1	1.22	33.831	-3.972	3.23e-122
CTD-2547G23.4	ENSG00000274925.1	0.86	5.14	-1.723	7.54e-155
CTD-2547L16.1	ENSG00000245281.6	1.8	3.27	-0.609	1.27e-36
CTD-2554C21.1	ENSG00000267422.1	1.03	2.2	-0.657	1.20e-51
CTD-2554C21.3	ENSG00000229481.2	2.305	4.07	-0.617	2.19e-43
CTD-2555O16.4	ENSG00000272909.1	1.15	2.32	-0.627	3.39e-109
CTD-2574D22.3	ENSG00000279789.1	0.32	1.7	-1.032	1.46e-160
CTD-2574D22.4	ENSG00000260114.2	1.01	4.5	-1.452	7.35e-220
CTD-2583A14.11	ENSG00000270804.1	2.995	9.4	-1.38	1.20e-145
CTD-2583A14.8	ENSG00000269867.1	1.71	4.07	-0.904	2.37e-106
CTD-2587H24.14	ENSG00000276570.1	1	3.62	-1.208	2.56e-151
CTD-2595P9.4	ENSG00000275155.1	0.22	2.29	-1.431	6.92e-170
CTD-2600H12.2	ENSG00000280067.1	0.25	1.37	-0.923	1.23e-148
CTD-2600O9.2	ENSG00000276166.1	0.52	4.37	-1.821	6.62e-168
CTD-2619J13.13	ENSG00000268307.1	6.93	0.67	2.247	4.60e-120
CTD-2619J13.14	ENSG00000232098.3	2.835	8.02	-1.234	2.19e-131
CTD-2619J13.17	ENSG00000268912.1	1.015	2.19	-0.663	1.04e-108
CTD-2619J13.3	ENSG00000269054.1	0.67	2.16	-0.92	6.84e-126
CTD-2619J13.5	ENSG00000279611.1	0.25	0.88	-0.589	2.15e-78
CTD-2619J13.8	ENSG00000268230.5	0.2	0.95	-0.7	4.58e-111
CTD-2621I17.3	ENSG00000279794.1	0.41	1.65	-0.91	2.30e-107
CTD-2622I13.3	ENSG00000268670.1	0.16	1.14	-0.883	3.58e-160
CTD-2623N2.3	ENSG00000267370.1	0.66	2.35	-1.013	4.21e-147
CTD-2626G11.2	ENSG00000268416.1	2.355	9.16	-1.599	1.90e-113
CTD-2647L4.4	ENSG00000259366.1	1.13	4.9	-1.47	1.19e-164
CTD-2649C14.2	ENSG00000274460.1	0.64	4.36	-1.709	2.89e-134
CTD-2651B20.1	ENSG00000259539.1	0.16	1.54	-1.131	6.59e-93
CTD-3001H11.2	ENSG00000277383.1	0.575	2.82	-1.278	1.31e-114
CTD-3014M21.1	ENSG00000279602.1	0.4	1.26	-0.691	6.16e-86
CTD-3064M3.7	ENSG00000271959.1	0.12	1.02	-0.851	3.94e-92
CTD-3088G3.8	ENSG00000188897.8	0.22	0.94	-0.669	8.98e-107
CTD-3092A11.1	ENSG00000215302.8	1.14	4.59	-1.385	8.50e-146
CTD-3092A11.2	ENSG00000270055.1	4.14	19.569	-2.001	1.28e-166
CTD-3099C6.11	ENSG00000268970.1	0.94	2	-0.629	2.28e-91
CTD-3099C6.9	ENSG00000269825.1	0.35	1.23	-0.724	1.42e-119
CTD-3128G10.6	ENSG00000269680.1	2.125	5.93	-1.149	8.05e-81
CTD-3131K8.2	ENSG00000269439.5	1.83	4.55	-0.972	1.37e-121
CTD-3162L10.1	ENSG00000267053.6	2.435	12.06	-1.927	6.01e-130
CTD-3184A7.4	ENSG00000232442.1	15.615	70.292	-2.101	8.09e-151
CTD-3185P2.1	ENSG00000261351.2	0.99	2.57	-0.843	1.36e-153
CTD-3193K9.11	ENSG00000273650.1	0.23	1.35	-0.934	5.41e-104
CTD-3193O13.11	ENSG00000268120.1	4.415	0.76	1.621	9.78e-86
CTD-3199J23.6	ENSG00000267681.1	1.99	5.18	-1.047	2.48e-73
CTD-3214H19.6	ENSG00000268204.1	1.09	3.18	-1	1.71e-82
CTD-3220F14.1	ENSG00000267605.5	1.185	8.77	-2.161	6.29e-165
CTD-3222D19.12	ENSG00000269399.2	0.43	1.22	-0.635	2.79e-71
CTD-3222D19.8	ENSG00000279529.1	0.465	2.27	-1.158	7.97e-124
CTD-3234P18.6	ENSG00000276071.1	0.22	1.12	-0.797	4.16e-136
CTD-3252C9.4	ENSG00000267519.3	6.17	15.25	-1.18	3.25e-45
CTDSP2	ENSG00000175215.9	49.605	91.461	-0.87	9.61e-87
CTDSPL	ENSG00000144677.14	8.885	14.7	-0.667	2.42e-56
CTGF	ENSG00000118523.5	117.514	190.348	-0.691	2.71e-10
CTGLF12P	ENSG00000265018.6	0.5	2.32	-1.146	1.61e-89
CTH	ENSG00000116761.11	2.04	7.91	-1.551	1.96e-141
CTIF	ENSG00000134030.13	7.705	16.31	-0.992	6.84e-93
CTNND1	ENSG00000198561.12	76.505	121.262	-0.658	7.42e-53
CTPS1	ENSG00000171793.13	6.65	10.59	-0.599	2.15e-35
CTRB2	ENSG00000168928.12	0.05	0.58	-0.59	2.66e-57
CTRL	ENSG00000141086.17	0.25	1.14	-0.776	2.10e-123
CTSB	ENSG00000164733.20	4780.84	1571.58	1.604	2.21e-111
CTSC	ENSG00000109861.15	168.808	46.61	1.835	6.76e-80
CTSD	ENSG00000117984.12	586.484	282.048	1.054	3.05e-123
CTSF	ENSG00000174080.10	26.686	56.379	-1.051	2.81e-69
CTSH	ENSG00000103811.15	505.773	89.411	2.487	4.40e-120
CTSK	ENSG00000143387.12	13.42	31.48	-1.171	3.21e-40
CTSLP2	ENSG00000280913.2	0.545	2.49	-1.176	8.61e-152
CTSS	ENSG00000163131.10	83.702	15.3	2.377	1.38e-111
CTSW	ENSG00000172543.7	4.81	2.79	0.616	1.39e-8
CTTN	ENSG00000085733.15	128.729	203.276	-0.655	2.20e-51
CTTNBP2	ENSG00000077063.10	2.65	5.51	-0.835	2.45e-33
CTU1	ENSG00000142544.6	1.63	3.21	-0.679	4.44e-57
CTXN1	ENSG00000178531.5	16.381	2.56	2.288	6.60e-104
CUBN	ENSG00000107611.14	1.29	3.95	-1.112	1.38e-110
CUEDC1	ENSG00000180891.12	20.355	32.099	-0.632	1.31e-47
CUL9	ENSG00000112659.13	22.975	49.9	-1.086	1.10e-105
CUX2	ENSG00000111249.13	0.02	1.89	-1.502	1.31e-62
CWC25	ENSG00000273559.4	10.365	23.309	-1.097	5.09e-153
CWH43	ENSG00000109182.11	0.655	7.12	-2.295	7.70e-81
CX3CR1	ENSG00000168329.13	2.01	0.43	1.074	7.10e-70
CXADR	ENSG00000154639.18	14.71	6.4	1.086	1.23e-76
CXCL10	ENSG00000169245.5	2.99	0.72	1.214	8.16e-17
CXCL12	ENSG00000107562.16	19.995	91.569	-2.14	3.27e-127
CXCL16	ENSG00000161921.14	39.569	14.46	1.392	1.81e-117
CXCL17	ENSG00000189377.8	10.57	0.55	2.9	1.89e-78
CXCL8	ENSG00000169429.10	3.325	1.47	0.808	1.42e-9
CXCL9	ENSG00000138755.5	3.95	2.27	0.598	2.18e-4
CXorf36	ENSG00000147113.16	7.035	18.89	-1.308	4.79e-88
CXorf40B	ENSG00000197021.8	21.175	34.451	-0.677	7.42e-109
CXorf57	ENSG00000147231.13	1.275	5.19	-1.444	6.14e-199
CXXC1	ENSG00000154832.14	34.684	109.098	-1.625	1.41e-187
CXXC5	ENSG00000171604.11	55.579	27.089	1.01	7.18e-97
CYB561	ENSG00000008283.15	31.324	53.179	-0.745	1.64e-38
CYB5D1	ENSG00000182224.11	11.77	24.19	-0.98	2.73e-99
CYBA	ENSG00000051523.10	272.903	164.095	0.73	8.30e-52
CYBB	ENSG00000165168.7	5.525	2.29	0.988	4.27e-26
CYBRD1	ENSG00000071967.11	102.064	166.467	-0.7	9.97e-45
CYCSP34	ENSG00000176268.5	1.445	3.22	-0.787	8.88e-59
CYGB	ENSG00000161544.9	12.695	50.112	-1.9	6.16e-119
CYP17A1	ENSG00000148795.5	0.63	5.41	-1.975	1.52e-159
CYP17A1-AS1	ENSG00000203886.4	0.805	5.86	-1.926	4.16e-183
CYP19A1	ENSG00000137869.13	0.1	1.58	-1.23	3.50e-100
CYP1A2	ENSG00000140505.6	0.34	1.14	-0.675	1.67e-59
CYP1B1	ENSG00000138061.11	14.489	5.76	1.196	8.80e-11
CYP21A1P	ENSG00000204338.8	0.625	1.71	-0.738	2.19e-43
CYP21A2	ENSG00000231852.6	1.29	2.57	-0.641	1.39e-40
CYP26B1	ENSG00000003137.8	0.975	12.21	-2.742	1.44e-175
CYP27B1	ENSG00000111012.9	1.905	4.47	-0.913	1.46e-40
CYP2C8	ENSG00000138115.13	0.605	1.9	-0.854	1.45e-77
CYP2D6	ENSG00000100197.20	0.82	6.09	-1.962	5.74e-145
CYP2D7	ENSG00000205702.10	1.195	8.72	-2.147	3.20e-143
CYP2D8P	ENSG00000226450.2	0.1	0.93	-0.811	1.33e-155
CYP2E1	ENSG00000130649.9	1.08	4.49	-1.4	2.12e-97
CYP2R1	ENSG00000186104.10	6.905	11.94	-0.711	1.71e-77
CYP2S1	ENSG00000167600.13	6.655	0.56	2.295	3.90e-97
CYP2U1	ENSG00000155016.17	1.67	3.52	-0.76	2.91e-96
CYP46A1	ENSG00000036530.8	0.57	3.58	-1.545	1.64e-163
CYP4F12	ENSG00000186204.14	0.17	3.83	-2.045	8.44e-177
CYP4F29P	ENSG00000228314.1	0.42	2.22	-1.181	3.06e-37
CYP4F32P	ENSG00000223564.1	0.07	2.48	-1.701	1.53e-149
CYP4F35P	ENSG00000265787.1	1.215	3.62	-1.061	8.36e-40
CYP4X1	ENSG00000186377.7	1.36	4.75	-1.285	3.53e-134
CYP51A1	ENSG00000001630.15	24.055	15.38	0.613	1.00e-30
CYP7B1	ENSG00000172817.3	2.25	4.03	-0.63	5.00e-36
CYR61	ENSG00000142871.15	96.095	170.484	-0.821	2.88e-20
CYSLTR2	ENSG00000152207.7	8.225	0.32	2.805	1.50e-116
CYSTM1	ENSG00000120306.9	149.504	81.12	0.874	4.72e-83
CYTH1	ENSG00000108669.16	28.779	49.309	-0.757	2.95e-105
CYTH3	ENSG00000008256.15	11.49	34.64	-1.513	1.10e-155
CYTL1	ENSG00000170891.10	0.9	3.84	-1.349	3.98e-90
CYYR1	ENSG00000166265.11	7.675	13.81	-0.772	1.45e-33
D2HGDH	ENSG00000180902.16	13.61	64.199	-2.158	1.15e-185
DAAM2	ENSG00000146122.16	3.69	17.99	-2.018	6.66e-129
DAB2	ENSG00000153071.14	8.745	26.72	-1.508	7.13e-135
DACT1	ENSG00000165617.14	2.345	9.89	-1.703	1.98e-122
DACT3	ENSG00000197380.10	1.22	3.79	-1.109	2.10e-98
DANCR	ENSG00000226950.6	45.624	75.572	-0.716	4.42e-61
DAPK1	ENSG00000196730.12	4.36	13.91	-1.476	1.12e-120
DAPK2	ENSG00000035664.11	163.143	74.222	1.126	1.61e-19
DAPL1	ENSG00000163331.10	104.872	26.179	1.962	1.79e-86
DARS-AS1	ENSG00000231890.7	1.39	2.78	-0.661	1.23e-55
DAZAP1	ENSG00000071626.16	43.761	67.55	-0.615	3.05e-107
DBF4B	ENSG00000161692.17	3.205	7.42	-1.002	2.16e-103
DBH-AS1	ENSG00000225756.1	0.5	1.64	-0.816	5.25e-74
DBI	ENSG00000155368.16	289.355	157.225	0.876	1.33e-88
DBNDD1	ENSG00000003249.13	11.15	6.36	0.723	2.24e-59
DBP	ENSG00000105516.10	69.367	36.89	0.893	2.82e-47
DCAF15	ENSG00000132017.10	19.065	31.13	-0.679	1.98e-63
DCAF17	ENSG00000115827.13	4.85	11.46	-1.091	4.82e-113
DCAF4	ENSG00000119599.16	11.475	21.19	-0.831	3.44e-97
DCAF5	ENSG00000139990.17	17.79	34.58	-0.921	1.52e-113
DCAF8	ENSG00000132716.18	81.642	165.535	-1.011	3.97e-103
DCBLD1	ENSG00000164465.18	4.64	8.85	-0.804	2.06e-60
DCDC1	ENSG00000170959.14	0.23	1.18	-0.826	6.47e-176
DCDC2	ENSG00000146038.11	7.86	3.63	0.936	9.26e-55
DCHS1	ENSG00000166341.7	2.06	4.34	-0.803	5.20e-59
DCLK1	ENSG00000133083.14	1.07	3.53	-1.13	1.08e-65
DCLK2	ENSG00000170390.14	1.99	5.31	-1.078	3.55e-95
DCN	ENSG00000011465.16	33.03	602.533	-4.149	1.74e-147
DCST2	ENSG00000163354.14	0.91	2.65	-0.934	3.45e-73
DCSTAMP	ENSG00000164935.6	94.382	0.12	6.412	2.76e-109
DCUN1D2	ENSG00000150401.14	3.22	7.56	-1.02	8.14e-155
DCUN1D4	ENSG00000109184.14	9.085	24.729	-1.351	1.15e-166
DCXR	ENSG00000169738.7	61.74	115.711	-0.895	4.13e-48
DDAH1	ENSG00000153904.18	37.825	13.88	1.384	2.58e-132
DDHD1	ENSG00000100523.14	2.745	4.8	-0.631	1.61e-74
DDHD2	ENSG00000085788.13	13.955	26.829	-0.896	4.98e-100
DDIT4	ENSG00000168209.4	58.509	95.663	-0.7	7.16e-16
DDIT4L	ENSG00000145358.6	0.25	1	-0.678	3.11e-60
DDR2	ENSG00000162733.16	2.465	12.85	-1.999	2.74e-149
DDTL	ENSG00000099974.7	1.47	6.04	-1.511	5.67e-221
DDX11	ENSG00000013573.16	6.4	23.72	-1.74	2.42e-107
DDX11L2	ENSG00000236397.3	0.51	1.85	-0.916	1.08e-64
DDX12P	ENSG00000214826.5	0.35	1.1	-0.637	5.84e-95
DDX17	ENSG00000100201.18	128.515	512.851	-1.988	5.79e-182
DDX23	ENSG00000174243.9	38.075	59.738	-0.636	6.70e-88
DDX25	ENSG00000109832.12	0.75	3.96	-1.503	3.09e-131
DDX26B	ENSG00000165359.14	3.315	6.8	-0.854	5.77e-66
DDX31	ENSG00000125485.17	12.62	19.76	-0.608	2.26e-70
DDX39A	ENSG00000123136.14	26.46	64.619	-1.257	1.84e-140
DDX39B	ENSG00000198563.13	276.138	419.549	-0.602	1.97e-89
DDX3Y	ENSG00000067048.16	0	36.319	-5.222	8.31e-37
DDX42	ENSG00000198231.12	45.039	75.682	-0.736	5.27e-106
DDX43	ENSG00000080007.7	0.14	1.52	-1.144	3.88e-71
DDX46	ENSG00000145833.15	15.3	26.46	-0.752	1.61e-79
DDX5	ENSG00000108654.11	351.211	670.409	-0.931	2.22e-93
DDX51	ENSG00000185163.9	11.38	22.811	-0.944	6.24e-133
DDX55	ENSG00000111364.15	8.375	16.42	-0.894	7.15e-113
DDX56	ENSG00000136271.10	45.991	88.089	-0.923	2.57e-97
DDX59	ENSG00000118197.13	10.47	17.91	-0.721	1.80e-111
DDX60	ENSG00000137628.16	12.955	7.64	0.692	2.05e-22
DECR2	ENSG00000242612.6	8.78	13.92	-0.609	3.17e-40
DEFA1	ENSG00000206047.2	0	1.83	-1.501	1.60e-95
DEFA1B	ENSG00000240247.6	0	1.59	-1.373	4.54e-89
DEFA3	ENSG00000239839.5	0	0.69	-0.757	3.68e-66
DEFB109P3	ENSG00000254866.2	0.26	0.97	-0.645	7.34e-38
DEFB124	ENSG00000180383.3	0	1.06	-1.043	9.30e-104
DEFB131	ENSG00000186146.1	1.385	2.88	-0.702	8.45e-12
DEGS1	ENSG00000143753.12	81.729	48.06	0.754	8.59e-68
DEGS2	ENSG00000168350.7	8.035	3.76	0.925	5.25e-53
DENND2A	ENSG00000146966.12	1.01	3.25	-1.08	6.61e-107
DENND3	ENSG00000105339.10	8.06	41.029	-2.214	1.07e-218
DENND4A	ENSG00000174485.14	7.12	11.85	-0.662	4.41e-71
DENND4B	ENSG00000198837.9	10.855	45.86	-1.983	4.60e-205
DENND5A	ENSG00000184014.7	24.465	38.969	-0.65	8.71e-77
DENND6A	ENSG00000174839.12	6.01	12.46	-0.941	5.57e-103
DEPDC1B	ENSG00000035499.12	2.95	0.67	1.242	1.11e-52
DEPDC5	ENSG00000100150.16	5.12	8.98	-0.706	7.78e-98
DEPTOR	ENSG00000155792.9	17.765	37.851	-1.05	7.99e-46
DERL1	ENSG00000136986.9	39.655	23.691	0.719	6.20e-51
DES	ENSG00000175084.11	0.685	43.501	-4.723	1.81e-206
DFFB	ENSG00000169598.15	2.44	5.69	-0.96	1.11e-125
DFFBP1	ENSG00000232303.2	0.16	0.78	-0.618	7.47e-135
DFNB31	ENSG00000095397.13	3.71	15.68	-1.824	4.42e-200
DFNB59	ENSG00000204311.11	1.505	6.15	-1.513	2.35e-158
DGAT1	ENSG00000185000.9	27.205	42.261	-0.617	1.80e-66
DGCR8	ENSG00000128191.13	10.525	28.561	-1.359	3.82e-152
DGKA	ENSG00000065357.19	11.87	24.56	-0.99	8.64e-54
DGKD	ENSG00000077044.9	8.61	28.919	-1.638	6.00e-120
DGKE	ENSG00000153933.9	1.49	4.08	-1.029	3.63e-153
DGKG	ENSG00000058866.14	0.53	2.45	-1.173	2.36e-93
DGKI	ENSG00000157680.15	1.415	7.19	-1.762	1.50e-63
DGKQ	ENSG00000145214.13	4.705	9.64	-0.899	1.64e-110
DGKZ	ENSG00000149091.15	21.525	35.611	-0.701	1.86e-67
DHDH	ENSG00000104808.7	1.265	0.16	0.965	1.09e-99
DHODH	ENSG00000102967.11	3.67	8.24	-0.984	2.93e-150
DHPS	ENSG00000095059.15	50.451	104.589	-1.037	2.39e-148
DHRS3	ENSG00000162496.8	312.247	143.26	1.119	1.34e-34
DHRS9	ENSG00000073737.16	1.33	0.2	0.957	3.88e-43
DHX15	ENSG00000109606.12	41.771	69.041	-0.712	2.41e-109
DHX16	ENSG00000204560.9	19.145	49.159	-1.316	3.60e-172
[truncated: 6,421 more rows]
