# Supplementary material for: Revealing the Protective Role of the TSC1-BRD2-Ferroptosis Axis in Papillary Thyroid Carcinoma: A Multi-Stage Genetic and Functional Integrative Analysis Study
Source: Research Square preprint supplement (doi:10.21203/rs.3.rs-6458091/v1), 2025-05-13
Supplement: Supplementary file 4 [file 6e66f5f76641074ab42e08b0.xlsx]

## Sheet: Sheet1
Table S5. Upstream Regulators Associated with Ferroptosis-Related Proteins and PTC Identified by Mendelian Randomization Analysis
Exposure	Outcome	nsnp	method	b	se	or	or_lci95	or_uci95	pvalue
ADAM23_O75077_OID20651_v1_Inflammation	10074_128_BRD2_BRD2	104	MR Egger	0.0140685213971984	0.00905255047212438	1.01416794876254	0.99633226510331	1.0323229150775	0.123259223087667
ADAM23_O75077_OID20651_v1_Inflammation	10074_128_BRD2_BRD2	104	Weighted median	0.00627786780792118	0.00849631978193522	1.00629761492166	0.989678714864626	1.02319558316007	0.459972216617123
ADAM23_O75077_OID20651_v1_Inflammation	10074_128_BRD2_BRD2	104	Inverse variance weighted	0.0185305158469563	0.00653982531651653	1.01870327128838	1.00572880542883	1.03184511503692	0.00460430522774562
ADAM23_O75077_OID20651_v1_Inflammation	10074_128_BRD2_BRD2	104	Simple mode	0.0187855441297311	0.015144706174317	1.01896310256507	0.989161088963946	1.04966300835443	0.217644395004616
ADAM23_O75077_OID20651_v1_Inflammation	10074_128_BRD2_BRD2	104	Weighted mode	0.0114268311563563	0.00727726201994814	1.0114923667751	0.997167416952518	1.02602310369414	0.119433244690483
ADAM23_O75077_OID20651_v1_Inflammation	7049_2_ADAM23_ADAM_23	104	MR Egger	0.464133151121729	0.0854177463967241	1.59063475114168	1.34543094667462	1.88052676935448	3.77375419678084e-07
ADAM23_O75077_OID20651_v1_Inflammation	7049_2_ADAM23_ADAM_23	104	Weighted median	0.763644117719776	0.0152773791908969	2.14608256574347	2.08277357401574	2.21131592816784	0
ADAM23_O75077_OID20651_v1_Inflammation	7049_2_ADAM23_ADAM_23	104	Inverse variance weighted	0.531175457263964	0.0629408289492759	1.70093050510891	1.50352361878269	1.92425615871102	3.19290633678257e-17
ADAM23_O75077_OID20651_v1_Inflammation	7049_2_ADAM23_ADAM_23	104	Simple mode	0.731305027521937	0.0621776249228096	2.07779041277791	1.83939531171892	2.34708274612124	9.30143791737312e-21
ADAM23_O75077_OID20651_v1_Inflammation	7049_2_ADAM23_ADAM_23	104	Weighted mode	0.780905757328858	0.0138058712330197	2.18344904509654	2.12515820647744	2.24333873967683	2.20064571781429e-79
CASP4_P49662_OID31276_v1_Oncology_II	10074_128_BRD2_BRD2	7	MR Egger	0.0150826806153003	0.0611402285536085	1.0151969982583	0.900547680050474	1.14444239667009	0.814956408258717
CASP4_P49662_OID31276_v1_Oncology_II	10074_128_BRD2_BRD2	7	Weighted median	0.0553503481746573	0.0462838387435467	1.0569108366008	0.965252092736756	1.15727334333669	0.231739755687422
CASP4_P49662_OID31276_v1_Oncology_II	10074_128_BRD2_BRD2	7	Inverse variance weighted	0.0882830596558625	0.0417123251007128	1.09229726356091	1.00654824910354	1.18535133615828	0.0343044977196233
CASP4_P49662_OID31276_v1_Oncology_II	10074_128_BRD2_BRD2	7	Simple mode	0.0968498387809457	0.0846921826363949	1.10169492934605	0.933189641209449	1.30062707915805	0.296374969992299
CASP4_P49662_OID31276_v1_Oncology_II	10074_128_BRD2_BRD2	7	Weighted mode	0.0487615766580223	0.054248851761184	1.04996998354207	0.944059417270188	1.16776226810713	0.403360685131677
CRELD2_Q6UXH1_OID20751_v1_Inflammation	10074_128_BRD2_BRD2	71	MR Egger	0.0212049477404645	0.0169060054684558	1.02143137023848	0.98814006708508	1.05584428651391	0.213970936699879
CRELD2_Q6UXH1_OID20751_v1_Inflammation	10074_128_BRD2_BRD2	71	Weighted median	0.0138742956114247	0.0175149753574264	1.01397099032361	0.979752729404348	1.04938433786544	0.428279613764023
CRELD2_Q6UXH1_OID20751_v1_Inflammation	10074_128_BRD2_BRD2	71	Inverse variance weighted	0.026270161209171	0.0117069068104757	1.02661826344329	1.00333015655222	1.05044690618792	0.0248331580046641
CRELD2_Q6UXH1_OID20751_v1_Inflammation	10074_128_BRD2_BRD2	71	Simple mode	-0.000414838	0.0324687065693542	0.999585248377441	0.937954815230979	1.06526524790828	0.989842419770386
CRELD2_Q6UXH1_OID20751_v1_Inflammation	10074_128_BRD2_BRD2	71	Weighted mode	0.0198241063462771	0.0163577820533005	1.02002190886639	0.98783742291664	1.05325498956647	0.229623009957347
CTBS_Q01459_OID30710_v1_Inflammation_II	10074_128_BRD2_BRD2	97	MR Egger	0.00458178037041875	0.0141592891942583	1.00459229277514	0.977095946588703	1.0328624105203	0.746961010946932
CTBS_Q01459_OID30710_v1_Inflammation_II	10074_128_BRD2_BRD2	97	Weighted median	0.0134916758968882	0.0127379198324748	1.01358309924486	0.988590935701137	1.03920707946426	0.289520458017089
CTBS_Q01459_OID30710_v1_Inflammation_II	10074_128_BRD2_BRD2	97	Inverse variance weighted	0.0221218590235491	0.00975219633699589	1.02236836169012	1.00301208143167	1.04209818239975	0.0233049823161569
CTBS_Q01459_OID30710_v1_Inflammation_II	10074_128_BRD2_BRD2	97	Simple mode	0.0203440655637166	0.0229721089633862	1.02055241656913	0.975620824048977	1.0675533048204	0.378046840386358
CTBS_Q01459_OID30710_v1_Inflammation_II	10074_128_BRD2_BRD2	97	Weighted mode	0.00918279191007199	0.0117073518189092	1.00922508309497	0.98633066786485	1.03265091670819	0.434759404509755
CTSS_P25774_OID21056_v1_Neurology	10074_128_BRD2_BRD2	73	MR Egger	-0.00899506	0.0193988574063871	0.991045271298356	0.954071346376776	1.02945207765936	0.644288045189978
CTSS_P25774_OID21056_v1_Neurology	10074_128_BRD2_BRD2	73	Weighted median	0.017405248192105	0.0151938383208711	1.01755760216041	0.987701576519851	1.04831610916602	0.251982847916494
CTSS_P25774_OID21056_v1_Neurology	10074_128_BRD2_BRD2	73	Inverse variance weighted	0.025647132151215	0.0120814978696406	1.02597884964111	1.00196933292068	1.05056369025041	0.0337669479780036
CTSS_P25774_OID21056_v1_Neurology	10074_128_BRD2_BRD2	73	Simple mode	-0.00694061	0.0275869319684258	0.993083418961749	0.94081289255294	1.04825803815317	0.802074279947245
CTSS_P25774_OID21056_v1_Neurology	10074_128_BRD2_BRD2	73	Weighted mode	0.00717794886415773	0.0141508078556048	1.00720377208806	0.979652233048626	1.03553016497647	0.61353199903182
DDR1_Q08345_OID21009_v1_Neurology	10074_128_BRD2_BRD2	140	MR Egger	0.0239748844063463	0.0219185663030359	1.02426459255427	0.981193584003432	1.06922626958055	0.275941168726653
DDR1_Q08345_OID21009_v1_Neurology	10074_128_BRD2_BRD2	140	Weighted median	0.0164491438971999	0.014967528849384	1.0165851759112	0.987195471905058	1.04684983804484	0.271773029053583
DDR1_Q08345_OID21009_v1_Neurology	10074_128_BRD2_BRD2	140	Inverse variance weighted	0.0242044391495369	0.012037225940385	1.02449974433884	1.00061166329613	1.04895811697103	0.0443467158126414
DDR1_Q08345_OID21009_v1_Neurology	10074_128_BRD2_BRD2	140	Simple mode	0.0213858218476423	0.0332758400906967	1.02161613743491	0.957112035656176	1.09046746189111	0.521488398336366
DDR1_Q08345_OID21009_v1_Neurology	10074_128_BRD2_BRD2	140	Weighted mode	0.00278569842732956	0.0195351524514533	1.00278958209059	0.965119645477841	1.04192982772779	0.886813171266238
DDR1_Q08345_OID21009_v1_Neurology	7049_2_ADAM23_ADAM_23	140	MR Egger	-0.00318218	0.0200920034060451	0.99682287893897	0.958330562716325	1.03686127797044	0.874388617170821
DDR1_Q08345_OID21009_v1_Neurology	7049_2_ADAM23_ADAM_23	140	Weighted median	0.018976011452017	0.0155419729702199	1.01915720022277	0.988579459616101	1.05068074059446	0.22210398791726
DDR1_Q08345_OID21009_v1_Neurology	7049_2_ADAM23_ADAM_23	140	Inverse variance weighted	0.0449388751152329	0.0113108377337532	1.04596392353039	1.02303084001475	1.06941109352217	7.09488923917122e-05
DDR1_Q08345_OID21009_v1_Neurology	7049_2_ADAM23_ADAM_23	140	Simple mode	0.0375756231664054	0.0343589518316981	1.03829051292922	0.970670778331964	1.11062083386436	0.27601346360921
DDR1_Q08345_OID21009_v1_Neurology	7049_2_ADAM23_ADAM_23	140	Weighted mode	0.0220434321602084	0.0191451116312823	1.02228818369043	0.984638227857703	1.06137777403469	0.251549724188182
DPP6_P42658_OID21354_v1_Oncology	7049_2_ADAM23_ADAM_23	46	MR Egger	-0.00362847	0.0512043844440014	0.996378105053905	0.901235153817067	1.10156525078506	0.943828311751044
DPP6_P42658_OID21354_v1_Oncology	7049_2_ADAM23_ADAM_23	46	Weighted median	0.0140176684969259	0.0271645165449105	1.01411637669229	0.961534547336989	1.06957366048238	0.605834407134996
DPP6_P42658_OID21354_v1_Oncology	7049_2_ADAM23_ADAM_23	46	Inverse variance weighted	0.0664937429699982	0.0263958709844359	1.06875427682668	1.01486727037611	1.12550255346396	0.0117656447204157
DPP6_P42658_OID21354_v1_Oncology	7049_2_ADAM23_ADAM_23	46	Simple mode	0.00787673221694823	0.046151023199341	1.00790783528203	0.920738445031254	1.10332984345888	0.865246004918684
DPP6_P42658_OID21354_v1_Oncology	7049_2_ADAM23_ADAM_23	46	Weighted mode	0.0115840521017327	0.0279033107422713	1.01165140706315	0.957809438323127	1.06852002962575	0.680005088156019
ENTPD6_O75354_OID20100_v1_Cardiometabolic	10074_128_BRD2_BRD2	111	MR Egger	0.0162886156739223	0.0114683152440583	1.01642199839675	0.993829831948046	1.0395277396733	0.158370207802747
ENTPD6_O75354_OID20100_v1_Cardiometabolic	10074_128_BRD2_BRD2	111	Weighted median	0.0200092169388005	0.0107406160939001	1.02021074320341	0.998958152495119	1.04191547758827	0.06246948216144
ENTPD6_O75354_OID20100_v1_Cardiometabolic	10074_128_BRD2_BRD2	111	Inverse variance weighted	0.0166742403638916	0.00727603921325177	1.01681403139871	1.00241611762515	1.03141874543952	0.0219250136086411
ENTPD6_O75354_OID20100_v1_Cardiometabolic	10074_128_BRD2_BRD2	111	Simple mode	0.0455909861754068	0.0185559046336353	1.04664623061929	1.00926406131469	1.08541299949052	0.0155746911635678
ENTPD6_O75354_OID20100_v1_Cardiometabolic	10074_128_BRD2_BRD2	111	Weighted mode	0.0173364459694869	0.0108622195497596	1.01748759434411	0.996054300461436	1.03938209409322	0.113350779913955
ERBB4_Q15303_OID21510_v1_Oncology	7049_2_ADAM23_ADAM_23	82	MR Egger	0.0847098277921084	0.11819928485096	1.08840119709389	0.863327844658082	1.37215215884133	0.475665102738789
ERBB4_Q15303_OID21510_v1_Oncology	7049_2_ADAM23_ADAM_23	82	Weighted median	0.0839810245167367	0.0255559125498972	1.08760825572076	1.03447229409768	1.14347356102345	0.00101560382542974
ERBB4_Q15303_OID21510_v1_Oncology	7049_2_ADAM23_ADAM_23	82	Inverse variance weighted	0.109105523282384	0.050325132381492	1.11528003214202	1.01052324778305	1.23089652100884	0.0301577245795986
ERBB4_Q15303_OID21510_v1_Oncology	7049_2_ADAM23_ADAM_23	82	Simple mode	0.0959047740974235	0.0490928100934029	1.10065424820926	0.999682916595926	1.21182402338756	0.0542079472736428
ERBB4_Q15303_OID21510_v1_Oncology	7049_2_ADAM23_ADAM_23	82	Weighted mode	0.0880529926636993	0.0327393847297559	1.09204599092081	1.02417	1.16441892613057	0.00868641473917429
FLT3LG_P49771_OID20661_v1_Inflammation	7049_2_ADAM23_ADAM_23	88	MR Egger	0.0103666971636013	0.0205072849221215	1.01042061753295	0.970612870947222	1.05186099926669	0.614491825638693
FLT3LG_P49771_OID20661_v1_Inflammation	7049_2_ADAM23_ADAM_23	88	Weighted median	0.00125031045639655	0.0218041560296774	1.00125109242038	0.959362924273983	1.04496820203019	0.954272159904851
FLT3LG_P49771_OID20661_v1_Inflammation	7049_2_ADAM23_ADAM_23	88	Inverse variance weighted	0.0274363650003013	0.0132663051926791	1.0278162079421	1.00143543607618	1.05489192737945	0.0386283584766939
FLT3LG_P49771_OID20661_v1_Inflammation	7049_2_ADAM23_ADAM_23	88	Simple mode	-0.00411194	0.0499823683718957	0.995896497730647	0.902959671852974	1.09839881570443	0.934622655440262
FLT3LG_P49771_OID20661_v1_Inflammation	7049_2_ADAM23_ADAM_23	88	Weighted mode	0.00714938080169492	0.0208849960325062	1.00717499863879	0.966779135454072	1.04925876105777	0.732934662268586
FST_P19883_OID20770_v1_Inflammation	7049_2_ADAM23_ADAM_23	19	MR Egger	-0.262345	0.112872572667354	0.769245941094149	0.616575324076971	0.959719428888388	0.0327591284930252
FST_P19883_OID20770_v1_Inflammation	7049_2_ADAM23_ADAM_23	19	Weighted median	-0.100375	0.0487799225422566	0.904498474720796	0.822025955283247	0.995245327126376	0.0396185192796721
FST_P19883_OID20770_v1_Inflammation	7049_2_ADAM23_ADAM_23	19	Inverse variance weighted	-0.112759	0.0466956569183876	0.893365939981832	0.815232049958611	0.978988378536078	0.0157454046214478
FST_P19883_OID20770_v1_Inflammation	7049_2_ADAM23_ADAM_23	19	Simple mode	0.018127708604009	0.0829320536198058	1.01829301286537	0.865524916264508	1.19802519900369	0.829432461075821
FST_P19883_OID20770_v1_Inflammation	7049_2_ADAM23_ADAM_23	19	Weighted mode	-0.0674597	0.0556194184450236	0.934765377652221	0.838220761770592	1.04242981217929	0.240853672759786
ICAM3_P32942_OID20277_v1_Cardiometabolic	10074_128_BRD2_BRD2	181	MR Egger	-0.00314311	0.0233354864960083	0.996861825631543	0.952294767588966	1.04351460621526	0.893006546531089
ICAM3_P32942_OID20277_v1_Cardiometabolic	10074_128_BRD2_BRD2	181	Weighted median	0.0315408590711014	0.0167727006212689	1.03204354307468	0.998667254748235	1.06653529465193	0.0600416260769849
ICAM3_P32942_OID20277_v1_Cardiometabolic	10074_128_BRD2_BRD2	181	Inverse variance weighted	0.0442208233590801	0.0120004904229703	1.04521313688232	1.02091559021885	1.0700889593401	0.000228776268572101
ICAM3_P32942_OID20277_v1_Cardiometabolic	10074_128_BRD2_BRD2	181	Simple mode	0.0327486908841248	0.0304642218948305	1.03329083120394	0.973399024218618	1.09686769278119	0.283818682329961
ICAM3_P32942_OID20277_v1_Cardiometabolic	10074_128_BRD2_BRD2	181	Weighted mode	0.0327486908841248	0.0173783559046876	1.03329083120394	0.998687974769626	1.06909	0.0611156410533717
ICAM3_P32942_OID20277_v1_Cardiometabolic	7049_2_ADAM23_ADAM_23	181	MR Egger	0.00541114829857372	0.0208404459946617	1.00542581500417	0.965184382592213	1.04734503345553	0.795434874168424
ICAM3_P32942_OID20277_v1_Cardiometabolic	7049_2_ADAM23_ADAM_23	181	Weighted median	0.0277053014025813	0.0165246241618618	1.02809266230792	0.995327986015357	1.06193590167481	0.0936193468544155
ICAM3_P32942_OID20277_v1_Cardiometabolic	7049_2_ADAM23_ADAM_23	181	Inverse variance weighted	0.0438166080978099	0.0107025256104693	1.04479073115828	1.0231024799959	1.0669387409936	4.23914266124603e-05
ICAM3_P32942_OID20277_v1_Cardiometabolic	7049_2_ADAM23_ADAM_23	181	Simple mode	0.0356969253507794	0.0318173040611179	1.0363417099897	0.973687381307966	1.10302768679373	0.263384770156984
ICAM3_P32942_OID20277_v1_Cardiometabolic	7049_2_ADAM23_ADAM_23	181	Weighted mode	0.0301408875157789	0.0196305669759473	1.03059972236031	0.99169961624488	1.0710257121516	0.126440029477719
IL15_P40933_OID20562_v1_Inflammation	7049_2_ADAM23_ADAM_23	87	MR Egger	-0.0162756	0.0437374344234848	0.983856177136385	0.903028715888952	1.07191826822089	0.71072998214196
IL15_P40933_OID20562_v1_Inflammation	7049_2_ADAM23_ADAM_23	87	Weighted median	-0.0111123	0.0234897402773596	0.988949215671059	0.944450323675382	1.03554472549745	0.636163044329424
IL15_P40933_OID20562_v1_Inflammation	7049_2_ADAM23_ADAM_23	87	Inverse variance weighted	-0.0378907	0.016347606313698	0.962818181779251	0.93245722731048	0.994167693716673	0.0204595044220613
IL15_P40933_OID20562_v1_Inflammation	7049_2_ADAM23_ADAM_23	87	Simple mode	-0.0210447	0.051069383873872	0.979175198337872	0.885909313632325	1.0822598366292	0.681305784715301
IL15_P40933_OID20562_v1_Inflammation	7049_2_ADAM23_ADAM_23	87	Weighted mode	-0.0162593	0.040500280039952	0.983872208262013	0.908791295665105	1.06515602295897	0.689077011983139
ITGBL1_O95965_OID30408_v1_Cardiometabolic_II	10074_128_BRD2_BRD2	80	MR Egger	-0.0236308	0.016024041253103	0.976646182527872	0.946449219835714	1.00780659527812	0.144315123701463
ITGBL1_O95965_OID30408_v1_Cardiometabolic_II	10074_128_BRD2_BRD2	80	Weighted median	-0.0175902	0.0134576276122111	0.982563593279698	0.956985382951354	1.00882545547489	0.191185153123979
ITGBL1_O95965_OID30408_v1_Cardiometabolic_II	10074_128_BRD2_BRD2	80	Inverse variance weighted	-0.0195883	0.00924692249622391	0.980602314068335	0.962989993685622	0.998536749770311	0.0341447813191361
ITGBL1_O95965_OID30408_v1_Cardiometabolic_II	10074_128_BRD2_BRD2	80	Simple mode	-0.0183358	0.0223506127865756	0.981831280066024	0.939748494077171	1.02579857120465	0.414473051657565
ITGBL1_O95965_OID30408_v1_Cardiometabolic_II	10074_128_BRD2_BRD2	80	Weighted mode	-0.0203458	0.0131123245560867	0.979859816481088	0.95499810949827	1.00536875456096	0.124742691628311
ITIH4_Q14624_OID30762_v1_Inflammation_II	10074_128_BRD2_BRD2	43	MR Egger	0.0151052523148847	0.0303054369386888	1.01521991323857	0.95667322445894	1.07734955456608	0.620841848386886
ITIH4_Q14624_OID30762_v1_Inflammation_II	10074_128_BRD2_BRD2	43	Weighted median	0.0387553552405213	0.0249577158655179	1.03951614036342	0.989889688463863	1.09163053082505	0.120461213241895
ITIH4_Q14624_OID30762_v1_Inflammation_II	10074_128_BRD2_BRD2	43	Inverse variance weighted	0.0688398451461524	0.0187752902229122	1.07126462717907	1.03255909213694	1.11142104135665	0.000245880452083162
ITIH4_Q14624_OID30762_v1_Inflammation_II	10074_128_BRD2_BRD2	43	Simple mode	0.103858160632201	0.0464758298316105	1.10944308104972	1.01284736141227	1.21525117898597	0.0308160178937068
ITIH4_Q14624_OID30762_v1_Inflammation_II	10074_128_BRD2_BRD2	43	Weighted mode	0.0452761007455325	0.0240181429870828	1.04631670885456	0.998202158547425	1.09675043862993	0.0663502042691161
KDM3A_Q9Y4C1_OID30426_v1_Inflammation_II	10074_128_BRD2_BRD2	18	MR Egger	0.412515595681066	0.086220617938322	1.5106131011641	1.27573589482466	1.78873382074294	0.00020266588388638
KDM3A_Q9Y4C1_OID30426_v1_Inflammation_II	10074_128_BRD2_BRD2	18	Weighted median	0.196840814681108	0.0515341497839056	1.21755020916044	1.10057622230137	1.34695669576322	0.000133657997093522
KDM3A_Q9Y4C1_OID30426_v1_Inflammation_II	10074_128_BRD2_BRD2	18	Inverse variance weighted	0.223635686732521	0.0464260925520653	1.25061532067102	1.14183948502011	1.36975354313442	1.45713836188238e-06
KDM3A_Q9Y4C1_OID30426_v1_Inflammation_II	10074_128_BRD2_BRD2	18	Simple mode	0.312269852581476	0.120192051487433	1.36652340314654	1.07971102044094	1.72952408190165	0.0187539633739454
KDM3A_Q9Y4C1_OID30426_v1_Inflammation_II	10074_128_BRD2_BRD2	18	Weighted mode	0.269061235807843	0.0651823944717694	1.30873528005488	1.1517744378711	1.4870863399488	0.000703123593485904
LTB_Q06643_OID31383_v1_Oncology_II	10074_128_BRD2_BRD2	77	MR Egger	-0.066453	0.0451476320424278	0.935706894200346	0.856464544758013	1.02228095396691	0.145230599747742
LTB_Q06643_OID31383_v1_Oncology_II	10074_128_BRD2_BRD2	77	Weighted median	-0.0941282	0.0213235430685939	0.910166109060249	0.872910452277219	0.949011830389664	1.01345203144841e-05
LTB_Q06643_OID31383_v1_Oncology_II	10074_128_BRD2_BRD2	77	Inverse variance weighted	-0.0821871	0.0173230222270153	0.921099583268389	0.890350345592642	0.952910780005893	2.09138567354847e-06
LTB_Q06643_OID31383_v1_Oncology_II	10074_128_BRD2_BRD2	77	Simple mode	-0.114194	0.0409520470127854	0.892085211468826	0.823279409623693	0.966641477023133	0.0066881285006368
LTB_Q06643_OID31383_v1_Oncology_II	10074_128_BRD2_BRD2	77	Weighted mode	-0.0972197	0.0298864596681641	0.907356655971219	0.85573276575387	0.962094866625773	0.00170495817321813
MFAP3L_O75121_OID30933_v1_Neurology_II	10074_128_BRD2_BRD2	3	MR Egger	-0.125773	0.0952547545119317	0.881815093413951	0.731635961959592	1.06282071877653	0.412651750878538
MFAP3L_O75121_OID30933_v1_Neurology_II	10074_128_BRD2_BRD2	3	Weighted median	-0.190572	0.0822595288831197	0.826486188054485	0.703420264614819	0.971082940607172	0.0205191368295274
MFAP3L_O75121_OID30933_v1_Neurology_II	10074_128_BRD2_BRD2	3	Inverse variance weighted	-0.182079	0.0699322684978572	0.833535884128833	0.726769599195386	0.955986699085425	0.00922393028810689
MFAP3L_O75121_OID30933_v1_Neurology_II	10074_128_BRD2_BRD2	3	Simple mode	-0.260957	0.113345843704211	0.770313851777659	0.616858818140455	0.961943661645804	0.147913703837865
MFAP3L_O75121_OID30933_v1_Neurology_II	10074_128_BRD2_BRD2	3	Weighted mode	-0.135119	0.0929054112362332	0.873611550488351	0.728174866502783	1.0480959674042	0.283063315485072
MME_P08473_OID21307_v1_Oncology	7049_2_ADAM23_ADAM_23	84	MR Egger	-0.0160519	0.0307384195123711	0.984076197835614	0.92653889798201	1.0451865164601	0.602931182073961
MME_P08473_OID21307_v1_Oncology	7049_2_ADAM23_ADAM_23	84	Weighted median	-0.0194174	0.0198364603879107	0.980769950078602	0.943369899725627	1.01965273140149	0.327643308558011
MME_P08473_OID21307_v1_Oncology	7049_2_ADAM23_ADAM_23	84	Inverse variance weighted	-0.0479012	0.018537064771667	0.953227995685851	0.919216308148047	0.988498140976108	0.00976405847675054
MME_P08473_OID21307_v1_Oncology	7049_2_ADAM23_ADAM_23	84	Simple mode	-0.0322897	0.0386589997062818	0.968226038100584	0.897572530502417	1.0444411220241	0.405978042622564
MME_P08473_OID21307_v1_Oncology	7049_2_ADAM23_ADAM_23	84	Weighted mode	-0.015911	0.024599758010629	0.984214894318385	0.937886309131094	1.03283196349842	0.519548881024973
MST1_P26927_OID30713_v1_Inflammation_II	7049_2_ADAM23_ADAM_23	186	MR Egger	-0.010093	0.00578205316874866	0.989957722897445	0.978802038151028	1.00124055215042	0.0825530434093109
MST1_P26927_OID30713_v1_Inflammation_II	7049_2_ADAM23_ADAM_23	186	Weighted median	-0.0122334	0.00669780904519699	0.987841106121872	0.974957768131161	1.00089468779206	0.0677779087840655
MST1_P26927_OID30713_v1_Inflammation_II	7049_2_ADAM23_ADAM_23	186	Inverse variance weighted	-0.0130171	0.004369902421276	0.987067247426461	0.97864910999241	0.995557795939351	0.00289370219950946
MST1_P26927_OID30713_v1_Inflammation_II	7049_2_ADAM23_ADAM_23	186	Simple mode	-0.0150089	0.0111655327965322	0.98510321214057	0.963778961530272	1.00689927598008	0.180525408427911
MST1_P26927_OID30713_v1_Inflammation_II	7049_2_ADAM23_ADAM_23	186	Weighted mode	-0.0115419	0.00645076097242185	0.98852442302534	0.976104702642717	1.00110216892916	0.0752128629352683
PDIA5_Q14554_OID31209_v1_Oncology_II	7049_2_ADAM23_ADAM_23	96	MR Egger	-0.0297327	0.0320504490686798	0.970704970535459	0.911602191240197	1.03363961701357	0.355947277549719
PDIA5_Q14554_OID31209_v1_Oncology_II	7049_2_ADAM23_ADAM_23	96	Weighted median	-0.0140565	0.017033849265462	0.986041794064419	0.953664942678523	1.01951783706233	0.409251209527129
PDIA5_Q14554_OID31209_v1_Oncology_II	7049_2_ADAM23_ADAM_23	96	Inverse variance weighted	-0.0320939	0.012652576000564	0.968415670780704	0.944695221089361	0.992731719688596	0.0111951253628607
PDIA5_Q14554_OID31209_v1_Oncology_II	7049_2_ADAM23_ADAM_23	96	Simple mode	-0.0133827	0.0403502102893809	0.986706439721717	0.911677360589559	1.06791025013357	0.740873584993008
PDIA5_Q14554_OID31209_v1_Oncology_II	7049_2_ADAM23_ADAM_23	96	Weighted mode	0.00464896880600141	0.0264358944940773	1.00465979202725	0.953929619463673	1.0580878055592	0.860779662287146
PECR_Q9BY49_OID30228_v1_Cardiometabolic_II	10074_128_BRD2_BRD2	17	MR Egger	0.0538105507710043	0.0324987631852818	1.05528466035099	0.990161690876112	1.12469076983453	0.118533090844692
PECR_Q9BY49_OID30228_v1_Cardiometabolic_II	10074_128_BRD2_BRD2	17	Weighted median	0.0682901033816548	0.026479411438108	1.07067587011968	1.01652551739444	1.12771081418089	0.00990900226111736
PECR_Q9BY49_OID30228_v1_Cardiometabolic_II	10074_128_BRD2_BRD2	17	Inverse variance weighted	0.101576931993666	0.0234095268485409	1.10691507229969	1.05727438258072	1.15888647022117	1.43049229537209e-05
PECR_Q9BY49_OID30228_v1_Cardiometabolic_II	10074_128_BRD2_BRD2	17	Simple mode	0.166430409430788	0.065644726801591	1.18108134088761	1.03848897177597	1.34325271784764	0.0220475504925004
PECR_Q9BY49_OID30228_v1_Cardiometabolic_II	10074_128_BRD2_BRD2	17	Weighted mode	0.0655598667785109	0.0253711501211231	1.06775665855148	1.01595840925027	1.1221958216994	0.0199779079159233
PKD1_P98161_OID30328_v1_Cardiometabolic_II	10074_128_BRD2_BRD2	55	MR Egger	0.0257037894232349	0.0231029340182933	1.02603698045063	0.980612442434182	1.07356570210245	0.270911207850425
PKD1_P98161_OID30328_v1_Cardiometabolic_II	10074_128_BRD2_BRD2	55	Weighted median	0.022503024605258	0.023699835878276	1.02275812759938	0.97633583968805	1.07139	0.342365719101401
PKD1_P98161_OID30328_v1_Cardiometabolic_II	10074_128_BRD2_BRD2	55	Inverse variance weighted	0.0445265695770278	0.015456853160448	1.0455327557045	1.01433288209287	1.07769230648974	0.003967920862913
PKD1_P98161_OID30328_v1_Cardiometabolic_II	10074_128_BRD2_BRD2	55	Simple mode	0.00622586607090103	0.0423839304894755	1.0062452870583	0.926031861103686	1.09340684727658	0.883764208199882
PKD1_P98161_OID30328_v1_Cardiometabolic_II	10074_128_BRD2_BRD2	55	Weighted mode	0.0102009691498126	0.0221287728952644	1.01025317640614	0.967372712805689	1.05503439049732	0.646662754690832
RGMA_Q96B86_OID21065_v1_Neurology	10074_128_BRD2_BRD2	100	MR Egger	-0.0361678	0.0205681576677699	0.964478407575089	0.926370123227825	1.00415436050263	0.0817947689230118
RGMA_Q96B86_OID21065_v1_Neurology	10074_128_BRD2_BRD2	100	Weighted median	-0.0383243	0.0186128898295258	0.962400763590091	0.92792387114505	0.998158640552968	0.039492278946843
RGMA_Q96B86_OID21065_v1_Neurology	10074_128_BRD2_BRD2	100	Inverse variance weighted	-0.0218968	0.0110334903262267	0.978341231483334	0.957411104592882	0.99972891543527	0.0471920456409232
RGMA_Q96B86_OID21065_v1_Neurology	10074_128_BRD2_BRD2	100	Simple mode	-0.0147809	0.0351079496974958	0.985327790842123	0.919806	1.05551697522771	0.674658032578538
RGMA_Q96B86_OID21065_v1_Neurology	10074_128_BRD2_BRD2	100	Weighted mode	-0.0294982	0.0192192408288102	0.970932667107187	0.935038224244113	1.0082050333482	0.12801677077152
SLMAP_Q14BN4_OID31441_v1_Oncology_II	7049_2_ADAM23_ADAM_23	4	MR Egger	-0.562789	0.400243318921978	0.56961840784034	0.259950121343182	1.24818226232797	0.294926285214589
SLMAP_Q14BN4_OID31441_v1_Oncology_II	7049_2_ADAM23_ADAM_23	4	Weighted median	-0.186204	0.0936581129223759	0.830104265372076	0.690890546485919	0.997369402279059	0.0467979504311056
SLMAP_Q14BN4_OID31441_v1_Oncology_II	7049_2_ADAM23_ADAM_23	4	Inverse variance weighted	-0.202726	0.0765046991077939	0.816501861067641	0.702805358987945	0.948591641485131	0.00805271710039809
SLMAP_Q14BN4_OID31441_v1_Oncology_II	7049_2_ADAM23_ADAM_23	4	Simple mode	-0.144996	0.129457330893844	0.865026167711391	0.671170625211584	1.11487339093478	0.344286046376798
SLMAP_Q14BN4_OID31441_v1_Oncology_II	7049_2_ADAM23_ADAM_23	4	Weighted mode	-0.279428	0.106727202177373	0.756216027295574	0.613476383976356	0.932167390425154	0.0791271124889111
STAB2_Q8WWQ8_OID30401_v1_Cardiometabolic_II	7049_2_ADAM23_ADAM_23	125	MR Egger	0.0159941887722733	0.0405858826741604	1.01612278046806	0.938423310496284	1.10025560260231	0.694202466459358
STAB2_Q8WWQ8_OID30401_v1_Cardiometabolic_II	7049_2_ADAM23_ADAM_23	125	Weighted median	-0.0250901	0.0150358480870239	0.975222061075007	0.946901369951604	1.0043897903073	0.0951800238207958
STAB2_Q8WWQ8_OID30401_v1_Cardiometabolic_II	7049_2_ADAM23_ADAM_23	125	Inverse variance weighted	0.0590712794029728	0.024901680355667	1.06085085486084	1.01031684129006	1.1139124780123	0.0176834518027821
STAB2_Q8WWQ8_OID30401_v1_Cardiometabolic_II	7049_2_ADAM23_ADAM_23	125	Simple mode	-0.0192	0.0253217640650544	0.980983166435515	0.933484764724763	1.03089842405044	0.449745915077104
STAB2_Q8WWQ8_OID30401_v1_Cardiometabolic_II	7049_2_ADAM23_ADAM_23	125	Weighted mode	-0.0325667	0.0137567391215142	0.967957892367506	0.942207360274661	0.994412186637363	0.0194643680420163
TSC1_Q92574_OID30478_v1_Inflammation_II	10074_128_BRD2_BRD2	8	MR Egger	0.480977770927946	0.137999767829248	1.61765532552524	1.23429286356325	2.12008740344311	0.0130570616792363
TSC1_Q92574_OID30478_v1_Inflammation_II	10074_128_BRD2_BRD2	8	Weighted median	0.226104101117524	0.0686847367955308	1.25370617069861	1.09579707079475	1.43437065524166	0.000995087854993913
TSC1_Q92574_OID30478_v1_Inflammation_II	10074_128_BRD2_BRD2	8	Inverse variance weighted	0.31086784952301	0.066127220002972	1.36460887555623	1.19872500764366	1.55344834834746	2.58817884351981e-06
TSC1_Q92574_OID30478_v1_Inflammation_II	10074_128_BRD2_BRD2	8	Simple mode	0.38396548927583	0.137224981423034	1.46809477579387	1.1218785148311	1.92115477943504	0.0265978198636492
TSC1_Q92574_OID30478_v1_Inflammation_II	10074_128_BRD2_BRD2	8	Weighted mode	0.228666687658673	0.0797133400337846	1.25692302122675	1.07511597683945	1.46947447096277	0.0240396462098109
TSC1_Q92574_OID30478_v1_Inflammation_II	7049_2_ADAM23_ADAM_23	8	MR Egger	0.204634321529236	0.0879209652096573	1.22707626753738	1.03283683977374	1.45784513910572	0.0588432915557156
TSC1_Q92574_OID30478_v1_Inflammation_II	7049_2_ADAM23_ADAM_23	8	Weighted median	0.134446029787512	0.051808297705405	1.1439029206527	1.03344901471876	1.26616201983982	0.00945723429433519
TSC1_Q92574_OID30478_v1_Inflammation_II	7049_2_ADAM23_ADAM_23	8	Inverse variance weighted	0.11969207338819	0.0395546858888456	1.1271497187425	1.04306645480459	1.21801106977342	0.00247820717690762
TSC1_Q92574_OID30478_v1_Inflammation_II	7049_2_ADAM23_ADAM_23	8	Simple mode	0.160847648141623	0.0691959549363691	1.17450601700803	1.02554438248379	1.34510451965726	0.0530398928616894
TSC1_Q92574_OID30478_v1_Inflammation_II	7049_2_ADAM23_ADAM_23	8	Weighted mode	0.145542235004945	0.0534723980725951	1.15666658536953	1.04157744159489	1.28447250898773	0.0296874270354067
