# Supplementary material for: Revealing the Protective Role of the TSC1-BRD2-Ferroptosis Axis in Papillary Thyroid Carcinoma: A Multi-Stage Genetic and Functional Integrative Analysis Study
Source: Research Square preprint supplement (doi:10.21203/rs.3.rs-6458091/v1), 2025-05-13
Supplement: Supplementary file 5 [file d04fec359c6e63112075b27c.xlsx]

## Sheet: Sheet1
Table S3. Ferroptosis-Related Proteins with Causal Effects on PTC Identified by Mendelian Randomization Analysis
id	nsnp	method	b	se	or	or_lci95	or_uci95	pvalue
10074_128_BRD2_BRD2	5	MR Egger	-0.123236	0.949205382244733	0.884054965016039	0.137562270248572	5.6814501516823	0.904916442555172
10074_128_BRD2_BRD2	5	Weighted median	-0.466842	0.292189670594604	0.626979066797752	0.353619472814058	1.11165470349899	0.110101614004967
10074_128_BRD2_BRD2	5	Inverse variance weighted	-0.529986	0.2605763587746	0.588613148131327	0.353201780696046	0.980927778649079	0.041961737277824
10074_128_BRD2_BRD2	5	Simple mode	-0.788211	0.433214103662347	0.454657379450823	0.194502395644444	1.06278039406243	0.142968511915749
10074_128_BRD2_BRD2	5	Weighted mode	-0.318492	0.335384876297091	0.727244679620303	0.37687313695097	1.40334975401774	0.396073136665386
11185_145_GCH1_GCH1	21	MR Egger	0.00644391580809808	0.449256506343761	1.00646472250175	0.417237849779517	2.42780284237353	0.988705471728363
11185_145_GCH1_GCH1	21	Weighted median	-0.225556	0.193676640292187	0.798072238257172	0.545985764200343	1.16654927516224	0.244180219894657
11185_145_GCH1_GCH1	21	Inverse variance weighted	-0.368607	0.175372808059477	0.691697045965075	0.490496116289044	0.975430360216898	0.0355664788565091
11185_145_GCH1_GCH1	21	Simple mode	-0.617332	0.349061162763013	0.539381387144311	0.272125409534313	1.06911104440997	0.0922196364575566
11185_145_GCH1_GCH1	21	Weighted mode	-0.274046	0.19457743702813	0.760297093176603	0.519225091986586	1.11329687030558	0.174364162859757
11537_12_TFR2_TFR2	15	MR Egger	-0.136701	0.298027515326141	0.872230716741982	0.486345872354356	1.56429090175133	0.654033469703592
11537_12_TFR2_TFR2	15	Weighted median	-0.237801	0.220874549660348	0.788359287572165	0.511342600846745	1.21544804847497	0.281643212677768
11537_12_TFR2_TFR2	15	Inverse variance weighted	-0.327726	0.166749740716644	0.720560076750271	0.519672758128995	0.99910340899085	0.0493703560561667
11537_12_TFR2_TFR2	15	Simple mode	-0.259058	0.299068991426558	0.771778337858087	0.42945723125197	1.38696419443341	0.400974251047484
11537_12_TFR2_TFR2	15	Weighted mode	-0.2012	0.218610793880957	0.817748994093902	0.532763856657328	1.25517789727185	0.37297367436482
12954_71_PPARA_PPARa	4	MR Egger	1.02618691059724	1.93698941077499	2.79040545765024	0.0626424362909807	124.298527948622	0.64919332501192
12954_71_PPARA_PPARa	4	Weighted median	-0.486868	0.294561616914101	0.614547938802332	0.345000604605198	1.09469132530472	0.0983598942946845
12954_71_PPARA_PPARa	4	Inverse variance weighted	-0.670272	0.258732841496553	0.511569599087134	0.308082398686896	0.849459286949203	0.00958105724344253
12954_71_PPARA_PPARa	4	Simple mode	-0.52533	0.418984347239499	0.591360206273616	0.26013897234509	1.34430796897309	0.298718670219854
12954_71_PPARA_PPARa	4	Weighted mode	-0.477626	0.309196061718423	0.620254090788278	0.33835814563407	1.13700569087424	0.220116095263054
17750_8_RRM2_RIR2	52	MR Egger	0.160134808012386	0.223053766333418	1.17366908032355	0.758016160230961	1.81724240507987	0.476147655239724
17750_8_RRM2_RIR2	52	Weighted median	-0.168386	0.12452041931272	0.845027419651937	0.662028796522742	1.07861069445048	0.176286452717839
17750_8_RRM2_RIR2	52	Inverse variance weighted	-0.232574	0.0866102584389605	0.792491345865048	0.668760152302015	0.939114765000782	0.00724668169903124
17750_8_RRM2_RIR2	52	Simple mode	-0.224054	0.224708843471886	0.799272224983363	0.514539466942511	1.2415686855392	0.323430990977271
17750_8_RRM2_RIR2	52	Weighted mode	-0.160488	0.156012387557432	0.851728239728234	0.627336593846251	1.15638239737111	0.308481394690743
2211_9_TIMP1_TIMP_1	5	MR Egger	-0.0265429	0.787258273529138	0.973806291335586	0.208134850264723	4.55617447937547	0.975221755687804
2211_9_TIMP1_TIMP_1	5	Weighted median	-0.660113	0.30937507146169	0.516792921315775	0.281819590205362	0.947680476461825	0.0328674959924885
2211_9_TIMP1_TIMP_1	5	Inverse variance weighted	-0.679882	0.254218381622453	0.506677007097882	0.307847861796015	0.83392357518395	0.00748631823658036
2211_9_TIMP1_TIMP_1	5	Simple mode	-0.776479	0.429396738054363	0.460023077143883	0.198275811615181	1.06730735222331	0.144833094798154
2211_9_TIMP1_TIMP_1	5	Weighted mode	-0.532512	0.400447313465275	0.587128254702908	0.267833777103703	1.28706540003358	0.254349290738936
2524_56_HMGB1_HMG_1	19	MR Egger	-0.662432	0.859541640184708	0.515595852450651	0.0956429141529651	2.77949585098533	0.451474976373477
2524_56_HMGB1_HMG_1	19	Weighted median	-0.391195	0.240008002147304	0.676248235092162	0.42248102565791	1.08244311032221	0.103117335284948
2524_56_HMGB1_HMG_1	19	Inverse variance weighted	-0.409431	0.206318898026917	0.664027775119189	0.443163571802068	0.994966450732272	0.0472047449498687
2524_56_HMGB1_HMG_1	19	Simple mode	-0.528788	0.394278584860599	0.589318989234203	0.272103249596122	1.27634223989427	0.196549923688082
2524_56_HMGB1_HMG_1	19	Weighted mode	-0.449941	0.346258238438157	0.637665748308898	0.323483495226756	1.25699645442904	0.210191097105452
4162_54_TF_Transferrin	10	MR Egger	0.638917113195025	0.312307964701935	1.89442831673191	1.02715567565919	3.49397733204608	0.0749965474456095
4162_54_TF_Transferrin	10	Weighted median	0.399802935680758	0.202487066116069	1.49153074118792	1.00293257771099	2.21815902818309	0.0483292801345011
4162_54_TF_Transferrin	10	Inverse variance weighted	0.419716145699952	0.156004502779952	1.52152960159547	1.1206930854989	2.06573267782826	0.00713641836885743
4162_54_TF_Transferrin	10	Simple mode	0.6472885529604	0.290259215296688	1.91035397661941	1.0815340943576	3.37433	0.0526936742940544
4162_54_TF_Transferrin	10	Weighted mode	0.478424551871414	0.192260168075402	1.61353036532556	1.1069346542986	2.35197283752701	0.0345112107105698
5714_88_IFNA6_IFNA6	8	MR Egger	-0.288082	0.816729022026738	0.749700287592744	0.151242517853021	3.71622034065084	0.736354019811086
5714_88_IFNA6_IFNA6	8	Weighted median	-0.529288	0.307516949361289	0.589024249815541	0.322381018480969	1.07620966180192	0.0852205832677446
5714_88_IFNA6_IFNA6	8	Inverse variance weighted	-0.552665	0.248159671819337	0.575414133222543	0.353787714421548	0.935875982165208	0.0259435907026385
5714_88_IFNA6_IFNA6	8	Simple mode	-0.696621	0.364489799088005	0.498265917995584	0.243894047682577	1.01793761428364	0.097581814554947
5714_88_IFNA6_IFNA6	8	Weighted mode	-0.504246	0.300860517909332	0.603961048543343	0.334897023350426	1.0892	0.137641563942162
6276_16_FURIN_Furin	12	MR Egger	0.691138101123917	0.834192352810266	1.99598587482633	0.389115559878256	10.2384998784236	0.426712763675895
6276_16_FURIN_Furin	12	Weighted median	-0.619417	0.298133196306023	0.538258243126722	0.30006448034601	0.965532261465209	0.0377414859256755
6276_16_FURIN_Furin	12	Inverse variance weighted	-0.581931	0.249264474541084	0.55881833156763	0.342840752861236	0.910854165060196	0.0195647451374017
6276_16_FURIN_Furin	12	Simple mode	-0.649926	0.434455796522469	0.522084374710378	0.22280475526218	1.22336749050075	0.162793919021916
6276_16_FURIN_Furin	12	Weighted mode	-0.616266	0.389198102776576	0.539956741876448	0.251806452624113	1.15784675118333	0.141631060927871
7049_2_ADAM23_ADAM_23	249	MR Egger	-0.138796	0.0445002384373355	0.870405470028035	0.797704871031753	0.949731799023411	0.00202998408355924
7049_2_ADAM23_ADAM_23	249	Weighted median	-0.0837132	0.0471856726443893	0.919694945385624	0.838452654854855	1.00880924840567	0.0760426041398322
7049_2_ADAM23_ADAM_23	249	Inverse variance weighted	-0.0726879	0.0283667577860491	0.929891009958455	0.879601127423866	0.983056141519554	0.010394188270076
7049_2_ADAM23_ADAM_23	249	Simple mode	-0.0852165	0.0862019469093631	0.918313454464819	0.77555815494393	1.08734541088292	0.323838017161377
7049_2_ADAM23_ADAM_23	249	Weighted mode	-0.0969018	0.0449819080911708	0.907645176869303	0.831049190956817	0.991300847240602	0.0321850965518195
7863_50_PGRMC1_PGRC1	3	MR Egger	2.96680418030726	5.24958808385484	19.4297263676419	0.000660582547812293	571486.891338082	0.67252268644119
7863_50_PGRMC1_PGRC1	3	Weighted median	1.13176436144906	0.533629590524262	3.10112317829305	1.08964326626911	8.82579213275412	0.0339318965393609
7863_50_PGRMC1_PGRC1	3	Inverse variance weighted	0.907626160891075	0.433051548016662	2.47843214557844	1.06061096778232	5.79159190959569	0.0360924106241226
7863_50_PGRMC1_PGRC1	3	Simple mode	1.21854306691772	0.695406083786226	3.38225642092491	0.865495713243285	13.2174640750325	0.221823148143827
7863_50_PGRMC1_PGRC1	3	Weighted mode	1.23759695389044	0.646931944355618	3.44731943572837	0.970067466271118	12.250705961341	0.195871800294638
8007_19_CTSB_Cathepsin_B	271	MR Egger	-0.152534	0.0533189985839096	0.858529855099257	0.773338006139464	0.953106541053443	0.00455767894506068
8007_19_CTSB_Cathepsin_B	271	Weighted median	-0.257749	0.046183285287381	0.772789036079934	0.705909368742835	0.846005054939166	2.39131656802171e-08
8007_19_CTSB_Cathepsin_B	271	Inverse variance weighted	-0.329191	0.0295777753100084	0.719505357062465	0.678979905067228	0.762449602673185	8.99533308706319e-29
8007_19_CTSB_Cathepsin_B	271	Simple mode	-0.393428	0.114389608104738	0.674739786640676	0.539219909675867	0.844319305549337	0.000675267124531936
8007_19_CTSB_Cathepsin_B	271	Weighted mode	-0.25265	0.0490118786960576	0.776739804565748	0.705595509215991	0.855057488485449	4.91096971029188e-07
