# Supplementary material for: Revealing the Protective Role of the TSC1-BRD2-Ferroptosis Axis in Papillary Thyroid Carcinoma: A Multi-Stage Genetic and Functional Integrative Analysis Study
Source: Research Square preprint supplement (doi:10.21203/rs.3.rs-6458091/v1), 2025-05-13
Supplement: Supplementary file 6 [file f658bf3a47bcf1cf8987b349.xlsx]

## Sheet: Sheet1
Table S4. Potential Upstream Regulators Identified by UK Biobank Pharma Proteomics Project (UKB-PPP) pQTL Data and Mendelian Randomization Analysis in PTC
id	nsnp	method	b	se	or	or_lci95	or_uci95	pvalue
AAMDC_Q9H7C9_OID30236_v1_Cardiometabolic_II	70	MR Egger	0.106363317167636	0.0434083122739611	1.1122258938704	1.02151112402716	1.2109965421805	0.0168522831448423
AAMDC_Q9H7C9_OID30236_v1_Cardiometabolic_II	70	Weighted median	0.106956360988578	0.0468248727277928	1.11288568818838	1.01529540589675	1.21985635686062	0.0223610508237294
AAMDC_Q9H7C9_OID30236_v1_Cardiometabolic_II	70	Inverse variance weighted	0.0824030999878466	0.0322564785359185	1.08589344525279	1.01936552766931	1.1567632438376	0.0106303261632487
AAMDC_Q9H7C9_OID30236_v1_Cardiometabolic_II	70	Simple mode	0.161990653182063	0.0809399893452693	1.17584925082077	1.0033538857964	1.37799980667671	0.0492871657482171
AAMDC_Q9H7C9_OID30236_v1_Cardiometabolic_II	70	Weighted mode	0.102835742701733	0.0380080289746822	1.10830934622499	1.02874540448342	1.19402682294019	0.00858224082191053
ACADSB_P45954_OID30356_v1_Cardiometabolic_II	26	MR Egger	0.141691359773282	0.191452774324023	1.15222097190977	0.79171319688045	1.67688649543778	0.466427022637595
ACADSB_P45954_OID30356_v1_Cardiometabolic_II	26	Weighted median	0.324760744373188	0.141959578908708	1.38369954847107	1.04761899950948	1.8276	0.022155073364868
ACADSB_P45954_OID30356_v1_Cardiometabolic_II	26	Inverse variance weighted	0.256448345233029	0.113240398983716	1.29233200896677	1.03509909202867	1.61348998782991	0.023534992743722
ACADSB_P45954_OID30356_v1_Cardiometabolic_II	26	Simple mode	-0.0406772	0.256101107030411	0.96013898168915	0.581214498273224	1.58610438469433	0.875076825701918
ACADSB_P45954_OID30356_v1_Cardiometabolic_II	26	Weighted mode	0.22601994338296	0.148671868244188	1.25360066606705	0.936714331986271	1.67768825169078	0.140993344457637
ACY3_Q96HD9_OID30086_v1_Cardiometabolic_II	52	MR Egger	-0.218975	0.122075673248259	0.80334208632899	0.632393808012537	1.02050099082346	0.0788995094085052
ACY3_Q96HD9_OID30086_v1_Cardiometabolic_II	52	Weighted median	-0.12625	0.0987581161033281	0.881394566054175	0.726282806564591	1.06963344588103	0.201117287932622
ACY3_Q96HD9_OID30086_v1_Cardiometabolic_II	52	Inverse variance weighted	-0.134386	0.067774830644872	0.874252820802388	0.765501316137801	0.998454187560592	0.0473869014620554
ACY3_Q96HD9_OID30086_v1_Cardiometabolic_II	52	Simple mode	0.0721204324539619	0.174444205476603	1.07478477523776	0.763539660307086	1.51290413993465	0.681025052095128
ACY3_Q96HD9_OID30086_v1_Cardiometabolic_II	52	Weighted mode	-0.140265	0.110830470968046	0.869127602316478	0.699427560307546	1.08000146402043	0.211413261085603
ADAM12_O43184_OID30491_v1_Inflammation_II	20	MR Egger	-0.109403	0.353126538587293	0.896368965394063	0.44864148944652	1.79091176590212	0.760261319645936
ADAM12_O43184_OID30491_v1_Inflammation_II	20	Weighted median	0.273771164236816	0.170975159717451	1.31491386848922	0.94050327429218	1.83837582367432	0.109325197597826
ADAM12_O43184_OID30491_v1_Inflammation_II	20	Inverse variance weighted	0.280801301853402	0.122447561842424	1.32419046360251	1.04164800654422	1.68337132397844	0.0218343534914559
ADAM12_O43184_OID30491_v1_Inflammation_II	20	Simple mode	0.219384288209652	0.28497503822637	1.24530974259868	0.712363626392001	2.17697296374566	0.450862613107065
ADAM12_O43184_OID30491_v1_Inflammation_II	20	Weighted mode	0.242594709544127	0.225497571768714	1.27455195568199	0.819238088421527	1.98291889829336	0.295479783833439
ADAM23_O75077_OID20651_v1_Inflammation	108	MR Egger	-0.118196	0.0421279611731266	0.888521702024842	0.818103019073965	0.965001713186131	0.00597584972658879
ADAM23_O75077_OID20651_v1_Inflammation	108	Weighted median	-0.0789229	0.046702280647215	0.924111133090435	0.843277316941372	1.01269341549366	0.0910439877643895
ADAM23_O75077_OID20651_v1_Inflammation	108	Inverse variance weighted	-0.0661019	0.0288822305316071	0.936035455284571	0.884519167230618	0.99055216213461	0.0220984747814168
ADAM23_O75077_OID20651_v1_Inflammation	108	Simple mode	-0.104095	0.0696190909118857	0.901140054503459	0.786196900611733	1.03288806811455	0.137805319290379
ADAM23_O75077_OID20651_v1_Inflammation	108	Weighted mode	-0.0815675	0.0388578431207787	0.921670527007606	0.854081345161416	0.994608493871193	0.0381583069824659
ADGRD1_Q6QNK2_OID30588_v1_Inflammation_II	66	MR Egger	0.0836261862192587	0.0671473398253839	1.08722239912138	0.953150371903626	1.24015326436946	0.217520362038643
ADGRD1_Q6QNK2_OID30588_v1_Inflammation_II	66	Weighted median	0.0649723149564508	0.0739236273890506	1.06712948044909	0.923192049899475	1.23350859462833	0.379449345533725
ADGRD1_Q6QNK2_OID30588_v1_Inflammation_II	66	Inverse variance weighted	0.115902770085831	0.0486211086852808	1.12288668864903	1.02081915391384	1.23515953899471	0.0171351309741177
ADGRD1_Q6QNK2_OID30588_v1_Inflammation_II	66	Simple mode	0.0807197551784773	0.136557896923282	1.08406704981612	0.829498711422921	1.41676093321601	0.556501558767573
ADGRD1_Q6QNK2_OID30588_v1_Inflammation_II	66	Weighted mode	0.070025033509622	0.066206447423499	1.07253503023415	0.942009797760301	1.22114588809413	0.294117745009306
ADGRE2_Q9UHX3_OID20755_v1_Inflammation	63	MR Egger	0.207075358076649	0.0942680430258162	1.2300752643942	1.02256072277247	1.47970200925773	0.0318542474057841
ADGRE2_Q9UHX3_OID20755_v1_Inflammation	63	Weighted median	0.256686895262594	0.0864959174019921	1.29264033157944	1.09106566959771	1.53145596400433	0.00300116452775216
ADGRE2_Q9UHX3_OID20755_v1_Inflammation	63	Inverse variance weighted	0.165182860457661	0.0573780954724746	1.17960880279628	1.05413633656283	1.32001609219886	0.0039912965964423
ADGRE2_Q9UHX3_OID20755_v1_Inflammation	63	Simple mode	0.232119389866635	0.153864131773221	1.26127030273289	0.932902758222135	1.7052182154414	0.136480425343783
ADGRE2_Q9UHX3_OID20755_v1_Inflammation	63	Weighted mode	0.232119389866635	0.0940100086451681	1.26127030273289	1.04902354350403	1.51646050882917	0.0163145163576203
AFAP1_Q8N556_OID30569_v1_Inflammation_II	127	MR Egger	-0.111439	0.0345668035190253	0.894546348190338	0.835947474314433	0.957252929936693	0.00161360621806938
AFAP1_Q8N556_OID30569_v1_Inflammation_II	127	Weighted median	-0.0852721	0.0335690485255183	0.918262370050812	0.859789696879773	0.980711659271305	0.0110788849506154
AFAP1_Q8N556_OID30569_v1_Inflammation_II	127	Inverse variance weighted	-0.0501362	0.0227322455809047	0.951099881103441	0.909653614044283	0.994434551645658	0.0274183282365215
AFAP1_Q8N556_OID30569_v1_Inflammation_II	127	Simple mode	-0.0818246	0.0582188321706025	0.921433562747263	0.822066890130843	1.03281110180946	0.162343625351394
AFAP1_Q8N556_OID30569_v1_Inflammation_II	127	Weighted mode	-0.0818246	0.0337353799192067	0.921433562747263	0.862477734080289	0.984419396591723	0.0167052654175386
AHNAK2_Q8IVF2_OID30244_v1_Cardiometabolic_II	21	MR Egger	0.117483711739511	0.17676070931226	1.12466331098557	0.795354558263529	1.59031912237803	0.514262164025913
AHNAK2_Q8IVF2_OID30244_v1_Cardiometabolic_II	21	Weighted median	0.060086262445867	0.137268755457895	1.06192814711376	0.81142728780691	1.38976271389682	0.661584078782862
AHNAK2_Q8IVF2_OID30244_v1_Cardiometabolic_II	21	Inverse variance weighted	0.207201024737549	0.0987606811913697	1.23022985355848	1.01372340274728	1.49297677106487	0.035904147528415
AHNAK2_Q8IVF2_OID30244_v1_Cardiometabolic_II	21	Simple mode	0.549863994119448	0.259369716844006	1.73301730129426	1.04237248337642	2.88126271029038	0.0467074056025204
AHNAK2_Q8IVF2_OID30244_v1_Cardiometabolic_II	21	Weighted mode	0.14360590586763	0.167255513723893	1.15442906514503	0.831757039173579	1.60227855453533	0.400733731516682
ALDH1A1_P00352_OID21128_v1_Neurology	8	MR Egger	-0.631563	0.809859999933645	0.531759897521253	0.108729861058104	2.60065253335242	0.465124162658565
ALDH1A1_P00352_OID21128_v1_Neurology	8	Weighted median	0.481255628381084	0.326810085602676	1.61810486556518	0.852747201520608	3.07038633641583	0.140862973153301
ALDH1A1_P00352_OID21128_v1_Neurology	8	Inverse variance weighted	0.641302859146677	0.249504639215743	1.89895333704741	1.16447898788352	3.09668428009813	0.0101609203852803
ALDH1A1_P00352_OID21128_v1_Neurology	8	Simple mode	0.314763912527887	0.468678633934719	1.3699358480844	0.546704845476615	3.43279238037594	0.523377269179513
ALDH1A1_P00352_OID21128_v1_Neurology	8	Weighted mode	0.419635258483821	0.34562549325093	1.52140653427909	0.772756946807921	2.99535041659412	0.264064092764712
ALDH5A1_P51649_OID31047_v1_Neurology_II	11	MR Egger	0.781176988035315	0.344687633241303	2.18404134384472	1.1113652637566	4.29205	0.0496598685143015
ALDH5A1_P51649_OID31047_v1_Neurology_II	11	Weighted median	0.580958154658547	0.220793582816703	1.78775055190028	1.15974799095301	2.75581597101406	0.00850770549873421
ALDH5A1_P51649_OID31047_v1_Neurology_II	11	Inverse variance weighted	0.446237133230901	0.160841434380117	1.56242192476708	1.13995401268858	2.14145679897683	0.00553050523665894
ALDH5A1_P51649_OID31047_v1_Neurology_II	11	Simple mode	0.288104097929391	0.380057040643388	1.33389615272385	0.633302111253527	2.80952631395731	0.465907403673225
ALDH5A1_P51649_OID31047_v1_Neurology_II	11	Weighted mode	0.599344118676085	0.245582073454854	1.82092409853352	1.12524777371046	2.94669729644214	0.0348189169571639
AMBN_Q9NP70_OID20437_v1_Inflammation	4	MR Egger	0.603057536558949	1.28835641385027	1.82769852099047	0.146296333236661	22.8336678693573	0.685779773726732
AMBN_Q9NP70_OID20437_v1_Inflammation	4	Weighted median	0.941187698257022	0.396265815392795	2.56302371010252	1.17881146766471	5.5726388135343	0.0175421860826844
AMBN_Q9NP70_OID20437_v1_Inflammation	4	Inverse variance weighted	0.69964209646897	0.332090794244281	2.01303210722623	1.04995167547185	3.85950930827609	0.0351366922970092
AMBN_Q9NP70_OID20437_v1_Inflammation	4	Simple mode	1.02091503306023	0.619174128013491	2.77573349018784	0.824757184450999	9.34177543864506	0.197742218908817
AMBN_Q9NP70_OID20437_v1_Inflammation	4	Weighted mode	1.01373355307586	0.509316080265988	2.75587102200988	1.01559437857423	7.47820709742015	0.140631750889588
AMBP_P02760_OID21413_v1_Oncology	57	MR Egger	0.265645341449211	0.215726138760006	1.30427240528869	0.854552028590642	1.99066464098518	0.223412460340612
AMBP_P02760_OID21413_v1_Oncology	57	Weighted median	0.400547874004187	0.140213591790999	1.49264225355028	1.13397508491961	1.96475295331696	0.00428073046689372
AMBP_P02760_OID21413_v1_Oncology	57	Inverse variance weighted	0.396194127709429	0.0894193078459365	1.48615779395824	1.24723897008368	1.77084347227753	9.39081996893259e-06
AMBP_P02760_OID21413_v1_Oncology	57	Simple mode	0.392956015794837	0.2649949941122	1.48135323175186	0.881232156798595	2.49015810452683	0.14371234697984
AMBP_P02760_OID21413_v1_Oncology	57	Weighted mode	0.392956015794837	0.211694933980212	1.48135323175186	0.978273442169006	2.24314317718396	0.0686837869506774
ANGPTL1_O95841_OID20211_v1_Cardiometabolic	60	MR Egger	0.0201584492218781	0.0987188833395788	1.02036300294259	0.840859612559384	1.23818606842707	0.838911633593429
ANGPTL1_O95841_OID20211_v1_Cardiometabolic	60	Weighted median	0.157407058126007	0.0896216502016325	1.17047196706808	0.981914171411032	1.39523867317598	0.0790285260931571
ANGPTL1_O95841_OID20211_v1_Cardiometabolic	60	Inverse variance weighted	0.114933361341009	0.0563859396437944	1.1217986799214	1.00442668860634	1.25288614146593	0.0415165711876455
ANGPTL1_O95841_OID20211_v1_Cardiometabolic	60	Simple mode	0.278939844107273	0.153439718516229	1.32172783176034	0.97843394170019	1.7854700116129	0.0741556432451966
ANGPTL1_O95841_OID20211_v1_Cardiometabolic	60	Weighted mode	0.0809020497672335	0.0871861767498106	1.08426468738673	0.913946853236385	1.28632196516768	0.357228240502027
ANGPTL3_Q9Y5C1_OID20407_v1_Cardiometabolic	51	MR Egger	0.262670975201159	0.121576892477862	1.30039878510648	1.02467989468255	1.65030758296502	0.0356487064140134
ANGPTL3_Q9Y5C1_OID20407_v1_Cardiometabolic	51	Weighted median	0.175373656894625	0.114601939877435	1.19169141714534	0.951946783664632	1.49181493972899	0.125946140515156
ANGPTL3_Q9Y5C1_OID20407_v1_Cardiometabolic	51	Inverse variance weighted	0.210836815762248	0.0749052136143479	1.23471085327145	1.06611648960692	1.42996652434144	0.00488205342436587
ANGPTL3_Q9Y5C1_OID20407_v1_Cardiometabolic	51	Simple mode	0.277460979878998	0.229627008228658	1.31977462037364	0.84146744223927	2.06996130943246	0.232611247409719
ANGPTL3_Q9Y5C1_OID20407_v1_Cardiometabolic	51	Weighted mode	0.201146110657715	0.110560840229809	1.22280342338401	0.984567189209866	1.51868580288524	0.0748521396906711
AOC1_P19801_OID20452_v1_Inflammation	17	MR Egger	-0.0776065	0.188115299361369	0.925328439600541	0.639983732191695	1.33789763405596	0.68577410920232
AOC1_P19801_OID20452_v1_Inflammation	17	Weighted median	-0.137932	0.127152352575425	0.871158309107333	0.678989120678721	1.11771569884379	0.278021774288844
AOC1_P19801_OID20452_v1_Inflammation	17	Inverse variance weighted	-0.291324	0.115648038775591	0.747273796471408	0.595714478912975	0.93739223513882	0.0117670671631333
AOC1_P19801_OID20452_v1_Inflammation	17	Simple mode	-0.337422	0.247973048274493	0.713607735300419	0.438915208026318	1.16021498131835	0.192463047695456
AOC1_P19801_OID20452_v1_Inflammation	17	Weighted mode	-0.1244	0.135525431634476	0.883026913743139	0.677036938881824	1.15168979063761	0.372298310265274
APOBR_Q0VD83_OID30246_v1_Cardiometabolic_II	141	MR Egger	-0.0669155	0.0286842648173648	0.935274204213115	0.884142805072564	0.98936261432867	0.0210921869090434
APOBR_Q0VD83_OID30246_v1_Cardiometabolic_II	141	Weighted median	-0.0576535	0.0305427208383868	0.943976931708246	0.889125145105445	1.00221262721305	0.0590747875140549
APOBR_Q0VD83_OID30246_v1_Cardiometabolic_II	141	Inverse variance weighted	-0.0493939	0.020102251725103	0.951806108850886	0.91503373504155	0.990056250554224	0.0140050321677447
APOBR_Q0VD83_OID30246_v1_Cardiometabolic_II	141	Simple mode	-0.00696715	0.0489098448878102	0.99305706843896	0.902279949445116	1.09296714593187	0.886930365589969
APOBR_Q0VD83_OID30246_v1_Cardiometabolic_II	141	Weighted mode	-0.0526882	0.0266280253837364	0.948675790125965	0.900433376906789	0.999502881448928	0.0498151338296079
APOF_Q13790_OID30701_v1_Inflammation_II	29	MR Egger	-0.673174	0.218818369210985	0.510086898824689	0.332186679121256	0.783260319290568	0.0047603128180986
APOF_Q13790_OID30701_v1_Inflammation_II	29	Weighted median	-0.470564	0.158449300179901	0.624649808806756	0.457890722482054	0.852140837288113	0.0029798535939473
APOF_Q13790_OID30701_v1_Inflammation_II	29	Inverse variance weighted	-0.298367	0.11429686518149	0.74202871219863	0.593101816966891	0.928350907004378	0.00904206701063722
APOF_Q13790_OID30701_v1_Inflammation_II	29	Simple mode	0.0405125630075847	0.371329973581783	1.04134439203784	0.502935078795839	2.15613940754538	0.913900333278151
APOF_Q13790_OID30701_v1_Inflammation_II	29	Weighted mode	-0.522753	0.216795663241766	0.592885967983025	0.387642135848608	0.906799696224072	0.0227046487459461
APOM_O95445_OID20374_v1_Cardiometabolic	86	MR Egger	-0.193388	0.14047762576288	0.824161971362721	0.625800062611553	1.0853993082166	0.172279510892325
APOM_O95445_OID20374_v1_Cardiometabolic	86	Weighted median	-0.0479359	0.104554705626669	0.953194921826475	0.776574199744997	1.16998550723695	0.64661023976894
APOM_O95445_OID20374_v1_Cardiometabolic	86	Inverse variance weighted	-0.152514	0.0750429191164699	0.858546729785028	0.741115874776041	0.994584669296569	0.0421173037628175
APOM_O95445_OID20374_v1_Cardiometabolic	86	Simple mode	0.0144496667386815	0.215539162393129	1.01455456782604	0.664974163106924	1.54791122453154	0.946707589703764
APOM_O95445_OID20374_v1_Cardiometabolic	86	Weighted mode	-0.0620531	0.157471718536467	0.939832999988391	0.690252609669111	1.27965625264438	0.6945246665061
ARHGAP1_Q07960_OID21202_v1_Oncology	13	MR Egger	0.736964923152249	0.56539481452255	2.08958383293657	0.689899797250925	6.32897793602599	0.219041534886775
ARHGAP1_Q07960_OID21202_v1_Oncology	13	Weighted median	0.495682151438764	0.255912083786067	1.64161768906491	0.99411187060119	2.71087059389109	0.0527546846442829
ARHGAP1_Q07960_OID21202_v1_Oncology	13	Inverse variance weighted	0.544924372919559	0.208482998342146	1.72447796021136	1.14602300947735	2.59490796490286	0.00895521048888375
ARHGAP1_Q07960_OID21202_v1_Oncology	13	Simple mode	1.12310584915281	0.401531271986071	3.07438797568946	1.39948534183516	6.7538123783916	0.0161320544508055
ARHGAP1_Q07960_OID21202_v1_Oncology	13	Weighted mode	0.506299245794696	0.279853640262667	1.65913975106467	0.958664710690687	2.87143636650574	0.0955299111677544
ARHGAP45_Q92619_OID30653_v1_Inflammation_II	4	MR Egger	-1.68859	2.43602140361555	0.184780720138173	0.00155981601378081	21.8897063712154	0.559877826816825
ARHGAP45_Q92619_OID30653_v1_Inflammation_II	4	Weighted median	-0.704707	0.379967023777767	0.494253260162911	0.234701076981975	1.04084006909106	0.0636457041046037
ARHGAP45_Q92619_OID30653_v1_Inflammation_II	4	Inverse variance weighted	-0.725277	0.31868243029984	0.484190498292792	0.259267632268954	0.904241060040317	0.0228543409475887
ARHGAP45_Q92619_OID30653_v1_Inflammation_II	4	Simple mode	-0.353885	0.537610124256875	0.701955452540671	0.244729642330943	2.01341142273748	0.557379434146293
ARHGAP45_Q92619_OID30653_v1_Inflammation_II	4	Weighted mode	-0.616299	0.451290530629445	0.539938813159238	0.222945285341094	1.30764784511938	0.265429367073917
ASPN_Q9BXN1_OID30315_v1_Cardiometabolic_II	45	MR Egger	0.139079942442079	0.18616099898294	1.14921596746242	0.797881159492259	1.65525570338197	0.459072163017972
ASPN_Q9BXN1_OID30315_v1_Cardiometabolic_II	45	Weighted median	0.359468208970769	0.12190371328191	1.43256738547382	1.12810240207659	1.81920480813227	0.00319022718795404
ASPN_Q9BXN1_OID30315_v1_Cardiometabolic_II	45	Inverse variance weighted	0.306052264259868	0.0927421262515121	1.35805328234279	1.13233027184395	1.62877277375853	0.000966727650416012
ASPN_Q9BXN1_OID30315_v1_Cardiometabolic_II	45	Simple mode	0.27386728882121	0.200841201773317	1.3150402701134	0.887114279587186	1.9493891055667	0.179629432197184
ASPN_Q9BXN1_OID30315_v1_Cardiometabolic_II	45	Weighted mode	0.27386728882121	0.120720019429131	1.3150402701134	1.03795875692366	1.66608827227911	0.0282503279320033
AXL_P30530_OID20363_v1_Cardiometabolic	59	MR Egger	0.390680428576324	0.162756101168445	1.47798611580758	1.07430986598228	2.03334533889126	0.019664762750965
AXL_P30530_OID20363_v1_Cardiometabolic	59	Weighted median	0.300158155788801	0.12091338594881	1.35007231244355	1.06520569283973	1.7111204540858	0.0130492310915111
AXL_P30530_OID20363_v1_Cardiometabolic	59	Inverse variance weighted	0.287220744712089	0.0857821983451723	1.33271837154078	1.12646863311787	1.57673121614251	0.000813219079727445
AXL_P30530_OID20363_v1_Cardiometabolic	59	Simple mode	0.507238272270658	0.210639252929969	1.66069845893769	1.09898314268526	2.50951926776539	0.0192360634887553
AXL_P30530_OID20363_v1_Cardiometabolic	59	Weighted mode	0.255715790368714	0.136939519925343	1.29138565153898	0.987394455243632	1.68896725330432	0.0669069030600486
B2M_P61769_OID30725_v1_Inflammation_II	97	MR Egger	0.0688053343126531	0.153770871412688	1.07122765758182	0.792481930868773	1.44801874928584	0.655566164990108
B2M_P61769_OID30725_v1_Inflammation_II	97	Weighted median	-0.0903957	0.086290009717816	0.913569581901702	0.771418574579343	1.08191506981948	0.2948319048503
B2M_P61769_OID30725_v1_Inflammation_II	97	Inverse variance weighted	-0.156703	0.0582577839645183	0.854957906177622	0.76270168514431	0.958373418563144	0.00714902326915247
B2M_P61769_OID30725_v1_Inflammation_II	97	Simple mode	-0.150607	0.199179947177012	0.860185471260831	0.58216582730311	1.2709764301967	0.451418796233668
B2M_P61769_OID30725_v1_Inflammation_II	97	Weighted mode	-0.0572455	0.125253826941716	0.944362231208252	0.738788964562853	1.20713771660128	0.648677938975705
B3GNT7_Q8NFL0_OID30281_v1_Cardiometabolic_II	115	MR Egger	0.011880127179656	0.0582425885907505	1.01195097617761	0.902780939908916	1.13432255037434	0.83873866073776
B3GNT7_Q8NFL0_OID30281_v1_Cardiometabolic_II	115	Weighted median	-0.103293	0.0663260431179126	0.901862736002779	0.79192230447416	1.02706590027224	0.11938710754902
B3GNT7_Q8NFL0_OID30281_v1_Cardiometabolic_II	115	Inverse variance weighted	-0.104199	0.0390870301063117	0.901045993098789	0.834594287903801	0.972788687205782	0.00768008635840814
B3GNT7_Q8NFL0_OID30281_v1_Cardiometabolic_II	115	Simple mode	-0.121583	0.12246400517778	0.885517671757075	0.696552358198484	1.12574674073622	0.322907656868488
B3GNT7_Q8NFL0_OID30281_v1_Cardiometabolic_II	115	Weighted mode	-0.0739046	0.0621306141571743	0.928760326813812	0.822274853867541	1.04903578238604	0.236713273192582
BPIFB1_Q8TDL5_OID20308_v1_Cardiometabolic	113	MR Egger	-0.0543312	0.0719548812265247	0.947118395223255	0.822536237584617	1.09056989051865	0.451804466444147
BPIFB1_Q8TDL5_OID20308_v1_Cardiometabolic	113	Weighted median	-0.106907	0.0668646856029752	0.898609202036847	0.788232780702515	1.02444165956358	0.109852475586385
BPIFB1_Q8TDL5_OID20308_v1_Cardiometabolic	113	Inverse variance weighted	-0.11585	0.0439102338633913	0.890608543554231	0.817164913909857	0.970653003267938	0.00833120720571683
BPIFB1_Q8TDL5_OID20308_v1_Cardiometabolic	113	Simple mode	-0.066416	0.13153560180448	0.935741537728458	0.723086983393144	1.21093622972099	0.614601667481494
BPIFB1_Q8TDL5_OID20308_v1_Cardiometabolic	113	Weighted mode	-0.0904058	0.0698057825284005	0.9135603841421	0.796741386017489	1.04750749756527	0.197947376859178
BTN1A1_Q13410_OID31363_v1_Oncology_II	22	MR Egger	-0.286369	0.180555176559268	0.750985664022882	0.52715699971228	1.06985104603696	0.12841388138862
BTN1A1_Q13410_OID31363_v1_Oncology_II	22	Weighted median	-0.325328	0.147417685782777	0.722290539885665	0.541037614214027	0.964264979554539	0.0273249713276404
BTN1A1_Q13410_OID31363_v1_Oncology_II	22	Inverse variance weighted	-0.247452	0.108016105735087	0.780787581789675	0.631811798907859	0.964890571734755	0.0219702413806476
BTN1A1_Q13410_OID31363_v1_Oncology_II	22	Simple mode	-0.0433077	0.327744773838586	0.957616659096676	0.50374379425403	1.82042871046672	0.896132570506967
BTN1A1_Q13410_OID31363_v1_Oncology_II	22	Weighted mode	-0.330903	0.137671000989573	0.718274990987795	0.548406790276578	0.940759618272273	0.0255531943116941
BTN2A1_Q7KYR7_OID20713_v1_Inflammation	133	MR Egger	-0.0700526	0.0886355621331352	0.932344736506083	0.783661317059389	1.10923773927292	0.430754910579698
BTN2A1_Q7KYR7_OID20713_v1_Inflammation	133	Weighted median	-0.151121	0.0622650087938714	0.859743875712678	0.76097089295676	0.971337456750081	0.0152218455160892
BTN2A1_Q7KYR7_OID20713_v1_Inflammation	133	Inverse variance weighted	-0.145131	0.0390027098436975	0.864908876004459	0.801254676264508	0.933619966224505	0.000198394339297781
BTN2A1_Q7KYR7_OID20713_v1_Inflammation	133	Simple mode	-0.246411	0.139610690168708	0.781600633208321	0.594491820931474	1.0275995872819	0.0798781963302973
BTN2A1_Q7KYR7_OID20713_v1_Inflammation	133	Weighted mode	-0.150219	0.0863197392502993	0.860519338951922	0.726580586065709	1.01914852517582	0.0841430640361978
BTN3A2_P78410_OID20540_v1_Inflammation	215	MR Egger	0.0613590138072328	0.0445356347478353	1.06328057808029	0.974402486406916	1.16026549962088	0.169725981491563
BTN3A2_P78410_OID20540_v1_Inflammation	215	Weighted median	0.122233072215182	0.0350019065143302	1.13001744675944	1.05509344392565	1.21026193208979	0.000479089413760011
BTN3A2_P78410_OID20540_v1_Inflammation	215	Inverse variance weighted	0.0703411394468184	0.0241847593712304	1.07287411851615	1.02320413352834	1.12495526206737	0.0036317837539665
BTN3A2_P78410_OID20540_v1_Inflammation	215	Simple mode	0.0887181640486694	0.0793296412225365	1.09277263030812	0.935412254702215	1.27660506428865	0.264672116145387
BTN3A2_P78410_OID20540_v1_Inflammation	215	Weighted mode	0.127476648024294	0.0469200225580863	1.13595834105985	1.03615153641377	1.24537898876226	0.00712904519384449
C1RL_Q9NZP8_OID30721_v1_Inflammation_II	56	MR Egger	-0.129626	0.0838542792296661	0.878424200658187	0.745291363542208	1.03533881384938	0.127983125354604
C1RL_Q9NZP8_OID30721_v1_Inflammation_II	56	Weighted median	-0.0907525	0.0783020439705712	0.913243713244686	0.783311758329373	1.06472815058937	0.246453955433183
C1RL_Q9NZP8_OID30721_v1_Inflammation_II	56	Inverse variance weighted	-0.112481	0.0571570152634149	0.893614097794165	0.798908382605887	0.999546597786061	0.049075589321321
C1RL_Q9NZP8_OID30721_v1_Inflammation_II	56	Simple mode	-0.148902	0.135351425285963	0.861653201681313	0.660874579261178	1.12342986591748	0.276072995220306
C1RL_Q9NZP8_OID30721_v1_Inflammation_II	56	Weighted mode	-0.0875974	0.0711350675415344	0.916129660755178	0.796903166021764	1.05319390247281	0.223404151175381
C7orf50_Q9BRJ6_OID31095_v1_Neurology_II	32	MR Egger	-0.113313	0.0961168870928582	0.892871059355433	0.739558274288745	1.07796607292536	0.247700166985065
C7orf50_Q9BRJ6_OID31095_v1_Neurology_II	32	Weighted median	-0.117925	0.0821148930139639	0.888762995201576	0.756638360888049	1.04395931064424	0.150975695950462
C7orf50_Q9BRJ6_OID31095_v1_Neurology_II	32	Inverse variance weighted	-0.122352	0.0563814242129299	0.884836667534773	0.792264642094991	0.988225255318374	0.0300007774065838
C7orf50_Q9BRJ6_OID31095_v1_Neurology_II	32	Simple mode	-0.0789376	0.124688566079085	0.924097600949836	0.723737027906946	1.17992633118536	0.531325622777074
C7orf50_Q9BRJ6_OID31095_v1_Neurology_II	32	Weighted mode	-0.10886	0.0862657793119933	0.896856258102128	0.757341802802632	1.06207150420108	0.216393317635025
C9_P02748_OID30698_v1_Inflammation_II	17	MR Egger	-0.178094	0.404489009958672	0.836863820557236	0.378744902610833	1.84911017766823	0.66600302910667
C9_P02748_OID30698_v1_Inflammation_II	17	Weighted median	-0.457095	0.225535749656997	0.633120057729417	0.406917311718868	0.985067471831315	0.0426922375479618
C9_P02748_OID30698_v1_Inflammation_II	17	Inverse variance weighted	-0.41225	0.170437920396595	0.662159045926788	0.474113836260791	0.924787611263676	0.0155732410563775
C9_P02748_OID30698_v1_Inflammation_II	17	Simple mode	-0.129525	0.407098341072011	0.878512438885958	0.395565868515014	1.95108872303542	0.754473476797398
C9_P02748_OID30698_v1_Inflammation_II	17	Weighted mode	-0.529652	0.322395785936445	0.588810037072824	0.313001465767658	1.10765378975911	0.119915836526811
CACYBP_Q9HB71_OID30649_v1_Inflammation_II	10	MR Egger	-0.527468	0.540904517743983	0.590097373941454	0.204407328025279	1.70353437959688	0.358042369361213
CACYBP_Q9HB71_OID30649_v1_Inflammation_II	10	Weighted median	-0.35864	0.278889652954812	0.698625829544107	0.404435223984075	1.20681389938827	0.198458228498272
CACYBP_Q9HB71_OID30649_v1_Inflammation_II	10	Inverse variance weighted	-0.452945	0.22405078229133	0.635752931557635	0.409800510765085	0.986289131825463	0.0432157530020063
CACYBP_Q9HB71_OID30649_v1_Inflammation_II	10	Simple mode	-0.907983	0.562409072270544	0.403337016126348	0.13394787063144	1.21450791125545	0.140886459210141
CACYBP_Q9HB71_OID30649_v1_Inflammation_II	10	Weighted mode	-0.526399	0.336251048772978	0.590728597234068	0.305608426334416	1.14185423411158	0.151907998150495
CAPG_P40121_OID21431_v1_Oncology	104	MR Egger	-0.0768037	0.0428032024069388	0.926071634599035	0.851549230054292	1.00711578631132	0.0757206100831719
CAPG_P40121_OID21431_v1_Oncology	104	Weighted median	-0.0697445	0.045158073107538	0.9326320743195	0.85363265327385	1.01894249559647	0.122478728911124
CAPG_P40121_OID21431_v1_Oncology	104	Inverse variance weighted	-0.0800398	0.0304679746606106	0.923079635840395	0.869569515827669	0.979882572461407	0.00861380154393565
CAPG_P40121_OID21431_v1_Oncology	104	Simple mode	-0.124891	0.0754395771313725	0.882592806284659	0.761280873885177	1.02323608595337	0.100863949906559
CAPG_P40121_OID21431_v1_Oncology	104	Weighted mode	-0.101278	0.0426220300486211	0.903682075660183	0.831256518234279	0.98241791306993	0.0193410608034017
CAPS_Q13938_OID31126_v1_Neurology_II	66	MR Egger	0.122765568573216	0.18635133175311	1.13061933717236	0.78467705428391	1.6290779481944	0.512396712071087
CAPS_Q13938_OID31126_v1_Neurology_II	66	Weighted median	0.398968228987175	0.116038445156689	1.49028626995105	1.18712317052199	1.87087003400671	0.000585504683361464
CAPS_Q13938_OID31126_v1_Neurology_II	66	Inverse variance weighted	0.378618961806065	0.0791154002597458	1.46026651240729	1.25051163715891	1.70520467294714	1.70431123223983e-06
CAPS_Q13938_OID31126_v1_Neurology_II	66	Simple mode	0.322095583628983	0.246362188962945	1.38001667665538	0.851484223674217	2.23661927596162	0.195680437143936
CAPS_Q13938_OID31126_v1_Neurology_II	66	Weighted mode	0.394308563215243	0.191600098700515	1.48335818783761	1.01894967845912	2.15943099050025	0.0436065953593578
CASP2_P42575_OID20555_v1_Inflammation	4	MR Egger	-1.3834	1.52151290147473	0.250724104969967	0.0127074427397616	4.9469100983075	0.459204234422122
CASP2_P42575_OID20555_v1_Inflammation	4	Weighted median	-0.968608	0.38815673631584	0.379610921321138	0.177391585030306	0.812352240731512	0.0125813273680507
CASP2_P42575_OID20555_v1_Inflammation	4	Inverse variance weighted	-0.863957	0.422698350975605	0.421491047151508	0.184068830940596	0.965153643455304	0.0409625896784265
CASP2_P42575_OID20555_v1_Inflammation	4	Simple mode	-1.34843	0.689692302560236	0.259647585923306	0.0671902642501126	1.0033725812544	0.145544147564991
CASP2_P42575_OID20555_v1_Inflammation	4	Weighted mode	-0.956597	0.413345951847901	0.384198186936441	0.17088664904756	0.863778695807695	0.103624828702324
CASP4_P49662_OID31276_v1_Oncology_II	7	MR Egger	-0.303026	0.313349962650089	0.738579746780427	0.399639605271819	1.36497993481705	0.377932089788928
CASP4_P49662_OID31276_v1_Oncology_II	7	Weighted median	-0.297819	0.263048931058532	0.742435662614584	0.443350348714636	1.24328471765057	0.257558250614008
CASP4_P49662_OID31276_v1_Oncology_II	7	Inverse variance weighted	-0.496491	0.205300523821016	0.608662909346606	0.407025392423952	0.910190234098216	0.0155906218355527
CASP4_P49662_OID31276_v1_Oncology_II	7	Simple mode	-0.83925	0.420791040189886	0.432034374939916	0.18937983701417	0.985604930665129	0.0931388278450523
CASP4_P49662_OID31276_v1_Oncology_II	7	Weighted mode	-0.41441	0.268126980114251	0.66073029116429	0.390651885123622	1.11752825030883	0.173164075356938
CAT_P04040_OID30712_v1_Inflammation_II	17	MR Egger	-0.16396	0.323270910751827	0.848776312352149	0.45042189798577	1.59943650970733	0.619396645049703
CAT_P04040_OID30712_v1_Inflammation_II	17	Weighted median	0.190201570839007	0.184747231896696	1.20949337168126	0.842060846011982	1.7372547637966	0.30323385951958
CAT_P04040_OID30712_v1_Inflammation_II	17	Inverse variance weighted	0.293155116390123	0.13771906380696	1.34065073120559	1.02349756940458	1.75608075369217	0.0332835704168596
CAT_P04040_OID30712_v1_Inflammation_II	17	Simple mode	0.113508205807315	0.310282942470865	1.12020108100889	0.609786513197911	2.05785210845786	0.719289863620453
CAT_P04040_OID30712_v1_Inflammation_II	17	Weighted mode	-0.00826855	0.242874937698683	0.991765543186644	0.61612622537607	1.59642432368778	0.973262796009988
CCDC80_Q76M96_OID20226_v1_Cardiometabolic	32	MR Egger	0.424022361863062	0.336939760613106	1.52809576447023	0.789480954606323	2.9577365378703	0.217934544267518
CCDC80_Q76M96_OID20226_v1_Cardiometabolic	32	Weighted median	0.344864987987865	0.176641057586985	1.41179929693596	0.99864942796179	1.99587282485794	0.0508967864028179
CCDC80_Q76M96_OID20226_v1_Cardiometabolic	32	Inverse variance weighted	0.346036360988084	0.121138668943469	1.4134540094677	1.11472146871057	1.79224343744926	0.00428298201975109
CCDC80_Q76M96_OID20226_v1_Cardiometabolic	32	Simple mode	0.444235618883828	0.306464067233723	1.5592978423593	0.85518799852985	2.84312895569884	0.157225557084209
CCDC80_Q76M96_OID20226_v1_Cardiometabolic	32	Weighted mode	0.25100632495297	0.235473739215175	1.28531821388274	0.810161066211231	2.03915366936182	0.294672391905461
CCL16_O15467_OID20334_v1_Cardiometabolic	65	MR Egger	0.0312295456656864	0.0554365193172127	1.03172230409035	0.925495478733024	1.15014166705028	0.575203799036033
CCL16_O15467_OID20334_v1_Cardiometabolic	65	Weighted median	0.0719123509758847	0.0575812273496174	1.07456115569947	0.959880141778165	1.20294360418702	0.211707012532283
CCL16_O15467_OID20334_v1_Cardiometabolic	65	Inverse variance weighted	0.119762534994289	0.0496293494075955	1.12722914232013	1.02274379430732	1.24238890166656	0.0158157723204176
CCL16_O15467_OID20334_v1_Cardiometabolic	65	Simple mode	0.149030716463166	0.118537670571622	1.16070864152576	0.920072214629356	1.46428131302205	0.213234191128761
CCL16_O15467_OID20334_v1_Cardiometabolic	65	Weighted mode	0.086900318963627	0.0501832984461113	1.09078794342623	0.988606457673467	1.20353081682683	0.088152372400647
CCL18_P55774_OID20395_v1_Cardiometabolic	39	MR Egger	-0.1609	0.0796836077447104	0.851377283993832	0.728272652751053	0.995291086329572	0.0507517063538529
CCL18_P55774_OID20395_v1_Cardiometabolic	39	Weighted median	-0.111139	0.0710288553336609	0.894814253158251	0.77852383074571	1.02847532218534	0.117652374541888
CCL18_P55774_OID20395_v1_Cardiometabolic	39	Inverse variance weighted	-0.131072	0.0571614928694315	0.877154399449329	0.784186210041334	0.981144313201782	0.0218470533305585
CCL18_P55774_OID20395_v1_Cardiometabolic	39	Simple mode	-0.0457678	0.18359616271189	0.955263781465838	0.666565916621177	1.36900022852357	0.804482923020755
CCL18_P55774_OID20395_v1_Cardiometabolic	39	Weighted mode	-0.130783	0.0644984640791935	0.877408278585316	0.773213675801138	0.995643651196935	0.0496465882030503
CCL19_Q99731_OID21030_v1_Neurology	61	MR Egger	0.097435703949199	0.178850238602721	1.1023405631399	0.776381882121705	1.5651507912869	0.587951817616123
CCL19_Q99731_OID21030_v1_Neurology	61	Weighted median	0.135503180870659	0.115278112977552	1.14511283828447	0.913527389514545	1.43540678413676	0.239816384416444
CCL19_Q99731_OID21030_v1_Neurology	61	Inverse variance weighted	0.149328934831956	0.0754646091938844	1.16105483778195	1.00141930707621	1.34613775349778	0.0478391760335102
CCL19_Q99731_OID21030_v1_Neurology	61	Simple mode	-0.0150124	0.235549096568795	0.985099726303101	0.620835810565395	1.56308874946934	0.949394189723306
CCL19_Q99731_OID21030_v1_Neurology	61	Weighted mode	0.119884182029416	0.156755912733165	1.1273662747439	0.829147340418117	1.53284543708364	0.447398681431561
CCL21_O00585_OID20686_v1_Inflammation	52	MR Egger	-0.0688298	0.232587279267543	0.933485574600088	0.591732362608359	1.4726173064886	0.768508449659629
CCL21_O00585_OID20686_v1_Inflammation	52	Weighted median	-0.307365	0.141747978437799	0.735381995405231	0.556999336155943	0.970892861198626	0.0301288681389416
CCL21_O00585_OID20686_v1_Inflammation	52	Inverse variance weighted	-0.245225	0.097935187040594	0.78252833398635	0.645856384935913	0.948121916534454	0.0122814197896936
CCL21_O00585_OID20686_v1_Inflammation	52	Simple mode	-0.568999	0.285144833936418	0.566091707727088	0.323717822576477	0.989935676098475	0.0513461163964077
CCL21_O00585_OID20686_v1_Inflammation	52	Weighted mode	-0.329084	0.226176895077548	0.719582499719474	0.461907413802131	1.12100165191187	0.151801054729951
CCL7_P80098_OID20523_v1_Inflammation	40	MR Egger	0.0423177591862423	0.159381978648883	1.04322592070824	0.763325358172442	1.42576204233962	0.792050570734984
CCL7_P80098_OID20523_v1_Inflammation	40	Weighted median	0.185488110440893	0.113343371409699	1.2038058869688	0.963999119723295	1.50326756928648	0.101731880378963
CCL7_P80098_OID20523_v1_Inflammation	40	Inverse variance weighted	0.274025137761485	0.0826916681700856	1.31524786421027	1.11845634154686	1.54666470209934	0.000920313926890479
CCL7_P80098_OID20523_v1_Inflammation	40	Simple mode	0.397918531552151	0.178051469091188	1.48872274103575	1.05015487378292	2.11044623512848	0.0312274909662637
CCL7_P80098_OID20523_v1_Inflammation	40	Weighted mode	0.200097065380572	0.111863788919042	1.22152131983775	0.98102634855806	1.52097274146745	0.0814238090634954
CD1C_P29017_OID21483_v1_Oncology	138	MR Egger	-0.11262	0.106250877488859	0.893489900565591	0.725516134650073	1.10035347842092	0.291047745993395
CD1C_P29017_OID21483_v1_Oncology	138	Weighted median	-0.0705787	0.0765436336788135	0.931854360341107	0.802034011030417	1.08268793710022	0.356491015185604
CD1C_P29017_OID21483_v1_Oncology	138	Inverse variance weighted	-0.162956	0.0490969309861852	0.849628624664912	0.771679537607879	0.935451524460143	0.000903191929641386
CD1C_P29017_OID21483_v1_Oncology	138	Simple mode	-0.012542	0.176934681059949	0.987536365055588	0.698141180469378	1.39689234726353	0.943592909978526
CD1C_P29017_OID21483_v1_Oncology	138	Weighted mode	-0.0391087	0.0948932590239844	0.961646168885036	0.798436777156395	1.15821738250182	0.680885626345592
CD244_Q9BZW8_OID20628_v1_Inflammation	76	MR Egger	0.237928807180696	0.123714037808003	1.26861887305569	0.995459631854897	1.61673441450782	0.05830041161976
CD244_Q9BZW8_OID20628_v1_Inflammation	76	Weighted median	0.162454102858881	0.0967083922015555	1.1763943240733	0.973269413256521	1.42191215182793	0.0929895021226837
CD244_Q9BZW8_OID20628_v1_Inflammation	76	Inverse variance weighted	0.163968679740408	0.0726561529956074	1.1781774136924	1.02179677311416	1.35849129167276	0.0240220601488118
CD244_Q9BZW8_OID20628_v1_Inflammation	76	Simple mode	0.18155556185446	0.189954392499009	1.19908115803168	0.826334976227316	1.73996704110353	0.342251545569843
CD244_Q9BZW8_OID20628_v1_Inflammation	76	Weighted mode	0.162420896238937	0.0939381726891367	1.17635526064267	0.97853578431539	1.41416565589354	0.0879200756403245
CD27_P26842_OID21527_v1_Oncology	42	MR Egger	0.21354705834926	0.132400175806759	1.23806175803989	0.955082756502762	1.60488387659042	0.114631173390446
CD27_P26842_OID21527_v1_Oncology	42	Weighted median	0.119113386559992	0.120126891745433	1.12649764073953	0.890176678079734	1.42555625848251	0.321410723919571
CD27_P26842_OID21527_v1_Oncology	42	Inverse variance weighted	0.17961125691307	0.0807451031878259	1.19675204359908	1.02158041502133	1.4019605630641	0.0261200042756874
CD27_P26842_OID21527_v1_Oncology	42	Simple mode	0.192790256257278	0.182083574600454	1.21262842561949	0.848662625812146	1.73268817772341	0.29588871074214
CD27_P26842_OID21527_v1_Oncology	42	Weighted mode	0.149121264485099	0.113639079219572	1.16081374615573	0.929032710092689	1.45042100092434	0.19673996964796
CD300A_Q9UGN4_OID30576_v1_Inflammation_II	92	MR Egger	0.0708102560392621	0.0853508022127006	1.07337753963911	0.908030494859625	1.26883331465628	0.408938711307748
CD300A_Q9UGN4_OID30576_v1_Inflammation_II	92	Weighted median	0.0688596416182624	0.0785378496600625	1.0712858346493	0.918443817634998	1.24956292098026	0.380611499630792
CD300A_Q9UGN4_OID30576_v1_Inflammation_II	92	Inverse variance weighted	0.139547602966843	0.0511993493620469	1.14975353609484	1.03997521196192	1.27111990608773	0.006418983310285
CD300A_Q9UGN4_OID30576_v1_Inflammation_II	92	Simple mode	0.126239570448536	0.189017514494891	1.13455394132394	0.783303725890844	1.64331229793367	0.505905432952521
CD300A_Q9UGN4_OID30576_v1_Inflammation_II	92	Weighted mode	0.0917492373523223	0.0864978136154004	1.09608992920308	0.925161948500934	1.29859765076494	0.291628103287551
CD302_Q8IX05_OID21328_v1_Oncology	84	MR Egger	-0.0231459	0.128939065574387	0.977119953914327	0.758914295818045	1.25806485606966	0.857980072426198
CD302_Q8IX05_OID21328_v1_Oncology	84	Weighted median	-0.211491	0.104769118276473	0.80937685647749	0.659127616026252	0.993875662122602	0.0435251393531495
CD302_Q8IX05_OID21328_v1_Oncology	84	Inverse variance weighted	-0.215996	0.071897965715545	0.805738921926953	0.699831617043468	0.927673449580209	0.00266284619858043
CD302_Q8IX05_OID21328_v1_Oncology	84	Simple mode	-0.221079	0.203290773176729	0.801653729537689	0.538198171324109	1.19407448096786	0.279964276403351
CD302_Q8IX05_OID21328_v1_Oncology	84	Weighted mode	-0.163839	0.106648122014507	0.848878351757976	0.688754967476589	1.04622759923373	0.12827780076616
CD7_P09564_OID30543_v1_Inflammation_II	46	MR Egger	0.138267123698669	0.0762052199416486	1.14828224270973	0.988966216309794	1.33326304496276	0.0764371532288567
CD7_P09564_OID30543_v1_Inflammation_II	46	Weighted median	0.16455690980863	0.072015931932153	1.17887065694611	1.02368174582896	1.35758601877106	0.0223124163071553
CD7_P09564_OID30543_v1_Inflammation_II	46	Inverse variance weighted	0.164391673777302	0.055360457816494	1.17867588112974	1.05747625359512	1.31376645861675	0.0029830595738538
CD7_P09564_OID30543_v1_Inflammation_II	46	Simple mode	0.191185948024294	0.120161567177363	1.21068455555303	0.956637522502872	1.53219694876669	0.1185944336591
CD7_P09564_OID30543_v1_Inflammation_II	46	Weighted mode	0.158417647445859	0.0587257494324267	1.17165543143469	1.04426697354782	1.31458380355217	0.0097960873824069
CD84_Q9UIB8_OID20607_v1_Inflammation	39	MR Egger	-0.164733	0.237270588624132	0.848120237364022	0.532707270050941	1.35028744202725	0.491841567689233
CD84_Q9UIB8_OID20607_v1_Inflammation	39	Weighted median	-0.221574	0.145273390843981	0.801256921583485	0.602715815137519	1.06519961524314	0.127204660903407
CD84_Q9UIB8_OID20607_v1_Inflammation	39	Inverse variance weighted	-0.269049	0.110150344303098	0.764105975238694	0.615732007282955	0.948233865528397	0.0145835186548159
CD84_Q9UIB8_OID20607_v1_Inflammation	39	Simple mode	-0.261186	0.322848980289058	0.770137336008874	0.409028508288381	1.45004933469498	0.42354886905511
CD84_Q9UIB8_OID20607_v1_Inflammation	39	Weighted mode	-0.191487	0.169908172001956	0.825730157075491	0.591846917815599	1.15203825817059	0.266807207566017
CD8A_P01732_OID21018_v1_Neurology	126	MR Egger	0.215050850400523	0.0812116842003618	1.23992494604314	1.05746649621246	1.45386532559344	0.00914830945572503
CD8A_P01732_OID21018_v1_Neurology	126	Weighted median	0.19975088934459	0.0661047805528865	1.22109853161318	1.0727071708515	1.39001739190785	0.00251333479614753
CD8A_P01732_OID21018_v1_Neurology	126	Inverse variance weighted	0.21591032828863	0.0425403769587287	1.24099109221607	1.14171462498453	1.34890002918243	3.86638699210627e-07
CD8A_P01732_OID21018_v1_Neurology	126	Simple mode	0.330848985688043	0.139086419212813	1.39214954192797	1.05996893811649	1.82843126566908	0.0188862772674034
CD8A_P01732_OID21018_v1_Neurology	126	Weighted mode	0.21441122555157	0.0877323142413765	1.23913211282176	1.04337003192929	1.47162401261125	0.0159238494575605
CDC27_P30260_OID21238_v1_Oncology	3	MR Egger	0.113649262185868	0.840782920225507	1.12035910366142	0.215609740702729	5.82165034411698	0.914466044621372
CDC27_P30260_OID21238_v1_Oncology	3	Weighted median	-1.1403	0.432466193935655	0.319721852853846	0.136977635484865	0.746268270951367	0.00837052748349694
CDC27_P30260_OID21238_v1_Oncology	3	Inverse variance weighted	-1.11501	0.448763346983822	0.327912714848562	0.136070250425103	0.790229666098394	0.0129688627448995
CDC27_P30260_OID21238_v1_Oncology	3	Simple mode	-1.83168	0.761484742432726	0.160143587804153	0.0360015049373518	0.712358240562847	0.137950755433181
CDC27_P30260_OID21238_v1_Oncology	3	Weighted mode	-0.560832	0.466103245299449	0.570734288008778	0.228917435658983	1.42294808855947	0.351991153310091
CDH6_P55285_OID20157_v1_Cardiometabolic	112	MR Egger	-0.114047	0.0623529767937525	0.892216033333317	0.789576289029114	1.00819827190592	0.0701004099673467
CDH6_P55285_OID20157_v1_Cardiometabolic	112	Weighted median	-0.056155	0.0566839467017484	0.945392553155078	0.845983373100564	1.05648	0.321847157325114
CDH6_P55285_OID20157_v1_Cardiometabolic	112	Inverse variance weighted	-0.0926868	0.0360208222881021	0.911478902785773	0.849346845096171	0.978156091378059	0.0100778717383944
CDH6_P55285_OID20157_v1_Cardiometabolic	112	Simple mode	-0.0736318	0.108489190176664	0.929013680353401	0.751059331408697	1.14913214201732	0.498739404917282
CDH6_P55285_OID20157_v1_Cardiometabolic	112	Weighted mode	-0.083321	0.0612515344545318	0.920055772296701	0.815973013508439	1.0374149758909	0.176488425704435
CEACAM1_P13688_OID21528_v1_Oncology	41	MR Egger	0.208196725367804	0.0797043183500176	1.23145540423856	1.05335073714662	1.43967470582144	0.0127112182457372
CEACAM1_P13688_OID21528_v1_Oncology	41	Weighted median	0.209409828861125	0.0833580362536454	1.23295019357509	1.04710381091974	1.45178172783229	0.0119990165143507
CEACAM1_P13688_OID21528_v1_Oncology	41	Inverse variance weighted	0.159607372066499	0.0614366142976281	1.17305020828403	1.03996973112595	1.32316042474178	0.00937905065115676
CEACAM1_P13688_OID21528_v1_Oncology	41	Simple mode	0.21897410036052	0.178517603953637	1.24479903642376	0.877287600732271	1.76626757267301	0.227135270817025
CEACAM1_P13688_OID21528_v1_Oncology	41	Weighted mode	0.203833072358607	0.0727456033218735	1.22609346748216	1.06316646872203	1.4139885288232	0.0077907180909261
CEACAM16_Q2WEN9_OID31495_v1_Oncology_II	87	MR Egger	-0.167509	0.0695797512100004	0.845768749064206	0.73794527121763	0.969346650481716	0.0182287301178114
CEACAM16_Q2WEN9_OID31495_v1_Oncology_II	87	Weighted median	-0.136197	0.0732897308180634	0.872671024736631	0.755901275246985	1.00747907478533	0.0631219303347725
CEACAM16_Q2WEN9_OID31495_v1_Oncology_II	87	Inverse variance weighted	-0.161516	0.0444353151189187	0.850853127269553	0.779884871105559	0.928279379439829	0.00027814124059832
CEACAM16_Q2WEN9_OID31495_v1_Oncology_II	87	Simple mode	-0.268592	0.130371210690176	0.764454828623246	0.592076212838575	0.987020205057158	0.0424007451006098
CEACAM16_Q2WEN9_OID31495_v1_Oncology_II	87	Weighted mode	-0.150051	0.0669838575549165	0.860663978759597	0.754772061881285	0.981412166327385	0.0276621196038872
CEACAM19_Q7Z692_OID31443_v1_Oncology_II	28	MR Egger	0.258956178808928	0.237291932322695	1.29557702985551	0.813722395558452	2.0627671666051	0.285152009537517
CEACAM19_Q7Z692_OID31443_v1_Oncology_II	28	Weighted median	0.29609377591673	0.170956157407371	1.34459624166529	0.961769662937406	1.87980461722892	0.0832759461213227
CEACAM19_Q7Z692_OID31443_v1_Oncology_II	28	Inverse variance weighted	0.231291241705091	0.112337036410578	1.26022621643921	1.01117260284747	1.57062217877382	0.0395033777585123
CEACAM19_Q7Z692_OID31443_v1_Oncology_II	28	Simple mode	-0.0176484	0.320589070047481	0.982506443974986	0.524136593611313	1.84173157191965	0.956504096141024
CEACAM19_Q7Z692_OID31443_v1_Oncology_II	28	Weighted mode	0.474510484977433	0.271098724546686	1.60722724300835	0.944742367979875	2.73426861991145	0.0914199661932311
CEACAM21_Q3KPI0_OID20548_v1_Inflammation	128	MR Egger	-0.073201	0.0276429294690949	0.929414043739586	0.880398094525027	0.9811589439734	0.00912962426832527
CEACAM21_Q3KPI0_OID20548_v1_Inflammation	128	Weighted median	-0.0488481	0.0325457363925168	0.952325729741289	0.893474224175504	1.01505367585079	0.133379410343261
CEACAM21_Q3KPI0_OID20548_v1_Inflammation	128	Inverse variance weighted	-0.0636989	0.0202985187060704	0.938287510174991	0.901690486138167	0.976369902183354	0.00170044527284339
CEACAM21_Q3KPI0_OID20548_v1_Inflammation	128	Simple mode	-0.063262	0.0630523258326176	0.938697537788197	0.829572707264709	1.06217702165611	0.317612000031834
CEACAM21_Q3KPI0_OID20548_v1_Inflammation	128	Weighted mode	-0.0737943	0.0242406134390401	0.928862766923471	0.885762985657775	0.974059713204221	0.0028362355420844
CEACAM6_P40199_OID30362_v1_Cardiometabolic_II	57	MR Egger	0.11297033975919	0.164022808526118	1.11959872488832	0.811789373303404	1.54412135215652	0.493877237239549
CEACAM6_P40199_OID30362_v1_Cardiometabolic_II	57	Weighted median	0.0683919526105916	0.12376275945745	1.07078492318489	0.840143090409801	1.36474413086084	0.580533735290966
CEACAM6_P40199_OID30362_v1_Cardiometabolic_II	57	Inverse variance weighted	0.192627009533251	0.0816074419823062	1.21243048415864	1.03321616041624	1.42273004936832	0.0182547547857251
CEACAM6_P40199_OID30362_v1_Cardiometabolic_II	57	Simple mode	0.415844605508153	0.25163981816789	1.51565032685772	0.925547857794358	2.48198501456022	0.104021289487094
CEACAM6_P40199_OID30362_v1_Cardiometabolic_II	57	Weighted mode	0.0113341317485109	0.147168895329691	1.01139860637749	0.757965883371294	1.34956884395976	0.938886552539272
CES1_P23141_OID20244_v1_Cardiometabolic	56	MR Egger	-0.162665	0.094052046133427	0.849875656739379	0.706800213261008	1.02191343234848	0.0894284620986979
CES1_P23141_OID20244_v1_Cardiometabolic	56	Weighted median	-0.154278	0.0938612251258142	0.857034050475652	0.713020127079474	1.03013552602398	0.100242736589428
CES1_P23141_OID20244_v1_Cardiometabolic	56	Inverse variance weighted	-0.134492	0.0621072963521047	0.874159717212119	0.773969758341045	0.987319211068776	0.03035086026826
CES1_P23141_OID20244_v1_Cardiometabolic	56	Simple mode	-0.153935	0.1922984210666	0.857327586485679	0.588110695721691	1.24978272950367	0.426864639125362
CES1_P23141_OID20244_v1_Cardiometabolic	56	Weighted mode	-0.215882	0.0850323545149249	0.805830306464464	0.682122845920514	0.951972927897331	0.0139819315353365
CFHR2_P36980_OID30720_v1_Inflammation_II	122	MR Egger	-0.0394503	0.0362090115332199	0.961317707965313	0.895457976647308	1.0320213340527	0.278109194393103
CFHR2_P36980_OID30720_v1_Inflammation_II	122	Weighted median	-0.0260318	0.0362816168967855	0.974304119788158	0.907425549598972	1.04611173694161	0.473070294994031
CFHR2_P36980_OID30720_v1_Inflammation_II	122	Inverse variance weighted	-0.0598221	0.0248358113873227	0.941932042789442	0.89717859090689	0.988917905783564	0.0160092230336473
CFHR2_P36980_OID30720_v1_Inflammation_II	122	Simple mode	-0.11656	0.0607070852294842	0.889976846626055	0.790139538053406	1.00242900068231	0.057207073394685
CFHR2_P36980_OID30720_v1_Inflammation_II	122	Weighted mode	-0.0467848	0.0336243798759556	0.954292703623682	0.893428810944085	1.01930288461046	0.166658160053921
CFHR4_Q92496_OID30758_v1_Inflammation_II	155	MR Egger	-0.0496933	0.034317549785059	0.951521190171947	0.889624585052867	1.01772431940203	0.149650858479944
CFHR4_Q92496_OID30758_v1_Inflammation_II	155	Weighted median	-0.0919601	0.0338480522505307	0.912141524851781	0.853591699971118	0.974707417360179	0.0065906237774431
CFHR4_Q92496_OID30758_v1_Inflammation_II	155	Inverse variance weighted	-0.0681649	0.0235047086997327	0.934106469897829	0.892049118054257	0.978146695563362	0.00373101958152208
CFHR4_Q92496_OID30758_v1_Inflammation_II	155	Simple mode	-0.00637634	0.0561926701754874	0.993643949259962	0.890017663362548	1.10933562168951	0.909803563812831
CFHR4_Q92496_OID30758_v1_Inflammation_II	155	Weighted mode	-0.0922695	0.0303308342846973	0.911859390485023	0.859230624268539	0.967711723175091	0.00276258683839254
CFHR5_Q9BXR6_OID30716_v1_Inflammation_II	82	MR Egger	0.00320069025209284	0.0552620696562325	1.00320581793038	0.900222822023923	1.11796978315511	0.953958057120009
CFHR5_Q9BXR6_OID30716_v1_Inflammation_II	82	Weighted median	-0.0716433	0.0604957493771523	0.930862882388312	0.826781388872727	1.04804694139247	0.236306256833819
CFHR5_Q9BXR6_OID30716_v1_Inflammation_II	82	Inverse variance weighted	-0.0815354	0.0383395348689174	0.921700113616669	0.854976878537698	0.993630495474883	0.0334478889824108
CFHR5_Q9BXR6_OID30716_v1_Inflammation_II	82	Simple mode	-0.220098	0.126646770611818	0.802440064312076	0.626049533896818	1.02852892934075	0.0860306414947258
CFHR5_Q9BXR6_OID30716_v1_Inflammation_II	82	Weighted mode	-0.0564482	0.0502544895979038	0.945115403288116	0.856460535567515	1.04294720940127	0.264650513072292
CFP_P27918_OID30784_v1_Inflammation_II	58	MR Egger	0.00648855258729083	0.134147183238483	1.00650964884801	0.773801478079807	1.30920100558359	0.961594335492307
CFP_P27918_OID30784_v1_Inflammation_II	58	Weighted median	0.102382379147475	0.105362362938897	1.10780699304348	0.901110081138217	1.3619161071707	0.331191451935447
CFP_P27918_OID30784_v1_Inflammation_II	58	Inverse variance weighted	0.186363650768069	0.0720743526872745	1.20486032910488	1.04613029144974	1.38767457984507	0.00971775742204878
CFP_P27918_OID30784_v1_Inflammation_II	58	Simple mode	0.133659279513606	0.218999466540551	1.14300330864795	0.744100126253726	1.75575371846489	0.544077085128643
CFP_P27918_OID30784_v1_Inflammation_II	58	Weighted mode	0.095891118951571	0.120289179771157	1.10063921871758	0.869466326471644	1.39327614295912	0.428659617368956
CGA_P01215_OID21069_v1_Neurology	3	MR Egger	1.29427156096381	9.63199931288334	3.64833741456958	2.30765914054038e-08	576790811.810768	0.914965440869483
CGA_P01215_OID21069_v1_Neurology	3	Weighted median	1.58523195773481	0.6965567408596	4.88042329916215	1.24605273842085	19.1151873789793	0.0228572841356975
CGA_P01215_OID21069_v1_Neurology	3	Inverse variance weighted	1.4570012178374	0.597498863506564	4.29306623546919	1.33096393831006	13.8474207840123	0.0147483423595485
CGA_P01215_OID21069_v1_Neurology	3	Simple mode	1.74583265151011	0.861829470099804	5.73067114139079	1.05828205455583	31.0319839492627	0.180046786573121
CGA_P01215_OID21069_v1_Neurology	3	Weighted mode	1.70863954926535	0.8380654617444	5.52144471217384	1.06826009362609	28.5383231026724	0.1783256110208
CGREF1_Q99674_OID20152_v1_Cardiometabolic	136	MR Egger	0.116721433475399	0.0693716904857457	1.12380633125917	0.98093696251428	1.28748402643641	0.0947907014081416
CGREF1_Q99674_OID20152_v1_Cardiometabolic	136	Weighted median	0.102853550886255	0.0553931409914032	1.10832908337807	0.994299305520683	1.23543620139451	0.063340727057123
CGREF1_Q99674_OID20152_v1_Cardiometabolic	136	Inverse variance weighted	0.0832690420458327	0.0393473642545974	1.08683417330674	1.00616714713208	1.17396848389871	0.0343231566270474
CGREF1_Q99674_OID20152_v1_Cardiometabolic	136	Simple mode	0.0679910927051512	0.115632779121512	1.07035577446184	0.853295681516446	1.34263129269302	0.557520317263412
CGREF1_Q99674_OID20152_v1_Cardiometabolic	136	Weighted mode	0.083567990577893	0.0608141074642684	1.08715912935759	0.964999534475503	1.22478294581555	0.171670776874041
CHI3L1_P36222_OID20399_v1_Cardiometabolic	60	MR Egger	-0.173381	0.0604409486068727	0.84081730579058	0.746884192213766	0.94656407122697	0.00574135905082467
CHI3L1_P36222_OID20399_v1_Cardiometabolic	60	Weighted median	-0.138311	0.0599865672005632	0.870827756022968	0.774231195593625	0.979476137071118	0.0211273564045426
CHI3L1_P36222_OID20399_v1_Cardiometabolic	60	Inverse variance weighted	-0.151464	0.0453647932127467	0.859448534389582	0.786329526740161	0.93936671350316	0.000841386973505198
CHI3L1_P36222_OID20399_v1_Cardiometabolic	60	Simple mode	-0.20744	0.166923148490496	0.812661964200414	0.585898088387449	1.1271917098684	0.218884541546967
CHI3L1_P36222_OID20399_v1_Cardiometabolic	60	Weighted mode	-0.169834	0.0560499540913926	0.843804745808654	0.756016509560524	0.941786905504353	0.0036261890729695
CHL1_O00533_OID20366_v1_Cardiometabolic	72	MR Egger	0.0839717909951299	0.0850382303064678	1.0875982133128	0.920624402845713	1.28485609326112	0.326818519433182
CHL1_O00533_OID20366_v1_Cardiometabolic	72	Weighted median	0.182108462939423	0.0766496137828212	1.19974431461802	1.03238867573131	1.39422918353754	0.0175082828168649
CHL1_O00533_OID20366_v1_Cardiometabolic	72	Inverse variance weighted	0.101229484685564	0.0500848033388749	1.10653054444298	1.00306796674778	1.2206648865033	0.0432630322564911
CHL1_O00533_OID20366_v1_Cardiometabolic	72	Simple mode	0.00965632744991662	0.172121530577099	1.00970310020963	0.720577811761124	1.41483727910138	0.955418290517251
CHL1_O00533_OID20366_v1_Cardiometabolic	72	Weighted mode	0.181718530515523	0.104998166286733	1.19927658660645	0.976209684071732	1.47331495953151	0.087852529579138
CHRDL1_Q9BU40_OID20771_v1_Inflammation	9	MR Egger	0.808470175639805	1.07712906827013	2.24447171139797	0.271796189144859	18.5346721715102	0.477372875678563
CHRDL1_Q9BU40_OID20771_v1_Inflammation	9	Weighted median	0.681989783029191	0.339323455442894	1.97780923076112	1.01705969283247	3.84611579915224	0.0444468997531296
CHRDL1_Q9BU40_OID20771_v1_Inflammation	9	Inverse variance weighted	0.596851215139615	0.268521313843135	1.81639036383821	1.07309762207326	3.07453290919607	0.0262338018441774
CHRDL1_Q9BU40_OID20771_v1_Inflammation	9	Simple mode	0.759028273871193	0.492564241491708	2.13619941083128	0.813509528475946	5.60945847971202	0.161891547650643
CHRDL1_Q9BU40_OID20771_v1_Inflammation	9	Weighted mode	0.722371788325306	0.476873115012701	2.05931167440277	0.808722435089303	5.24378252454845	0.168284975660684
CKMT1A_CKMT1B_P12532_OID20721_v1_Inflammation	27	MR Egger	0.550980069018319	0.291950046376083	1.73495255814846	0.978982000832255	3.07468408659911	0.0707914095334335
CKMT1A_CKMT1B_P12532_OID20721_v1_Inflammation	27	Weighted median	0.420461889494363	0.18312236836358	1.52266469604609	1.06347521206454	2.18012394673889	0.0216718439620923
CKMT1A_CKMT1B_P12532_OID20721_v1_Inflammation	27	Inverse variance weighted	0.364660214539277	0.131129000067081	1.44002462558053	1.11365497289539	1.86204073321471	0.00542038761229157
CKMT1A_CKMT1B_P12532_OID20721_v1_Inflammation	27	Simple mode	0.490981144158614	0.365572886014122	1.63391854340621	0.798083769740945	3.34512479479846	0.190864436070957
CKMT1A_CKMT1B_P12532_OID20721_v1_Inflammation	27	Weighted mode	0.471249588168326	0.282299240243937	1.60199477672301	0.921219518892528	2.78585854078849	0.107051448892734
CLEC11A_Q9Y240_OID21112_v1_Neurology	31	MR Egger	0.13011410675996	0.133531429573397	1.13895833875585	0.876685030636349	1.47969459051888	0.337912326974816
CLEC11A_Q9Y240_OID21112_v1_Neurology	31	Weighted median	0.115496957365601	0.12332893808386	1.12243109939561	0.881414071923772	1.42935268793779	0.349018287687251
CLEC11A_Q9Y240_OID21112_v1_Neurology	31	Inverse variance weighted	0.182708780579042	0.088217311881886	1.20046475851907	1.00985105460537	1.42705761396607	0.0383474333019996
CLEC11A_Q9Y240_OID21112_v1_Neurology	31	Simple mode	0.196533440370594	0.227673876895513	1.21717602301493	0.779028725972947	1.90174947547941	0.394863550718355
CLEC11A_Q9Y240_OID21112_v1_Neurology	31	Weighted mode	0.155664535066743	0.117448982208409	1.16843416864624	0.928174551066466	1.47088541146855	0.195050732146326
CLEC3B_P05452_OID30756_v1_Inflammation_II	29	MR Egger	0.170257210876086	0.19820188541366	1.18560976383133	0.803949771884871	1.74845563895934	0.397898037253293
CLEC3B_P05452_OID30756_v1_Inflammation_II	29	Weighted median	0.258414767982858	0.128247140866577	1.29487578027473	1.00708	1.66492347943892	0.0439072806093697
CLEC3B_P05452_OID30756_v1_Inflammation_II	29	Inverse variance weighted	0.21455923959644	0.0936699522707841	1.23931553535212	1.03145057130878	1.4890708666885	0.0219872715733349
CLEC3B_P05452_OID30756_v1_Inflammation_II	29	Simple mode	0.233032259629221	0.251966803173542	1.2624222039426	0.770417522105443	2.0686313268835	0.362945021645772
CLEC3B_P05452_OID30756_v1_Inflammation_II	29	Weighted mode	0.274977813396169	0.142407724272391	1.31650146584713	0.995867237288091	1.74036864019884	0.0636753109146106
CLEC6A_Q6EIG7_OID21228_v1_Oncology	72	MR Egger	0.0337471202493634	0.0708095903255399	1.03432301430786	0.900288801309084	1.18831212425535	0.635138711691221
CLEC6A_Q6EIG7_OID21228_v1_Oncology	72	Weighted median	0.108880946963022	0.0738672337116212	1.11502959477955	0.964737890005953	1.28873449474092	0.140479242080107
CLEC6A_Q6EIG7_OID21228_v1_Oncology	72	Inverse variance weighted	0.116980179804112	0.0486100142014302	1.12409714964404	1.02194180916863	1.23646414159903	0.0161060401747815
CLEC6A_Q6EIG7_OID21228_v1_Oncology	72	Simple mode	0.228592489774784	0.134271147649944	1.25682976365816	0.966012060730686	1.6352	0.0930421616963044
CLEC6A_Q6EIG7_OID21228_v1_Oncology	72	Weighted mode	0.102266724975684	0.0613009479481022	1.10767887795186	0.982275821276506	1.24909161977154	0.0996662137888492
CLMP_Q9H6B4_OID21419_v1_Oncology	45	MR Egger	0.156321002311415	0.13119694942152	1.16920145922853	0.904091218233702	1.51205102393633	0.239992943964789
CLMP_Q9H6B4_OID21419_v1_Oncology	45	Weighted median	0.161897858428826	0.114516066085264	1.17574014324208	0.939362682410158	1.47159868101649	0.157433344017686
CLMP_Q9H6B4_OID21419_v1_Oncology	45	Inverse variance weighted	0.164869283135157	0.0739197600960571	1.17923896221614	1.02018762182546	1.36308704424421	0.0257221107746045
CLMP_Q9H6B4_OID21419_v1_Oncology	45	Simple mode	0.133943318711879	0.187881633039384	1.14332801250349	0.791120738886716	1.65233810709439	0.479663399157754
CLMP_Q9H6B4_OID21419_v1_Oncology	45	Weighted mode	0.165195032999309	0.102143701418492	1.17962316172096	0.9655990222512	1.44108555580802	0.112965546311099
CLPS_P04118_OID21156_v1_Neurology	129	MR Egger	0.0729761188743288	0.065254948338742	1.07570484756531	0.946557481235731	1.22247295279401	0.265539905185722
CLPS_P04118_OID21156_v1_Neurology	129	Weighted median	0.129630585894161	0.0606513083385585	1.13840776175225	1.01081205388076	1.28210998972777	0.0325728690410977
CLPS_P04118_OID21156_v1_Neurology	129	Inverse variance weighted	0.156526872615129	0.0416000390582207	1.16944218786663	1.07787423015033	1.26878905952835	0.00016811455956567
CLPS_P04118_OID21156_v1_Neurology	129	Simple mode	0.282897609744412	0.136483468473066	1.32696928613674	1.01550904763644	1.73395548808605	0.0402010485473071
CLPS_P04118_OID21156_v1_Neurology	129	Weighted mode	0.143597339450483	0.0657284658621496	1.15441917586645	1.01487915506934	1.31314514339111	0.0307316845509933
CNTN2_Q02246_OID21426_v1_Oncology	113	MR Egger	0.01162537883163	0.0434383241184762	1.01169321617151	0.929123382855718	1.10160090956014	0.789481148306644
CNTN2_Q02246_OID21426_v1_Oncology	113	Weighted median	-0.0384638	0.0444364598724673	0.962266546718291	0.882003502006709	1.04983359456786	0.386714599424467
CNTN2_Q02246_OID21426_v1_Oncology	113	Inverse variance weighted	-0.0633912	0.0306044310523446	0.938576204675542	0.883931319055479	0.996599252670958	0.0383299458521225
CNTN2_Q02246_OID21426_v1_Oncology	113	Simple mode	-0.0483666	0.0784371334818164	0.95278444022734	0.817010466529485	1.11112186040344	0.538731020626048
CNTN2_Q02246_OID21426_v1_Oncology	113	Weighted mode	-0.0177755	0.0375793551097004	0.982381572755575	0.91262427122495	1.05747083977327	0.637125298370576
CNTN4_Q8IWV2_OID21117_v1_Neurology	91	MR Egger	0.0563510817282491	0.103186901327268	1.05796905214573	0.86424823287606	1.29511229843457	0.586358794426477
CNTN4_Q8IWV2_OID21117_v1_Neurology	91	Weighted median	0.0124069761310557	0.0892438575778878	1.01248426195647	0.850006753086571	1.20601910159781	0.889431732265168
CNTN4_Q8IWV2_OID21117_v1_Neurology	91	Inverse variance weighted	0.11905849355884	0.0592392955522051	1.12643580560042	1.00295382825537	1.26512067494256	0.0444535094400003
CNTN4_Q8IWV2_OID21117_v1_Neurology	91	Simple mode	0.0816229998825877	0.194408916429763	1.08504666998953	0.741249149305262	1.58830034025511	0.675594069559885
CNTN4_Q8IWV2_OID21117_v1_Neurology	91	Weighted mode	0.00653774826237807	0.0884911159854857	1.00655916598767	0.846280140311413	1.1971938207849	0.941269606005264
CNTNAP2_Q9UHC6_OID20556_v1_Inflammation	96	MR Egger	-0.115362	0.069410374911769	0.891043861664694	0.777706589626834	1.02089807904456	0.0998396689445003
CNTNAP2_Q9UHC6_OID20556_v1_Inflammation	96	Weighted median	-0.0993666	0.0665959321522041	0.905410745801745	0.794617348771376	1.03165205224978	0.135677713615566
CNTNAP2_Q9UHC6_OID20556_v1_Inflammation	96	Inverse variance weighted	-0.118821	0.04134389835332	0.887966382444419	0.818849121374039	0.962917680156195	0.00405339058843966
CNTNAP2_Q9UHC6_OID20556_v1_Inflammation	96	Simple mode	-0.119965	0.108560743998171	0.886951737670902	0.716953877769875	1.09725800968461	0.271930130295772
CNTNAP2_Q9UHC6_OID20556_v1_Inflammation	96	Weighted mode	-0.11029	0.0618785014955396	0.895574150841734	0.793285481693212	1.01105223550035	0.0778839263663488
COL3A1_P02461_OID30379_v1_Cardiometabolic_II	19	MR Egger	0.665792172083591	0.318040909701447	1.94603150272527	1.04334509508911	3.62970854746364	0.0516129950906954
COL3A1_P02461_OID30379_v1_Cardiometabolic_II	19	Weighted median	0.214101367486995	0.168178845549286	1.23874821722317	0.890894584650459	1.72242280075778	0.202997582059039
COL3A1_P02461_OID30379_v1_Cardiometabolic_II	19	Inverse variance weighted	0.261082044491026	0.122319596160109	1.29833418223124	1.02156486806718	1.6500877246683	0.0328079798949801
COL3A1_P02461_OID30379_v1_Cardiometabolic_II	19	Simple mode	0.151399401988891	0.291960622823509	1.16346125403423	0.656492887841902	2.06192955736162	0.610383242960967
COL3A1_P02461_OID30379_v1_Cardiometabolic_II	19	Weighted mode	0.347782544296868	0.168413986682593	1.41592431544261	1.0178485453591	1.96968564351025	0.0536291028227543
COL5A1_P20908_OID30587_v1_Inflammation_II	44	MR Egger	0.230991293336411	0.176185504859732	1.25984827032642	0.891961511220807	1.77946878231559	0.196957762776768
COL5A1_P20908_OID30587_v1_Inflammation_II	44	Weighted median	0.30443934481072	0.13124277000494	1.35586461733539	1.04833533996764	1.75360763913461	0.0203589716575743
COL5A1_P20908_OID30587_v1_Inflammation_II	44	Inverse variance weighted	0.262694247126563	0.0852886231892888	1.30042904824214	1.10024022868627	1.53704224352096	0.00206957509672015
COL5A1_P20908_OID30587_v1_Inflammation_II	44	Simple mode	0.393752315386044	0.250394086156534	1.48253330250731	0.907537770357334	2.42183307938558	0.123157630624412
COL5A1_P20908_OID30587_v1_Inflammation_II	44	Weighted mode	0.333622379836561	0.137113458065615	1.39601588028327	1.0670309751484	1.82643276848832	0.0191987312372027
COL6A3_P12111_OID20292_v1_Cardiometabolic	10	MR Egger	1.22162351326879	0.719858706016209	3.3926913442343	0.827538579948882	13.9091455505958	0.128126986593829
COL6A3_P12111_OID20292_v1_Cardiometabolic	10	Weighted median	0.757804898088657	0.30417707682562	2.13358763412333	1.17541094574488	3.87285502909726	0.0127266535547545
COL6A3_P12111_OID20292_v1_Cardiometabolic	10	Inverse variance weighted	0.691670583992451	0.22621601789361	1.99704898612967	1.28182800614007	3.11134148567334	0.00223141906961435
COL6A3_P12111_OID20292_v1_Cardiometabolic	10	Simple mode	0.740090529212083	0.47101758845949	2.09612526647399	0.832681598842195	5.27661610255341	0.15057108434367
COL6A3_P12111_OID20292_v1_Cardiometabolic	10	Weighted mode	0.818969933812046	0.387499061941931	2.26816227654796	1.06127580329408	4.84752417494784	0.0637091562116389
COX6B1_P14854_OID30317_v1_Cardiometabolic_II	3	MR Egger	-14.6116	11.3591911263091	4.51071629417205e-07	9.66288527963593e-17	2105.64038562981	0.420686055533571
COX6B1_P14854_OID30317_v1_Cardiometabolic_II	3	Weighted median	1.01869882087738	0.573894312097672	2.76958868741901	0.899304105518561	8.52950792775071	0.0758874101817257
COX6B1_P14854_OID30317_v1_Cardiometabolic_II	3	Inverse variance weighted	1.2608159864104	0.452475038589384	3.52829935738175	1.45348614785987	8.56485379900619	0.00532826921791745
COX6B1_P14854_OID30317_v1_Cardiometabolic_II	3	Simple mode	0.861323580503344	0.695419917729872	2.36629059800948	0.605500761563129	9.2474387311638	0.34115522839776
COX6B1_P14854_OID30317_v1_Cardiometabolic_II	3	Weighted mode	0.869663677061886	0.730751083831619	2.38610821563333	0.569721036702005	9.99350919122005	0.356124193639509
CPA1_P15085_OID20280_v1_Cardiometabolic	78	MR Egger	0.0704199228701936	0.143675036946233	1.07295864654171	0.809625770710444	1.42194	0.62545154984596
CPA1_P15085_OID20280_v1_Cardiometabolic	78	Weighted median	-0.0199384	0.110038863524525	0.980259065251931	0.790085143724114	1.21620795257495	0.856215246063105
CPA1_P15085_OID20280_v1_Cardiometabolic	78	Inverse variance weighted	-0.151285	0.0687768980855172	0.859602315169816	0.751196401710805	0.983652395781541	0.0278314095077783
CPA1_P15085_OID20280_v1_Cardiometabolic	78	Simple mode	0.0578044882962465	0.205276154911792	1.05950782927837	0.708548494602376	1.58430488365109	0.779010404845267
CPA1_P15085_OID20280_v1_Cardiometabolic	78	Weighted mode	0.0813850178777189	0.127595208263405	1.08478847913123	0.844760950623669	1.39301662036707	0.525471718389713
CPA4_Q9UI42_OID30606_v1_Inflammation_II	76	MR Egger	-0.0737494	0.0635161716435803	0.928904482621321	0.820172119196481	1.05205177991094	0.249328349629153
CPA4_Q9UI42_OID30606_v1_Inflammation_II	76	Weighted median	-0.05244	0.066849802226827	0.948911281459104	0.832380522909665	1.08175599416095	0.432779235645281
CPA4_Q9UI42_OID30606_v1_Inflammation_II	76	Inverse variance weighted	-0.091213	0.0444309477154848	0.912823251642197	0.836693331759014	0.995880159564397	0.0400807153222172
CPA4_Q9UI42_OID30606_v1_Inflammation_II	76	Simple mode	-0.00507989	0.127614399100037	0.994932988399185	0.774758342277206	1.2776779511601	0.968353106765616
CPA4_Q9UI42_OID30606_v1_Inflammation_II	76	Weighted mode	-0.0482511	0.0585331320683067	0.952894438602705	0.8496115042644	1.06873295213455	0.412360871967476
CR1_P17927_OID30697_v1_Inflammation_II	105	MR Egger	0.0338976978845791	0.056450928005865	1.03447877194792	0.926124947431665	1.15550966700402	0.549504850770596
CR1_P17927_OID30697_v1_Inflammation_II	105	Weighted median	0.0494877722067043	0.0639248863206708	1.05073274399347	0.926996948723777	1.19098482559194	0.438839118874584
CR1_P17927_OID30697_v1_Inflammation_II	105	Inverse variance weighted	0.114079748536313	0.0377026252546451	1.12084150678967	1.0410008467543	1.2068056306193	0.00247994866182543
CR1_P17927_OID30697_v1_Inflammation_II	105	Simple mode	0.143251462364125	0.115166442495997	1.15401995776964	0.920834674892903	1.44625533686113	0.216345742106085
CR1_P17927_OID30697_v1_Inflammation_II	105	Weighted mode	0.0854953194080648	0.0582810165719501	1.08925646296712	0.971673464269014	1.22106827627347	0.145407
CR2_P20023_OID20393_v1_Cardiometabolic	118	MR Egger	0.101634202293888	0.158066701067944	1.10697846747352	0.812063668997212	1.50899661471523	0.52150409004613
CR2_P20023_OID20393_v1_Cardiometabolic	118	Weighted median	0.0743814927033386	0.0972061743692087	1.07721767780283	0.890348242517168	1.30330793049053	0.444156575171301
CR2_P20023_OID20393_v1_Cardiometabolic	118	Inverse variance weighted	0.14134432194648	0.0686047257973305	1.15182117702367	1.00690277446067	1.31759694926932	0.0393726477500005
CR2_P20023_OID20393_v1_Cardiometabolic	118	Simple mode	0.0921192894043186	0.232708197557311	1.09649561458828	0.694898992989066	1.73018329993501	0.692931076185709
CR2_P20023_OID20393_v1_Cardiometabolic	118	Weighted mode	0.120462339113717	0.159521957802352	1.12801825799846	0.825141247526618	1.54206954771925	0.45167895130098
CRELD2_Q6UXH1_OID20751_v1_Inflammation	73	MR Egger	-0.179336	0.0885240028090593	0.835825146039491	0.70268758484092	0.994188156761147	0.0465398619055126
CRELD2_Q6UXH1_OID20751_v1_Inflammation	73	Weighted median	-0.243864	0.0927130194021099	0.783594470384715	0.653389945668787	0.939745550245669	0.00853079395019424
CRELD2_Q6UXH1_OID20751_v1_Inflammation	73	Inverse variance weighted	-0.154382	0.0591510582490613	0.856944192780018	0.763136353986245	0.962283274415509	0.0090550188774601
CRELD2_Q6UXH1_OID20751_v1_Inflammation	73	Simple mode	-0.338797	0.184826236984788	0.712627018681346	0.496060920909804	1.02373971895077	0.0709280065712463
CRELD2_Q6UXH1_OID20751_v1_Inflammation	73	Weighted mode	-0.260141	0.0812259959936151	0.770942498000759	0.657477693717821	0.903988592925156	0.00202836107108988
CRISP3_P54108_OID30715_v1_Inflammation_II	190	MR Egger	0.0243086186193578	0.052242853716362	1.02460648173887	0.92488361161754	1.13508167863982	0.642254904535656
CRISP3_P54108_OID30715_v1_Inflammation_II	190	Weighted median	0.0777477973483539	0.052112223550335	1.08085003104896	0.97590292382461	1.19708298960737	0.135717458499767
CRISP3_P54108_OID30715_v1_Inflammation_II	190	Inverse variance weighted	0.105756275339921	0.0346922831577318	1.11155093111699	1.03848134457094	1.18976183725045	0.00230056420657157
CRISP3_P54108_OID30715_v1_Inflammation_II	190	Simple mode	0.0202302889988908	0.0993065246006746	1.02043630822627	0.839952027228056	1.23970206082228	0.838794920519254
CRISP3_P54108_OID30715_v1_Inflammation_II	190	Weighted mode	0.061734118994889	0.0508955697135524	1.06367949495427	0.96269253386161	1.17526004221492	0.226660250586192
CRTAP_O75718_OID30902_v1_Neurology_II	25	MR Egger	1.01554995952093	0.615823153299304	2.76088135291717	0.825749829701907	9.23096266049177	0.112721783904762
CRTAP_O75718_OID30902_v1_Neurology_II	25	Weighted median	0.548842680117291	0.190151603036664	1.73124824999068	1.19261161652746	2.51315722701313	0.00389747590198461
CRTAP_O75718_OID30902_v1_Neurology_II	25	Inverse variance weighted	0.290470344044253	0.142376914090152	1.33705621658282	1.01147695303468	1.76743456283325	0.0413353301119632
CRTAP_O75718_OID30902_v1_Neurology_II	25	Simple mode	0.68454552802441	0.323604888507865	1.98287047166977	1.05156543728945	3.73897350368851	0.0449683758378937
CRTAP_O75718_OID30902_v1_Neurology_II	25	Weighted mode	0.632460372300549	0.275141579946009	1.88223588798226	1.09766245260098	3.22759690796879	0.0305366175112429
CSF2_P04141_OID30072_v1_Cardiometabolic_II	24	MR Egger	0.578015662271474	0.168022386869469	1.7824978413317	1.28234673238286	2.47772187826933	0.0023363401701187
CSF2_P04141_OID30072_v1_Cardiometabolic_II	24	Weighted median	0.419121882282182	0.13318719395181	1.52062568082431	1.17125401454372	1.97421091622314	0.00165032142489497
CSF2_P04141_OID30072_v1_Cardiometabolic_II	24	Inverse variance weighted	0.218388809323426	0.103953327310353	1.24407067987583	1.01474798172338	1.52521796978416	0.0356554351992075
CSF2_P04141_OID30072_v1_Cardiometabolic_II	24	Simple mode	0.18621910123302	0.267044629564942	1.20468617969142	0.713774371622284	2.03323185762615	0.492583582406387
CSF2_P04141_OID30072_v1_Cardiometabolic_II	24	Weighted mode	0.391425405528233	0.137681419276485	1.47908759163521	1.12926821290966	1.93727236693614	0.00921149441778177
CSF2RB_P32927_OID30553_v1_Inflammation_II	77	MR Egger	-0.0566331	0.0320422949230356	0.944940718174836	0.887420815490691	1.00618888500046	0.081220870662252
CSF2RB_P32927_OID30553_v1_Inflammation_II	77	Weighted median	-0.0404039	0.0322054785541709	0.960401465343803	0.901652014279818	1.02297888767126	0.209636460074107
CSF2RB_P32927_OID30553_v1_Inflammation_II	77	Inverse variance weighted	-0.0474472	0.0240575301051451	0.953660811566657	0.909736780790084	0.999705588168177	0.0485822580309471
CSF2RB_P32927_OID30553_v1_Inflammation_II	77	Simple mode	-0.0550353	0.0788764861210735	0.946451773656014	0.810881643306468	1.10468767822145	0.487469159820306
CSF2RB_P32927_OID30553_v1_Inflammation_II	77	Weighted mode	-0.0392789	0.0293899359609077	0.961482478335035	0.907662004097783	1.01849427647264	0.185381304018587
CSNK1D_P48730_OID30492_v1_Inflammation_II	15	MR Egger	0.432787440649795	0.917698841011804	1.54154851532272	0.255150353061203	9.3136137049501	0.645028734499182
CSNK1D_P48730_OID30492_v1_Inflammation_II	15	Weighted median	0.396588461771364	0.272110038544174	1.48674395216129	0.872190676055875	2.53432	0.144990494418692
CSNK1D_P48730_OID30492_v1_Inflammation_II	15	Inverse variance weighted	0.396981787146844	0.192446158662882	1.48732884130284	1.0199843827684	2.16880485578332	0.039129732054163
CSNK1D_P48730_OID30492_v1_Inflammation_II	15	Simple mode	0.490870817424169	0.478142919230815	1.63373828845262	0.639998590952073	4.17047917431425	0.322011659804535
CSNK1D_P48730_OID30492_v1_Inflammation_II	15	Weighted mode	0.456376911609647	0.483319048904004	1.5783451292721	0.612057880940219	4.07015974252322	0.361050652517959
CSTB_P04080_OID20294_v1_Cardiometabolic	66	MR Egger	-0.00610977	0.0571251709220616	0.993908856381205	0.888629309321027	1.11166130177248	0.915159972141189
CSTB_P04080_OID20294_v1_Cardiometabolic	66	Weighted median	-0.041653	0.0513605961535183	0.959202577720054	0.867343873413301	1.06078985891029	0.417370764609107
CSTB_P04080_OID20294_v1_Cardiometabolic	66	Inverse variance weighted	-0.0710965	0.0349637685354477	0.931372056769039	0.869683926223908	0.9974358292404	0.0420088843448387
CSTB_P04080_OID20294_v1_Cardiometabolic	66	Simple mode	-0.0880713	0.0879359983478532	0.915695616345902	0.770723324309105	1.08793705256909	0.320280613985513
CSTB_P04080_OID20294_v1_Cardiometabolic	66	Weighted mode	-0.0549252	0.0453508119199594	0.946555957047503	0.866049873459814	1.03454570836986	0.230235154619469
CTBS_Q01459_OID30710_v1_Inflammation_II	101	MR Egger	0.138085360062853	0.058794086897674	1.14807354572169	1.02311198654679	1.28829774620738	0.0208302707712805
CTBS_Q01459_OID30710_v1_Inflammation_II	101	Weighted median	0.131067017932802	0.0592780707829398	1.14004418215624	1.01499328752725	1.28050180551898	0.0270320950341386
CTBS_Q01459_OID30710_v1_Inflammation_II	101	Inverse variance weighted	0.101136864509961	0.0392148754706255	1.10642806213568	1.0245727624618	1.19482295599963	0.009907434764268
CTBS_Q01459_OID30710_v1_Inflammation_II	101	Simple mode	0.0547934282739324	0.0895403642546498	1.05632238579779	0.886294770466627	1.25896825742306	0.541965580517616
CTBS_Q01459_OID30710_v1_Inflammation_II	101	Weighted mode	0.121107350094461	0.056718476233774	1.12874607686169	1.00998869394461	1.26146729529681	0.0351844181393987
CTSB_P07858_OID20276_v1_Cardiometabolic	335	MR Egger	-0.178463	0.0511727662345701	0.836555346949919	0.756720573160102	0.924812768850722	0.000553079310547974
CTSB_P07858_OID20276_v1_Cardiometabolic	335	Weighted median	-0.353805	0.040816633098943	0.70201179132496	0.648038170538877	0.760480751850581	4.39161971381857e-18
CTSB_P07858_OID20276_v1_Cardiometabolic	335	Inverse variance weighted	-0.361109	0.0231564013702211	0.69690310326278	0.665980129627851	0.729261900964954	7.95357438141284e-55
CTSB_P07858_OID20276_v1_Cardiometabolic	335	Simple mode	-0.424062	0.111308631270019	0.654383592428463	0.526119721887521	0.813917190755168	0.000165533489426452
CTSB_P07858_OID20276_v1_Cardiometabolic	335	Weighted mode	-0.268296	0.0639861544938783	0.764681142203456	0.674550185277395	0.866855071726236	3.52960781722673e-05
CTSS_P25774_OID21056_v1_Neurology	78	MR Egger	0.117835817605466	0.0932094063663941	1.12505938125983	0.937203705204872	1.35056936323578	0.210019893305475
CTSS_P25774_OID21056_v1_Neurology	78	Weighted median	0.152661294749105	0.0689914427273145	1.16493034408959	1.01759099773951	1.33360329404967	0.02691440637741
CTSS_P25774_OID21056_v1_Neurology	78	Inverse variance weighted	0.114795484567435	0.052499663356276	1.12164402060102	1.01196718493819	1.24320761352245	0.0287721261054115
CTSS_P25774_OID21056_v1_Neurology	78	Simple mode	0.199662691848267	0.136261822102025	1.22099083852912	0.934811401680922	1.5947801076146	0.146914137651712
CTSS_P25774_OID21056_v1_Neurology	78	Weighted mode	0.172467645515838	0.0782054740582935	1.18823337531513	1.01937012940572	1.38506957726524	0.0304159067046138
CTSZ_Q9UBR2_OID20365_v1_Cardiometabolic	61	MR Egger	0.226870341187281	0.0822957955573095	1.25466717873671	1.06776809974971	1.47428053878753	0.00775610633381886
CTSZ_Q9UBR2_OID20365_v1_Cardiometabolic	61	Weighted median	0.143629391602772	0.0820187507385369	1.15445617807868	0.983018479581075	1.35579248486966	0.0799153383515814
CTSZ_Q9UBR2_OID20365_v1_Cardiometabolic	61	Inverse variance weighted	0.188651831857989	0.0563972995219227	1.2076204243205	1.08124496736718	1.3487665915219	0.000822675009517509
CTSZ_Q9UBR2_OID20365_v1_Cardiometabolic	61	Simple mode	0.126650393784892	0.161407467062264	1.13502013831514	0.827200441369906	1.55738639627349	0.435738635606574
CTSZ_Q9UBR2_OID20365_v1_Cardiometabolic	61	Weighted mode	0.164256513529074	0.0708095587853064	1.17851658177078	1.0257969044858	1.35397302081438	0.023777977643675
CWC15_Q9P013_OID31479_v1_Oncology_II	9	MR Egger	-1.01869	1.62849417638119	0.361066915236029	0.014838345112833	8.78597419636176	0.551456041451825
CWC15_Q9P013_OID31479_v1_Oncology_II	9	Weighted median	0.555345608001652	0.351076825824849	1.74254311756178	0.875670876312633	3.46757737261762	0.113687244501985
CWC15_Q9P013_OID31479_v1_Oncology_II	9	Inverse variance weighted	0.564993235743535	0.275355989900486	1.75943588140603	1.02561814133663	3.01829159997567	0.0401828132655179
CWC15_Q9P013_OID31479_v1_Oncology_II	9	Simple mode	1.07425184304177	0.554976517791495	2.92780162576855	0.986588613076724	8.68854783669224	0.088938787615747
CWC15_Q9P013_OID31479_v1_Oncology_II	9	Weighted mode	0.5751001825999	0.550643030839162	1.77730857338902	0.6040126377465	5.22973455791805	0.326822240644365
DCBLD2_Q96PD2_OID21474_v1_Oncology	82	MR Egger	-0.25065	0.128379049066022	0.778294786299938	0.605153665863372	1.00097348582934	0.0543862820256752
DCBLD2_Q96PD2_OID21474_v1_Oncology	82	Weighted median	-0.30395	0.107083878293397	0.737897463199783	0.598197205540951	0.910222684347528	0.00453356507706151
DCBLD2_Q96PD2_OID21474_v1_Oncology	82	Inverse variance weighted	-0.170867	0.0743828278153256	0.84293364115805	0.72858033558706	0.975235109555141	0.0216113423481657
DCBLD2_Q96PD2_OID21474_v1_Oncology	82	Simple mode	-0.0258227	0.204301217593959	0.974507816299314	0.652951042497775	1.45442065670903	0.899732145438888
DCBLD2_Q96PD2_OID21474_v1_Oncology	82	Weighted mode	-0.231485	0.121235799831186	0.793354768130628	0.62556067563477	1.00615625730777	0.0597542752741624
DDR1_Q08345_OID21009_v1_Neurology	115	MR Egger	0.0584640121804548	0.0782877347123836	1.06020683047594	0.909391169528255	1.23603413036322	0.456745058776942
DDR1_Q08345_OID21009_v1_Neurology	115	Weighted median	0.0588997552462891	0.0714208814938445	1.0606689089171	0.922115149264213	1.22004126625735	0.409550246376753
DDR1_Q08345_OID21009_v1_Neurology	115	Inverse variance weighted	0.179072355747885	0.0459826287412436	1.19610728627419	1.09302207250603	1.30891468366966	9.84632321634079e-05
DDR1_Q08345_OID21009_v1_Neurology	115	Simple mode	0.20052716510767	0.158197428937607	1.22204680882229	0.896246496976318	1.66628088142162	0.20753266587832
DDR1_Q08345_OID21009_v1_Neurology	115	Weighted mode	0.060355359066536	0.0842865842382285	1.06221394684169	0.900462871642761	1.25302053465746	0.475410453898048
DKK3_Q9UBP4_OID20264_v1_Cardiometabolic	83	MR Egger	0.0854268884311279	0.09729627885607	1.08918192663355	0.900078031160457	1.31801602553911	0.382536471695135
DKK3_Q9UBP4_OID20264_v1_Cardiometabolic	83	Weighted median	0.130714607768903	0.0778980016990778	1.13964248978355	0.978274008829256	1.32762906179462	0.0933426860888837
DKK3_Q9UBP4_OID20264_v1_Cardiometabolic	83	Inverse variance weighted	0.118590159878632	0.0547958954186466	1.12590838128899	1.01125304939613	1.2535632736176	0.0304477671079629
DKK3_Q9UBP4_OID20264_v1_Cardiometabolic	83	Simple mode	0.342848522170531	0.16786083621745	1.40895532026729	1.01393751723273	1.95786728547874	0.044319387763662
DKK3_Q9UBP4_OID20264_v1_Cardiometabolic	83	Weighted mode	0.147473711013227	0.0763993484828871	1.15890281804843	0.997733560248661	1.34610661121378	0.057026570972928
DNAJA2_O60884_OID20627_v1_Inflammation	6	MR Egger	-3.0203	3.15403605661908	0.0487864584731012	0.000100816032145719	23.6085320924694	0.392492687421813
DNAJA2_O60884_OID20627_v1_Inflammation	6	Weighted median	-1.03387	0.469109335566223	0.355629085260418	0.141802322782156	0.891889806893039	0.0275318391151737
DNAJA2_O60884_OID20627_v1_Inflammation	6	Inverse variance weighted	-0.85409	0.427118046214522	0.425670507501397	0.184290666394511	0.983204328799876	0.0455372897100672
DNAJA2_O60884_OID20627_v1_Inflammation	6	Simple mode	-1.50706	0.830822221271363	0.221559489780112	0.0434790658146424	1.12901707044249	0.129413981170079
DNAJA2_O60884_OID20627_v1_Inflammation	6	Weighted mode	-1.45222	0.57858734846129	0.234050642317276	0.0753019709514545	0.727467056665021	0.0538321444406038
DNAJA4_Q8WW22_OID31130_v1_Neurology_II	14	MR Egger	0.180485147847433	0.401419795958785	1.19779833146481	0.545366271510173	2.63074729371695	0.661000155639177
DNAJA4_Q8WW22_OID31130_v1_Neurology_II	14	Weighted median	0.555537360085184	0.219974607717717	1.74287728587293	1.13245419196217	2.68233475152632	0.0115546505005197
DNAJA4_Q8WW22_OID31130_v1_Neurology_II	14	Inverse variance weighted	0.530010667762235	0.166325824848886	1.69895043252114	1.22631293173594	2.3537487842339	0.00143965305559423
DNAJA4_Q8WW22_OID31130_v1_Neurology_II	14	Simple mode	0.528431490860959	0.295629701637729	1.69626960654804	0.950276081645217	3.02788908789234	0.097183438679537
DNAJA4_Q8WW22_OID31130_v1_Neurology_II	14	Weighted mode	0.49822162479715	0.243877563086104	1.64579183126918	1.02042744286669	2.65440798442563	0.0618816165891682
DNER_Q8NFT8_OID20712_v1_Inflammation	71	MR Egger	-0.223583	0.123133739059925	0.799648382396996	0.628182029580908	1.01791758655805	0.073749674817653
DNER_Q8NFT8_OID20712_v1_Inflammation	71	Weighted median	-0.189849	0.098322641768847	0.827083682571781	0.682111749609782	1.00286707913745	0.0534976695776154
DNER_Q8NFT8_OID20712_v1_Inflammation	71	Inverse variance weighted	-0.161963	0.065847704322049	0.850472641553358	0.747497337482033	0.967633833275202	0.0139068277296427
DNER_Q8NFT8_OID20712_v1_Inflammation	71	Simple mode	-0.0219659	0.166717843710662	0.978273599009428	0.705581588408346	1.35635516890074	0.895556119707338
DNER_Q8NFT8_OID20712_v1_Inflammation	71	Weighted mode	-0.137409	0.0924802982450666	0.871613950782832	0.727115418080749	1.04482845543909	0.14181797415405
DPP10_Q8N608_OID20527_v1_Inflammation	56	MR Egger	0.183997076743826	0.130089485591811	1.20201230930126	0.93148209108271	1.55111258234965	0.162988076635576
DPP10_Q8N608_OID20527_v1_Inflammation	56	Weighted median	0.142011964292749	0.107409501924575	1.15259043838394	0.933783506404406	1.42266886226061	0.186116683992557
DPP10_Q8N608_OID20527_v1_Inflammation	56	Inverse variance weighted	0.144530795507967	0.0679478221309455	1.15549727854149	1.01141775474434	1.32010136706992	0.0334130185817822
DPP10_Q8N608_OID20527_v1_Inflammation	56	Simple mode	0.184424275005485	0.190235907602189	1.20252591656854	0.828251767410629	1.74592875852215	0.336564585446908
DPP10_Q8N608_OID20527_v1_Inflammation	56	Weighted mode	0.13822324728528	0.0987999617036888	1.14823186130865	0.946083282199095	1.39357330599874	0.167420928107165
DPP6_P42658_OID21354_v1_Oncology	45	MR Egger	-0.127365	0.157510941483617	0.880411975720112	0.646561619965609	1.1988420330805	0.423189466235904
DPP6_P42658_OID21354_v1_Oncology	45	Weighted median	-0.161419	0.120182929665834	0.850935069298304	0.672348820665908	1.07695658846335	0.179234854954532
DPP6_P42658_OID21354_v1_Oncology	45	Inverse variance weighted	-0.213294	0.0793608923343844	0.807918278565175	0.691534861424122	0.943888705040124	0.0071956602496364
DPP6_P42658_OID21354_v1_Oncology	45	Simple mode	-0.181234	0.198140238701523	0.834240445742881	0.56575821061196	1.2301317210412	0.365348628712183
DPP6_P42658_OID21354_v1_Oncology	45	Weighted mode	-0.21438	0.119291732698544	0.80704143529982	0.638781985697388	1.01962154987781	0.0791840514290673
DSG2_Q14126_OID21113_v1_Neurology	69	MR Egger	-0.0501572	0.101276289868198	0.951079938275455	0.779846096427915	1.15991226106452	0.622043502962764
DSG2_Q14126_OID21113_v1_Neurology	69	Weighted median	-0.0536851	0.0946049999725743	0.947730530367044	0.787327588297143	1.14081250490973	0.570398001412344
DSG2_Q14126_OID21113_v1_Neurology	69	Inverse variance weighted	-0.125918	0.0608490378239838	0.881686804820791	0.782561710242887	0.993367822141233	0.0385125980684172
DSG2_Q14126_OID21113_v1_Neurology	69	Simple mode	-0.104941	0.190778869309112	0.900377802342217	0.619484618443548	1.30863650656481	0.58407696812177
DSG2_Q14126_OID21113_v1_Neurology	69	Weighted mode	-0.0352773	0.0913460790629462	0.965337705930751	0.807093626483934	1.15460815934246	0.700558913858037
DSG3_P32926_OID21460_v1_Oncology	82	MR Egger	0.173908386044782	0.135952992035236	1.18994654511703	0.911594989191356	1.55329153519374	0.204531467902818
DSG3_P32926_OID21460_v1_Oncology	82	Weighted median	0.27099975188867	0.108089858304355	1.31127474504243	1.06092761041868	1.62069630397075	0.0121701838806141
DSG3_P32926_OID21460_v1_Oncology	82	Inverse variance weighted	0.171153401625446	0.0707536075049497	1.18667277259219	1.03300944246708	1.36319399544744	0.0155629831707491
DSG3_P32926_OID21460_v1_Oncology	82	Simple mode	0.271919921358723	0.218819193927907	1.31248189533591	0.854733376746669	2.01537552229589	0.217575098863783
DSG3_P32926_OID21460_v1_Oncology	82	Weighted mode	0.206466174009159	0.114324674276061	1.22932615033866	0.982543965566302	1.53809176674902	0.074638773573684
DYNC1H1_Q14204_OID31341_v1_Oncology_II	16	MR Egger	0.403886834668146	0.184442256028615	1.4976344570678	1.04329086736764	2.14984050675715	0.0459725602335235
DYNC1H1_Q14204_OID31341_v1_Oncology_II	16	Weighted median	0.243400581667382	0.131604952345443	1.27557949554997	0.985560144396721	1.6509424196161	0.0643886927248938
DYNC1H1_Q14204_OID31341_v1_Oncology_II	16	Inverse variance weighted	0.301841432403344	0.105749798557295	1.35234677132972	1.0991881119361	1.6638114714547	0.00431320593430134
DYNC1H1_Q14204_OID31341_v1_Oncology_II	16	Simple mode	0.273855580868527	0.203620851079693	1.31502487377427	0.882283993023106	1.96001563251725	0.198631769570418
DYNC1H1_Q14204_OID31341_v1_Oncology_II	16	Weighted mode	0.241654083912879	0.125486309768118	1.27335364311423	0.995710144597216	1.62841516603024	0.0733076273203024
DYNLT1_P63172_OID30925_v1_Neurology_II	129	MR Egger	0.110405404077834	0.0519763592188877	1.11673070588456	1.00856823902881	1.23649290271751	0.035596573579692
DYNLT1_P63172_OID30925_v1_Neurology_II	129	Weighted median	0.099321016255542	0.0525951465224893	1.10442077968213	0.996241609567198	1.22434683201356	0.0589714001847081
DYNLT1_P63172_OID30925_v1_Neurology_II	129	Inverse variance weighted	0.0923144797789011	0.0346510138129302	1.09670966086723	1.0246985714483	1.17378135751621	0.00771898835062885
DYNLT1_P63172_OID30925_v1_Neurology_II	129	Simple mode	0.218771644772382	0.101471636298961	1.24454704541208	1.02008630618799	1.51839833438417	0.0329547949651202
DYNLT1_P63172_OID30925_v1_Neurology_II	129	Weighted mode	0.12069343673873	0.0498879522739851	1.12827897046271	1.02317757067784	1.24417644763756	0.0169565661281354
DYNLT3_P51808_OID31415_v1_Oncology_II	25	MR Egger	0.242718154812641	0.168671422971547	1.27470930280207	0.915872758206731	1.77413706444512	0.16362157262711
DYNLT3_P51808_OID31415_v1_Oncology_II	25	Weighted median	0.227422749309265	0.11855767602242	1.2553604585457	0.995061936825866	1.58375054110411	0.0550798671367501
DYNLT3_P51808_OID31415_v1_Oncology_II	25	Inverse variance weighted	0.283266131499224	0.0948442238523839	1.32745839330443	1.1022697387105	1.59865205772213	0.00282056026840306
DYNLT3_P51808_OID31415_v1_Oncology_II	25	Simple mode	0.284062919828546	0.219954206769717	1.32851651815466	0.863253122615647	2.04454069469448	0.2088430294779
DYNLT3_P51808_OID31415_v1_Oncology_II	25	Weighted mode	0.219341339895686	0.107001754002702	1.24525625979338	1.00966430271001	1.53582051815887	0.0514539888204282
ECHDC3_Q96DC8_OID30293_v1_Cardiometabolic_II	68	MR Egger	0.0769920065523338	0.0836366559329689	1.08003344316729	0.916735912369204	1.27241904960958	0.360636223638447
ECHDC3_Q96DC8_OID30293_v1_Cardiometabolic_II	68	Weighted median	0.163873790171403	0.0756512407989261	1.17806562224941	1.01571963188532	1.36635993512291	0.0302978534750909
ECHDC3_Q96DC8_OID30293_v1_Cardiometabolic_II	68	Inverse variance weighted	0.144292485329074	0.0509650435394267	1.15522194458708	1.04540147683251	1.27657916200682	0.00463729909487418
ECHDC3_Q96DC8_OID30293_v1_Cardiometabolic_II	68	Simple mode	-0.0715692	0.143567015753283	0.930931871476321	0.702604922503106	1.23345869289234	0.619759279845106
ECHDC3_Q96DC8_OID30293_v1_Cardiometabolic_II	68	Weighted mode	0.0980685199075877	0.06490370631594	1.10303836260587	0.97127781003294	1.25267314542991	0.135494618220738
ECHS1_P30084_OID30239_v1_Cardiometabolic_II	17	MR Egger	-0.0712966	0.280392122920903	0.931185703756213	0.537479254747769	1.61328424719736	0.802736274473059
ECHS1_P30084_OID30239_v1_Cardiometabolic_II	17	Weighted median	0.290365279213837	0.196816069696211	1.33691574637753	0.909014514495133	1.96624331560304	0.140128449868185
ECHS1_P30084_OID30239_v1_Cardiometabolic_II	17	Inverse variance weighted	0.404560007045679	0.191951876149058	1.4986429626269	1.02873956521985	2.18318688749095	0.0350645965585885
ECHS1_P30084_OID30239_v1_Cardiometabolic_II	17	Simple mode	0.0696993278932889	0.304276284324897	1.0721857564344	0.590561092724182	1.94659335073688	0.821720001826137
ECHS1_P30084_OID30239_v1_Cardiometabolic_II	17	Weighted mode	0.195538492736972	0.202083014134749	1.2159655988653	0.818285308767826	1.80691541419739	0.347636657441235
ECM1_Q16610_OID30736_v1_Inflammation_II	78	MR Egger	-0.201882	0.0767933221057168	0.817191471367176	0.703001141210974	0.949930038128969	0.0103615553650497
ECM1_Q16610_OID30736_v1_Inflammation_II	78	Weighted median	-0.169299	0.0536543137342354	0.844256714537001	0.759981550685331	0.937877241096253	0.00160300268611319
ECM1_Q16610_OID30736_v1_Inflammation_II	78	Inverse variance weighted	-0.162993	0.0417232827873277	0.849597075913772	0.782884029459829	0.921995039162143	9.36327470198388e-05
ECM1_Q16610_OID30736_v1_Inflammation_II	78	Simple mode	-0.198884	0.0864172439694245	0.81964498678554	0.691936027397499	0.970924879991436	0.0240721643745136
ECM1_Q16610_OID30736_v1_Inflammation_II	78	Weighted mode	-0.175149	0.0515222365081112	0.839331539323036	0.758711959187265	0.928517633565466	0.00107222826455596
EDA2R_Q9HAV5_OID21451_v1_Oncology	13	MR Egger	-2.11955	0.886869865767413	0.120085363612282	0.0211140335469434	0.682981511885568	0.0358661515930057
EDA2R_Q9HAV5_OID21451_v1_Oncology	13	Weighted median	-0.695949	0.430937140459848	0.498600890332608	0.214255485721604	1.16031030432283	0.106317810613861
EDA2R_Q9HAV5_OID21451_v1_Oncology	13	Inverse variance weighted	-1.15278	0.410392077210663	0.315757364410624	0.141260487233988	0.705807512998263	0.00496994646561276
EDA2R_Q9HAV5_OID21451_v1_Oncology	13	Simple mode	-0.10403	0.689767936273109	0.901197849454753	0.233172766785072	3.48307212312869	0.882623695102966
EDA2R_Q9HAV5_OID21451_v1_Oncology	13	Weighted mode	-0.273889	0.791787940725287	0.760416810116043	0.161089861217318	3.58951035612968	0.735398065520154
EDAR_Q9UNE0_OID20525_v1_Inflammation	119	MR Egger	0.113154464493944	0.0772158544615198	1.11980488968601	0.962531380484744	1.30277621736673	0.145485743596001
EDAR_Q9UNE0_OID20525_v1_Inflammation	119	Weighted median	0.210180574178809	0.0849347715332633	1.23390085047384	1.0446777054125	1.45739810557064	0.0133381127102924
EDAR_Q9UNE0_OID20525_v1_Inflammation	119	Inverse variance weighted	0.156961885756382	0.0473517506497255	1.16995102125287	1.06625494171679	1.28373181551377	0.000917066169801606
EDAR_Q9UNE0_OID20525_v1_Inflammation	119	Simple mode	0.0513612775171621	0.164322439755878	1.05270314256897	0.762837149914145	1.45271360538655	0.755163640386948
EDAR_Q9UNE0_OID20525_v1_Inflammation	119	Weighted mode	0.16697219570912	0.0899714983984773	1.18172140792581	0.990671838614702	1.40961459841525	0.0659722036828158
EDF1_O60869_OID31010_v1_Neurology_II	5	MR Egger	1.93418294211704	3.22377184614713	6.91838902116063	0.0124702449501028	3838.26515354225	0.590815780783244
EDF1_O60869_OID31010_v1_Neurology_II	5	Weighted median	1.05157889793138	0.526249675966758	2.86216662132339	1.02033349836345	8.02874528902279	0.0456894638228052
EDF1_O60869_OID31010_v1_Neurology_II	5	Inverse variance weighted	1.29145068981122	0.430071710470863	3.63806042664607	1.56597735536481	8.45189978168289	0.00267444089442102
EDF1_O60869_OID31010_v1_Neurology_II	5	Simple mode	0.911948181998341	0.787376724633334	2.48916716340064	0.53189445707285	11.6488395112254	0.311219965496665
EDF1_O60869_OID31010_v1_Neurology_II	5	Weighted mode	0.838289587038263	0.712798275261416	2.31240841902918	0.571897767070424	9.34998002140923	0.304788004776651
EIF2AK2_P19525_OID31442_v1_Oncology_II	14	MR Egger	-0.934903	0.454210461933513	0.392624003131761	0.161192598415665	0.956331800283377	0.0619563750379791
EIF2AK2_P19525_OID31442_v1_Oncology_II	14	Weighted median	-0.607516	0.221508086169329	0.54470204884493	0.352864135264584	0.840834452595737	0.00609479693157968
EIF2AK2_P19525_OID31442_v1_Oncology_II	14	Inverse variance weighted	-0.54209	0.19456435391101	0.581531389545309	0.397151896021895	0.851509864144911	0.00533340788575333
EIF2AK2_P19525_OID31442_v1_Oncology_II	14	Simple mode	-0.944883	0.339826625570296	0.388725059207953	0.199699176941647	0.75667398319013	0.0156015508664718
EIF2AK2_P19525_OID31442_v1_Oncology_II	14	Weighted mode	-0.690462	0.228004386133912	0.501344456479679	0.320667514479189	0.783822035890128	0.00969678126074735
EIF4G1_Q04637_OID20625_v1_Inflammation	5	MR Egger	-2.08549	1.37663811889594	0.12424629541321	0.00836498997429897	1.84544655419032	0.227034159499246
EIF4G1_Q04637_OID20625_v1_Inflammation	5	Weighted median	-0.879192	0.360004054779288	0.415118092387366	0.204988748517843	0.840646288507519	0.0145991423663364
EIF4G1_Q04637_OID20625_v1_Inflammation	5	Inverse variance weighted	-0.76391	0.33273780924352	0.465841309034083	0.24266428173337	0.894273041143432	0.0216854664279847
EIF4G1_Q04637_OID20625_v1_Inflammation	5	Simple mode	-1.18527	0.595689598050233	0.305664742829962	0.0951007900878612	0.982441207091846	0.117485813026261
EIF4G1_Q04637_OID20625_v1_Inflammation	5	Weighted mode	-1.0081	0.463737905678373	0.364909977099453	0.147042901325098	0.90558122960537	0.0953964581055323
ENO3_P13929_OID30209_v1_Cardiometabolic_II	26	MR Egger	0.897296373154296	0.322535140946495	2.45296224341517	1.30359716978044	4.61570790970175	0.0103523403791484
ENO3_P13929_OID30209_v1_Cardiometabolic_II	26	Weighted median	0.440434449549662	0.206995013514359	1.55338193801836	1.03533414814423	2.33064412072837	0.033357492498845
ENO3_P13929_OID30209_v1_Cardiometabolic_II	26	Inverse variance weighted	0.335616869450159	0.139938615394407	1.39880299797163	1.06325736635497	1.84024102634919	0.0164706976981247
ENO3_P13929_OID30209_v1_Cardiometabolic_II	26	Simple mode	0.560719867984081	0.447966157537257	1.75193320709646	0.728116802406512	4.21535384430493	0.222264180350701
ENO3_P13929_OID30209_v1_Cardiometabolic_II	26	Weighted mode	0.50583356571926	0.410912201918722	1.65836730261112	0.741148439866687	3.71070350072433	0.229778249808792
ENPP7_Q6UWV6_OID20689_v1_Inflammation	68	MR Egger	0.0279053812704861	0.0386762056226155	1.02829838353164	0.953229122618624	1.10927954306411	0.473142361285517
ENPP7_Q6UWV6_OID20689_v1_Inflammation	68	Weighted median	0.0711462136078101	0.0444061497039603	1.07373820952896	0.984235737677469	1.17137967914377	0.109117958683124
ENPP7_Q6UWV6_OID20689_v1_Inflammation	68	Inverse variance weighted	0.0739476030455234	0.0285971103074045	1.07675038557718	1.01805838266561	1.13882603648421	0.0097141506421185
ENPP7_Q6UWV6_OID20689_v1_Inflammation	68	Simple mode	0.174853336760089	0.0715387651097984	1.19107151739399	1.03524421680047	1.3703542956576	0.0171567684329095
ENPP7_Q6UWV6_OID20689_v1_Inflammation	68	Weighted mode	0.0717248356549369	0.0341479318148233	1.07435967791015	1.00480640317481	1.14872747015965	0.0394594858070266
ENSA_O43768_OID31355_v1_Oncology_II	3	MR Egger	-0.679079	1.15187933938657	0.507083719899888	0.0530371500724905	4.84818469009102	0.660877129577607
ENSA_O43768_OID31355_v1_Oncology_II	3	Weighted median	-0.808621	0.501300043661799	0.445472086985902	0.166765144772649	1.18996916624344	0.106734228651362
ENSA_O43768_OID31355_v1_Oncology_II	3	Inverse variance weighted	-0.885688	0.4121625861439	0.412430357060667	0.183869945785064	0.92510387545351	0.0316439173171005
ENSA_O43768_OID31355_v1_Oncology_II	3	Simple mode	-0.525126	0.597832443350855	0.591480896543072	0.183254848223618	1.90908810526251	0.472379014256496
ENSA_O43768_OID31355_v1_Oncology_II	3	Weighted mode	-0.597928	0.576581147895151	0.549950192619186	0.177634606034983	1.70262552501914	0.408661384792936
ENTPD2_Q9Y5L3_OID21260_v1_Oncology	53	MR Egger	-0.130711	0.0665458710603531	0.877471136497284	0.770172221897287	0.999718729778493	0.0549646887850807
ENTPD2_Q9Y5L3_OID21260_v1_Oncology	53	Weighted median	-0.114545	0.07487479732543	0.891771872019848	0.770050231362869	1.03273402089407	0.126061403672829
ENTPD2_Q9Y5L3_OID21260_v1_Oncology	53	Inverse variance weighted	-0.0980023	0.0489473314752475	0.906646796010872	0.823708071128739	0.99793657671749	0.0452632747138822
ENTPD2_Q9Y5L3_OID21260_v1_Oncology	53	Simple mode	0.057331860714505	0.145780094345731	1.0590071949713	0.795808162392303	1.40925450629912	0.695723218360782
ENTPD2_Q9Y5L3_OID21260_v1_Oncology	53	Weighted mode	-0.0914476	0.063639043373619	0.91260909265599	0.80559014393875	1.03384501692924	0.156715435074203
ENTPD6_O75354_OID20100_v1_Cardiometabolic	105	MR Egger	-0.216122	0.0606921453697505	0.805636721562757	0.715281605009326	0.907405590448429	0.000560972181274619
ENTPD6_O75354_OID20100_v1_Cardiometabolic	105	Weighted median	-0.168556	0.058509751658489	0.844884211522092	0.753342880639262	0.94754905000705	0.00396650131448709
ENTPD6_O75354_OID20100_v1_Cardiometabolic	105	Inverse variance weighted	-0.148172	0.0388169481427479	0.862283119974249	0.799113064946589	0.93044678107249	0.000134980920320386
ENTPD6_O75354_OID20100_v1_Cardiometabolic	105	Simple mode	-0.0892059	0.120366156871526	0.914657195459056	0.72243805395269	1.15802009684807	0.460290003999956
ENTPD6_O75354_OID20100_v1_Cardiometabolic	105	Weighted mode	-0.182441	0.0623825353523791	0.833233396245412	0.737336243760662	0.941602828415995	0.00423465082490969
EPO_P01588_OID20522_v1_Inflammation	36	MR Egger	-0.142736	0.218778880011607	0.866982824872691	0.564653665582192	1.33118629071366	0.518516094313477
EPO_P01588_OID20522_v1_Inflammation	36	Weighted median	-0.259917	0.155888430562437	0.771115613249342	0.568099733669057	1.0466811613457	0.0954494324726207
EPO_P01588_OID20522_v1_Inflammation	36	Inverse variance weighted	-0.214587	0.102770352802295	0.806874399547462	0.659668955056426	0.986928809753355	0.0367954078881932
EPO_P01588_OID20522_v1_Inflammation	36	Simple mode	-0.386726	0.245971961901261	0.67927731352562	0.419441646392221	1.10007595249402	0.12489344644031
EPO_P01588_OID20522_v1_Inflammation	36	Weighted mode	-0.283947	0.154380616976204	0.75280662822008	0.556252531073579	1.01881391604333	0.0743719145636781
ERBB4_Q15303_OID21510_v1_Oncology	81	MR Egger	-0.258011	0.157429381376089	0.772586561967189	0.567466927045624	1.05184983879121	0.105210573481386
ERBB4_Q15303_OID21510_v1_Oncology	81	Weighted median	-0.169159	0.105128229360632	0.84437422195883	0.687144398874912	1.03758078778776	0.107599348130059
ERBB4_Q15303_OID21510_v1_Oncology	81	Inverse variance weighted	-0.149598	0.067135783422173	0.861054155968835	0.754889413141601	0.982149499786573	0.0258612991194926
ERBB4_Q15303_OID21510_v1_Oncology	81	Simple mode	-0.204727	0.211373650536244	0.814869514828318	0.538472076413484	1.2331416154747	0.335685735341865
ERBB4_Q15303_OID21510_v1_Oncology	81	Weighted mode	-0.240357	0.129466963236099	0.786346694840859	0.610111992647295	1.01348790376033	0.0670614080794985
F10_P00742_OID30684_v1_Inflammation_II	39	MR Egger	0.160553599191037	0.243371273236572	1.17416	0.728728462086371	1.89186155627215	0.513527963585852
F10_P00742_OID30684_v1_Inflammation_II	39	Weighted median	0.244990371715103	0.14226050946102	1.27760901196211	0.966725949170005	1.68846692162161	0.0850468876238416
F10_P00742_OID30684_v1_Inflammation_II	39	Inverse variance weighted	0.213710952428362	0.100264273239889	1.23826468566045	1.0173416267947	1.50716277735011	0.0330498980438316
F10_P00742_OID30684_v1_Inflammation_II	39	Simple mode	0.345791101470785	0.278744002682168	1.41310738892735	0.818282912161671	2.44032041114717	0.222383320112441
F10_P00742_OID30684_v1_Inflammation_II	39	Weighted mode	0.145234411327889	0.213094584213862	1.15631059080268	0.76152599265886	1.7557564617514	0.499657084076915
F13B_P05160_OID30781_v1_Inflammation_II	80	MR Egger	-0.192661	0.0759998760733707	0.824761804084741	0.7106178942945	0.957240225638351	0.0132451738797881
F13B_P05160_OID30781_v1_Inflammation_II	80	Weighted median	-0.159278	0.074824553198809	0.852759333363804	0.736435195332235	0.987457532242211	0.0332803210599312
F13B_P05160_OID30781_v1_Inflammation_II	80	Inverse variance weighted	-0.103995	0.0466670708506596	0.901230200629059	0.822454581210214	0.987551036959082	0.0258514850807136
F13B_P05160_OID30781_v1_Inflammation_II	80	Simple mode	0.252415483163694	0.162661609046388	1.28713070734232	0.935755297885618	1.77044731836084	0.124711344034186
F13B_P05160_OID30781_v1_Inflammation_II	80	Weighted mode	-0.131466	0.0698442623745689	0.876808698265045	0.764631548883795	1.0054430718632	0.0634801972192825
F7_P08709_OID20372_v1_Cardiometabolic	70	MR Egger	0.00342970532311625	0.0751364013680336	1.00343559349206	0.866028343831066	1.1626443839385	0.963725882586109
F7_P08709_OID20372_v1_Cardiometabolic	70	Weighted median	-0.0215358	0.0689695430988337	0.97869439806643	0.854946703657259	1.12035372580441	0.75484940547105
F7_P08709_OID20372_v1_Cardiometabolic	70	Inverse variance weighted	-0.126841	0.0486577150743184	0.880873371086509	0.800746774914747	0.96901782210977	0.00913901749985511
F7_P08709_OID20372_v1_Cardiometabolic	70	Simple mode	-0.11841	0.114151480407664	0.888332167001667	0.710244184961266	1.11107426944004	0.303216761970443
F7_P08709_OID20372_v1_Cardiometabolic	70	Weighted mode	-0.0173502	0.0615385267951714	0.982799471858126	0.871128581188966	1.10878557166188	0.778833382990178
FABP6_P51161_OID20076_v1_Cardiometabolic	48	MR Egger	0.104113791010648	0.265270888475837	1.10972672465681	0.6598009037852	1.86646213479338	0.696515603380963
FABP6_P51161_OID20076_v1_Cardiometabolic	48	Weighted median	0.189134510091851	0.138925642485747	1.20820345711139	0.920204133621811	1.58633887899471	0.173384723411478
FABP6_P51161_OID20076_v1_Cardiometabolic	48	Inverse variance weighted	0.221975960171644	0.0943468395585112	1.24854136278345	1.03775129374915	1.50214752221544	0.018634396922999
FABP6_P51161_OID20076_v1_Cardiometabolic	48	Simple mode	0.495335194423739	0.257856833076224	1.64104821708856	0.989986276168486	2.72027937723778	0.0608129169017141
FABP6_P51161_OID20076_v1_Cardiometabolic	48	Weighted mode	0.135610008411274	0.196297758817141	1.14523517440703	0.779475829337848	1.68262254624784	0.493065
FABP9_Q0Z7S8_OID20501_v1_Inflammation	111	MR Egger	-0.273991	0.0773889603338585	0.760339044897802	0.653329818212771	0.88487536781587	0.000588800068981851
FABP9_Q0Z7S8_OID20501_v1_Inflammation	111	Weighted median	-0.213359	0.0714872205854755	0.807866022574787	0.702244250559205	0.929373946331486	0.00283971582626205
FABP9_Q0Z7S8_OID20501_v1_Inflammation	111	Inverse variance weighted	-0.210374	0.0456734158546506	0.810280993715945	0.740896691765156	0.886163072496766	4.10383337428211e-06
FABP9_Q0Z7S8_OID20501_v1_Inflammation	111	Simple mode	-0.182637	0.133967818693204	0.833070655418705	0.640687317928243	1.0832221857675	0.175575386788435
FABP9_Q0Z7S8_OID20501_v1_Inflammation	111	Weighted mode	-0.242584	0.0788556630189967	0.784598056313357	0.672239352861035	0.915736496756319	0.00264484836456429
FAM172A_Q8WUF8_OID30248_v1_Cardiometabolic_II	16	MR Egger	0.635385540420452	0.772843199264023	1.8877498050314	0.415037197541936	8.58621672346859	0.42477831866411
FAM172A_Q8WUF8_OID30248_v1_Cardiometabolic_II	16	Weighted median	0.379806394940179	0.309937521931925	1.46200151114239	0.796386109906207	2.68393483009688	0.220413665615417
FAM172A_Q8WUF8_OID30248_v1_Cardiometabolic_II	16	Inverse variance weighted	0.624700006038656	0.311328779672594	1.86768557898597	1.01460116854585	3.43804987624013	0.0447964895759128
FAM172A_Q8WUF8_OID30248_v1_Cardiometabolic_II	16	Simple mode	0.490889573161397	0.534343987990324	1.63376893070601	0.57325499529044	4.65621920588396	0.372801446536468
FAM172A_Q8WUF8_OID30248_v1_Cardiometabolic_II	16	Weighted mode	0.295802183980318	0.372305371174144	1.34420422540066	0.647966459810582	2.78854711108534	0.439286077841232
FAS_P25445_OID20316_v1_Cardiometabolic	38	MR Egger	0.314255481341827	0.138081984614558	1.36923950701209	1.04457989632037	1.79480462353041	0.0289055032796665
FAS_P25445_OID20316_v1_Cardiometabolic	38	Weighted median	0.312213552992897	0.118125927443463	1.36644647060682	1.08403125454047	1.72243738288278	0.00821612156358524
FAS_P25445_OID20316_v1_Cardiometabolic	38	Inverse variance weighted	0.166861617400189	0.0810422133727564	1.18159074239541	1.00805111651277	1.38500583913282	0.0394993215177639
FAS_P25445_OID20316_v1_Cardiometabolic	38	Simple mode	0.183791446937196	0.23267427158898	1.2017651651535	0.761663725835251	1.8961642299463	0.434614460841373
FAS_P25445_OID20316_v1_Cardiometabolic	38	Weighted mode	0.300745306806336	0.114281347338618	1.35086524153733	1.07977627405346	1.6900138895841	0.0123193261306319
FASLG_P48023_OID20665_v1_Inflammation	136	MR Egger	0.22247883422514	0.130270990989221	1.24916937973299	0.967681467736861	1.61253903406035	0.0899862666391937
FASLG_P48023_OID20665_v1_Inflammation	136	Weighted median	0.226663833033121	0.10027879414864	1.25440810648473	1.03057551281216	1.52685531341691	0.0238003653541748
FASLG_P48023_OID20665_v1_Inflammation	136	Inverse variance weighted	0.159159051724403	0.0621752710126117	1.17252442388209	1.03799972575627	1.32448351428836	0.0104718881095508
FASLG_P48023_OID20665_v1_Inflammation	136	Simple mode	0.497921458546985	0.236291321416011	1.64529789424196	1.0354027366548	2.61444659644505	0.0369466610290482
FASLG_P48023_OID20665_v1_Inflammation	136	Weighted mode	0.309710012473228	0.122469821881688	1.36302979517694	1.0721534130363	1.7328212548228	0.0125936952002731
FCGR2B_P31994_OID21215_v1_Oncology	59	MR Egger	0.14884368665382	0.091924049250129	1.16049157470944	0.969158170388989	1.38959845370861	0.110924062244371
FCGR2B_P31994_OID21215_v1_Oncology	59	Weighted median	0.167664714922644	0.0825369575833938	1.18254005613792	1.00590967167545	1.39018544482378	0.0422154914402261
FCGR2B_P31994_OID21215_v1_Oncology	59	Inverse variance weighted	0.145177767529298	0.0531965543870887	1.15624509483346	1.04176096927915	1.28331043180807	0.00635108783940152
FCGR2B_P31994_OID21215_v1_Oncology	59	Simple mode	0.106056440963767	0.141296161122924	1.11188463057571	0.842919317079946	1.46667350796189	0.455929797281456
FCGR2B_P31994_OID21215_v1_Oncology	59	Weighted mode	0.177904024264975	0.0741742877018986	1.19471065249917	1.03305705440495	1.3816599355368	0.0197011284693919
FCN1_O00602_OID30690_v1_Inflammation_II	96	MR Egger	0.185479963706906	0.082583217200949	1.20379607992242	1.0238979444147	1.41530218899399	0.0270477369748703
FCN1_O00602_OID30690_v1_Inflammation_II	96	Weighted median	0.11541588426822	0.0795159980549608	1.12234010411847	0.960371133417828	1.3116255429604	0.146646235480991
FCN1_O00602_OID30690_v1_Inflammation_II	96	Inverse variance weighted	0.101372206622521	0.0502601593462966	1.10668848189589	1.00286639457925	1.22125878639583	0.0437007766444386
FCN1_O00602_OID30690_v1_Inflammation_II	96	Simple mode	0.181009547429701	0.142087342815232	1.1984266211325	0.907118992036391	1.58328331657445	0.205795512468927
FCN1_O00602_OID30690_v1_Inflammation_II	96	Weighted mode	0.12296847634339	0.0746867722583492	1.13084877189723	0.976854466814617	1.30911920694956	0.10297429304483
FGFBP2_Q9BYJ0_OID30395_v1_Cardiometabolic_II	132	MR Egger	0.0427234126398546	0.04068492287614	1.04364919475136	0.963657790794537	1.13028053330749	0.295618368733914
FGFBP2_Q9BYJ0_OID30395_v1_Cardiometabolic_II	132	Weighted median	0.00575898565253641	0.0490455448385268	1.00577560048997	0.913592835439319	1.10725973245457	0.906526302510471
FGFBP2_Q9BYJ0_OID30395_v1_Cardiometabolic_II	132	Inverse variance weighted	0.0695324119930498	0.0307367313384586	1.07200680651885	1.00933168979943	1.13857377593197	0.0236854946447912
FGFBP2_Q9BYJ0_OID30395_v1_Cardiometabolic_II	132	Simple mode	0.186372192115953	0.100736046901897	1.20487062028005	0.988990592229382	1.46787363097317	0.066551630985978
FGFBP2_Q9BYJ0_OID30395_v1_Cardiometabolic_II	132	Weighted mode	0.0513821373242083	0.0425296474925733	1.05272510198243	0.968529853866186	1.14424	0.22916654087011
FLT3LG_P49771_OID20661_v1_Inflammation	86	MR Egger	-0.104936	0.130955417522095	0.900382421502478	0.696555147077328	1.1638540155108	0.425213916992375
FLT3LG_P49771_OID20661_v1_Inflammation	86	Weighted median	0.0240396033685826	0.108177349860631	1.02433088404089	0.82862464871472	1.26625941145667	0.824139512068783
FLT3LG_P49771_OID20661_v1_Inflammation	86	Inverse variance weighted	-0.161176	0.0798605025261608	0.851142451101374	0.727819386691561	0.995361603872559	0.0435687342016879
FLT3LG_P49771_OID20661_v1_Inflammation	86	Simple mode	-0.0130918	0.229291703669923	0.986993484209856	0.629705152927249	1.54700359897683	0.95460202829985
FLT3LG_P49771_OID20661_v1_Inflammation	86	Weighted mode	-0.00151022	0.109782555197509	0.998490921183801	0.805184345781406	1.23820603928773	0.989056521675249
FSHB_P01225_OID30233_v1_Cardiometabolic_II	10	MR Egger	0.228153553792851	0.437271302269754	1.25627821690744	0.533178934762104	2.96004747258125	0.615966564162498
FSHB_P01225_OID30233_v1_Cardiometabolic_II	10	Weighted median	0.346393984168175	0.272656353102724	1.41395958378264	0.828604376200868	2.41283025047182	0.203927358997889
FSHB_P01225_OID30233_v1_Cardiometabolic_II	10	Inverse variance weighted	0.478567542908109	0.210494187601317	1.6137611022015	1.06822557972897	2.43789789759514	0.0229934904748091
FSHB_P01225_OID30233_v1_Cardiometabolic_II	10	Simple mode	0.942140064852369	0.47308858143485	2.56546581097017	1.01499780023989	6.48436363675002	0.0776129943878506
FSHB_P01225_OID30233_v1_Cardiometabolic_II	10	Weighted mode	0.199981437750124	0.334086661407887	1.22138008638739	0.634556836752538	2.35088368609829	0.564204917433413
FST_P19883_OID20770_v1_Inflammation	20	MR Egger	-0.424215	0.333164496777312	0.654282918253584	0.340541650927007	1.25707424026726	0.219113587283237
FST_P19883_OID20770_v1_Inflammation	20	Weighted median	-0.236507	0.200622866821452	0.78937998306489	0.532736530016648	1.16966027774377	0.238451544799131
FST_P19883_OID20770_v1_Inflammation	20	Inverse variance weighted	-0.317046	0.135902731189176	0.728297224389809	0.557989356041516	0.950585958873443	0.0196539517005082
FST_P19883_OID20770_v1_Inflammation	20	Simple mode	-0.251391	0.343286682830215	0.777718299998556	0.39683575431798	1.52417151824477	0.472919413696806
FST_P19883_OID20770_v1_Inflammation	20	Weighted mode	-0.211594	0.206479084679694	0.809293146845456	0.539942257071106	1.21301007460279	0.318341606907304
GALNT2_Q10471_OID21423_v1_Oncology	101	MR Egger	0.199968203050346	0.0826782892830278	1.2213639218956	1.03865	1.43622429116013	0.0174059710256105
GALNT2_Q10471_OID21423_v1_Oncology	101	Weighted median	0.101409912017727	0.0748227487497638	1.10673021080916	0.955765512783532	1.28154002538812	0.175310755688162
GALNT2_Q10471_OID21423_v1_Oncology	101	Inverse variance weighted	0.136275604498318	0.047562585872105	1.14599769219414	1.04399315840702	1.25796869446751	0.00416765769597354
GALNT2_Q10471_OID21423_v1_Oncology	101	Simple mode	0.075079982527682	0.132967157480849	1.07797036623138	0.830659225262477	1.39891314649017	0.573575886397497
GALNT2_Q10471_OID21423_v1_Oncology	101	Weighted mode	0.0856169356880154	0.0756495599198839	1.08938894234172	0.939266336304202	1.26350559135981	0.260443195557096
GASK1A_Q9UFP1_OID30109_v1_Cardiometabolic_II	97	MR Egger	-0.0285732	0.0519488692573019	0.971831201359898	0.877750464711144	1.07599588027268	0.583593446293113
GASK1A_Q9UFP1_OID30109_v1_Cardiometabolic_II	97	Weighted median	-0.0984102	0.0504052507826534	0.906277078707834	0.821022729444732	1.00038417200299	0.0508931297973058
GASK1A_Q9UFP1_OID30109_v1_Cardiometabolic_II	97	Inverse variance weighted	-0.0829734	0.0315005157019976	0.920375603011242	0.865269345109963	0.978991403550364	0.0084377048196377
GASK1A_Q9UFP1_OID30109_v1_Cardiometabolic_II	97	Simple mode	-0.11383	0.0879263883482046	0.892409835628587	0.751138280178743	1.06025126896359	0.198562361343049
GASK1A_Q9UFP1_OID30109_v1_Cardiometabolic_II	97	Weighted mode	-0.0796932	0.0428057003951457	0.923399563855537	0.849088027747617	1.00421478888411	0.0656985121527445
GGH_Q92820_OID20416_v1_Cardiometabolic	116	MR Egger	0.147525330362644	0.0653598808874446	1.15896264140194	1.01960975792807	1.31736126858461	0.0259054456590568
GGH_Q92820_OID20416_v1_Cardiometabolic	116	Weighted median	0.0918258133473312	0.0647806949525837	1.09617386659379	0.965466042372804	1.24457732645887	0.156340500493713
GGH_Q92820_OID20416_v1_Cardiometabolic	116	Inverse variance weighted	0.168731662493545	0.0409451297063962	1.18380243770603	1.09251153716835	1.28272165907828	3.7736011103494e-05
GGH_Q92820_OID20416_v1_Cardiometabolic	116	Simple mode	0.167722583333517	0.11321476063748	1.18260848983182	0.947263149406065	1.47642483622339	0.141220198305019
GGH_Q92820_OID20416_v1_Cardiometabolic	116	Weighted mode	0.128569492801348	0.0565705118630004	1.13720044579004	1.01784870735061	1.27054722825285	0.0249000989963776
GGT1_P19440_OID21075_v1_Neurology	50	MR Egger	-0.192259	0.136834264434268	0.825093214905419	0.630997063890515	1.07889378927615	0.166445658119685
GGT1_P19440_OID21075_v1_Neurology	50	Weighted median	-0.186613	0.119913718767516	0.829765172595183	0.655967895127129	1.04960966347062	0.119654963666286
GGT1_P19440_OID21075_v1_Neurology	50	Inverse variance weighted	-0.252224	0.0808974124628173	0.777070590698201	0.663130808181525	0.910587617824501	0.00182190128142066
GGT1_P19440_OID21075_v1_Neurology	50	Simple mode	-0.0951477	0.239142495922019	0.909238623913985	0.569004	1.45291456715875	0.692453925886722
GGT1_P19440_OID21075_v1_Neurology	50	Weighted mode	-0.105589	0.120609483544981	0.899794119943609	0.710359651925805	1.1397458401391	0.38559271220424
GIMAP7_Q8NHV1_OID30639_v1_Inflammation_II	56	MR Egger	0.0676476446151725	0.0716996609491673	1.06998822593603	0.929708957400619	1.2314335518964	0.349634508952786
GIMAP7_Q8NHV1_OID30639_v1_Inflammation_II	56	Weighted median	0.13262506423922	0.0677908237648535	1.14182180823568	0.999755079657993	1.30407643660945	0.0504196207698026
GIMAP7_Q8NHV1_OID30639_v1_Inflammation_II	56	Inverse variance weighted	0.150397006996381	0.0458436484831343	1.16229559062439	1.06241376478729	1.27156771190308	0.00103567843847694
GIMAP7_Q8NHV1_OID30639_v1_Inflammation_II	56	Simple mode	0.146561612122332	0.107003182430885	1.15784626598666	0.938788912427281	1.42801854379921	0.176348853451717
GIMAP7_Q8NHV1_OID30639_v1_Inflammation_II	56	Weighted mode	0.125603696613467	0.0626056835269007	1.13383273747981	1.00290075597499	1.28185831840475	0.0497552440496158
GIMAP8_Q8ND71_OID31194_v1_Oncology_II	10	MR Egger	-6.58366e-05	0.334051936174132	0.999934165566053	0.519541996487963	1.9245187919846	0.999847574905232
GIMAP8_Q8ND71_OID31194_v1_Oncology_II	10	Weighted median	0.294494526190156	0.226073817604493	1.34244761504667	0.861905057656221	2.09090964617973	0.192695083595791
GIMAP8_Q8ND71_OID31194_v1_Oncology_II	10	Inverse variance weighted	0.438581748881785	0.173228092048629	1.55050665061022	1.10412668090276	2.17735058410229	0.0113473344277322
GIMAP8_Q8ND71_OID31194_v1_Oncology_II	10	Simple mode	0.476010496866443	0.324930648680909	1.60963991204494	0.851416731059801	3.04309341351909	0.176971760308145
GIMAP8_Q8ND71_OID31194_v1_Oncology_II	10	Weighted mode	0.295372969619672	0.221366628856018	1.34362739744376	0.870658355597292	2.07352811990529	0.214874888858558
GLB1_P16278_OID20949_v1_Neurology	63	MR Egger	0.190766572014068	0.111312843961056	1.21017692994492	0.972965551200914	1.50522102243318	0.0916456318709845
GLB1_P16278_OID20949_v1_Neurology	63	Weighted median	0.15958726807458	0.0900701621199194	1.17302662552918	0.983192597564079	1.39951365338742	0.0764260022411278
GLB1_P16278_OID20949_v1_Neurology	63	Inverse variance weighted	0.138123662885162	0.0590406845395229	1.1481175210209	1.02265677379593	1.28896994167684	0.0193113390430378
GLB1_P16278_OID20949_v1_Neurology	63	Simple mode	0.133114014638761	0.158825675696274	1.14238023897636	0.836788181074696	1.55957342601041	0.405186212404632
GLB1_P16278_OID20949_v1_Neurology	63	Weighted mode	0.144484891668806	0.0858760659131037	1.15544423799766	0.976449546666074	1.3672507623976	0.0975056834837096
GNE_Q9Y223_OID21231_v1_Oncology	6	MR Egger	-0.608661	0.703903	0.544078656402067	0.136926367231098	2.16190344006327	0.435980817906124
GNE_Q9Y223_OID21231_v1_Oncology	6	Weighted median	-0.656629	0.283254324522085	0.518596401177998	0.297658678982312	0.903525569065476	0.020440531054515
GNE_Q9Y223_OID21231_v1_Oncology	6	Inverse variance weighted	-0.658768	0.256070332998211	0.517488662420362	0.313277620495321	0.85481534017721	0.0100936511559194
GNE_Q9Y223_OID21231_v1_Oncology	6	Simple mode	-0.894536	0.468140713985142	0.408797116877823	0.163312115158746	1.02328650024022	0.114264870957432
GNE_Q9Y223_OID21231_v1_Oncology	6	Weighted mode	-0.676147	0.311773098807282	0.508572780234518	0.276036487727218	0.93700030356517	0.0822764179758474
GYS1_P13807_OID20097_v1_Cardiometabolic	182	MR Egger	-0.399873	0.0975161213836676	0.670404942471938	0.553770490398126	0.811604797806547	6.23172371574285e-05
GYS1_P13807_OID20097_v1_Cardiometabolic	182	Weighted median	-0.582109	0.0590502282504531	0.55871856301427	0.497655183161366	0.627274553182962	6.3380411291704e-23
GYS1_P13807_OID20097_v1_Cardiometabolic	182	Inverse variance weighted	-0.611217	0.0376385159902303	0.542689808621833	0.504095840907946	0.584238560372854	2.66607473344682e-59
GYS1_P13807_OID20097_v1_Cardiometabolic	182	Simple mode	-0.821858	0.172130233217555	0.439614262181723	0.313726757631638	0.616015991025215	3.70259563541037e-06
GYS1_P13807_OID20097_v1_Cardiometabolic	182	Weighted mode	-0.458964	0.10041743711518	0.631937879879852	0.519035831997775	0.769398680029385	8.9850820171689e-06
GZMA_P12544_OID20663_v1_Inflammation	105	MR Egger	0.448271201365317	0.160712960262982	1.56560323181754	1.14256278834249	2.14527683247356	0.00629420520166996
GZMA_P12544_OID20663_v1_Inflammation	105	Weighted median	0.0946976729599544	0.0830150313500062	1.09932644876962	0.934249460125563	1.29357167710003	0.253982617968836
GZMA_P12544_OID20663_v1_Inflammation	105	Inverse variance weighted	0.133182205958883	0.0581325844957901	1.14245814204906	1.01942866738202	1.28033539579192	0.0219629611017962
GZMA_P12544_OID20663_v1_Inflammation	105	Simple mode	-0.0374777	0.192006037048813	0.963215897307383	0.661126862455302	1.40333862910977	0.845624865025307
GZMA_P12544_OID20663_v1_Inflammation	105	Weighted mode	-0.00885495	0.156651260248592	0.99118414300327	0.729138618176173	1.34740635161879	0.955030847635736
HCG22_E2RYF7_OID30088_v1_Cardiometabolic_II	100	MR Egger	-0.00865469	0.0839158268101983	0.991382650632303	0.841028514626963	1.16861621559962	0.918066256666745
HCG22_E2RYF7_OID30088_v1_Cardiometabolic_II	100	Weighted median	-0.101131	0.0708691550712926	0.903814810068978	0.786600849017535	1.03849520620313	0.153577814623225
HCG22_E2RYF7_OID30088_v1_Cardiometabolic_II	100	Inverse variance weighted	-0.105074	0.0441295503097518	0.900257957433382	0.82566359700792	0.981591525724429	0.0172641421506264
HCG22_E2RYF7_OID30088_v1_Cardiometabolic_II	100	Simple mode	-0.00791507	0.132181527781186	0.992116168228463	0.76568006367307	1.2855166772118	0.952371657591598
HCG22_E2RYF7_OID30088_v1_Cardiometabolic_II	100	Weighted mode	-0.0475411	0.0718088101669165	0.953571244574824	0.828377421279324	1.09768578322147	0.509476334281736
HDGFL2_Q7Z4V5_OID31136_v1_Neurology_II	8	MR Egger	-0.855765	0.649953187954516	0.42495788276073	0.118876104992342	1.51913794729492	0.236008316563392
HDGFL2_Q7Z4V5_OID31136_v1_Neurology_II	8	Weighted median	-0.679001	0.291707869989802	0.507123298467202	0.286290417408394	0.898297757138675	0.019929368260241
HDGFL2_Q7Z4V5_OID31136_v1_Neurology_II	8	Inverse variance weighted	-0.621403	0.241678374604158	0.537190420232865	0.334508743249137	0.862678639688163	0.0101347735807863
HDGFL2_Q7Z4V5_OID31136_v1_Neurology_II	8	Simple mode	-0.375496	0.528591049841268	0.686948712517643	0.243769029720387	1.93584285161628	0.500449236910475
HDGFL2_Q7Z4V5_OID31136_v1_Neurology_II	8	Weighted mode	-0.705661	0.335321035924786	0.493781846672923	0.255919920069084	0.952721898466925	0.0733889732413642
HLA-A_P04439_OID31048_v1_Neurology_II	285	MR Egger	-0.0376489	0.0246962668521549	0.963051044278559	0.917545098908614	1.01081387169874	0.128506580131334
HLA-A_P04439_OID31048_v1_Neurology_II	285	Weighted median	-0.0429199	0.0234168156824597	0.957988074807097	0.915013089965549	1.00298144533338	0.0668220957899182
HLA-A_P04439_OID31048_v1_Neurology_II	285	Inverse variance weighted	-0.0519599	0.0146297725047022	0.949366930846613	0.922531036976134	0.976983465336174	0.000382816399659075
HLA-A_P04439_OID31048_v1_Neurology_II	285	Simple mode	-0.0518562	0.0383659911238775	0.949465430238286	0.880686554270934	1.02361572212699	0.177573159330203
HLA-A_P04439_OID31048_v1_Neurology_II	285	Weighted mode	-0.0365567	0.0226855399658015	0.964103453522021	0.922174942025534	1.0079383278963	0.108191859168233
HSPB1_P04792_OID20230_v1_Cardiometabolic	68	MR Egger	-0.149329	0.0877482939913676	0.861285762754459	0.725194351152883	1.02291635882743	0.0935018419747902
HSPB1_P04792_OID20230_v1_Cardiometabolic	68	Weighted median	-0.0776044	0.0771357071015785	0.925330430222072	0.795495276246446	1.07635636648294	0.314379014214552
HSPB1_P04792_OID20230_v1_Cardiometabolic	68	Inverse variance weighted	-0.114921	0.0515348576232496	0.891436416320201	0.805792118452194	0.986183490933397	0.0257494604746711
HSPB1_P04792_OID20230_v1_Cardiometabolic	68	Simple mode	-0.0343211	0.14382747071392	0.966261228347617	0.728896960046914	1.28092283626447	0.812123513462303
HSPB1_P04792_OID20230_v1_Cardiometabolic	68	Weighted mode	-0.083937	0.0802091504972488	0.919489192312256	0.785726175987729	1.07602419343638	0.299101795811918
HSPG2_P98160_OID20383_v1_Cardiometabolic	20	MR Egger	0.0587615005711025	0.242996927923749	1.06052227661815	0.658683272641855	1.70750882240012	0.811653229374884
HSPG2_P98160_OID20383_v1_Cardiometabolic	20	Weighted median	0.225898687054531	0.159774881663619	1.2534486682685	0.916438716332102	1.71439021069765	0.157404165208219
HSPG2_P98160_OID20383_v1_Cardiometabolic	20	Inverse variance weighted	0.241770241247678	0.120376285915629	1.27350156107038	1.00584976428974	1.61237421693277	0.0445950622240377
HSPG2_P98160_OID20383_v1_Cardiometabolic	20	Simple mode	0.268904370149443	0.258852909096498	1.30853000053458	0.787850181910166	2.17332026013832	0.311923727631929
HSPG2_P98160_OID20383_v1_Cardiometabolic	20	Weighted mode	0.196867121706566	0.157198173313308	1.2175822397061	0.894722828061646	1.6569449934115	0.225639002830056
ICAM3_P32942_OID20277_v1_Cardiometabolic	168	MR Egger	0.324438083998093	0.0832672909606332	1.38325315547628	1.17496010486728	1.62847171083415	0.000141389462061964
ICAM3_P32942_OID20277_v1_Cardiometabolic	168	Weighted median	0.164799186629744	0.0707406094855221	1.17915630458288	1.02649243940499	1.35452492123909	0.0198259091588902
ICAM3_P32942_OID20277_v1_Cardiometabolic	168	Inverse variance weighted	0.171889227465257	0.0444226012589194	1.18754627841633	1.08852212649671	1.29557877515935	0.000109099347248259
ICAM3_P32942_OID20277_v1_Cardiometabolic	168	Simple mode	0.126753765218588	0.150081905644181	1.13513747303853	0.84585547285061	1.52335372182888	0.399562623153592
ICAM3_P32942_OID20277_v1_Cardiometabolic	168	Weighted mode	0.193340182175762	0.0886668665237258	1.21329546481449	1.01974553816882	1.44358158956289	0.0306176767573548
IFIT3_O14879_OID31283_v1_Oncology_II	17	MR Egger	0.239980232706267	0.277635268962678	1.27122402141441	0.737724452675169	2.19053402223686	0.400995247864951
IFIT3_O14879_OID31283_v1_Oncology_II	17	Weighted median	0.218424293871538	0.179930639689832	1.24411482594497	0.874380398094763	1.77019258838456	0.224772137163935
IFIT3_O14879_OID31283_v1_Oncology_II	17	Inverse variance weighted	0.332106475813612	0.1404516545375	1.39390125738187	1.05846657450275	1.83563729090221	0.0180514643508774
IFIT3_O14879_OID31283_v1_Oncology_II	17	Simple mode	0.432892212455829	0.303161595550993	1.54171003460594	0.85103287951769	2.79292362023864	0.172541406885681
IFIT3_O14879_OID31283_v1_Oncology_II	17	Weighted mode	0.259658007228768	0.180391181125482	1.29648662178655	0.910365867770916	1.84637585829886	0.169310209031463
IGF2R_P11717_OID21146_v1_Neurology	99	MR Egger	0.130700416406111	0.0752618279165022	1.13962631681828	0.983327779488397	1.3207682820275	0.0856308113284876
IGF2R_P11717_OID21146_v1_Neurology	99	Weighted median	0.0712551581954121	0.0767505332087106	1.07385519386768	0.923877412225462	1.24817964173279	0.353200367398209
IGF2R_P11717_OID21146_v1_Neurology	99	Inverse variance weighted	0.098637661684854	0.0477834833508761	1.10366632650325	1.00499446528537	1.21202593878097	0.0389928168648195
IGF2R_P11717_OID21146_v1_Neurology	99	Simple mode	0.312424759227683	0.170452302035267	1.36673510310033	0.978571178076492	1.90886967028641	0.0698511009517499
IGF2R_P11717_OID21146_v1_Neurology	99	Weighted mode	0.0771955586761468	0.0789237454555061	1.08025330864472	0.92543166781552	1.26097609517993	0.330431714696268
IGFBPL1_Q8WX77_OID20155_v1_Cardiometabolic	74	MR Egger	0.0542914711805554	0.0695636427757711	1.05579229033707	0.921222885080708	1.21001918036104	0.43767996733601
IGFBPL1_Q8WX77_OID20155_v1_Cardiometabolic	74	Weighted median	0.109071306775029	0.062158692456538	1.11524187180746	0.987321329785503	1.2597362126298	0.0793066463052521
IGFBPL1_Q8WX77_OID20155_v1_Cardiometabolic	74	Inverse variance weighted	0.0986529157618077	0.0421240536289302	1.10368316204273	1.01621990803225	1.19867413789927	0.0191826887981188
IGFBPL1_Q8WX77_OID20155_v1_Cardiometabolic	74	Simple mode	0.0619830354518975	0.115496574022307	1.06394429524076	0.848410865239735	1.33423263392023	0.593130472999778
IGFBPL1_Q8WX77_OID20155_v1_Cardiometabolic	74	Weighted mode	0.0977334300911927	0.0550792441544307	1.10266880760398	0.989830177495152	1.22837081239498	0.0801640018094624
IL10_P22301_OID20431_v1_Inflammation	37	MR Egger	-0.250793	0.237912296821328	0.778183723966945	0.48816552728108	1.24050117102673	0.299042274385194
IL10_P22301_OID20431_v1_Inflammation	37	Weighted median	-0.240605	0.134801196826403	0.786151846017794	0.603616834285707	1.02388583268812	0.0742791505541501
IL10_P22301_OID20431_v1_Inflammation	37	Inverse variance weighted	-0.254153	0.118771073222426	0.775572852617753	0.614501037554453	0.978864498116226	0.0323661579258172
IL10_P22301_OID20431_v1_Inflammation	37	Simple mode	-0.227915	0.23814716913704	0.796192073414014	0.499232542127314	1.26979266028224	0.34493358390305
IL10_P22301_OID20431_v1_Inflammation	37	Weighted mode	-0.269539	0.124210521701727	0.763731778117485	0.598702030372269	0.974251295830435	0.0366833291677039
IL15_P40933_OID20562_v1_Inflammation	87	MR Egger	-0.0526056	0.180024832691558	0.948754140950945	0.666673900298955	1.35018697982315	0.770835872273281
IL15_P40933_OID20562_v1_Inflammation	87	Weighted median	-0.171327	0.10042295104543	0.842545948341508	0.692009175401949	1.02582985934306	0.0879978353844
IL15_P40933_OID20562_v1_Inflammation	87	Inverse variance weighted	-0.176418	0.0678780310690544	0.838267510923567	0.733843898821201	0.957550265115989	0.00934837312038062
IL15_P40933_OID20562_v1_Inflammation	87	Simple mode	-0.183551	0.21373590386186	0.832309101118199	0.547455684041195	1.26537811186934	0.392851098967326
IL15_P40933_OID20562_v1_Inflammation	87	Weighted mode	-0.239057	0.151963528863911	0.78736984768248	0.584554236383934	1.06055390321789	0.119362473116169
IL1RL1_Q01638_OID20250_v1_Cardiometabolic	141	MR Egger	0.078285820399619	0.0502636952602209	1.08143170974487	0.979972251699812	1.19339556891857	0.121625223487639
IL1RL1_Q01638_OID20250_v1_Cardiometabolic	141	Weighted median	0.0788746870131159	0.0545256063766993	1.08206871631106	0.972392741114531	1.20411502195814	0.148019549185538
IL1RL1_Q01638_OID20250_v1_Cardiometabolic	141	Inverse variance weighted	0.0671545938585429	0.0341765784757437	1.06946079746684	1.00016851424302	1.14355369223361	0.0494223077190851
IL1RL1_Q01638_OID20250_v1_Cardiometabolic	141	Simple mode	-0.00565005	0.0982042638936985	0.994365878390231	0.820262875375041	1.20542271238924	0.954202108988948
IL1RL1_Q01638_OID20250_v1_Cardiometabolic	141	Weighted mode	0.0344024545550754	0.0490898397114023	1.03500106381261	0.940058067885964	1.13953301257469	0.484587214672809
IL5RA_Q01344_OID20601_v1_Inflammation	168	MR Egger	0.0698131588807349	0.0677596839545162	1.07230781134446	0.938947396912904	1.22460964911436	0.304365557123896
IL5RA_Q01344_OID20601_v1_Inflammation	168	Weighted median	0.170249370622348	0.0659223383402551	1.18560046838639	1.0418954344453	1.34912624066385	0.0098066097719193
IL5RA_Q01344_OID20601_v1_Inflammation	168	Inverse variance weighted	0.0992861291543674	0.0434307604078032	1.10438225031475	1.01426259265185	1.20250925514406	0.0222496644572739
IL5RA_Q01344_OID20601_v1_Inflammation	168	Simple mode	-0.175995	0.140268236067437	0.838622171378216	0.637041326514838	1.10398983088695	0.211339648009952
IL5RA_Q01344_OID20601_v1_Inflammation	168	Weighted mode	0.169007743896948	0.0659866374734749	1.1841293086638	1.04047145697658	1.34762199408242	0.0113146147760274
INHBB_P09529_OID30625_v1_Inflammation_II	41	MR Egger	-0.187298	0.110336644824683	0.829196923402832	0.667939664183431	1.02938569851408	0.0975676362335741
INHBB_P09529_OID30625_v1_Inflammation_II	41	Weighted median	-0.106799	0.0919513657211674	0.898706017862175	0.750493728053203	1.07618821630503	0.245448361379945
INHBB_P09529_OID30625_v1_Inflammation_II	41	Inverse variance weighted	-0.137812	0.0693397408334284	0.871262868444967	0.76054694584195	0.998096159719115	0.0468689126575283
INHBB_P09529_OID30625_v1_Inflammation_II	41	Simple mode	-0.308975	0.213705556112715	0.734198938639368	0.482951935113991	1.11615264854864	0.156023803194193
INHBB_P09529_OID30625_v1_Inflammation_II	41	Weighted mode	-0.150183	0.0913589987619168	0.860550404398633	0.719465483351872	1.02930163523699	0.108039631339618
INHBC_P55103_OID21093_v1_Neurology	92	MR Egger	0.0396505826908003	0.0705286679535864	1.04044716042246	0.906118119694736	1.19469004106865	0.575383435971962
INHBC_P55103_OID21093_v1_Neurology	92	Weighted median	0.0448316969801761	0.0687799370323532	1.04585182507509	0.913952224571894	1.19678688951738	0.514521440124621
INHBC_P55103_OID21093_v1_Neurology	92	Inverse variance weighted	0.0985178127131424	0.0440604218304646	1.10353	1.0122336118004	1.20306953842723	0.0253536897976884
INHBC_P55103_OID21093_v1_Neurology	92	Simple mode	-0.0816968	0.147415375556009	0.921551305256722	0.690298639812442	1.23027449170567	0.580804957016981
INHBC_P55103_OID21093_v1_Neurology	92	Weighted mode	0.0603852967200416	0.0638940177950696	1.0622457475108	0.937210866138049	1.20396174316076	0.347117978883014
INPP5D_Q92835_OID30259_v1_Cardiometabolic_II	11	MR Egger	-0.700672	0.37574012760341	0.496251929433277	0.237610569260302	1.03642686532376	0.095086948362582
INPP5D_Q92835_OID30259_v1_Cardiometabolic_II	11	Weighted median	-0.73356	0.22753584412114	0.48019660648396	0.307423219198406	0.750069501841672	0.00126444249412124
INPP5D_Q92835_OID30259_v1_Cardiometabolic_II	11	Inverse variance weighted	-0.763928	0.206162026507618	0.465833115413019	0.310986616222424	0.697780805011221	0.000210996576080792
INPP5D_Q92835_OID30259_v1_Cardiometabolic_II	11	Simple mode	-1.05358	0.447010831906235	0.348686124576394	0.145188214318048	0.837409661956223	0.0401615485130695
INPP5D_Q92835_OID30259_v1_Cardiometabolic_II	11	Weighted mode	-0.754976	0.229199639146433	0.470021728440712	0.299929555365201	0.736574376397807	0.00809556237788277
IPCEF1_Q8WWN9_OID20977_v1_Neurology	7	MR Egger	-1.7082	1.5247383238032	0.181191835340606	0.0091254683037697	3.59767631657161	0.313484071053662
IPCEF1_Q8WWN9_OID20977_v1_Neurology	7	Weighted median	-0.34428	0.314919778537142	0.708730278285869	0.382310177713826	1.31385099492474	0.274292130139519
IPCEF1_Q8WWN9_OID20977_v1_Neurology	7	Inverse variance weighted	-0.572391	0.278585346030124	0.564174896981537	0.32679629517204	0.973980791968784	0.0399143515274194
IPCEF1_Q8WWN9_OID20977_v1_Neurology	7	Simple mode	-0.227657	0.463757539042673	0.796397175852085	0.320901187782026	1.97646031193875	0.640935551245147
IPCEF1_Q8WWN9_OID20977_v1_Neurology	7	Weighted mode	-0.311199	0.356590407137845	0.732567731720547	0.364176487222345	1.47361375703132	0.416375833273631
ITGB2_P05107_OID20315_v1_Cardiometabolic	53	MR Egger	0.416563948012901	0.215402142267641	1.51674099079359	0.994391535657443	2.31347829367086	0.0586852614127928
ITGB2_P05107_OID20315_v1_Cardiometabolic	53	Weighted median	0.307190728907698	0.132804468204918	1.35960025841631	1.04801088387943	1.76382983337256	0.0207168464053247
ITGB2_P05107_OID20315_v1_Cardiometabolic	53	Inverse variance weighted	0.214538010248436	0.090027785946311	1.23928922577061	1.03881802228425	1.47844738170211	0.0171712635878937
ITGB2_P05107_OID20315_v1_Cardiometabolic	53	Simple mode	0.340972182774983	0.246035781277073	1.40631412056173	0.868265315049107	2.27778234534158	0.171703328810609
ITGB2_P05107_OID20315_v1_Cardiometabolic	53	Weighted mode	0.351631220616663	0.170236567030156	1.42138424984668	1.01813	1.98435692023705	0.043871744988544
ITGB6_P18564_OID20493_v1_Inflammation	62	MR Egger	0.259727425502424	0.118477443074752	1.29657662477355	1.02789357671323	1.63549124344627	0.0322548143083314
ITGB6_P18564_OID20493_v1_Inflammation	62	Weighted median	0.230434182883982	0.103501277641166	1.25914659116109	1.02795529497328	1.54233374329162	0.0259880869499509
ITGB6_P18564_OID20493_v1_Inflammation	62	Inverse variance weighted	0.243504938642394	0.0723770151698677	1.27571261811352	1.10699151508005	1.47014919432005	0.000767113957477812
ITGB6_P18564_OID20493_v1_Inflammation	62	Simple mode	0.365635903147431	0.221247707132186	1.44143032685501	0.934251502074241	2.22394224955953	0.103549043111485
ITGB6_P18564_OID20493_v1_Inflammation	62	Weighted mode	0.278045045026221	0.101963686864654	1.32054567988416	1.08133481604396	1.6126743232411	0.00833609920229591
ITGBL1_O95965_OID30408_v1_Cardiometabolic_II	76	MR Egger	-0.0767055	0.0874985954999977	0.926162526326639	0.780201708159577	1.09942982205866	0.383514421413289
ITGBL1_O95965_OID30408_v1_Cardiometabolic_II	76	Weighted median	-0.0582055	0.0757991712133986	0.94345607893137	0.813205168049202	1.09456925244073	0.442552218447532
ITGBL1_O95965_OID30408_v1_Cardiometabolic_II	76	Inverse variance weighted	-0.111669	0.0486193035499436	0.894340643074268	0.813050237322003	0.983758627866584	0.0216305014886262
ITGBL1_O95965_OID30408_v1_Cardiometabolic_II	76	Simple mode	0.0690575441127996	0.147329376120693	1.07149786576839	0.802753141109704	1.43021262396944	0.640622970552915
ITGBL1_O95965_OID30408_v1_Cardiometabolic_II	76	Weighted mode	-0.0713623	0.0783945166428437	0.931124482510696	0.798503798037099	1.08577166954255	0.365582160825502
ITIH4_Q14624_OID30762_v1_Inflammation_II	43	MR Egger	-0.167093	0.125490458092061	0.846120544069501	0.661626064222749	1.08206132407662	0.19037298251604
ITIH4_Q14624_OID30762_v1_Inflammation_II	43	Weighted median	-0.141768	0.106762723252149	0.867822435901671	0.703967499230015	1.06981612230402	0.184217544772819
ITIH4_Q14624_OID30762_v1_Inflammation_II	43	Inverse variance weighted	-0.161842	0.0737424964766273	0.850575712586215	0.736108948807594	0.982842341495093	0.028185910445273
ITIH4_Q14624_OID30762_v1_Inflammation_II	43	Simple mode	-0.218988	0.179126733995906	0.803331016515951	0.565481994551333	1.14122240551369	0.228322268920495
ITIH4_Q14624_OID30762_v1_Inflammation_II	43	Weighted mode	-0.151723	0.10300336192721	0.859226162177326	0.702148965706434	1.05144297553326	0.148208571016808
JCHAIN_P01591_OID20494_v1_Inflammation	47	MR Egger	-0.458347	0.332772542545467	0.632328242223387	0.329367598118672	1.21395974648744	0.175214514350403
JCHAIN_P01591_OID20494_v1_Inflammation	47	Weighted median	-0.383402	0.159680739088567	0.681538901826228	0.498388096391926	0.931995122004737	0.0163479603540837
JCHAIN_P01591_OID20494_v1_Inflammation	47	Inverse variance weighted	-0.304939	0.120507814160735	0.737168571881804	0.582087789483254	0.933566230366514	0.0113917161938731
JCHAIN_P01591_OID20494_v1_Inflammation	47	Simple mode	-0.385429	0.321895414589437	0.6801587810382	0.361915681204234	1.27824239580907	0.237295016630699
JCHAIN_P01591_OID20494_v1_Inflammation	47	Weighted mode	-0.412222	0.267759091797298	0.662177296310629	0.391789818757561	1.11916836721218	0.130527442637531
KAZALD1_Q96I82_OID21339_v1_Oncology	93	MR Egger	0.126809937143878	0.0499273979521318	1.13520123768674	1.02937542740475	1.25190655978112	0.0127846027465767
KAZALD1_Q96I82_OID21339_v1_Oncology	93	Weighted median	0.103360288856651	0.0396647536356733	1.10889085813259	1.02594831653348	1.19853886929197	0.00916473248954795
KAZALD1_Q96I82_OID21339_v1_Oncology	93	Inverse variance weighted	0.11832757970066	0.0395559783489241	1.12561277887721	1.04164152907052	1.21635331600331	0.00277705474015429
KAZALD1_Q96I82_OID21339_v1_Oncology	93	Simple mode	0.127203791644561	0.149167292519669	1.13564842986193	0.847754574710746	1.52130981621409	0.396007444083925
KAZALD1_Q96I82_OID21339_v1_Oncology	93	Weighted mode	0.114750277485996	0.0395984014724642	1.12159331549456	1.03783562065587	1.21211060819738	0.00469615479081095
KDM3A_Q9Y4C1_OID30426_v1_Inflammation_II	15	MR Egger	-0.388184	0.553423352320225	0.678287314870374	0.229261023691028	2.00676798047494	0.495404184831898
KDM3A_Q9Y4C1_OID30426_v1_Inflammation_II	15	Weighted median	-0.567808	0.248283563405468	0.566766152773852	0.34838598081664	0.92203443771504	0.0221995895442839
KDM3A_Q9Y4C1_OID30426_v1_Inflammation_II	15	Inverse variance weighted	-0.482031	0.205716620989499	0.617528029386072	0.412617033062875	0.92420049712135	0.0191202189566746
KDM3A_Q9Y4C1_OID30426_v1_Inflammation_II	15	Simple mode	0.184157153503928	0.414327112832501	1.20220473893868	0.533698616648438	2.70807566150894	0.663494462019181
KDM3A_Q9Y4C1_OID30426_v1_Inflammation_II	15	Weighted mode	-0.453535	0.314643592836495	0.635378046850325	0.342927388408637	1.17723248729924	0.171457670396724
KDR_P35968_OID21497_v1_Oncology	124	MR Egger	0.136685501196566	0.0556251296485404	1.1464675291501	1.02804634333849	1.27852971212092	0.0154057748918404
KDR_P35968_OID21497_v1_Oncology	124	Weighted median	0.112849469821508	0.0646300769120472	1.11946340723829	0.986269652110672	1.2706447141141	0.0807965539168277
KDR_P35968_OID21497_v1_Oncology	124	Inverse variance weighted	0.133367749282393	0.0383777388163681	1.14267013719624	1.05987118929018	1.23193748035979	0.00051059999657619
KDR_P35968_OID21497_v1_Oncology	124	Simple mode	0.108942090103478	0.105988560960031	1.11509777327498	0.905927960970424	1.37256282787745	0.306029718018316
KDR_P35968_OID21497_v1_Oncology	124	Weighted mode	0.123586815765757	0.0570316014028663	1.13154823650462	1.01187482956624	1.26537529556455	0.0321631038094806
KIR2DL2_P43627_OID31431_v1_Oncology_II	221	MR Egger	-0.0793398	0.0499266557279235	0.923725984290899	0.837615553605921	1.01868893238775	0.113474276401086
KIR2DL2_P43627_OID31431_v1_Oncology_II	221	Weighted median	-0.0108891	0.0419753552150415	0.989169930226799	0.911046957458381	1.07399200760691	0.795313125822621
KIR2DL2_P43627_OID31431_v1_Oncology_II	221	Inverse variance weighted	-0.0529778	0.0261741872306566	0.94840105144859	0.90097368962129	0.998324995224741	0.0429651942427535
KIR2DL2_P43627_OID31431_v1_Oncology_II	221	Simple mode	-0.036993	0.0918175681481294	0.963682919864639	0.804965875334717	1.15369458320538	0.687415746081838
KIR2DL2_P43627_OID31431_v1_Oncology_II	221	Weighted mode	-0.020171	0.0528211059850182	0.980031103702299	0.883644596732046	1.08693129316468	0.702923951665451
KIR2DL3_P43628_OID21196_v1_Oncology	209	MR Egger	-0.0653506	0.0407463711221333	0.936739023051161	0.864837676490666	1.0146181429878	0.110274535753314
KIR2DL3_P43628_OID21196_v1_Oncology	209	Weighted median	-0.0973516	0.0384892129026374	0.907236956014241	0.841313878742012	0.978325587102769	0.0114283147004039
KIR2DL3_P43628_OID21196_v1_Oncology	209	Inverse variance weighted	-0.0560768	0.0248022406598159	0.945466538038266	0.900604410387229	0.992563398802049	0.0237619632778863
KIR2DL3_P43628_OID21196_v1_Oncology	209	Simple mode	-0.0116279	0.0799361028129175	0.988439423673903	0.845098001012026	1.15609372297982	0.884484475041401
KIR2DL3_P43628_OID21196_v1_Oncology	209	Weighted mode	-0.065334	0.0336732700701419	0.936754493583802	0.87692513628938	1.00066578654882	0.0537030505449329
KLB_Q86Z14_OID20888_v1_Neurology	161	MR Egger	-0.0308897	0.0442527012571689	0.969582514084373	0.889029382842852	1.05743439953812	0.486178215405308
KLB_Q86Z14_OID20888_v1_Neurology	161	Weighted median	-0.105689	0.0435685041085648	0.899704529547316	0.826063907899259	0.979909947338693	0.0152743059784593
KLB_Q86Z14_OID20888_v1_Neurology	161	Inverse variance weighted	-0.0629032	0.0298052180001067	0.939034324784172	0.885749169282126	0.995525024130169	0.0348172360774946
KLB_Q86Z14_OID20888_v1_Neurology	161	Simple mode	-0.153102	0.0836540539668471	0.858041951282394	0.72828397434435	1.01091883948608	0.0690833214273819
KLB_Q86Z14_OID20888_v1_Neurology	161	Weighted mode	-0.0672522	0.0390198439442847	0.934959351933535	0.866120600440416	1.00926936655643	0.0867228061458934
KLF4_O43474_OID30808_v1_Neurology_II	3	MR Egger	1.30430430495783	1.01925524708165	3.6851244788838	0.499855621468045	27.1681298391415	0.4222892110945
KLF4_O43474_OID30808_v1_Neurology_II	3	Weighted median	0.90756419140924	0.487987863878665	2.47827856318137	0.952283950060762	6.44961477753818	0.0629125622128557
KLF4_O43474_OID30808_v1_Neurology_II	3	Inverse variance weighted	0.90823832430034	0.440011547493236	2.47994981553392	1.0468814437263	5.87473502794707	0.0390059762998201
KLF4_O43474_OID30808_v1_Neurology_II	3	Simple mode	0.697000853707091	0.628172457741736	2.00772221618612	0.586127952967128	6.87725005600161	0.38272844363039
KLF4_O43474_OID30808_v1_Neurology_II	3	Weighted mode	0.982999374102455	0.544766658851581	2.67245994002071	0.918748117674689	7.77366722567189	0.212927535473029
KLK3_P07288_OID30364_v1_Cardiometabolic_II	6	MR Egger	0.285951820849797	1.01685271929322	1.33102832589382	0.181394781620847	9.76674405129687	0.792494654629852
KLK3_P07288_OID30364_v1_Cardiometabolic_II	6	Weighted median	1.15689036899396	0.640398719227621	3.18002916773574	0.906384997913591	11.1570530524316	0.0708378170981741
KLK3_P07288_OID30364_v1_Cardiometabolic_II	6	Inverse variance weighted	1.48507596456736	0.539596613076912	4.41530080645494	1.53336796882601	12.7137657808305	0.00591969705924595
KLK3_P07288_OID30364_v1_Cardiometabolic_II	6	Simple mode	2.51010147238958	1.18049600283684	12.3061787345192	1.21692758192152	124.446217914468	0.0868087571962832
KLK3_P07288_OID30364_v1_Cardiometabolic_II	6	Weighted mode	0.29432100277974	0.697312623160285	1.34221468916783	0.342182267282342	5.26485573354217	0.690501301120299
KLKB1_P03952_OID30760_v1_Inflammation_II	87	MR Egger	0.0645319204398283	0.0731448772469258	1.06665962594564	0.9241951401827	1.23108498211491	0.380130912063164
KLKB1_P03952_OID30760_v1_Inflammation_II	87	Weighted median	0.0773612740400575	0.0678260512269494	1.08043233804843	0.945938439696043	1.23404863161697	0.254043292058954
KLKB1_P03952_OID30760_v1_Inflammation_II	87	Inverse variance weighted	0.0939923942180682	0.0444067350217538	1.09855139054308	1.00697943710783	1.19845064674832	0.0342917082478555
KLKB1_P03952_OID30760_v1_Inflammation_II	87	Simple mode	0.279597103887556	0.125045823054442	1.32259683585407	1.03510957502286	1.68992967741852	0.0279435949153928
KLKB1_P03952_OID30760_v1_Inflammation_II	87	Weighted mode	0.10841315341451	0.0613947527206407	1.1145081131111	0.988150206501383	1.25702380672298	0.0809721678988219
LACRT_Q9GZZ8_OID31367_v1_Oncology_II	24	MR Egger	0.346651380753931	0.307596644498738	1.41432357899546	0.773957712062157	2.58452258428026	0.271898779572614
LACRT_Q9GZZ8_OID31367_v1_Oncology_II	24	Weighted median	0.371426121541273	0.174323655887138	1.44980073310117	1.03019876154904	2.04030740877631	0.0331163677370951
LACRT_Q9GZZ8_OID31367_v1_Oncology_II	24	Inverse variance weighted	0.289173110586459	0.123943224879428	1.3353228670463	1.0473303365582	1.70250693311952	0.0196424010379962
LACRT_Q9GZZ8_OID31367_v1_Oncology_II	24	Simple mode	0.0968680506954263	0.298295517244139	1.10171499350259	0.613981081558854	1.97689466884992	0.748314180251713
LACRT_Q9GZZ8_OID31367_v1_Oncology_II	24	Weighted mode	0.291925375920747	0.213038960992744	1.33900309203805	0.881940233604024	2.03293739436368	0.183823811369877
LAG3_P18627_OID21315_v1_Oncology	59	MR Egger	0.26551323502303	0.173301954554606	1.30410011390311	0.928524421993151	1.83159114267719	0.131033404775121
LAG3_P18627_OID21315_v1_Oncology	59	Weighted median	0.324968030249115	0.126394574633379	1.38398639957306	1.08029555309128	1.77305029972788	0.0101387770765125
LAG3_P18627_OID21315_v1_Oncology	59	Inverse variance weighted	0.295402740060923	0.0825665141489341	1.34366739841968	1.14290397776476	1.57969708103291	0.000346558361009089
LAG3_P18627_OID21315_v1_Oncology	59	Simple mode	0.309495043569636	0.261301121639696	1.36273681764797	0.816559779563718	2.27423843379296	0.241070692074182
LAG3_P18627_OID21315_v1_Oncology	59	Weighted mode	0.309495043569636	0.145240692755479	1.36273681764797	1.02513394875955	1.81152095920773	0.0373471033900684
LAIR2_Q6ISS4_OID20965_v1_Neurology	87	MR Egger	0.015046584254211	0.0497988365859721	1.01516035400224	0.920756986864116	1.11924270903201	0.763277851405205
LAIR2_Q6ISS4_OID20965_v1_Neurology	87	Weighted median	0.0822408018957312	0.0486418383973703	1.08571722111919	0.986988193759741	1.19432217293749	0.0908860780954813
LAIR2_Q6ISS4_OID20965_v1_Neurology	87	Inverse variance weighted	0.0882121970104	0.0340725753090936	1.09221986322961	1.02166121985386	1.16765147433505	0.00962690456157766
LAIR2_Q6ISS4_OID20965_v1_Neurology	87	Simple mode	0.110056725228181	0.0850595362480171	1.11634139338312	0.944915318252992	1.31886750326435	0.199171408075483
LAIR2_Q6ISS4_OID20965_v1_Neurology	87	Weighted mode	0.093828916235404	0.0533195773209637	1.09837181625652	0.989379346366745	1.2193711655463	0.0820068839933529
LAMP3_Q9UQV4_OID20638_v1_Inflammation	47	MR Egger	0.273951629765803	0.161879337349663	1.31515118652929	0.95759353938076	1.80621795396392	0.0974990255106588
LAMP3_Q9UQV4_OID20638_v1_Inflammation	47	Weighted median	0.326105549796115	0.12495042931445	1.38556160690006	1.08459072987119	1.7700510557964	0.00905741509591835
LAMP3_Q9UQV4_OID20638_v1_Inflammation	47	Inverse variance weighted	0.322848542276877	0.0879172916302164	1.38105616344248	1.16245093447063	1.6407712962535	0.000240485670313836
LAMP3_Q9UQV4_OID20638_v1_Inflammation	47	Simple mode	0.355796736237435	0.220781465915329	1.42731739687175	0.925950096777995	2.20015631350076	0.113904678050047
LAMP3_Q9UQV4_OID20638_v1_Inflammation	47	Weighted mode	0.265748413683513	0.11731595517433	1.3044068464881	1.03645801083431	1.64162677443672	0.0282519536457903
LBP_P18428_OID20355_v1_Cardiometabolic	69	MR Egger	0.055372084545288	0.058471851489152	1.05693381025615	0.942487384991971	1.18527748705315	0.347048424476858
LBP_P18428_OID20355_v1_Cardiometabolic	69	Weighted median	0.0687119346076399	0.0609875596933044	1.07112760990688	0.950446236167226	1.20713230590664	0.259888406289841
LBP_P18428_OID20355_v1_Cardiometabolic	69	Inverse variance weighted	0.109607783533279	0.0415125486078417	1.1158403336676	1.02864580859287	1.21042601820605	0.0082819705342197
LBP_P18428_OID20355_v1_Cardiometabolic	69	Simple mode	0.158427633929415	0.108829737517727	1.17166713221081	0.94660000937575	1.45024704743921	0.15006644656243
LBP_P18428_OID20355_v1_Cardiometabolic	69	Weighted mode	0.0846160424435487	0.0564923288797543	1.08829912579472	0.974228968705039	1.21572548677122	0.138804673975248
LECT2_O14960_OID30320_v1_Cardiometabolic_II	113	MR Egger	-0.0991711	0.0530253826602696	0.905587705737195	0.816195885179451	1.00476994269831	0.0640823912826603
LECT2_O14960_OID30320_v1_Cardiometabolic_II	113	Weighted median	-0.0464452	0.0536329316824329	0.954616914893794	0.859361419244941	1.06043095930701	0.386500014771929
LECT2_O14960_OID30320_v1_Cardiometabolic_II	113	Inverse variance weighted	-0.0865149	0.0367379479183069	0.917121908658465	0.853404828267065	0.985596246331672	0.0185267693544082
LECT2_O14960_OID30320_v1_Cardiometabolic_II	113	Simple mode	-0.0561929	0.0916433524373488	0.945356789087453	0.789927714033089	1.13136865917873	0.541007747473538
LECT2_O14960_OID30320_v1_Cardiometabolic_II	113	Weighted mode	-0.0723528	0.0506650116851167	0.930202697689954	0.84226870802431	1.02731711453383	0.15605668925363
LGALS1_P09382_OID20154_v1_Cardiometabolic	30	MR Egger	0.235816461402811	0.165415704499536	1.26594193963533	0.915396184022371	1.75072719604924	0.165037829661021
LGALS1_P09382_OID20154_v1_Cardiometabolic	30	Weighted median	0.110534717506389	0.124026712216766	1.11687512349827	0.875852449883758	1.42422395650642	0.372812752497199
LGALS1_P09382_OID20154_v1_Cardiometabolic	30	Inverse variance weighted	0.262312158896118	0.0831252683915985	1.29993226452193	1.1044932503886	1.52995402348595	0.00160154731065692
LGALS1_P09382_OID20154_v1_Cardiometabolic	30	Simple mode	-0.00225774	0.240643914354412	0.997744808624634	0.622557173249152	1.59904141485011	0.992578546314651
LGALS1_P09382_OID20154_v1_Cardiometabolic	30	Weighted mode	0.0920588410112644	0.125644720140022	1.09642933519365	0.857096460710671	1.4025927561017	0.46962765667001
LGALS4_P56470_OID20748_v1_Inflammation	60	MR Egger	0.12330604025279	0.0916964687452446	1.13123057006663	0.945143001604206	1.35395659755323	0.183951077105939
LGALS4_P56470_OID20748_v1_Inflammation	60	Weighted median	0.157404425173488	0.0744508395413777	1.17046888527502	1.01154693675923	1.3543587169431	0.0344976611497987
LGALS4_P56470_OID20748_v1_Inflammation	60	Inverse variance weighted	0.122284080724031	0.0541970765766935	1.13007508873447	1.01618743014735	1.25672653320761	0.0240527537708926
LGALS4_P56470_OID20748_v1_Inflammation	60	Simple mode	0.0963776048875453	0.119625709697279	1.10117479448255	0.87102135370691	1.3921425954061	0.423674367815392
LGALS4_P56470_OID20748_v1_Inflammation	60	Weighted mode	0.141055469324813	0.0690862972985184	1.15148851850395	1.00566229716602	1.31846029425873	0.0456576463717919
LGALS9_O00182_OID20781_v1_Inflammation	78	MR Egger	0.000703373645847632	0.079716108177662	1.0007036210711	0.855952668324697	1.16993354221887	0.992983091760547
LGALS9_O00182_OID20781_v1_Inflammation	78	Weighted median	0.044356755961627	0.0805787831734424	1.04535522508122	0.892634872535782	1.22420440902146	0.581992340508612
LGALS9_O00182_OID20781_v1_Inflammation	78	Inverse variance weighted	0.105948216178308	0.0481325325463077	1.11176430361141	1.01167609194778	1.22175454834052	0.0277235067789866
LGALS9_O00182_OID20781_v1_Inflammation	78	Simple mode	0.307320878111962	0.142102365477547	1.35977722082356	1.02921897898374	1.79650213222493	0.0336704362272452
LGALS9_O00182_OID20781_v1_Inflammation	78	Weighted mode	0.0266892450401599	0.0790569615979393	1.02704859272382	0.879622536177012	1.1991834774953	0.736586918485596
LHPP_Q9H008_OID20749_v1_Inflammation	53	MR Egger	-0.146503	0.0818123451290025	0.863723403711401	0.735757357088214	1.01394584903806	0.0792748276702771
LHPP_Q9H008_OID20749_v1_Inflammation	53	Weighted median	-0.123975	0.0737992453580982	0.883402325628322	0.764432868744044	1.02088711884893	0.0929788966067068
LHPP_Q9H008_OID20749_v1_Inflammation	53	Inverse variance weighted	-0.104569	0.0506965090771311	0.900712935801275	0.815516327106634	0.994809994299074	0.0391467864922691
LHPP_Q9H008_OID20749_v1_Inflammation	53	Simple mode	-0.127007	0.121059319555734	0.88072763462494	0.694694483627446	1.11657884821787	0.29897040702819
LHPP_Q9H008_OID20749_v1_Inflammation	53	Weighted mode	-0.127007	0.0674428222579385	0.88072763462494	0.771672696388954	1.00519452096963	0.0652748657489906
LIPF_P07098_OID30266_v1_Cardiometabolic_II	57	MR Egger	-0.22095	0.102324241817351	0.801756557197187	0.656058199122624	0.979811818323969	0.0352033783076057
LIPF_P07098_OID30266_v1_Cardiometabolic_II	57	Weighted median	-0.135261	0.0892172108414951	0.873487630216894	0.733353782160057	1.04039913436405	0.129496626329511
LIPF_P07098_OID30266_v1_Cardiometabolic_II	57	Inverse variance weighted	-0.146122	0.0619149356175836	0.864052118946945	0.765309108818296	0.975535317238678	0.0182725951220831
LIPF_P07098_OID30266_v1_Cardiometabolic_II	57	Simple mode	-0.217683	0.160557989560527	0.8043802098719	0.587207585739173	1.10187187248116	0.180607867530149
LIPF_P07098_OID30266_v1_Cardiometabolic_II	57	Weighted mode	-0.168957	0.0868978437712254	0.844545262951855	0.712285317777505	1.0013637560296	0.0568868947138472
LRRN1_Q6UXK5_OID20438_v1_Inflammation	103	MR Egger	0.0944857289846458	0.0638070357662213	1.09909347784117	0.96988665859884	1.24551303219096	0.141771639474046
LRRN1_Q6UXK5_OID20438_v1_Inflammation	103	Weighted median	0.0924130230232162	0.058190010391586	1.09681773952041	0.978593054687915	1.22932525217064	0.112258026576274
LRRN1_Q6UXK5_OID20438_v1_Inflammation	103	Inverse variance weighted	0.0783139343539945	0.039048251438212	1.08146	1.0017809455382	1.16748108269774	0.0449023293335254
LRRN1_Q6UXK5_OID20438_v1_Inflammation	103	Simple mode	0.108184388569892	0.116784217433659	1.11425318199653	0.886288573572955	1.40085316522158	0.356444889386631
LRRN1_Q6UXK5_OID20438_v1_Inflammation	103	Weighted mode	0.0641790872559844	0.0751099704641686	1.06628333942083	0.920317596565167	1.23539978391138	0.394848018160461
LTB_Q06643_OID31383_v1_Oncology_II	65	MR Egger	0.266568121424562	0.181111460835153	1.30547651722644	0.915385178833051	1.8618052557966	0.146040599754345
LTB_Q06643_OID31383_v1_Oncology_II	65	Weighted median	0.255298452095799	0.0982334908972799	1.29084681932697	1.06477212585834	1.56492217489571	0.00935245870759149
LTB_Q06643_OID31383_v1_Oncology_II	65	Inverse variance weighted	0.203691417413181	0.072794839491968	1.22591979757983	1.0629132974421	1.41392468578089	0.00513950634871525
LTB_Q06643_OID31383_v1_Oncology_II	65	Simple mode	0.248113300928783	0.178017327403165	1.28160513101996	0.904113240150878	1.81671016296874	0.168211258956448
LTB_Q06643_OID31383_v1_Oncology_II	65	Weighted mode	0.248113300928783	0.125411416176807	1.28160513101996	1.00230958822162	1.63872692744662	0.0521917797902213
LY75_O60449_OID20580_v1_Inflammation	173	MR Egger	0.101629810275572	0.0304507058123236	1.10697360561449	1.04283860913984	1.17505293032628	0.00103722176639949
LY75_O60449_OID20580_v1_Inflammation	173	Weighted median	0.132045281967239	0.0343328202526565	1.14115999206668	1.06689541986868	1.22059398066767	0.000120043857855604
LY75_O60449_OID20580_v1_Inflammation	173	Inverse variance weighted	0.115247013093658	0.0206121338126445	1.12215058922908	1.07771949598513	1.16841344115812	2.25477259414442e-08
LY75_O60449_OID20580_v1_Inflammation	173	Simple mode	0.103983319295095	0.0560549178775397	1.1095819461522	0.9941329589568	1.2384380621671	0.0653041423702288
LY75_O60449_OID20580_v1_Inflammation	173	Weighted mode	0.103983319295095	0.0287502665217467	1.1095819461522	1.04878546734593	1.17390270323113	0.00039174840057298
MAMDC2_Q7Z304_OID30309_v1_Cardiometabolic_II	61	MR Egger	-0.0247784	0.15094661060618	0.975526085507967	0.725688996502908	1.31137601381928	0.870171561850799
MAMDC2_Q7Z304_OID30309_v1_Cardiometabolic_II	61	Weighted median	0.239765512716803	0.125540524421293	1.27095109350851	0.993725850046458	1.62551540952161	0.0561505369595531
MAMDC2_Q7Z304_OID30309_v1_Cardiometabolic_II	61	Inverse variance weighted	0.173021479648608	0.0789198525511364	1.18889164178447	1.01850775281449	1.38777867129541	0.0283528352821202
MAMDC2_Q7Z304_OID30309_v1_Cardiometabolic_II	61	Simple mode	0.550709486169483	0.252342576081262	1.7344831732493	1.05772252681542	2.84425433137245	0.0330066262010058
MAMDC2_Q7Z304_OID30309_v1_Cardiometabolic_II	61	Weighted mode	0.213073093775408	0.145480402684034	1.23747509966496	0.930467160828716	1.64578040661523	0.148245747139976
MAN2B2_Q9Y2E5_OID30306_v1_Cardiometabolic_II	139	MR Egger	0.0816766343879141	0.0421288926397404	1.08510486749161	0.999104406097851	1.17850803806651	0.0545899357860316
MAN2B2_Q9Y2E5_OID30306_v1_Cardiometabolic_II	139	Weighted median	0.0675304486487749	0.0465731855279147	1.06986283497966	0.976526887008146	1.17211978584382	0.14706253314204
MAN2B2_Q9Y2E5_OID30306_v1_Cardiometabolic_II	139	Inverse variance weighted	0.107976355347536	0.0299187180609881	1.11402140442611	1.05057293522245	1.18130179058605	0.000307391415688796
MAN2B2_Q9Y2E5_OID30306_v1_Cardiometabolic_II	139	Simple mode	0.0565535057706157	0.0798563334093533	1.05818323219483	0.904869171408629	1.23747364622352	0.480021364324553
MAN2B2_Q9Y2E5_OID30306_v1_Cardiometabolic_II	139	Weighted mode	0.0869742202987016	0.0375830280348395	1.09086855709023	1.01340047760615	1.17425858300275	0.0221339649050703
MANSC4_A6NHS7_OID30141_v1_Cardiometabolic_II	135	MR Egger	0.0950874748320419	0.0477743391053957	1.09975505180709	1.00145082161031	1.20770900365375	0.0486029241772568
MANSC4_A6NHS7_OID30141_v1_Cardiometabolic_II	135	Weighted median	0.0702656032896265	0.0513079947067783	1.07279308078876	0.970156319508993	1.18628820020542	0.170847268948247
MANSC4_A6NHS7_OID30141_v1_Cardiometabolic_II	135	Inverse variance weighted	0.0879788037405624	0.0334996815700005	1.09196497620996	1.02257036977579	1.16606890294569	0.00863293775099749
MANSC4_A6NHS7_OID30141_v1_Cardiometabolic_II	135	Simple mode	0.0326113549647307	0.099685590987308	1.03314893300172	0.849784574511794	1.25608	0.744070886762036
MANSC4_A6NHS7_OID30141_v1_Cardiometabolic_II	135	Weighted mode	0.0712851631661855	0.0415685616061223	1.07388741534479	0.989862516636155	1.16504480314594	0.0886785936314185
MATN3_O15232_OID20979_v1_Neurology	89	MR Egger	-0.0883123	0.0621919328239388	0.915474886604072	0.81041522847028	1.03415414538138	0.159182207901389
MATN3_O15232_OID20979_v1_Neurology	89	Weighted median	-0.106231	0.0578907402484312	0.89921677694735	0.802762003406597	1.00726094223724	0.0665015073565169
MATN3_O15232_OID20979_v1_Neurology	89	Inverse variance weighted	-0.0841588	0.0386753396839128	0.919285278284094	0.852175789210239	0.991679690469797	0.0295528571742136
MATN3_O15232_OID20979_v1_Neurology	89	Simple mode	-0.0602449	0.102871086469981	0.941533917670033	0.769609345891691	1.15186506356153	0.559619759418128
MATN3_O15232_OID20979_v1_Neurology	89	Weighted mode	-0.109231	0.062488132247583	0.896523361875134	0.793177961905898	1.01333392629389	0.0839471642025582
MBL2_P11226_OID30759_v1_Inflammation_II	134	MR Egger	-0.0246308	0.039912331743233	0.975670032664906	0.90225418123932	1.05505968543452	0.538216420593425
MBL2_P11226_OID30759_v1_Inflammation_II	134	Weighted median	-0.0421837	0.0423659899957141	0.958693682153478	0.882301884089672	1.04169966399798	0.319397619989088
MBL2_P11226_OID30759_v1_Inflammation_II	134	Inverse variance weighted	-0.0583668	0.0292717136938194	0.943303856023307	0.890707325299592	0.999006227426215	0.046155681924304
MBL2_P11226_OID30759_v1_Inflammation_II	134	Simple mode	-0.0613539	0.0723717702714994	0.940490339947302	0.816112903697896	1.08382317633544	0.398094624678207
MBL2_P11226_OID30759_v1_Inflammation_II	134	Weighted mode	-0.0378948	0.0367563001786426	0.962814271024115	0.895890485828554	1.03473732018748	0.304424683893982
MCAM_P43121_OID20343_v1_Cardiometabolic	33	MR Egger	-0.127087	0.189197435035279	0.880656856251212	0.607797084657888	1.27601220545309	0.506738949548234
MCAM_P43121_OID20343_v1_Cardiometabolic	33	Weighted median	0.0803979844006123	0.153587260412392	1.08371828483244	0.802010927411016	1.46437570953229	0.600648757337011
MCAM_P43121_OID20343_v1_Cardiometabolic	33	Inverse variance weighted	0.245756309500168	0.122221532149204	1.27858795583611	1.00622137937373	1.62467941381512	0.0443524199799643
MCAM_P43121_OID20343_v1_Cardiometabolic	33	Simple mode	-0.0306428	0.270206147927016	0.969821973415941	0.571068102948151	1.64700962155784	0.910417891421408
MCAM_P43121_OID20343_v1_Cardiometabolic	33	Weighted mode	0.00984815830075902	0.144551128730034	1.0098968109937	0.760733595512179	1.3406685006051	0.946106687494154
MDM1_Q8TC05_OID30945_v1_Neurology_II	9	MR Egger	0.1317524321506	0.339981924598932	1.14082585250099	0.585896491856965	2.22135418768191	0.709879277098327
MDM1_Q8TC05_OID30945_v1_Neurology_II	9	Weighted median	0.319641267922408	0.188363238559884	1.37663383303175	0.951656927269592	1.99139065344166	0.0897078501880398
MDM1_Q8TC05_OID30945_v1_Neurology_II	9	Inverse variance weighted	0.311242359567113	0.156076484791394	1.36512003099685	1.00534669218926	1.8536418466457	0.0461339583098278
MDM1_Q8TC05_OID30945_v1_Neurology_II	9	Simple mode	0.481887360207797	0.340475442942687	1.61912739685649	0.830734933478143	3.15572804465463	0.194697550211717
MDM1_Q8TC05_OID30945_v1_Neurology_II	9	Weighted mode	0.288539176462776	0.207397224779591	1.3344766285728	0.888732148533009	2.0037846893989	0.201620838677676
MEP1B_Q16820_OID20168_v1_Cardiometabolic	147	MR Egger	-0.0561732	0.0347619279433738	0.945375427069877	0.883109098342564	1.01203203520939	0.108281228098751
MEP1B_Q16820_OID20168_v1_Cardiometabolic	147	Weighted median	-0.0157198	0.0334053287990543	0.984403107987086	0.922014574859967	1.05101318941928	0.637942326149011
MEP1B_Q16820_OID20168_v1_Cardiometabolic	147	Inverse variance weighted	-0.0603294	0.0269136117429816	0.941454375320069	0.893079147834253	0.992449933422695	0.0249876216588431
MEP1B_Q16820_OID20168_v1_Cardiometabolic	147	Simple mode	-0.0493207	0.060460090885602	0.951875770052375	0.845503877606708	1.07163019071838	0.415967960841976
MEP1B_Q16820_OID20168_v1_Cardiometabolic	147	Weighted mode	-0.0341174	0.0297914362822529	0.966458056004296	0.911641376092045	1.02457084387677	0.253996960086177
MERTK_Q12866_OID20657_v1_Inflammation	91	MR Egger	-0.263405	0.130019700121578	0.76843044928396	0.595565541919911	0.991469979077726	0.0457709386798094
MERTK_Q12866_OID20657_v1_Inflammation	91	Weighted median	-0.177686	0.107677934708636	0.837205036687168	0.677913876889088	1.03392524824955	0.0989093580829575
MERTK_Q12866_OID20657_v1_Inflammation	91	Inverse variance weighted	-0.153175	0.0611574410138472	0.857979451473297	0.761059518326582	0.967242011201725	0.012258879891062
MERTK_Q12866_OID20657_v1_Inflammation	91	Simple mode	-0.130572	0.192455316815499	0.877593552587339	0.601827669677802	1.27971923250918	0.499225862120683
MERTK_Q12866_OID20657_v1_Inflammation	91	Weighted mode	-0.176693	0.110792514915475	0.838036655828829	0.674457397687786	1.04128954463314	0.114259731188978
MFAP3L_O75121_OID30933_v1_Neurology_II	3	MR Egger	-0.299252	0.14117605737537	0.741372727742857	0.562166704299269	0.977705576010578	0.280624742060907
MFAP3L_O75121_OID30933_v1_Neurology_II	3	Weighted median	-0.269687	0.143734017789349	0.763618466579396	0.576139374053508	1.01210434273654	0.0606151795508199
MFAP3L_O75121_OID30933_v1_Neurology_II	3	Inverse variance weighted	-0.266156	0.122464836522876	0.766319819114887	0.602789785455843	0.974213696610973	0.0297559959232834
MFAP3L_O75121_OID30933_v1_Neurology_II	3	Simple mode	-0.165806	0.283690928743372	0.847210777262492	0.485857463014916	1.4773182584368	0.618057036445193
MFAP3L_O75121_OID30933_v1_Neurology_II	3	Weighted mode	-0.277277	0.134080322611352	0.757844185344882	0.582704602074197	0.98562428924822	0.174556860711152
MIA_Q16674_OID21531_v1_Oncology	92	MR Egger	-0.126107	0.0481198067456111	0.881520919461911	0.80218071427136	0.968708319240525	0.0103010581573224
MIA_Q16674_OID21531_v1_Oncology	92	Weighted median	-0.088513	0.0533199672126322	0.915291205072874	0.824465366629007	1.01612271902833	0.0969074280750744
MIA_Q16674_OID21531_v1_Oncology	92	Inverse variance weighted	-0.109323	0.0345502260699426	0.896441264899689	0.837745480499535	0.959249509690909	0.00155530326871277
MIA_Q16674_OID21531_v1_Oncology	92	Simple mode	-0.129756	0.0891650039078819	0.878309846103308	0.737477827688624	1.04603576785461	0.149045857098407
MIA_Q16674_OID21531_v1_Oncology	92	Weighted mode	-0.0950004	0.0461484069519849	0.909372608274109	0.830729344006322	0.995460852136412	0.042393013900785
MILR1_Q7Z6M3_OID20482_v1_Inflammation	114	MR Egger	0.0382413416969602	0.0536222602574734	1.03898195229023	0.935327738728701	1.15412325807001	0.477229026383718
MILR1_Q7Z6M3_OID20482_v1_Inflammation	114	Weighted median	0.0923334616876493	0.0630222948441819	1.09673047870752	0.969291161261734	1.24092511207912	0.142895811707913
MILR1_Q7Z6M3_OID20482_v1_Inflammation	114	Inverse variance weighted	0.0790417035167732	0.0362447153224014	1.0822494547375	1.0080341635493	1.16192875661632	0.0291997880239437
MILR1_Q7Z6M3_OID20482_v1_Inflammation	114	Simple mode	-0.00264965	0.117303055094944	0.997353860017531	0.792499316901207	1.25516	0.982018715301402
MILR1_Q7Z6M3_OID20482_v1_Inflammation	114	Weighted mode	0.0409865248473329	0.0580058704276124	1.04183806652389	0.929875120214103	1.16728207182091	0.481274072426368
MME_P08473_OID21307_v1_Oncology	89	MR Egger	-0.160316	0.0753226860766256	0.851874495599704	0.734953142613556	0.987396493975974	0.0361323374004529
MME_P08473_OID21307_v1_Oncology	89	Weighted median	-0.118494	0.077129611987655	0.888257131802797	0.763632936741177	1.0332198812241	0.124465480082949
MME_P08473_OID21307_v1_Oncology	89	Inverse variance weighted	-0.142375	0.0482966054419376	0.867295591652896	0.788962276701615	0.953406348457176	0.0031990066610144
MME_P08473_OID21307_v1_Oncology	89	Simple mode	-0.111753	0.129347621488476	0.894264825619146	0.694006008822329	1.15230930016972	0.389949582468824
MME_P08473_OID21307_v1_Oncology	89	Weighted mode	-0.0903538	0.0702439864960947	0.913607922633333	0.796098798782643	1.04846212250885	0.201717636867775
MMP10_P09238_OID20687_v1_Inflammation	92	MR Egger	0.146494099818592	0.085458974799208	1.15776809975649	0.979213587900622	1.36888109946222	0.0899333034806916
MMP10_P09238_OID20687_v1_Inflammation	92	Weighted median	0.125500220789611	0.0713667321124486	1.13371541927309	0.985724303876487	1.30392509025384	0.078658130653346
MMP10_P09238_OID20687_v1_Inflammation	92	Inverse variance weighted	0.108007324122206	0.0455457700773916	1.11405590483818	1.01891426548688	1.21808144330157	0.0177207518457448
MMP10_P09238_OID20687_v1_Inflammation	92	Simple mode	0.140381913991521	0.126191178698257	1.15071318841426	0.898568087766256	1.47361213915596	0.268873076489608
MMP10_P09238_OID20687_v1_Inflammation	92	Weighted mode	0.0925660814374618	0.0757674649732397	1.0969856295525	0.945597619379552	1.27261051295188	0.224971702333813
MMP12_P39900_OID21439_v1_Oncology	84	MR Egger	-0.0384413	0.0556081884574383	0.962288174070148	0.862919936811725	1.07309901006181	0.491336597150335
MMP12_P39900_OID21439_v1_Oncology	84	Weighted median	-0.0365284	0.0581356949357512	0.964130742711268	0.860299813256472	1.08049318937126	0.529788152932495
MMP12_P39900_OID21439_v1_Oncology	84	Inverse variance weighted	-0.0886758	0.0373793489550061	0.915142194759719	0.850492789085717	0.98470586391442	0.0176767167572606
MMP12_P39900_OID21439_v1_Oncology	84	Simple mode	-0.0773742	0.106832717036096	0.925543465842802	0.750687137357431	1.14112879325443	0.470945489427807
MMP12_P39900_OID21439_v1_Oncology	84	Weighted mode	-0.0489294	0.0516913612588355	0.952248369297098	0.860497598489681	1.05378208889894	0.346606651357787
MMUT_P22033_OID30159_v1_Cardiometabolic_II	6	MR Egger	1.53614066023476	0.635207019622326	4.64662272599864	1.33794506294013	16.1375106914484	0.0728945401603185
MMUT_P22033_OID30159_v1_Cardiometabolic_II	6	Weighted median	0.864378407766497	0.282863642329394	2.37353025936824	1.36337830691658	4.13212229031114	0.00224451162151589
MMUT_P22033_OID30159_v1_Cardiometabolic_II	6	Inverse variance weighted	0.677645425464805	0.254558657303849	1.96923555730468	1.19567449504147	3.24326453080238	0.00776685598431499
MMUT_P22033_OID30159_v1_Cardiometabolic_II	6	Simple mode	0.865345940042584	0.384034584076253	2.37582783781387	1.11922687330399	5.04326517667363	0.073970033673542
MMUT_P22033_OID30159_v1_Cardiometabolic_II	6	Weighted mode	0.865345940042584	0.282113900521915	2.37582783781387	1.36670494750534	4.13004864380888	0.0278673001779304
MPO_P05164_OID21100_v1_Neurology	42	MR Egger	0.124735231823333	0.112139353903248	1.1328484711316	0.909320281638234	1.41132413348697	0.272639713090722
MPO_P05164_OID21100_v1_Neurology	42	Weighted median	0.0499613790397006	0.108178466441095	1.05123049606076	0.850383023438283	1.29951507190261	0.644194498522961
MPO_P05164_OID21100_v1_Neurology	42	Inverse variance weighted	0.151043291073883	0.0731092605117079	1.16304700654588	1.00777924276535	1.34223675387834	0.0388290493420782
MPO_P05164_OID21100_v1_Neurology	42	Simple mode	0.175134121371724	0.208567070342525	1.19140599890386	0.791633033170958	1.79306344574629	0.405945545002081
MPO_P05164_OID21100_v1_Neurology	42	Weighted mode	0.0768926169422333	0.105727618355955	1.07992610439875	0.877802621722648	1.32859069009518	0.471192687195624
MRC1_P22897_OID30694_v1_Inflammation_II	64	MR Egger	0.141743829660627	0.228689641317542	1.15228143040048	0.736027448109395	1.8039442662856	0.537655065687974
MRC1_P22897_OID30694_v1_Inflammation_II	64	Weighted median	0.172640222478352	0.120000017381904	1.18843845471728	0.93935687670466	1.5035669570074	0.150244521434261
MRC1_P22897_OID30694_v1_Inflammation_II	64	Inverse variance weighted	0.211978660486705	0.0989023813861708	1.23612150656573	1.01829533902177	1.50054342825747	0.0320880541974414
MRC1_P22897_OID30694_v1_Inflammation_II	64	Simple mode	0.371595510112849	0.276931670939812	1.45004633357679	0.842660976540715	2.4952316863553	0.184467227842765
MRC1_P22897_OID30694_v1_Inflammation_II	64	Weighted mode	0.211898143319961	0.188274457828843	1.23602198157106	0.854601676511179	1.78767533567653	0.264657343109727
MSMB_P08118_OID20275_v1_Cardiometabolic	147	MR Egger	-0.143838	0.0448828668770241	0.866028265787772	0.793098264175126	0.945664605537159	0.00166273557129223
MSMB_P08118_OID20275_v1_Cardiometabolic	147	Weighted median	-0.15911	0.0493738775535748	0.852902326846098	0.774232515016391	0.939565782927741	0.00127050906869996
MSMB_P08118_OID20275_v1_Cardiometabolic	147	Inverse variance weighted	-0.157723	0.0311065593171797	0.854086566168407	0.803569516000762	0.907779411717565	3.96978689033774e-07
MSMB_P08118_OID20275_v1_Cardiometabolic	147	Simple mode	-0.219142	0.0909887804960982	0.803207532611344	0.672011274137209	0.960017138509911	0.017267373985198
MSMB_P08118_OID20275_v1_Cardiometabolic	147	Weighted mode	-0.172578	0.0457344394978924	0.841492665417372	0.769343686425961	0.920407768913795	0.000233435164392345
MSR1_P21757_OID21063_v1_Neurology	90	MR Egger	0.0632920382815568	0.098197191292341	1.0653379132598	0.878820636065921	1.29144085021646	0.520901824104806
MSR1_P21757_OID21063_v1_Neurology	90	Weighted median	0.109519961968794	0.101545788460659	1.11574234312668	0.91437931932902	1.36144918189896	0.280798255384415
MSR1_P21757_OID21063_v1_Neurology	90	Inverse variance weighted	0.134499229213514	0.0622834716539435	1.14396377725024	1.01250111858351	1.29249548434221	0.0308137961412098
MSR1_P21757_OID21063_v1_Neurology	90	Simple mode	0.0707933012056654	0.232371414626791	1.07335934085582	0.680685655804546	1.69255847361835	0.76133956946371
MSR1_P21757_OID21063_v1_Neurology	90	Weighted mode	-0.0505802	0.119430867398045	0.950677708286883	0.752266468283669	1.20142016577668	0.672944906377024
MST1_P26927_OID30713_v1_Inflammation_II	186	MR Egger	-0.0789073	0.0284363777768659	0.924125628616559	0.874028272616069	0.977094453603662	0.00609245184304711
MST1_P26927_OID30713_v1_Inflammation_II	186	Weighted median	-0.07893	0.0362083544401498	0.924104614755068	0.860795455465332	0.992069990134846	0.0292660984886522
MST1_P26927_OID30713_v1_Inflammation_II	186	Inverse variance weighted	-0.0619263	0.0216834561035056	0.93995211459489	0.900841528465852	0.980760710750134	0.00429115080455823
MST1_P26927_OID30713_v1_Inflammation_II	186	Simple mode	-0.129066	0.0737227189527203	0.878916113102123	0.76066490782572	1.01555037694408	0.0816564618232922
MST1_P26927_OID30713_v1_Inflammation_II	186	Weighted mode	-0.0609714	0.034516388405505	0.940850186525131	0.879304979122984	1.00670312860877	0.0789701102128628
MTHFD2_P13995_OID31078_v1_Neurology_II	8	MR Egger	-0.303771	0.311970362758276	0.7380295253033	0.40042317283513	1.36028	0.367801012266032
MTHFD2_P13995_OID31078_v1_Neurology_II	8	Weighted median	-0.331592	0.295586241990802	0.717780063705262	0.402145583014558	1.28114852335473	0.261942553384232
MTHFD2_P13995_OID31078_v1_Neurology_II	8	Inverse variance weighted	-0.464705	0.228549944252631	0.628320572098555	0.40145386115842	0.98339256267974	0.042024796181006
MTHFD2_P13995_OID31078_v1_Neurology_II	8	Simple mode	-0.280394	0.423391357107113	0.755486309079125	0.329479652687631	1.73230595136968	0.528999556652188
MTHFD2_P13995_OID31078_v1_Neurology_II	8	Weighted mode	-0.280394	0.322556528183241	0.755486309079125	0.401477248143025	1.42164858867088	0.413501835583841
NAP1L4_Q99733_OID31475_v1_Oncology_II	31	MR Egger	0.0440742551478475	0.167797243954839	1.0450599530887	0.752158396925116	1.45202168853603	0.794666800843823
NAP1L4_Q99733_OID31475_v1_Oncology_II	31	Weighted median	-0.145014	0.138504978495274	0.865010234050569	0.659361261154449	1.13479931123365	0.295102147699398
NAP1L4_Q99733_OID31475_v1_Oncology_II	31	Inverse variance weighted	-0.239571	0.104611846791986	0.786965677302953	0.641074333878757	0.96605798192823	0.022016044898013
NAP1L4_Q99733_OID31475_v1_Oncology_II	31	Simple mode	-0.386873	0.247830192309347	0.67917734336952	0.417855257943366	1.10392738867725	0.129002601160713
NAP1L4_Q99733_OID31475_v1_Oncology_II	31	Weighted mode	-0.168282	0.136827754985507	0.845115679659973	0.646317660358279	1.10506111129815	0.228299955161073
NCAM2_O15394_OID21095_v1_Neurology	123	MR Egger	-0.101695	0.0601135264890981	0.90330512949204	0.802906196520615	1.01625838796933	0.0932744466213321
NCAM2_O15394_OID21095_v1_Neurology	123	Weighted median	-0.120475	0.0569557328919928	0.886498939117158	0.792860024621165	0.991196862814904	0.0344090400732313
NCAM2_O15394_OID21095_v1_Neurology	123	Inverse variance weighted	-0.141479	0.0369921219645655	0.868073538377607	0.80736178281563	0.933350678804053	0.000131002156302412
NCAM2_O15394_OID21095_v1_Neurology	123	Simple mode	-0.170253	0.115711911605081	0.843451668353113	0.67230173802824	1.05817176515728	0.143771325021844
NCAM2_O15394_OID21095_v1_Neurology	123	Weighted mode	-0.126333	0.0538514644331179	0.881321234649738	0.793039724411633	0.979430279133624	0.0205914162016846
NCAN_O14594_OID21055_v1_Neurology	43	MR Egger	-0.481494	0.255317182069003	0.617859786795589	0.3745929136251	1.01910821655627	0.0664112907937889
NCAN_O14594_OID21055_v1_Neurology	43	Weighted median	-0.310854	0.153175075144625	0.732820987981089	0.54276601011921	0.989425628011654	0.0424173473727548
NCAN_O14594_OID21055_v1_Neurology	43	Inverse variance weighted	-0.215547	0.102624315468678	0.806100122047221	0.65922460099897	0.985699571557038	0.0356977707317192
NCAN_O14594_OID21055_v1_Neurology	43	Simple mode	-0.437204	0.314681016454372	0.645839345399276	0.348548012342973	1.19670302309837	0.172046284622856
NCAN_O14594_OID21055_v1_Neurology	43	Weighted mode	-0.469019	0.212651265682485	0.625615388431423	0.412377547049673	0.949117179250923	0.0329394058900169
NCF2_P19878_OID20567_v1_Inflammation	15	MR Egger	0.356363636202607	0.220544401571709	1.42812677245014	0.926905749784684	2.20038129946075	0.13012724884943
NCF2_P19878_OID20567_v1_Inflammation	15	Weighted median	0.348770911803513	0.180387535996543	1.41732446084299	0.99522278859683	2.01845119537113	0.0531803567894117
NCF2_P19878_OID20567_v1_Inflammation	15	Inverse variance weighted	0.294591965160433	0.140651606663649	1.34257842813297	1.01909483444708	1.76874	0.036217250429566
NCF2_P19878_OID20567_v1_Inflammation	15	Simple mode	0.33855969116302	0.257688455865127	1.40292548870857	0.8466146196914	2.32478849418594	0.210024930476319
NCF2_P19878_OID20567_v1_Inflammation	15	Weighted mode	0.333567086056379	0.198033049509833	1.39593869142211	0.946884941578306	2.05795313099095	0.114257432960981
NCR1_O76036_OID20566_v1_Inflammation	79	MR Egger	0.0378969548555076	0.122572306498972	1.03862420218311	0.816813270044144	1.32066932911386	0.758019370701506
NCR1_O76036_OID20566_v1_Inflammation	79	Weighted median	0.169011247814506	0.0937156015380937	1.18413345776255	0.985435768375255	1.42289542433043	0.0713178286768396
NCR1_O76036_OID20566_v1_Inflammation	79	Inverse variance weighted	0.191318012284395	0.0659860340025746	1.21084445427129	1.06394679571223	1.37802406882393	0.00373911830516929
NCR1_O76036_OID20566_v1_Inflammation	79	Simple mode	0.456013645018763	0.195429824485476	1.57777187334641	1.07569954451796	2.31418159188548	0.0222051856760645
NCR1_O76036_OID20566_v1_Inflammation	79	Weighted mode	0.0927694432829398	0.0973888507325374	1.09720873725962	0.906546726415319	1.32797017300938	0.343751916067532
NCR3LG1_Q68D85_OID31490_v1_Oncology_II	122	MR Egger	0.21211208175354	0.0813226275526345	1.23628644246583	1.05413416337738	1.44991427175447	0.0102560133604517
NCR3LG1_Q68D85_OID31490_v1_Oncology_II	122	Weighted median	0.191578112072293	0.0783018459274344	1.21115943561854	1.03884185746937	1.41206013979955	0.0144186182761894
NCR3LG1_Q68D85_OID31490_v1_Oncology_II	122	Inverse variance weighted	0.14028051689726	0.0449705538748461	1.15059651535588	1.0535213620787	1.25662	0.00181228364369053
NCR3LG1_Q68D85_OID31490_v1_Oncology_II	122	Simple mode	-0.0640511	0.152572591925862	0.937957052882476	0.695521470819974	1.26489759117687	0.675370562796838
NCR3LG1_Q68D85_OID31490_v1_Oncology_II	122	Weighted mode	0.0648972012019855	0.0775334134900949	1.06704932735765	0.916614498589626	1.24217352962052	0.404230112983948
NECTIN1_Q15223_OID30545_v1_Inflammation_II	9	MR Egger	-0.563368	0.656426308042031	0.569288521968907	0.157242910504927	2.06107493307553	0.419176276583209
NECTIN1_Q15223_OID30545_v1_Inflammation_II	9	Weighted median	0.41091393515322	0.295215529026362	1.50819554835339	0.845600289776735	2.68998703001104	0.163949152502171
NECTIN1_Q15223_OID30545_v1_Inflammation_II	9	Inverse variance weighted	0.507209696871337	0.23910518272919	1.66065100449409	1.03931676311909	2.65343719700134	0.0338980160796796
NECTIN1_Q15223_OID30545_v1_Inflammation_II	9	Simple mode	1.06613937821972	0.553731286331692	2.90414602044183	0.981008707812919	8.59733867893097	0.0903634794232666
NECTIN1_Q15223_OID30545_v1_Inflammation_II	9	Weighted mode	0.0516592653080579	0.371553833632911	1.05301688199583	0.508349412169065	2.1812645539156	0.892858224232753
NME3_Q13232_OID20789_v1_Inflammation	57	MR Egger	-0.300285	0.165782778992262	0.740607043298132	0.535144033345426	1.02495544826294	0.0755538368416712
NME3_Q13232_OID20789_v1_Inflammation	57	Weighted median	-0.231662	0.11957569654309	0.79321453026427	0.627488503543136	1.0027104679522	0.0527009516370695
NME3_Q13232_OID20789_v1_Inflammation	57	Inverse variance weighted	-0.230789	0.0760442811258051	0.793907084680904	0.683973819688285	0.92150962648509	0.00240593866915019
NME3_Q13232_OID20789_v1_Inflammation	57	Simple mode	-0.210505	0.246629621825621	0.810175309391119	0.49962439035093	1.31375498198949	0.397004311155853
NME3_Q13232_OID20789_v1_Inflammation	57	Weighted mode	-0.199238	0.113885439371575	0.81935478329518	0.655436692584542	1.02426713137074	0.0856899429412065
NPDC1_Q9NQX5_OID20205_v1_Cardiometabolic	20	MR Egger	0.544121261291687	0.326007558964226	1.7230935678947	0.90950611799585	3.2644656093821	0.11240828724036
NPDC1_Q9NQX5_OID20205_v1_Cardiometabolic	20	Weighted median	0.407668795811227	0.183803944162406	1.5033091764111	1.04855504129154	2.15528836435536	0.0265579309367559
NPDC1_Q9NQX5_OID20205_v1_Cardiometabolic	20	Inverse variance weighted	0.359905039202352	0.136668307553259	1.4331933109182	1.09640336699636	1.87343739383781	0.00845297743880094
NPDC1_Q9NQX5_OID20205_v1_Cardiometabolic	20	Simple mode	0.453909491789457	0.306283362313791	1.57445548987709	0.863807014179463	2.86974989657714	0.154738340122516
NPDC1_Q9NQX5_OID20205_v1_Cardiometabolic	20	Weighted mode	0.401696945569237	0.226593002372988	1.49435839211481	0.958462022504301	2.32988574575884	0.0923003959105426
NPTX1_Q15818_OID21074_v1_Neurology	161	MR Egger	0.266515179050271	0.0514908593926465	1.30540740402956	1.18009281792277	1.44402920229172	6.76062004999894e-07
NPTX1_Q15818_OID21074_v1_Neurology	161	Weighted median	0.277550511132661	0.0561924426564292	1.31989278673967	1.18224281310543	1.47356951480325	7.84093849702294e-07
NPTX1_Q15818_OID21074_v1_Neurology	161	Inverse variance weighted	0.129686191924168	0.0339901838437137	1.13847106584843	1.06509652791121	1.2169003783309	0.000135961788843043
NPTX1_Q15818_OID21074_v1_Neurology	161	Simple mode	0.239420141919486	0.127898098802257	1.27051221990742	0.98880302627229	1.63248013815198	0.0630372403421301
NPTX1_Q15818_OID21074_v1_Neurology	161	Weighted mode	0.272955073910449	0.0520244615547601	1.31384121775062	1.18647547810974	1.45487941159182	4.85121383829273e-07
NSFL1C_Q9UNZ2_OID21022_v1_Neurology	8	MR Egger	-1.02863	1.18379014440712	0.357495877343662	0.0351243684395569	3.63859360311752	0.418282480336197
NSFL1C_Q9UNZ2_OID21022_v1_Neurology	8	Weighted median	-0.704987	0.329228535511305	0.494114766901738	0.259168876559524	0.942047541014381	0.03224730646358
NSFL1C_Q9UNZ2_OID21022_v1_Neurology	8	Inverse variance weighted	-0.71421	0.249967543283727	0.489578601521859	0.299947853945159	0.799096255950949	0.0042738033341331
NSFL1C_Q9UNZ2_OID21022_v1_Neurology	8	Simple mode	-0.400111	0.474469428893396	0.670245943862153	0.264458580821274	1.69868	0.426944719223652
NSFL1C_Q9UNZ2_OID21022_v1_Neurology	8	Weighted mode	-0.648489	0.446097277223927	0.52283501767084	0.218091630343697	1.2534018626578	0.189348130086806
NT5C_Q8TCD5_OID30294_v1_Cardiometabolic_II	35	MR Egger	-0.283775	0.107154613502851	0.752935835489695	0.610303863406554	0.928901824740567	0.0123129357299837
NT5C_Q8TCD5_OID30294_v1_Cardiometabolic_II	35	Weighted median	-0.214858	0.0878443407548045	0.806656249061754	0.679068976713619	0.958215330789279	0.0144494766183696
NT5C_Q8TCD5_OID30294_v1_Cardiometabolic_II	35	Inverse variance weighted	-0.189963	0.0722144100584002	0.826989382836019	0.717843524653423	0.952730526689216	0.00852475031852703
NT5C_Q8TCD5_OID30294_v1_Cardiometabolic_II	35	Simple mode	-0.30846	0.156264795493637	0.73457729433525	0.5407819917299	0.997821320985128	0.0565564631611942
NT5C_Q8TCD5_OID30294_v1_Cardiometabolic_II	35	Weighted mode	-0.198505	0.0784751955228003	0.819955709735362	0.703057684392701	0.956290473531166	0.0162247322685149
NUCB2_P80303_OID21448_v1_Oncology	55	MR Egger	0.108264305358573	0.116310466546026	1.1143422330909	0.887182818539687	1.39966485655569	0.356166474365577
NUCB2_P80303_OID21448_v1_Oncology	55	Weighted median	0.160747369470684	0.0936773394828955	1.17438824501074	0.977399099062702	1.41107941611775	0.0861677966974868
NUCB2_P80303_OID21448_v1_Oncology	55	Inverse variance weighted	0.221168414827484	0.0695847731221958	1.2475335160147	1.08848003471529	1.4298285902755	0.00148089030007647
NUCB2_P80303_OID21448_v1_Oncology	55	Simple mode	0.217053617811669	0.149709707547548	1.24241071569568	0.92646648379721	1.66609846494277	0.1528894076099
NUCB2_P80303_OID21448_v1_Oncology	55	Weighted mode	0.148305118202154	0.0843036262676373	1.15986673883243	0.983212517639256	1.36826050087309	0.0842120646922948
OGN_P20774_OID21123_v1_Neurology	87	MR Egger	-0.189262	0.07405553462623	0.827569350705645	0.715759390267279	0.956845330344346	0.0123770367902938
OGN_P20774_OID21123_v1_Neurology	87	Weighted median	-0.183671	0.0625762574384598	0.832209404088288	0.736150537292902	0.940802807534215	0.00333378236968186
OGN_P20774_OID21123_v1_Neurology	87	Inverse variance weighted	-0.147658	0.0452420715597307	0.862725725670587	0.789517788926109	0.94272185905554	0.00109951202909239
OGN_P20774_OID21123_v1_Neurology	87	Simple mode	-0.207096	0.103022771246157	0.81294150835052	0.66430044853394	0.994841863282972	0.0475441020748837
OGN_P20774_OID21123_v1_Neurology	87	Weighted mode	-0.184905	0.0578671505961395	0.831182959204382	0.742060163651057	0.931009567031039	0.00195344035772222
OMP_P47874_OID30835_v1_Neurology_II	9	MR Egger	0.273371617328933	0.18526467348421	1.31438860365989	0.9141623086624	1.88983661332399	0.183565343731841
OMP_P47874_OID30835_v1_Neurology_II	9	Weighted median	0.301175199027333	0.144202835567735	1.35144609283907	1.01871053005141	1.79286115925179	0.0367480208743952
OMP_P47874_OID30835_v1_Neurology_II	9	Inverse variance weighted	0.353090143770407	0.128210473676396	1.42345945365251	1.10715937700527	1.83012207481223	0.00588738737365631
OMP_P47874_OID30835_v1_Neurology_II	9	Simple mode	0.464968442740997	0.340234934172321	1.59196395007571	0.817183155885325	3.10132336929409	0.208917623557865
OMP_P47874_OID30835_v1_Neurology_II	9	Weighted mode	0.300621686935062	0.140357322956799	1.35069825807152	1.02584979145463	1.77841414947359	0.0645919343830879
OPLAH_O14841_OID30201_v1_Cardiometabolic_II	24	MR Egger	0.316165724188751	0.261150007992557	1.37185758677404	0.822268502836435	2.28878186613923	0.238869415595761
OPLAH_O14841_OID30201_v1_Cardiometabolic_II	24	Weighted median	0.305208497128427	0.167455174923056	1.35690788491271	0.977258920953644	1.88404	0.0683597459268692
OPLAH_O14841_OID30201_v1_Cardiometabolic_II	24	Inverse variance weighted	0.30004116111838	0.131475478008628	1.34991437041768	1.04325874636501	1.74670839215049	0.0224830002942061
OPLAH_O14841_OID30201_v1_Cardiometabolic_II	24	Simple mode	0.0638029690676194	0.298085550998621	1.0658823662743	0.594256216988164	1.91181040476541	0.832400138766953
OPLAH_O14841_OID30201_v1_Cardiometabolic_II	24	Weighted mode	0.303307703054661	0.168375424823856	1.35433113216042	0.973645378322693	1.88386126651035	0.0847693088092994
PAGR1_Q9BTK6_OID30206_v1_Cardiometabolic_II	4	MR Egger	0.0401677918167203	1.05926466483866	1.04098542837541	0.130551048656218	8.3005894877454	0.973195827392616
PAGR1_Q9BTK6_OID30206_v1_Cardiometabolic_II	4	Weighted median	0.778161067886149	0.40677602337403	2.17746437234486	0.981061688681036	4.83287763403095	0.0557485134589778
PAGR1_Q9BTK6_OID30206_v1_Cardiometabolic_II	4	Inverse variance weighted	1.1721379574764	0.342598451394758	3.22888849067161	1.64978502697508	6.31944205743421	0.000623186140196749
PAGR1_Q9BTK6_OID30206_v1_Cardiometabolic_II	4	Simple mode	0.850801379871507	0.659301669611535	2.34152254929223	0.643116176274091	8.5252525921651	0.287352636474667
PAGR1_Q9BTK6_OID30206_v1_Cardiometabolic_II	4	Weighted mode	0.781549276162611	0.426847393671524	2.18485458787772	0.946417367436335	5.04385246342325	0.16450892761583
PALM2_Q8IXS6_OID31096_v1_Neurology_II	26	MR Egger	0.29765582134782	0.211337891334317	1.34669820333366	0.889970960297551	2.0378148633701	0.171825649837312
PALM2_Q8IXS6_OID31096_v1_Neurology_II	26	Weighted median	0.218373455646349	0.153403090937222	1.24405157896298	0.920998747566315	1.68041958277349	0.154583414734029
PALM2_Q8IXS6_OID31096_v1_Neurology_II	26	Inverse variance weighted	0.204126144465149	0.103466644197095	1.22645285393799	1.00133240870763	1.50218507845364	0.0485104787559482
PALM2_Q8IXS6_OID31096_v1_Neurology_II	26	Simple mode	0.21002749750508	0.248128776251882	1.23371198349187	0.758581600970873	2.00643576941946	0.405334035032876
PALM2_Q8IXS6_OID31096_v1_Neurology_II	26	Weighted mode	0.194289596705096	0.154271973513125	1.21444793215521	0.89755267334268	1.6432281065169	0.219518896025826
PAMR1_Q6UXH9_OID21153_v1_Neurology	157	MR Egger	0.0257671601049679	0.0836183279465246	1.02610200317381	0.87099001792635	1.20883741403147	0.758380352790819
PAMR1_Q6UXH9_OID21153_v1_Neurology	157	Weighted median	0.0758900068583785	0.063381060936671	1.07884390220073	0.952812756518185	1.22154553174634	0.231165900223192
PAMR1_Q6UXH9_OID21153_v1_Neurology	157	Inverse variance weighted	0.131943324747556	0.0450313690043816	1.14104364849781	1.04464993775228	1.24633196320156	0.00338927763892414
PAMR1_Q6UXH9_OID21153_v1_Neurology	157	Simple mode	0.0617777616367299	0.138067725532662	1.06372591775051	0.811529142803074	1.39429722041261	0.655174212453794
PAMR1_Q6UXH9_OID21153_v1_Neurology	157	Weighted mode	0.077927634210845	0.0677417594232212	1.08104442520646	0.946630715066407	1.23454376735281	0.2517546117209
PARP1_P09874_OID20500_v1_Inflammation	9	MR Egger	0.0357052278349187	0.325291964009968	1.03635031423602	0.547787948822095	1.96065279662791	0.915677332983188
PARP1_P09874_OID20500_v1_Inflammation	9	Weighted median	0.340671931258563	0.199471939938582	1.40589193599841	0.950950687568868	2.07848015837543	0.0876606629731452
PARP1_P09874_OID20500_v1_Inflammation	9	Inverse variance weighted	0.463133018972993	0.161456846803339	1.58904470145261	1.15798056902452	2.18057464067963	0.00412471214605394
PARP1_P09874_OID20500_v1_Inflammation	9	Simple mode	0.285010273671331	0.273741365541695	1.32977568972968	0.777615725599204	2.27400671923583	0.328238441319628
PARP1_P09874_OID20500_v1_Inflammation	9	Weighted mode	0.338366419896864	0.19257430454203	1.40265436972364	0.96167452515271	2.04584735214068	0.116967563757235
PCDHB15_Q9Y5E8_OID31377_v1_Oncology_II	85	MR Egger	-0.131605	0.060767055433573	0.87668707856202	0.778249129755067	0.987576091423963	0.033201084284597
PCDHB15_Q9Y5E8_OID31377_v1_Oncology_II	85	Weighted median	-0.140726	0.0667552782286473	0.868727092401081	0.762184523155836	0.990162799353161	0.0350230544329195
PCDHB15_Q9Y5E8_OID31377_v1_Oncology_II	85	Inverse variance weighted	-0.138503	0.0417579866317078	0.870660315070652	0.802238746772588	0.944917441707428	0.000910510084298998
PCDHB15_Q9Y5E8_OID31377_v1_Oncology_II	85	Simple mode	0.00521439063243179	0.114663248924074	1.00522800922787	0.80289962145903	1.25854256687775	0.963836086706508
PCDHB15_Q9Y5E8_OID31377_v1_Oncology_II	85	Weighted mode	-0.121054	0.0660021862042492	0.885986042112087	0.778475026449705	1.00834482821801	0.0701813391878205
PDIA5_Q14554_OID31209_v1_Oncology_II	81	MR Egger	0.0123519594853772	0.131774874377551	1.01242856000086	0.781979468188744	1.3107909232957	0.925556741446097
PDIA5_Q14554_OID31209_v1_Oncology_II	81	Weighted median	-0.035004	0.0888451920470093	0.965601510530947	0.81128114423873	1.14927640530159	0.693589023517515
PDIA5_Q14554_OID31209_v1_Oncology_II	81	Inverse variance weighted	-0.132765	0.0559545984812741	0.875670921281835	0.784714020803011	0.977170717038927	0.017657366896675
PDIA5_Q14554_OID31209_v1_Oncology_II	81	Simple mode	-0.0384331	0.17737837503838	0.962296127659688	0.679706177739513	1.36237372505346	0.829015012215653
PDIA5_Q14554_OID31209_v1_Oncology_II	81	Weighted mode	-0.0106082	0.102305212760222	0.98944787345847	0.809671708179344	1.20914079669761	0.917673570403707
PDLIM7_Q9NR12_OID20729_v1_Inflammation	6	MR Egger	-0.86108	0.951653619293116	0.422705216043747	0.0654596520439354	2.72961578761012	0.41672838806235
PDLIM7_Q9NR12_OID20729_v1_Inflammation	6	Weighted median	-0.684004	0.358420832471976	0.504592580065586	0.249946401247697	1.0186730858546	0.0563418319094998
PDLIM7_Q9NR12_OID20729_v1_Inflammation	6	Inverse variance weighted	-0.666372	0.299942326066124	0.513568684862938	0.285287321939923	0.924516351719934	0.026305923682714
PDLIM7_Q9NR12_OID20729_v1_Inflammation	6	Simple mode	-0.425074	0.643482257922082	0.653721221053478	0.185203601311555	2.30746827723262	0.538093930112927
PDLIM7_Q9NR12_OID20729_v1_Inflammation	6	Weighted mode	-0.909921	0.452337617364032	0.402555884173246	0.165877937208044	0.976930643158766	0.100441288112191
PDZD2_O15018_OID30151_v1_Cardiometabolic_II	12	MR Egger	0.253789518139592	0.198536389584472	1.28890048554289	0.873417321863907	1.90202829740942	0.230014986894674
PDZD2_O15018_OID30151_v1_Cardiometabolic_II	12	Weighted median	0.282824148064132	0.152879953018413	1.32687180832378	0.983320115912182	1.79045335006821	0.064317099198142
PDZD2_O15018_OID30151_v1_Cardiometabolic_II	12	Inverse variance weighted	0.401639774758707	0.127451964972148	1.49427296087642	1.16396691272739	1.91831198738666	0.00162543705067479
PDZD2_O15018_OID30151_v1_Cardiometabolic_II	12	Simple mode	0.354747491177673	0.341427993265976	1.42582057654736	0.73018936408427	2.78416040619187	0.321099341143961
PDZD2_O15018_OID30151_v1_Cardiometabolic_II	12	Weighted mode	0.284128892454134	0.162852814182345	1.32860416676867	0.965544948711488	1.82817903434812	0.10887378506955
PECR_Q9BY49_OID30228_v1_Cardiometabolic_II	19	MR Egger	0.37818411627574	0.18487593329253	1.45963166008264	1.01595320194977	2.09707	0.0565893904841997
PECR_Q9BY49_OID30228_v1_Cardiometabolic_II	19	Weighted median	0.226516050377091	0.136909775551657	1.25422274042029	0.959035574184162	1.64026729031984	0.0980277031051362
PECR_Q9BY49_OID30228_v1_Cardiometabolic_II	19	Inverse variance weighted	0.296852906558805	0.114612296158248	1.34561735340313	1.0748840615996	1.68454080441481	0.00959587606379135
PECR_Q9BY49_OID30228_v1_Cardiometabolic_II	19	Simple mode	0.529137124694388	0.268525972447666	1.69746697417491	1.00283021621809	2.87326217520741	0.0643574179217113
PECR_Q9BY49_OID30228_v1_Cardiometabolic_II	19	Weighted mode	0.242687302211487	0.12784049381603	1.27466997531104	0.992150900657258	1.63763752558518	0.0738019928153283
PENK_P01210_OID30666_v1_Inflammation_II	53	MR Egger	-0.222924	0.123318858498107	0.800175699544058	0.628368240804452	1.01895848415432	0.0765517863203045
PENK_P01210_OID30666_v1_Inflammation_II	53	Weighted median	-0.203408	0.101319137063737	0.815945101135917	0.668984951621687	0.995188914868439	0.044685914569811
PENK_P01210_OID30666_v1_Inflammation_II	53	Inverse variance weighted	-0.162431	0.0612590473186041	0.850075078598299	0.753897894649948	0.958521895845639	0.00801264298597001
PENK_P01210_OID30666_v1_Inflammation_II	53	Simple mode	-0.122005	0.182614743425904	0.885144099205478	0.618826881194504	1.26607311376963	0.507024802558273
PENK_P01210_OID30666_v1_Inflammation_II	53	Weighted mode	-0.205358	0.102107672426317	0.814355797477199	0.666650773063776	0.994786763445755	0.0495023116009773
PGLYRP1_O75594_OID20338_v1_Cardiometabolic	76	MR Egger	0.108910071851479	0.167592337379491	1.11506207036505	0.802863225115058	1.54866156758967	0.51780066047901
PGLYRP1_O75594_OID20338_v1_Cardiometabolic	76	Weighted median	0.148483953511408	0.12358232789861	1.16007418250794	0.9105218255335	1.47802289981674	0.229557976097577
PGLYRP1_O75594_OID20338_v1_Cardiometabolic	76	Inverse variance weighted	0.275079144460309	0.078236405652183	1.31663487510075	1.12945564817997	1.53483441082879	0.000438102203552865
PGLYRP1_O75594_OID20338_v1_Cardiometabolic	76	Simple mode	0.148573710464513	0.222798132315844	1.16017831190503	0.74967865154582	1.79545424248025	0.506912134672315
PGLYRP1_O75594_OID20338_v1_Cardiometabolic	76	Weighted mode	0.148573710464513	0.12029505785669	1.16017831190503	0.91648955999513	1.46866235489029	0.220656889041492
PGLYRP2_Q96PD5_OID30742_v1_Inflammation_II	119	MR Egger	0.0893964696332853	0.0328874726759223	1.09351411553432	1.02525055148053	1.1663228263043	0.00756119348957981
PGLYRP2_Q96PD5_OID30742_v1_Inflammation_II	119	Weighted median	0.0732524272940272	0.038267020682937	1.07600211493865	0.998250598744817	1.15980952358879	0.0555889441876708
PGLYRP2_Q96PD5_OID30742_v1_Inflammation_II	119	Inverse variance weighted	0.0941932368015655	0.0235517006612044	1.09877204860049	1.0492041280803	1.15068	6.34968345461692e-05
PGLYRP2_Q96PD5_OID30742_v1_Inflammation_II	119	Simple mode	0.140358955594792	0.0700105610099466	1.15068677018762	1.00314318549601	1.31993125431053	0.0472708275397948
PGLYRP2_Q96PD5_OID30742_v1_Inflammation_II	119	Weighted mode	0.09113832710762	0.0294920955189592	1.09542052113116	1.03389561656273	1.1606066404504	0.00249483142172059
PGR_P06401_OID30460_v1_Inflammation_II	16	MR Egger	-0.26697	0.335310547898428	0.765696084622711	0.396857256558654	1.4773334349246	0.439216143743216
PGR_P06401_OID30460_v1_Inflammation_II	16	Weighted median	-0.187406	0.192435911068583	0.829107194626636	0.568598787636663	1.20896976062656	0.330125566843246
PGR_P06401_OID30460_v1_Inflammation_II	16	Inverse variance weighted	-0.368158	0.142627365619389	0.692007570543421	0.523243667514744	0.91520357993805	0.00984402727397511
PGR_P06401_OID30460_v1_Inflammation_II	16	Simple mode	-0.458248	0.322755601253589	0.632390369274109	0.33593103902807	1.19047522464046	0.176114797717534
PGR_P06401_OID30460_v1_Inflammation_II	16	Weighted mode	-0.227395	0.222557372672035	0.796605762900275	0.514989985403186	1.2322195760547	0.323101751077614
PI16_Q6UXB8_OID30676_v1_Inflammation_II	76	MR Egger	-0.165683	0.0933322752914379	0.847314649661147	0.705665164186112	1.01739770073309	0.0799773736833907
PI16_Q6UXB8_OID30676_v1_Inflammation_II	76	Weighted median	-0.119932	0.0801400706181215	0.886980921800546	0.758049688031276	1.03784114426769	0.134516292450283
PI16_Q6UXB8_OID30676_v1_Inflammation_II	76	Inverse variance weighted	-0.111142	0.0556740060702428	0.894811880659999	0.802307904553684	0.997981320171211	0.0459017593351358
PI16_Q6UXB8_OID30676_v1_Inflammation_II	76	Simple mode	-0.120534	0.1480060003981	0.886447256737755	0.663235325013575	1.18478119204795	0.418003586264258
PI16_Q6UXB8_OID30676_v1_Inflammation_II	76	Weighted mode	-0.120534	0.0790063280213914	0.886447256737755	0.759278943792473	1.0349144348097	0.131310637105581
PILRA_Q9UKJ1_OID21129_v1_Neurology	148	MR Egger	0.0349060979507903	0.0378108766359274	1.03552246655246	0.961555281779477	1.11517954199207	0.357438592547332
PILRA_Q9UKJ1_OID21129_v1_Neurology	148	Weighted median	0.0855453778672018	0.0364897144503234	1.08931099083204	1.01412435685377	1.17007192138526	0.0190592730767321
PILRA_Q9UKJ1_OID21129_v1_Neurology	148	Inverse variance weighted	0.0659261665559689	0.0235854151889031	1.06814784922004	1.01989	1.11868465540687	0.00518661604451408
PILRA_Q9UKJ1_OID21129_v1_Neurology	148	Simple mode	0.0345154980992133	0.0603169844905177	1.03511807061436	0.919701800380072	1.16501829143925	0.568036778150663
PILRA_Q9UKJ1_OID21129_v1_Neurology	148	Weighted mode	0.0643629599762492	0.0362345432070261	1.06647941786521	0.993365362334693	1.1449748419423	0.0777541925664226
PILRB_Q9UKJ0_OID20197_v1_Cardiometabolic	170	MR Egger	0.0272551855751793	0.0319764019161005	1.02763000566093	0.965201334921635	1.09409652714626	0.395231598297445
PILRB_Q9UKJ0_OID20197_v1_Cardiometabolic	170	Weighted median	0.0490896976524736	0.0293816726182504	1.05031455726506	0.991537628479076	1.11257569810541	0.094769265067761
PILRB_Q9UKJ0_OID20197_v1_Cardiometabolic	170	Inverse variance weighted	0.0444986099818987	0.020253171492213	1.04550352344062	1.00481394383232	1.08784081295469	0.0280120116495148
PILRB_Q9UKJ0_OID20197_v1_Cardiometabolic	170	Simple mode	0.040262629155067	0.0494347118964846	1.04108415734422	0.944944194981192	1.14700553580807	0.416527266385146
PILRB_Q9UKJ0_OID20197_v1_Cardiometabolic	170	Weighted mode	0.040262629155067	0.0290058390302399	1.04108415734422	0.983548021355306	1.10198607402982	0.166937697702991
PKD1_P98161_OID30328_v1_Cardiometabolic_II	61	MR Egger	-0.296059	0.105599691084585	0.743743635656575	0.604693068918658	0.914769201123537	0.00682953896576801
PKD1_P98161_OID30328_v1_Cardiometabolic_II	61	Weighted median	-0.135989	0.111829181069069	0.872851956406358	0.701051090208037	1.08675465803259	0.223967775784113
PKD1_P98161_OID30328_v1_Cardiometabolic_II	61	Inverse variance weighted	-0.161238	0.0676922099129899	0.851089320657378	0.745339896524248	0.971842558160271	0.0172221081671982
PKD1_P98161_OID30328_v1_Cardiometabolic_II	61	Simple mode	-0.288656	0.230559616675769	0.74926964279618	0.476850046614575	1.17731979183318	0.215435294273426
PKD1_P98161_OID30328_v1_Cardiometabolic_II	61	Weighted mode	-0.119209	0.11497495893445	0.887621827897067	0.708531744455992	1.11197912517562	0.303975705576401
PKN3_Q6P5Z2_OID31311_v1_Oncology_II	7	MR Egger	0.0263810777073388	0.387503019167187	1.02673213866123	0.480405452050165	2.19435245803535	0.948360862548925
PKN3_Q6P5Z2_OID31311_v1_Oncology_II	7	Weighted median	-0.490659	0.234758366573564	0.612223056867347	0.386437554994324	0.969929207231174	0.0366125942120076
PKN3_Q6P5Z2_OID31311_v1_Oncology_II	7	Inverse variance weighted	-0.511181	0.186426107519407	0.599786660448724	0.416205386233559	0.864342581694408	0.0061065477913792
PKN3_Q6P5Z2_OID31311_v1_Oncology_II	7	Simple mode	-0.500126	0.344847058223507	0.606454137563936	0.308502168720999	1.19216867256785	0.197166297782536
PKN3_Q6P5Z2_OID31311_v1_Oncology_II	7	Weighted mode	-0.36834	0.239912463996601	0.691882081452382	0.43232910231971	1.10726021465212	0.175611224166796
PLAT_P00750_OID20247_v1_Cardiometabolic	8	MR Egger	1.55987830663614	0.677540922953687	4.75824216340846	1.26099122430801	17.9548184390122	0.0609111153507711
PLAT_P00750_OID20247_v1_Cardiometabolic	8	Weighted median	0.784343051279088	0.358637673215007	2.19096711479547	1.08481906398024	4.42501155953379	0.0287420232701636
PLAT_P00750_OID20247_v1_Cardiometabolic	8	Inverse variance weighted	0.539340649169365	0.264214992939413	1.71487578456436	1.02171160289248	2.8783063128184	0.0412215494218204
PLAT_P00750_OID20247_v1_Cardiometabolic	8	Simple mode	1.00225605766941	0.568514311781776	2.72442135198124	0.894015654421916	8.30239567553294	0.1212807309565
PLAT_P00750_OID20247_v1_Cardiometabolic	8	Weighted mode	0.944101178233768	0.563964155471636	2.57050191687486	0.851063473281336	7.76379237518176	0.138034789441844
PPCDC_Q96CD2_OID21027_v1_Neurology	35	MR Egger	0.141095227803954	0.0865454634614336	1.15153430084631	0.971869366090079	1.36441305003814	0.112547128705826
PPCDC_Q96CD2_OID21027_v1_Neurology	35	Weighted median	0.0850317767033846	0.0784144314414792	1.08875166308737	0.933643589950021	1.26962815000848	0.278192190408698
PPCDC_Q96CD2_OID21027_v1_Neurology	35	Inverse variance weighted	0.145644311455005	0.0626234954050435	1.15678465981467	1.02316653083497	1.30785234744781	0.0200338374509141
PPCDC_Q96CD2_OID21027_v1_Neurology	35	Simple mode	0.141416109477381	0.15868441104008	1.15190386639001	0.843997846304651	1.5721396958699	0.379096951720025
PPCDC_Q96CD2_OID21027_v1_Neurology	35	Weighted mode	0.0937576699994511	0.0703622778080753	1.09829356418655	0.956808134060612	1.26070077186153	0.191558396903059
PPP1R9B_Q96SB3_OID20643_v1_Inflammation	3	MR Egger	-1.75191	3.37389966277825	0.173443146521931	0.00023293554860477	129.145273255265	0.695103299244183
PPP1R9B_Q96SB3_OID20643_v1_Inflammation	3	Weighted median	-1.30957	0.50008916900618	0.269936985133908	0.101292641922301	0.719360997604123	0.00882742106549392
PPP1R9B_Q96SB3_OID20643_v1_Inflammation	3	Inverse variance weighted	-1.20121	0.411593453964058	0.30082995570116	0.134265878784642	0.674025769364072	0.00351789473159577
PPP1R9B_Q96SB3_OID20643_v1_Inflammation	3	Simple mode	-1.43359	0.60207065457794	0.238451869205601	0.0732669045948947	0.77605699656659	0.140214699674577
PPP1R9B_Q96SB3_OID20643_v1_Inflammation	3	Weighted mode	-1.39592	0.607626145097673	0.247604880154712	0.0752553506480041	0.814668673370338	0.14841924544742
PPY_P01298_OID21516_v1_Oncology	37	MR Egger	-0.36632	0.190338994941214	0.69328114114339	0.477407858072129	1.00676755218483	0.0624435932239791
PPY_P01298_OID21516_v1_Oncology	37	Weighted median	-0.261227	0.149289322547816	0.770106216750763	0.574742076165753	1.03187779296523	0.0801523991605393
PPY_P01298_OID21516_v1_Oncology	37	Inverse variance weighted	-0.235929	0.0947596607417283	0.789837080466844	0.655958655550426	0.951039533363442	0.0127830258777289
PPY_P01298_OID21516_v1_Oncology	37	Simple mode	-0.267684	0.274461569227964	0.765149425679957	0.446806880575015	1.31030579221368	0.335916763394345
PPY_P01298_OID21516_v1_Oncology	37	Weighted mode	-0.244775	0.158628275988087	0.782880765625912	0.573678413771323	1.06837259076533	0.131559063444081
PRND_Q9UKY0_OID31124_v1_Neurology_II	90	MR Egger	-0.223593	0.121175912338278	0.799640425023923	0.63059093368462	1.01400888464445	0.0683726580757163
PRND_Q9UKY0_OID31124_v1_Neurology_II	90	Weighted median	0.0600092521535029	0.0962734331376282	1.06184637086553	0.879249411634054	1.28236391222014	0.533073603662546
PRND_Q9UKY0_OID31124_v1_Neurology_II	90	Inverse variance weighted	0.232766882258822	0.0774513361648312	1.26208723010698	1.08432997684178	1.46898472828215	0.00265292193853589
PRND_Q9UKY0_OID31124_v1_Neurology_II	90	Simple mode	0.11331138858487	0.187927706392563	1.11998062783875	0.774895640632287	1.61874262927917	0.548074023857895
PRND_Q9UKY0_OID31124_v1_Neurology_II	90	Weighted mode	-0.00618302	0.083031656552376	0.993836058863462	0.844572190305745	1.1694797949003	0.940806891108065
PRSS53_Q2L4Q9_OID31093_v1_Neurology_II	178	MR Egger	0.0416669477253819	0.0362709187409303	1.04254719820693	0.971004619722125	1.11936095710868	0.252209627731331
PRSS53_Q2L4Q9_OID31093_v1_Neurology_II	178	Weighted median	0.0231463561304185	0.0430159313934238	1.02341631183811	0.940668139598299	1.11344362931607	0.590516302401899
PRSS53_Q2L4Q9_OID31093_v1_Neurology_II	178	Inverse variance weighted	0.0651567742639034	0.025355690149332	1.0673263405698	1.01557973971619	1.12170957407291	0.0101783637335777
PRSS53_Q2L4Q9_OID31093_v1_Neurology_II	178	Simple mode	0.163781840521931	0.0838360734396521	1.17795730450835	0.999463280665593	1.38832855402204	0.0523251830120807
PRSS53_Q2L4Q9_OID31093_v1_Neurology_II	178	Weighted mode	0.0334475875379203	0.0428533669646027	1.0340132471259	0.950711134572765	1.12461436113538	0.436131851938239
PSAPL1_Q6NUJ1_OID31473_v1_Oncology_II	157	MR Egger	0.0209580673941857	0.054762226585937	1.02117923003361	0.917249375382769	1.13688496044695	0.702458884892609
PSAPL1_Q6NUJ1_OID31473_v1_Oncology_II	157	Weighted median	0.0360951330780515	0.0611153069133644	1.03675447144365	0.919715525220092	1.16868727838555	0.554783718653374
PSAPL1_Q6NUJ1_OID31473_v1_Oncology_II	157	Inverse variance weighted	0.0899940518672667	0.038728139198641	1.09416777543069	1.01419	1.18045647240682	0.0201395361385953
PSAPL1_Q6NUJ1_OID31473_v1_Oncology_II	157	Simple mode	0.160596734357821	0.112033073263288	1.17421135422823	0.942717997579721	1.46255010293457	0.153723018475539
PSAPL1_Q6NUJ1_OID31473_v1_Oncology_II	157	Weighted mode	0.0564757645740008	0.0462592635976752	1.0581009709617	0.966385561825268	1.15852068674897	0.223983689210807
PSG1_P11464_OID20916_v1_Neurology	155	MR Egger	0.0678720338086091	0.032638778486765	1.07022834667028	1.00390764298001	1.14093036548324	0.0392406425107303
PSG1_P11464_OID20916_v1_Neurology	155	Weighted median	0.0660507442998275	0.0379561161442837	1.06828092495817	0.991691464918207	1.15078547612952	0.0818261671506355
PSG1_P11464_OID20916_v1_Neurology	155	Inverse variance weighted	0.0677669258329821	0.0228798127153948	1.07011586304687	1.02318723220975	1.11919688234518	0.00305781417433073
PSG1_P11464_OID20916_v1_Neurology	155	Simple mode	0.0727216930845715	0.0582060102845998	1.07543119532349	0.95948165113991	1.20539278109266	0.213420025230467
PSG1_P11464_OID20916_v1_Neurology	155	Weighted mode	0.0727216930845715	0.0312928956924859	1.07543119532349	1.01145270326631	1.14345658688738	0.0214379015950062
PTPRC_P08575_OID30380_v1_Cardiometabolic_II	49	MR Egger	0.165085772880269	0.119077586195598	1.17949428299467	0.933974357092658	1.48955563185669	0.172175323347798
PTPRC_P08575_OID30380_v1_Cardiometabolic_II	49	Weighted median	0.1582863875775	0.0987318616043016	1.17150165018987	0.965385224269115	1.42162535938608	0.108891696860227
PTPRC_P08575_OID30380_v1_Cardiometabolic_II	49	Inverse variance weighted	0.278435634631951	0.0774858294499868	1.32106157204512	1.13492141302425	1.53773085705013	0.000326422403728349
PTPRC_P08575_OID30380_v1_Cardiometabolic_II	49	Simple mode	0.515941582174337	0.222927976288289	1.67521511211471	1.08220729667455	2.59316831486995	0.0249709974046451
PTPRC_P08575_OID30380_v1_Cardiometabolic_II	49	Weighted mode	0.227896197969648	0.0884882246188042	1.25595494799211	1.05596947405017	1.49381480255831	0.0131470854689051
PTPRN2_Q92932_OID20912_v1_Neurology	23	MR Egger	-0.692612	0.281672611382345	0.500267700572703	0.288030114234018	0.86889446578132	0.0227004617483717
PTPRN2_Q92932_OID20912_v1_Neurology	23	Weighted median	-0.36071	0.194146384288418	0.697181275555467	0.476524216513381	1.02001475295747	0.0631793720637353
PTPRN2_Q92932_OID20912_v1_Neurology	23	Inverse variance weighted	-0.406875	0.13627285249721	0.665727419036118	0.509681242261326	0.869549356947407	0.00282895319266052
PTPRN2_Q92932_OID20912_v1_Neurology	23	Simple mode	-0.0121186	0.388616294993959	0.987954549311172	0.461253948513083	2.11608853355313	0.975404032065106
PTPRN2_Q92932_OID20912_v1_Neurology	23	Weighted mode	-0.816373	0.263239078884781	0.442031798229632	0.263863843707281	0.740503541147841	0.00520971868256332
PVALB_P20472_OID21420_v1_Oncology	68	MR Egger	0.0658686550609141	0.0624942472782725	1.06808642020675	0.944953017548229	1.20726489025878	0.295728312606786
PVALB_P20472_OID21420_v1_Oncology	68	Weighted median	0.0764751012771111	0.0611923209062914	1.07947531244588	0.957469083042574	1.21702827884243	0.211390896749027
PVALB_P20472_OID21420_v1_Oncology	68	Inverse variance weighted	0.115251753627223	0.0404348465930527	1.12215590883422	1.03666	1.21470840602702	0.00436769559109979
PVALB_P20472_OID21420_v1_Oncology	68	Simple mode	0.0846083654597409	0.119073502358674	1.08829077097202	0.861762387247105	1.37436585735236	0.479825701503385
PVALB_P20472_OID21420_v1_Oncology	68	Weighted mode	0.0846083654597409	0.0523113640725759	1.08829077097202	0.982237734152172	1.20579444364881	0.110490981432435
PVR_P15151_OID21011_v1_Neurology	81	MR Egger	-0.0699874	0.0563290463216646	0.932405584326531	0.834942587957111	1.04124545354723	0.217737176454417
PVR_P15151_OID21011_v1_Neurology	81	Weighted median	-0.12757	0.060210381378927	0.880231998083429	0.782249043200019	0.9904881024595	0.0341129674512802
PVR_P15151_OID21011_v1_Neurology	81	Inverse variance weighted	-0.0773995	0.0382098907049365	0.925520019787576	0.858738435963458	0.997495012630418	0.0428016011307604
PVR_P15151_OID21011_v1_Neurology	81	Simple mode	0.0360565857279682	0.0992039284465462	1.03671450807634	0.853522722794314	1.25922478986534	0.717220542962865
PVR_P15151_OID21011_v1_Neurology	81	Weighted mode	-0.112412	0.0546807861349543	0.893675849182644	0.802850711965014	0.994775879886277	0.0430645079573271
PXN_P49023_OID20822_v1_Neurology	87	MR Egger	-0.111167	0.0594011965011252	0.894789345924619	0.796448108438827	1.00527324391493	0.064721313344757
PXN_P49023_OID20822_v1_Neurology	87	Weighted median	-0.10875	0.0578559158326749	0.896954489047268	0.800797037758592	1.00465825607184	0.0601527702364709
PXN_P49023_OID20822_v1_Neurology	87	Inverse variance weighted	-0.0764189	0.0377899914625571	0.926428017962992	0.860288645304406	0.99765221492973	0.0431556725115968
PXN_P49023_OID20822_v1_Neurology	87	Simple mode	-0.0861728	0.0979567290193906	0.917435666431436	0.757169599731659	1.11162440005355	0.381471836261509
PXN_P49023_OID20822_v1_Neurology	87	Weighted mode	-0.105791	0.0564334298885865	0.899612304607846	0.80541234434618	1.00482976736446	0.0642392859636853
QDPR_P09417_OID20174_v1_Cardiometabolic	35	MR Egger	0.223521855662334	0.111547284866851	1.2504729698928	1.00490114885311	1.55605618544384	0.0533540275179165
QDPR_P09417_OID20174_v1_Cardiometabolic	35	Weighted median	0.111034003843249	0.0987711120632894	1.11743290322173	0.920758607078792	1.35611688405937	0.260947429054775
QDPR_P09417_OID20174_v1_Cardiometabolic	35	Inverse variance weighted	0.136703917295808	0.067754156457411	1.14648864280431	1.00391340810158	1.30931233458161	0.0436281201221667
QDPR_P09417_OID20174_v1_Cardiometabolic	35	Simple mode	0.0654147573413582	0.216048324983438	1.06760172822494	0.699045140865898	1.6304718872619	0.76390354174876
QDPR_P09417_OID20174_v1_Cardiometabolic	35	Weighted mode	0.117864078169576	0.101647713709693	1.12509117652188	0.921856745905717	1.37313108691711	0.254316726744289
RASSF2_P50749_OID21194_v1_Oncology	8	MR Egger	-0.304522	0.878297768868691	0.73747580761769	0.131863811307234	4.12448693413071	0.74063922369714
RASSF2_P50749_OID21194_v1_Oncology	8	Weighted median	0.557662660282613	0.288883277721731	1.74658536230472	0.991487871025246	3.07675012167591	0.0535562745173951
RASSF2_P50749_OID21194_v1_Oncology	8	Inverse variance weighted	0.605821170392627	0.22436713408448	1.83275659657592	1.18064581261096	2.84505031603359	0.00693116986381792
RASSF2_P50749_OID21194_v1_Oncology	8	Simple mode	0.239711954210229	0.507407783071649	1.27088302508885	0.47010119421622	3.43573614219775	0.650997713206911
RASSF2_P50749_OID21194_v1_Oncology	8	Weighted mode	0.433988997735251	0.410543983427637	1.5434018871069	0.690266716945404	3.4509694972205	0.32557345088945
REG1B_P48304_OID20266_v1_Cardiometabolic	76	MR Egger	0.118710591564059	0.0843688403527544	1.12604398449828	0.95441915754956	1.3285305989459	0.1636008915517
REG1B_P48304_OID20266_v1_Cardiometabolic	76	Weighted median	0.127844876206091	0.0734989234340514	1.13637670995726	0.983917709755039	1.3124593796109	0.0819623983690267
REG1B_P48304_OID20266_v1_Cardiometabolic	76	Inverse variance weighted	0.113293780851978	0.0480396280335541	1.11996090769262	1.01932037877707	1.23053797498343	0.0183568666221638
REG1B_P48304_OID20266_v1_Cardiometabolic	76	Simple mode	0.175185309428214	0.137118993084552	1.19146698622233	0.910676164916768	1.55883467026665	0.205325740702243
REG1B_P48304_OID20266_v1_Cardiometabolic	76	Weighted mode	0.122491053124225	0.0731344462227574	1.1303090072945	0.979363447751866	1.30451923124536	0.0981238825473755
REG4_Q9BYZ8_OID20784_v1_Inflammation	27	MR Egger	-0.00968023	0.138473387172823	0.990366475090763	0.754961845817271	1.29917261437487	0.944824053995194
REG4_Q9BYZ8_OID20784_v1_Inflammation	27	Weighted median	-0.12971	0.131291306624267	0.878349835439242	0.679063062720935	1.13612192411825	0.323173135375538
REG4_Q9BYZ8_OID20784_v1_Inflammation	27	Inverse variance weighted	-0.265681	0.102777614965679	0.766683321550359	0.626801379563194	0.937782421527408	0.00973754044131148
REG4_Q9BYZ8_OID20784_v1_Inflammation	27	Simple mode	-0.168483	0.209138497128764	0.844945344576482	0.560797843278349	1.27306594324243	0.427776504814585
REG4_Q9BYZ8_OID20784_v1_Inflammation	27	Weighted mode	-0.11248	0.123406028772361	0.893615326105312	0.701625357071134	1.13814066581596	0.370425906591925
RETN_Q9HD89_OID20327_v1_Cardiometabolic	64	MR Egger	-0.00482032	0.125184327487666	0.995191277442533	0.778659362934505	1.27193703157334	0.969408133949879
RETN_Q9HD89_OID20327_v1_Cardiometabolic	64	Weighted median	-0.0593654	0.109182500226676	0.942362375988863	0.760816491898646	1.16722870381427	0.586629871685172
RETN_Q9HD89_OID20327_v1_Cardiometabolic	64	Inverse variance weighted	-0.152889	0.0701351870580379	0.85822471696736	0.747998525300913	0.984694006605691	0.0292631712820342
RETN_Q9HD89_OID20327_v1_Cardiometabolic	64	Simple mode	-0.0733573	0.219583785824707	0.929268710515201	0.604265531990352	1.42907429040049	0.739432906727109
RETN_Q9HD89_OID20327_v1_Cardiometabolic	64	Weighted mode	0.0201200553193592	0.114498239685157	1.02032382797696	0.815220626948688	1.27702940716083	0.861074612149921
RGMA_Q96B86_OID21065_v1_Neurology	100	MR Egger	-0.202212	0.0843995753600022	0.816921692491131	0.692369709294381	0.963879619087764	0.0184785283199322
RGMA_Q96B86_OID21065_v1_Neurology	100	Weighted median	-0.21552	0.0758561723590868	0.806121875869357	0.694753317706676	0.935342749999633	0.00449482406863083
RGMA_Q96B86_OID21065_v1_Neurology	100	Inverse variance weighted	-0.164841	0.0470678709240678	0.848028868039667	0.7732958080185	0.929984300408148	0.000461451364806414
RGMA_Q96B86_OID21065_v1_Neurology	100	Simple mode	-0.25525	0.142739913666137	0.774722853707635	0.585657487568837	1.02482340411699	0.0768001383339571
RGMA_Q96B86_OID21065_v1_Neurology	100	Weighted mode	-0.199023	0.0724487570688168	0.819530987108212	0.711042814881754	0.944571866522907	0.00714447914940395
RNF43_Q68DV7_OID31291_v1_Oncology_II	6	MR Egger	0.332630986013704	0.799543874369227	1.39463256458157	0.290987488450628	6.68413614807831	0.698742789605257
RNF43_Q68DV7_OID31291_v1_Oncology_II	6	Weighted median	-0.585167	0.275741262303601	0.55701305649964	0.324451416299925	0.956271199704864	0.0338244500021746
RNF43_Q68DV7_OID31291_v1_Oncology_II	6	Inverse variance weighted	-0.464946	0.220305039406466	0.628169245367035	0.407895800932499	0.967395594470192	0.0348184888871633
RNF43_Q68DV7_OID31291_v1_Oncology_II	6	Simple mode	-0.389973	0.34979769700823	0.677075248563155	0.341101105573157	1.34397363340863	0.315611421778732
RNF43_Q68DV7_OID31291_v1_Oncology_II	6	Weighted mode	-0.551273	0.285571763424329	0.576216030478705	0.329231775318591	1.0084838058518	0.111430688971117
RNF5_Q99942_OID30218_v1_Cardiometabolic_II	11	MR Egger	-0.516752	0.837852468785605	0.596454716774008	0.115447107916271	3.08156900231731	0.552674491669482
RNF5_Q99942_OID30218_v1_Cardiometabolic_II	11	Weighted median	-0.546187	0.268748962889608	0.579154035488488	0.342003343058907	0.980748883395648	0.0421201765594472
RNF5_Q99942_OID30218_v1_Cardiometabolic_II	11	Inverse variance weighted	-0.511531	0.235920121456314	0.59957701357619	0.377594546326337	0.952059818412339	0.0301406224685422
RNF5_Q99942_OID30218_v1_Cardiometabolic_II	11	Simple mode	-0.648779	0.44206109028405	0.522683404806498	0.219760034609553	1.24316480995056	0.172941433109587
RNF5_Q99942_OID30218_v1_Cardiometabolic_II	11	Weighted mode	-0.577604	0.338031408857217	0.561241342370858	0.289342020976372	1.08864880159237	0.118298436333657
RPL14_P50914_OID30284_v1_Cardiometabolic_II	3	MR Egger	-0.911881	1.48569255390757	0.4017675902263	0.0218437836956905	7.38961705558795	0.649549142055344
RPL14_P50914_OID30284_v1_Cardiometabolic_II	3	Weighted median	-1.21051	0.498012074175764	0.298045056774539	0.112296310464027	0.79103984361262	0.0150702995541517
RPL14_P50914_OID30284_v1_Cardiometabolic_II	3	Inverse variance weighted	-1.2403	0.422933234193856	0.289296289889932	0.12628007384245	0.662751777042005	0.00336111342191684
RPL14_P50914_OID30284_v1_Cardiometabolic_II	3	Simple mode	-1.31584	0.559130681383414	0.268249271240978	0.0896596225817317	0.802564961231249	0.142859901965039
RPL14_P50914_OID30284_v1_Cardiometabolic_II	3	Weighted mode	-1.18193	0.634918788173414	0.306687064567242	0.0883571451949862	1.06450876570658	0.203722910632401
RSPO3_Q9BXY4_OID21415_v1_Oncology	26	MR Egger	0.349433130143269	0.229537523986709	1.41826334993482	0.904420911514145	2.22404292532424	0.140993258854241
RSPO3_Q9BXY4_OID21415_v1_Oncology	26	Weighted median	0.309097889774846	0.172124450110887	1.36219570900833	0.972129714355472	1.90877526140733	0.0725292865115116
RSPO3_Q9BXY4_OID21415_v1_Oncology	26	Inverse variance weighted	0.24646597895098	0.119025392825805	1.27949565269281	1.01326339777264	1.61567972242805	0.0383867632279205
RSPO3_Q9BXY4_OID21415_v1_Oncology	26	Simple mode	0.378435572778478	0.280553072979118	1.45999874010556	0.842443694653622	2.53025375421233	0.189464217098329
RSPO3_Q9BXY4_OID21415_v1_Oncology	26	Weighted mode	0.339408650276574	0.17620240549328	1.40411702079729	0.994069590224198	1.98330642792121	0.0655169777484351
RTN4R_Q9BZR6_OID21424_v1_Oncology	65	MR Egger	0.189894204671776	0.0973414408940626	1.20912167146628	0.999105380929882	1.4632842984478	0.0555312793688623
RTN4R_Q9BZR6_OID21424_v1_Oncology	65	Weighted median	0.185661938257425	0.0796799893638606	1.20401516010588	1.02992827006637	1.40752763847464	0.0198011349917154
RTN4R_Q9BZR6_OID21424_v1_Oncology	65	Inverse variance weighted	0.166198324185967	0.0544378562280659	1.18080726114162	1.06130589468174	1.31376429260566	0.00226572191720452
RTN4R_Q9BZR6_OID21424_v1_Oncology	65	Simple mode	0.0401066441762405	0.133484905147757	1.04092177651879	0.801296875164263	1.35220562866781	0.764801468950307
RTN4R_Q9BZR6_OID21424_v1_Oncology	65	Weighted mode	0.153864402558048	0.0813389423372145	1.16633272432159	0.994455503351239	1.36791643189584	0.0630647834329638
RUVBL1_Q9Y265_OID21211_v1_Oncology	15	MR Egger	-0.386559	0.216508707876271	0.679390554775523	0.444450676987617	1.03852136990007	0.0975297291304337
RUVBL1_Q9Y265_OID21211_v1_Oncology	15	Weighted median	-0.292237	0.152744115561924	0.746591657796095	0.553432573513553	1.0071671422446	0.0557167196033387
RUVBL1_Q9Y265_OID21211_v1_Oncology	15	Inverse variance weighted	-0.309161	0.119084083081035	0.734062238863622	0.581254684528523	0.927041768209665	0.00942718627975385
RUVBL1_Q9Y265_OID21211_v1_Oncology	15	Simple mode	-0.360676	0.276379820260464	0.697204517921803	0.405602796107243	1.19844869038341	0.212934730278203
RUVBL1_Q9Y265_OID21211_v1_Oncology	15	Weighted mode	-0.274353	0.149901524253929	0.76006345128741	0.566566766143641	1.0196440816941	0.0885851882135061
S100A11_P31949_OID20130_v1_Cardiometabolic	16	MR Egger	0.356404834346287	0.183726957206252	1.4281856098341	0.996306834794237	2.04727506115969	0.0728142596618685
S100A11_P31949_OID20130_v1_Cardiometabolic	16	Weighted median	0.223606162542849	0.163974640546693	1.25057839781214	0.906844640523301	1.72460227384914	0.172673630541043
S100A11_P31949_OID20130_v1_Cardiometabolic	16	Inverse variance weighted	0.304764236059392	0.114346119939907	1.35630519745038	1.08398692482719	1.69703503473916	0.00769246260973405
S100A11_P31949_OID20130_v1_Cardiometabolic	16	Simple mode	0.0939638985693603	0.273048241175607	1.09852008705458	0.643257187513324	1.87599362290437	0.735525866331068
S100A11_P31949_OID20130_v1_Cardiometabolic	16	Weighted mode	0.200895897333863	0.172259862208361	1.22249749994968	0.872202695956005	1.71347800724822	0.261727005580051
S100A16_Q96FQ6_OID20878_v1_Neurology	5	MR Egger	-1.18725	0.830134556834331	0.305059675926559	0.0599459716977082	1.55242134276681	0.248026249081961
S100A16_Q96FQ6_OID20878_v1_Neurology	5	Weighted median	-0.877455	0.314403327419121	0.415839869822036	0.224543563718971	0.770108011423702	0.00525685400450959
S100A16_Q96FQ6_OID20878_v1_Neurology	5	Inverse variance weighted	-0.701734	0.256266464972357	0.49572500519553	0.29998698087156	0.819179819277971	0.00617580996223149
S100A16_Q96FQ6_OID20878_v1_Neurology	5	Simple mode	-0.807121	0.403823877263404	0.446140521726547	0.202176115021081	0.984494954340584	0.116289506966425
S100A16_Q96FQ6_OID20878_v1_Neurology	5	Weighted mode	-0.876107	0.335388820297417	0.416400963942186	0.215785867952515	0.803526961321384	0.0592820750807534
S100P_P25815_OID20103_v1_Cardiometabolic	22	MR Egger	0.580292794852212	0.20549951267461	1.78656145017341	1.19424447866306	2.6726536084294	0.0104891635027611
S100P_P25815_OID20103_v1_Cardiometabolic	22	Weighted median	0.380367049741292	0.140625644410835	1.46282141913005	1.11042273670062	1.92705573610977	0.00683414187687668
S100P_P25815_OID20103_v1_Cardiometabolic	22	Inverse variance weighted	0.429035060290867	0.106321367551345	1.53577487816739	1.24688093363556	1.8916036108861	5.45403396690373e-05
S100P_P25815_OID20103_v1_Cardiometabolic	22	Simple mode	0.518233751233176	0.226874029007039	1.67905939254876	1.07633381905184	2.61929932313168	0.0328682805816828
S100P_P25815_OID20103_v1_Cardiometabolic	22	Weighted mode	0.447592190740341	0.157021376203678	1.5645405314219	1.15007860634325	2.12836501867017	0.00957780377355871
SAMD9L_Q8IVG5_OID20536_v1_Inflammation	16	MR Egger	-0.264945	0.132346346299734	0.767248106082713	0.591943615523932	0.99446913667018	0.0650613691943046
SAMD9L_Q8IVG5_OID20536_v1_Inflammation	16	Weighted median	-0.212075	0.127801801286979	0.808903754621089	0.629665301736811	1.03916363572086	0.0970335960894147
SAMD9L_Q8IVG5_OID20536_v1_Inflammation	16	Inverse variance weighted	-0.286493	0.0994032602509809	0.750892235516279	0.617964959939849	0.912412816114229	0.00394996558503061
SAMD9L_Q8IVG5_OID20536_v1_Inflammation	16	Simple mode	-0.345492	0.220768605779361	0.7078719695152	0.459232572665936	1.09113062759561	0.138443396593315
SAMD9L_Q8IVG5_OID20536_v1_Inflammation	16	Weighted mode	-0.255604	0.123580337851411	0.774448245733521	0.607853180050626	0.986702225148802	0.0563050886937351
SCGN_O76038_OID20457_v1_Inflammation	22	MR Egger	-0.595401	0.373277725340587	0.551341450537986	0.265265170215941	1.1459378358413	0.126379708011885
SCGN_O76038_OID20457_v1_Inflammation	22	Weighted median	-0.19913	0.189183623469905	0.819443653907481	0.565565285988039	1.18728627545829	0.292536577808048
SCGN_O76038_OID20457_v1_Inflammation	22	Inverse variance weighted	-0.259314	0.130132409133416	0.771580590680504	0.59787494151239	0.995754407115486	0.0462948957410264
SCGN_O76038_OID20457_v1_Inflammation	22	Simple mode	-0.346011	0.296629344810156	0.707504935336134	0.395579227453589	1.26539312174504	0.256499109127635
SCGN_O76038_OID20457_v1_Inflammation	22	Weighted mode	-0.346011	0.229398948195851	0.707504935336134	0.451295649460248	1.10916919789425	0.146366954459835
SDCCAG8_Q86SQ7_OID31423_v1_Oncology_II	15	MR Egger	-0.926146	0.279765502516644	0.39607709624704	0.228896170055888	0.685363438510934	0.00563344870961785
SDCCAG8_Q86SQ7_OID31423_v1_Oncology_II	15	Weighted median	-0.867824	0.168667852525017	0.4198643577768	0.301672716791168	0.584362022546965	2.67288764965541e-07
SDCCAG8_Q86SQ7_OID31423_v1_Oncology_II	15	Inverse variance weighted	-0.727966	0.124454357704364	0.48289039983651	0.378364936875563	0.616291615655058	4.93772626699265e-09
SDCCAG8_Q86SQ7_OID31423_v1_Oncology_II	15	Simple mode	-0.822278	0.321325019311188	0.439429301675118	0.234083948554792	0.824909663233417	0.022716204598645
SDCCAG8_Q86SQ7_OID31423_v1_Oncology_II	15	Weighted mode	-0.888032	0.170637144393971	0.411464707787565	0.294498658715176	0.574886169238712	0.000133552977198403
SEMA3G_Q9NS98_OID30599_v1_Inflammation_II	140	MR Egger	0.152997756935357	0.0724654432550278	1.16532236504641	1.0110258294764	1.34316668762126	0.03654767204628
SEMA3G_Q9NS98_OID30599_v1_Inflammation_II	140	Weighted median	0.206091177431333	0.0589321586871339	1.22886524366386	1.09481362839626	1.37933046129242	0.000470359688027813
SEMA3G_Q9NS98_OID30599_v1_Inflammation_II	140	Inverse variance weighted	0.193983891215861	0.0442704886470447	1.21407672549881	1.11317215119915	1.32412789325541	1.17709373742163e-05
SEMA3G_Q9NS98_OID30599_v1_Inflammation_II	140	Simple mode	0.217443236478292	0.107510027061458	1.24289487641503	1.00674623746858	1.53443600415436	0.045038790822062
SEMA3G_Q9NS98_OID30599_v1_Inflammation_II	140	Weighted mode	0.201706919765764	0.0577679300908804	1.22348937500718	1.09251434330819	1.37016622246137	0.000643821578150899
SEPTIN8_Q92599_OID31079_v1_Neurology_II	9	MR Egger	-1.05357	0.390535265700314	0.348691214883863	0.162184996707515	0.749672076982879	0.030738721631413
SEPTIN8_Q92599_OID31079_v1_Neurology_II	9	Weighted median	-0.61823	0.235956416329235	0.538897645799011	0.339356467137551	0.855768788192872	0.0087903749941804
SEPTIN8_Q92599_OID31079_v1_Neurology_II	9	Inverse variance weighted	-0.444384	0.214877157390816	0.641219067314919	0.420822836302242	0.977042728719483	0.0386320765712903
SEPTIN8_Q92599_OID31079_v1_Neurology_II	9	Simple mode	-0.632453	0.367789513025998	0.531287175030155	0.258381002323754	1.09244123915055	0.123819806557407
SEPTIN8_Q92599_OID31079_v1_Neurology_II	9	Weighted mode	-0.674768	0.245831505409543	0.509274623474871	0.314554595530125	0.824532993003539	0.0252595926600362
SERPINB8_P50452_OID20630_v1_Inflammation	55	MR Egger	-0.0886554	0.061792509102009	0.915160925700048	0.810771778550338	1.03299046918685	0.157239832430332
SERPINB8_P50452_OID20630_v1_Inflammation	55	Weighted median	-0.0547897	0.0527507361438174	0.946684169473389	0.853695086405852	1.04980212607837	0.298965816961496
SERPINB8_P50452_OID20630_v1_Inflammation	55	Inverse variance weighted	-0.0872967	0.0402491673043569	0.916405130714463	0.846889462504989	0.991626889671975	0.0300896906106315
SERPINB8_P50452_OID20630_v1_Inflammation	55	Simple mode	-0.170486	0.107802146110346	0.843254915427639	0.682646459488684	1.04165024590545	0.119610500891572
SERPINB8_P50452_OID20630_v1_Inflammation	55	Weighted mode	-0.0708299	0.042299252895714	0.931620341533274	0.85749799182898	1.0121498464473	0.0998161719393595
SERPIND1_P05546_OID30767_v1_Inflammation_II	71	MR Egger	-0.232008	0.101500028104207	0.792939925552488	0.649892788006749	0.967473000375341	0.0253424739815966
SERPIND1_P05546_OID30767_v1_Inflammation_II	71	Weighted median	-0.208219	0.0914084725361687	0.812029191329215	0.678833363770234	0.971359751542743	0.0227327775350036
SERPIND1_P05546_OID30767_v1_Inflammation_II	71	Inverse variance weighted	-0.167141	0.0621712398725741	0.846080451651434	0.749014858758503	0.955724872872648	0.00717964911694706
SERPIND1_P05546_OID30767_v1_Inflammation_II	71	Simple mode	-0.195898	0.171856689891129	0.822095756681182	0.586995860824973	1.15135638640342	0.258215922640051
SERPIND1_P05546_OID30767_v1_Inflammation_II	71	Weighted mode	-0.183519	0.0916628185259691	0.83233643978688	0.695462860007249	0.996148017149151	0.0491493778839079
SERPINI1_Q99574_OID30604_v1_Inflammation_II	67	MR Egger	-0.114298	0.075805166805159	0.891991866599231	0.768836926183132	1.03487418850855	0.136453597439405
SERPINI1_Q99574_OID30604_v1_Inflammation_II	67	Weighted median	-0.147776	0.0697950604424938	0.86262451165027	0.752334607187734	0.989082571758104	0.0342359775303102
SERPINI1_Q99574_OID30604_v1_Inflammation_II	67	Inverse variance weighted	-0.105945	0.0496450829273596	0.899474424423395	0.816074995789087	0.991396923526004	0.0328393972805126
SERPINI1_Q99574_OID30604_v1_Inflammation_II	67	Simple mode	-0.109609	0.127578768373146	0.896184379505444	0.697911138899895	1.15078610628789	0.39336836449462
SERPINI1_Q99574_OID30604_v1_Inflammation_II	67	Weighted mode	-0.123158	0.0656068691898307	0.884124030770611	0.777441107718735	1.0054463213037	0.0649098163594814
SFTPA1_Q8IWL2_OID21165_v1_Oncology	14	MR Egger	0.0504754794789799	0.186470164620705	1.0517710730641	0.729784464038604	1.51582069041675	0.791229666796615
SFTPA1_Q8IWL2_OID21165_v1_Oncology	14	Weighted median	0.213552138640335	0.1256059193709	1.23806804776996	0.967891327171356	1.58366176850509	0.0890978715017154
SFTPA1_Q8IWL2_OID21165_v1_Oncology	14	Inverse variance weighted	0.246998474763615	0.0989432585616217	1.28018	1.0545031287548	1.55414765193081	0.0125473464956701
SFTPA1_Q8IWL2_OID21165_v1_Oncology	14	Simple mode	0.22072621037003	0.199404463369039	1.24698197308945	0.843574939162563	1.84330279269996	0.288387802949106
SFTPA1_Q8IWL2_OID21165_v1_Oncology	14	Weighted mode	0.195646182008083	0.123109981143627	1.21609655236536	0.955376876726797	1.54796589775306	0.136030297825502
SFTPD_P35247_OID20214_v1_Cardiometabolic	240	MR Egger	0.0657390176730299	0.0381051452181137	1.06794796524786	0.991092838946798	1.15076288684421	0.0857894259934495
SFTPD_P35247_OID20214_v1_Cardiometabolic	240	Weighted median	0.0837322639410319	0.0406337040700153	1.08733773531373	1.0040985802644	1.17747736514663	0.0393354522814015
SFTPD_P35247_OID20214_v1_Cardiometabolic	240	Inverse variance weighted	0.0898452300175493	0.0256352676378756	1.09400495147463	1.04039464284329	1.15037773606769	0.000457034512432573
SFTPD_P35247_OID20214_v1_Cardiometabolic	240	Simple mode	0.0918995737844237	0.0667942905026654	1.09625472383931	0.961734132937925	1.24959110671137	0.17015300559356
SFTPD_P35247_OID20214_v1_Cardiometabolic	240	Weighted mode	0.0777003662579268	0.0378489336141267	1.08079876636918	1.00352264636043	1.1640255231127	0.0411704522357191
SH3BP1_Q9Y3L3_OID31439_v1_Oncology_II	25	MR Egger	0.343438599801799	0.166875881214944	1.4097869586267	1.01649646109622	1.95524465138869	0.0510910271242616
SH3BP1_Q9Y3L3_OID31439_v1_Oncology_II	25	Weighted median	0.282189426339359	0.126215748493675	1.32602988118404	1.03541939716452	1.69820581940824	0.0253668190440614
SH3BP1_Q9Y3L3_OID31439_v1_Oncology_II	25	Inverse variance weighted	0.37836974648327	0.0910607828198321	1.45990263696059	1.22126915885349	1.74516460515987	3.25097086608925e-05
SH3BP1_Q9Y3L3_OID31439_v1_Oncology_II	25	Simple mode	0.26230407053974	0.18768474067808	1.29992175024903	0.899822262574317	1.87792259321983	0.17502619589611
SH3BP1_Q9Y3L3_OID31439_v1_Oncology_II	25	Weighted mode	0.294436254523663	0.12680225751476	1.34236939066611	1.04697371843779	1.7211087052749	0.029039192105275
SIGLEC10_Q96LC7_OID20537_v1_Inflammation	57	MR Egger	0.0480062985008025	0.0681774253788923	1.0491772635475	0.917941647458659	1.1991752780719	0.484317759342243
SIGLEC10_Q96LC7_OID20537_v1_Inflammation	57	Weighted median	0.0442430894621607	0.0786269874770816	1.04523640996487	0.895954358935289	1.2193915257185	0.573641924808154
SIGLEC10_Q96LC7_OID20537_v1_Inflammation	57	Inverse variance weighted	0.107093235958859	0.0520327290243727	1.11303802480918	1.00512216071175	1.23254037478774	0.0395719103308272
SIGLEC10_Q96LC7_OID20537_v1_Inflammation	57	Simple mode	0.127369517187179	0.180722805877332	1.13583665141032	0.797042575171173	1.61863988057342	0.483869185780383
SIGLEC10_Q96LC7_OID20537_v1_Inflammation	57	Weighted mode	0.0669060085363951	0.069010974153923	1.06919497825072	0.933928402255811	1.22405304170569	0.336465549502426
SIGLEC5_O15389_OID21082_v1_Neurology	93	MR Egger	-0.0462157	0.0377017991021298	0.954836010672606	0.886821820142274	1.02806650284147	0.223428807457227
SIGLEC5_O15389_OID21082_v1_Neurology	93	Weighted median	-0.0571833	0.0411262727377075	0.944420933524639	0.871280942362933	1.02370068747356	0.16439756956053
SIGLEC5_O15389_OID21082_v1_Neurology	93	Inverse variance weighted	-0.0516336	0.0259965453375088	0.949676773492192	0.902499791705312	0.999319869544112	0.0470143130271893
SIGLEC5_O15389_OID21082_v1_Neurology	93	Simple mode	-0.0756032	0.0652103040110188	0.927184019563941	0.815939215075175	1.05359589323764	0.249303429820167
SIGLEC5_O15389_OID21082_v1_Neurology	93	Weighted mode	-0.050412	0.0324132118485283	0.950837557195304	0.892309762888665	1.01320426804065	0.123309769530302
SIGLEC8_Q9NYZ4_OID30261_v1_Cardiometabolic_II	103	MR Egger	-0.0901322	0.0577694079026345	0.913810331037186	0.815984202547962	1.02336456821443	0.121838978447886
SIGLEC8_Q9NYZ4_OID30261_v1_Cardiometabolic_II	103	Weighted median	-0.0940197	0.0613865046938996	0.91026484969197	0.80707617092855	1.02664671121618	0.125620739682866
SIGLEC8_Q9NYZ4_OID30261_v1_Cardiometabolic_II	103	Inverse variance weighted	-0.146466	0.0402610224804377	0.863755173153752	0.798214820769656	0.934676956299168	0.000274861062819812
SIGLEC8_Q9NYZ4_OID30261_v1_Cardiometabolic_II	103	Simple mode	-0.115966	0.117275854261364	0.890505679796923	0.707635270693313	1.1206343134559	0.325086578905844
SIGLEC8_Q9NYZ4_OID30261_v1_Cardiometabolic_II	103	Weighted mode	-0.102301	0.0541098622492006	0.902757663222901	0.811917568893338	1.00376125573745	0.0615133308844919
SIRT1_Q96EB6_OID30439_v1_Inflammation_II	7	MR Egger	-0.226449	0.945956605953972	0.797359705309048	0.124864725262837	5.09177030031683	0.820309214277873
SIRT1_Q96EB6_OID30439_v1_Inflammation_II	7	Weighted median	-0.624565	0.285113156337116	0.535494345365787	0.306239827159938	0.936371328896327	0.0284817499286962
SIRT1_Q96EB6_OID30439_v1_Inflammation_II	7	Inverse variance weighted	-0.716614	0.236988322145448	0.488403120590989	0.306937462071132	0.777153777819845	0.00249590560222968
SIRT1_Q96EB6_OID30439_v1_Inflammation_II	7	Simple mode	-0.631237	0.381484525920002	0.53193321170347	0.251843602223631	1.12352642360124	0.149070339796926
SIRT1_Q96EB6_OID30439_v1_Inflammation_II	7	Weighted mode	-0.628855	0.387880964723048	0.533201830814542	0.249299087700198	1.14041409058776	0.156089118341776
SLITRK6_Q9H5Y7_OID20094_v1_Cardiometabolic	57	MR Egger	-0.118396	0.084136225539657	0.888343985633026	0.753291323768287	1.04760935365972	0.164995285480604
SLITRK6_Q9H5Y7_OID20094_v1_Cardiometabolic	57	Weighted median	-0.158241	0.0896642672293446	0.853644093701132	0.716066035491071	1.01765508010876	0.0775947120939651
SLITRK6_Q9H5Y7_OID20094_v1_Cardiometabolic	57	Inverse variance weighted	-0.132877	0.059604994185302	0.87557296335284	0.779032448242884	0.984077127831595	0.0257946443846181
SLITRK6_Q9H5Y7_OID20094_v1_Cardiometabolic	57	Simple mode	0.148430882723188	0.18524111064202	1.16001261809033	0.806830480484896	1.66779677599695	0.426353669558347
SLITRK6_Q9H5Y7_OID20094_v1_Cardiometabolic	57	Weighted mode	-0.124212	0.0820732772484084	0.883192995471577	0.751957736744281	1.03733205888315	0.135796183352008
SLMAP_Q14BN4_OID31441_v1_Oncology_II	4	MR Egger	-0.689147	1.96529717872416	0.502004192863227	0.0106613601208705	23.6375290577544	0.759335230246432
SLMAP_Q14BN4_OID31441_v1_Oncology_II	4	Weighted median	-1.26597	0.446194809775229	0.281966184900652	0.117594859748645	0.676091876782437	0.00455033589149413
SLMAP_Q14BN4_OID31441_v1_Oncology_II	4	Inverse variance weighted	-1.26651	0.364859465929823	0.281812062453513	0.137843068093731	0.576148221616047	0.000518060205867059
SLMAP_Q14BN4_OID31441_v1_Oncology_II	4	Simple mode	-1.38117	0.568478084340028	0.251284917969084	0.0824647048171998	0.765710738172183	0.0933643615907842
SLMAP_Q14BN4_OID31441_v1_Oncology_II	4	Weighted mode	-1.26033	0.535716244375143	0.283560440292618	0.0992281212779312	0.810319920032854	0.10006864148774
SMPD1_P17405_OID21028_v1_Neurology	108	MR Egger	0.0550539433316255	0.0906866978565926	1.05659760953348	0.884536071454827	1.26212886562748	0.545097023431364
SMPD1_P17405_OID21028_v1_Neurology	108	Weighted median	0.123756200224718	0.0891524186884916	1.13173991942404	0.950295262158254	1.34782871831749	0.165093866018511
SMPD1_P17405_OID21028_v1_Neurology	108	Inverse variance weighted	0.140279413098009	0.0498952811953432	1.15059524532901	1.04340005253413	1.26880328916835	0.00493146851494201
SMPD1_P17405_OID21028_v1_Neurology	108	Simple mode	0.182402656473175	0.158196334266819	1.20009732356147	0.880150680180505	1.63634888712922	0.251473727189932
SMPD1_P17405_OID21028_v1_Neurology	108	Weighted mode	0.131413366105096	0.0874193182208096	1.14043910276113	0.960858140351849	1.35358310710711	0.135719583861144
SNAP23_O00161_OID20218_v1_Cardiometabolic	10	MR Egger	-0.515277	0.728670092289319	0.597335049750347	0.14320609227502	2.49157808855657	0.49955202977934
SNAP23_O00161_OID20218_v1_Cardiometabolic	10	Weighted median	-0.61079	0.28828147269547	0.542921972384325	0.308565434393913	0.955273129268885	0.0341135666270157
SNAP23_O00161_OID20218_v1_Cardiometabolic	10	Inverse variance weighted	-0.615828	0.231082056578554	0.540193238892239	0.343437826215599	0.849669759910776	0.0076993600578206
SNAP23_O00161_OID20218_v1_Cardiometabolic	10	Simple mode	-0.634301	0.468408972198164	0.530306076427068	0.211742890297111	1.3281415697163	0.208705445009539
SNAP23_O00161_OID20218_v1_Cardiometabolic	10	Weighted mode	-0.634301	0.305097452673347	0.530306076427068	0.291623426677712	0.964341369619342	0.067373100219882
SOD2_P04179_OID21114_v1_Neurology	42	MR Egger	0.0537197773932695	0.207785996494049	1.05518887294544	0.70219735939081	1.58562766250477	0.797320418218027
SOD2_P04179_OID21114_v1_Neurology	42	Weighted median	0.158071257774069	0.143615013191405	1.17124965237724	0.883897504607228	1.55201903053611	0.271044790685316
SOD2_P04179_OID21114_v1_Neurology	42	Inverse variance weighted	0.19089001903949	0.0953505475274539	1.21032633190858	1.00401096837452	1.45903767573666	0.0452867360554606
SOD2_P04179_OID21114_v1_Neurology	42	Simple mode	0.0905867340845363	0.299424783933248	1.09481646142724	0.608787598876413	1.96886908738657	0.763773182661063
SOD2_P04179_OID21114_v1_Neurology	42	Weighted mode	0.0905867340845363	0.145539267517204	1.09481646142724	0.823106048781936	1.45621950657006	0.537111408591192
SPAG1_Q07617_OID30979_v1_Neurology_II	84	MR Egger	0.128316548145282	0.0565293854662198	1.13691283339094	1.0176733095552	1.27012350485439	0.0258374812715179
SPAG1_Q07617_OID30979_v1_Neurology_II	84	Weighted median	0.173362245043715	0.0469567124835369	1.18929684395004	1.08472563991224	1.30394906415594	0.000222533572735157
SPAG1_Q07617_OID30979_v1_Neurology_II	84	Inverse variance weighted	0.106696420770052	0.0315650266359955	1.11259644203438	1.04584897155942	1.18360382472991	0.000724304482940925
SPAG1_Q07617_OID30979_v1_Neurology_II	84	Simple mode	0.156991633169787	0.0872608594964278	1.16998582478721	0.986058444847264	1.3882207868673	0.075636355999804
SPAG1_Q07617_OID30979_v1_Neurology_II	84	Weighted mode	0.146955251514629	0.0456391964381713	1.15830212960423	1.05918784076648	1.26669111163021	0.00183103025502281
SPART_Q8N0X7_OID30656_v1_Inflammation_II	4	MR Egger	1.55087421935155	1.7705071973705	4.71559084191625	0.146706705273104	151.573146891747	0.473435241415082
SPART_Q8N0X7_OID30656_v1_Inflammation_II	4	Weighted median	-0.560396	0.474076426750836	0.570983002475391	0.225466061612103	1.4459896393485	0.237174314812317
SPART_Q8N0X7_OID30656_v1_Inflammation_II	4	Inverse variance weighted	-0.917848	0.393561212013149	0.399377387489286	0.184661944717811	0.863752939900576	0.0196921740896997
SPART_Q8N0X7_OID30656_v1_Inflammation_II	4	Simple mode	-1.62174	0.705676376219362	0.19755528540547	0.0495455661228355	0.787721159444956	0.105168465639579
SPART_Q8N0X7_OID30656_v1_Inflammation_II	4	Weighted mode	-0.388063	0.573702473425259	0.678369489994793	0.220353981934598	2.08839051110218	0.547256659718812
SPINK8_P0C7L1_OID30153_v1_Cardiometabolic_II	64	MR Egger	-0.38493	0.108757079957702	0.680498176632692	0.549858661394255	0.842176000694817	0.000766977691679444
SPINK8_P0C7L1_OID30153_v1_Cardiometabolic_II	64	Weighted median	-0.119327	0.101819676560538	0.887517428391316	0.726952830272428	1.08354648733281	0.241218904520905
SPINK8_P0C7L1_OID30153_v1_Cardiometabolic_II	64	Inverse variance weighted	-0.212461	0.0625890846854221	0.808592211627743	0.71524140798544	0.914126835227016	0.000687463949134127
SPINK8_P0C7L1_OID30153_v1_Cardiometabolic_II	64	Simple mode	-0.259584	0.181077007835756	0.771372172391468	0.54091385626458	1.1000180924352	0.156643121860342
SPINK8_P0C7L1_OID30153_v1_Cardiometabolic_II	64	Weighted mode	-0.145383	0.099383848301699	0.864690971670027	0.711645463051479	1.05065023991247	0.148481236455141
STAB2_Q8WWQ8_OID30401_v1_Cardiometabolic_II	120	MR Egger	-0.212029	0.07718694410506	0.808941517559533	0.695367313237648	0.941065773978764	0.00695900789246158
STAB2_Q8WWQ8_OID30401_v1_Cardiometabolic_II	120	Weighted median	-0.128285	0.0720452359698614	0.879602936489082	0.763766362850888	1.01300785621436	0.0749756988410997
STAB2_Q8WWQ8_OID30401_v1_Cardiometabolic_II	120	Inverse variance weighted	-0.0957426	0.0483881704732646	0.90869789655806	0.826476825701667	0.999098633537617	0.0478569778038606
STAB2_Q8WWQ8_OID30401_v1_Cardiometabolic_II	120	Simple mode	0.0798174097785669	0.142848189038862	1.08308928810625	0.818595640300459	1.4330425771385	0.577377583364197
STAB2_Q8WWQ8_OID30401_v1_Cardiometabolic_II	120	Weighted mode	-0.13598	0.0625323584033893	0.872859959060926	0.772175385146197	0.986672876120743	0.0316421337066899
STX7_O15400_OID30560_v1_Inflammation_II	73	MR Egger	0.0818981256695338	0.0630295298886702	1.08534523537812	0.959215272846014	1.22806038780315	0.198023423432206
STX7_O15400_OID30560_v1_Inflammation_II	73	Weighted median	0.0622085774129436	0.061225075558299	1.06418428638657	0.943845708405046	1.19986580995937	0.309599048920108
STX7_O15400_OID30560_v1_Inflammation_II	73	Inverse variance weighted	0.105008972502592	0.0413461451274941	1.11072057625424	1.0242601305052	1.20447937176473	0.0110930961670423
STX7_O15400_OID30560_v1_Inflammation_II	73	Simple mode	0.0018412865297317	0.111767897219869	1.00184298273868	0.804749852555335	1.24720664300305	0.986901652088278
STX7_O15400_OID30560_v1_Inflammation_II	73	Weighted mode	0.0765635738498474	0.05210070597041	1.07957082062885	0.974769925328924	1.19563922364548	0.146045175317943
SUSD4_Q5VX71_OID31398_v1_Oncology_II	36	MR Egger	-0.204544	0.147474872251757	0.815019137267831	0.610428301663915	1.08818053209879	0.174476260521673
SUSD4_Q5VX71_OID31398_v1_Oncology_II	36	Weighted median	-0.190475	0.0963053777242402	0.826566720492502	0.68438600977098	0.998285373563317	0.0479490911094888
SUSD4_Q5VX71_OID31398_v1_Oncology_II	36	Inverse variance weighted	-0.230958	0.0739639731945995	0.793772474700351	0.686651906109719	0.917604299916181	0.00179273449021773
SUSD4_Q5VX71_OID31398_v1_Oncology_II	36	Simple mode	-0.368132	0.164590579956537	0.692025696691388	0.501210189067827	0.955486491150309	0.0317800860125495
SUSD4_Q5VX71_OID31398_v1_Oncology_II	36	Weighted mode	-0.204695	0.0972449059178608	0.814896078008091	0.673481534239996	0.986004194906897	0.0425454944185584
SV2A_Q7L0J3_OID30965_v1_Neurology_II	7	MR Egger	0.277521681455184	0.295454949989829	1.31985473520483	0.739656033437685	2.35517111101802	0.390699668924928
SV2A_Q7L0J3_OID30965_v1_Neurology_II	7	Weighted median	0.444951828847086	0.235764320390878	1.56041502703132	0.982999921080768	2.4770043256037	0.0591235062218991
SV2A_Q7L0J3_OID30965_v1_Neurology_II	7	Inverse variance weighted	0.676436860458705	0.201663427546105	1.9668570457038	1.3246874468847	2.92033162036254	0.000795700046711264
SV2A_Q7L0J3_OID30965_v1_Neurology_II	7	Simple mode	0.729730206745583	0.346014947236411	2.07452084043791	1.05289225940419	4.08744264094651	0.0794874605567082
SV2A_Q7L0J3_OID30965_v1_Neurology_II	7	Weighted mode	0.475752179706359	0.225747831993815	1.6092241681333	1.03384662048824	2.50482264195182	0.0796531165382331
TAX1BP1_Q86VP1_OID31075_v1_Neurology_II	4	MR Egger	-1.78682	1.28506205157988	0.167491699681682	0.013493555145187	2.07902729565418	0.298908223602929
TAX1BP1_Q86VP1_OID31075_v1_Neurology_II	4	Weighted median	-0.671441	0.341385174534301	0.51097174375357	0.261700141598116	0.997676658943175	0.0492047101219093
TAX1BP1_Q86VP1_OID31075_v1_Neurology_II	4	Inverse variance weighted	-0.697402	0.305594856059824	0.497877083040711	0.273523436020192	0.906253567971515	0.0224826581189544
TAX1BP1_Q86VP1_OID31075_v1_Neurology_II	4	Simple mode	-0.424231	0.488639893266122	0.654272416269368	0.251084519258794	1.70489361890822	0.449168264234092
TAX1BP1_Q86VP1_OID31075_v1_Neurology_II	4	Weighted mode	-0.795472	0.376739486055718	0.451367981379743	0.215696761071096	0.944534603130508	0.125192670616513
TCN2_P20062_OID20341_v1_Cardiometabolic	127	MR Egger	0.22546727391784	0.0645687176038342	1.25290803067431	1.10396979448682	1.42193974977175	0.000663575089717682
TCN2_P20062_OID20341_v1_Cardiometabolic	127	Weighted median	0.131256603241071	0.0519825746043494	1.14026033827332	1.02980633162803	1.26256131770301	0.0115694474368559
TCN2_P20062_OID20341_v1_Cardiometabolic	127	Inverse variance weighted	0.158632615120981	0.0418706255927734	1.17190732655251	1.07957364382823	1.2721381166341	0.000151475852673619
TCN2_P20062_OID20341_v1_Cardiometabolic	127	Simple mode	0.160408190543508	0.0867875100099008	1.17398998481026	0.990351519101967	1.39168008313309	0.0669054785737249
TCN2_P20062_OID20341_v1_Cardiometabolic	127	Weighted mode	0.148027704006752	0.042047165371377	1.15954501996106	1.06781580654139	1.25915410230854	0.000600235459735731
TDGF1_P13385_OID20816_v1_Neurology	167	MR Egger	0.0364708073327297	0.0361506790621513	1.03714402657533	0.966199906503482	1.11329728415475	0.314521154016558
TDGF1_P13385_OID20816_v1_Neurology	167	Weighted median	0.0672778179963697	0.0349748369624513	1.06959258897133	0.998727947295772	1.14548542421391	0.0544039462148374
TDGF1_P13385_OID20816_v1_Neurology	167	Inverse variance weighted	0.073715569517407	0.0241099217910771	1.07650057236996	1.02681330001301	1.12859220103417	0.00223207591059651
TDGF1_P13385_OID20816_v1_Neurology	167	Simple mode	0.134148420313133	0.0601347808347853	1.14356253495926	1.01641756091436	1.28661223659499	0.0270345317729501
TDGF1_P13385_OID20816_v1_Neurology	167	Weighted mode	0.0484003901031489	0.0302293385040634	1.04959081698005	0.989209526012251	1.11365777837768	0.111254665805637
TF_P02787_OID30783_v1_Inflammation_II	81	MR Egger	0.185819535686128	0.0902361263665017	1.20420492475205	1.00899695952062	1.43717925719622	0.0427640652170935
TF_P02787_OID30783_v1_Inflammation_II	81	Weighted median	0.139879233277636	0.0816768045325109	1.15013489244852	0.979995495647557	1.34981260291762	0.0867871950146533
TF_P02787_OID30783_v1_Inflammation_II	81	Inverse variance weighted	0.129443158703729	0.0504183575774344	1.13819441317818	1.03109689052693	1.25641589465756	0.0102469805148262
TF_P02787_OID30783_v1_Inflammation_II	81	Simple mode	0.169548865428308	0.145179266645065	1.18477023992385	0.891363917993624	1.57475582427519	0.246332592018076
TF_P02787_OID30783_v1_Inflammation_II	81	Weighted mode	0.169548865428308	0.0852482708252453	1.18477023992385	1.00246528844923	1.40022855412844	0.0501327776044594
TG_P01266_OID31359_v1_Oncology_II	47	MR Egger	0.388669880772642	0.405001411043355	1.47501753930105	0.666888185618721	3.26243107639878	0.342346826061365
TG_P01266_OID31359_v1_Oncology_II	47	Weighted median	0.598933886108009	0.16336674540922	1.82017724936571	1.32145719736598	2.50711504368989	0.000246188931127919
TG_P01266_OID31359_v1_Oncology_II	47	Inverse variance weighted	0.646693358665781	0.147640112459991	1.90921728314211	1.42949143083643	2.5499352816097	1.18569921993432e-05
TG_P01266_OID31359_v1_Oncology_II	47	Simple mode	0.510175953649354	0.353348968771914	1.66558423478883	0.833277944882775	3.32922629263561	0.155563333484003
TG_P01266_OID31359_v1_Oncology_II	47	Weighted mode	0.44885845410435	0.283276831241923	1.56652290661801	0.899097195587029	2.72939792160812	0.1199265340757
TGFBR3_Q03167_OID20255_v1_Cardiometabolic	52	MR Egger	0.405857834143564	0.157325537515336	1.50058920474355	1.10241119970917	2.0425844385352	0.0128738189486988
TGFBR3_Q03167_OID20255_v1_Cardiometabolic	52	Weighted median	0.202908832504441	0.124038464466051	1.22496078654964	0.960591001047591	1.56208930434272	0.101870123179056
TGFBR3_Q03167_OID20255_v1_Cardiometabolic	52	Inverse variance weighted	0.218695793324488	0.0791549114686137	1.24445264829684	1.06561507412899	1.45330375991429	0.00572932241630681
TGFBR3_Q03167_OID20255_v1_Cardiometabolic	52	Simple mode	0.0690936197883616	0.252912351593342	1.07153652147503	0.652715067104866	1.75909914558527	0.78580892825402
TGFBR3_Q03167_OID20255_v1_Cardiometabolic	52	Weighted mode	0.326237639597901	0.179645426950921	1.38574463754606	0.974464297711018	1.97060908747334	0.0752493626689621
TGOLN2_O43493_OID30691_v1_Inflammation_II	107	MR Egger	0.0888628015617429	0.0512817978244652	1.09293069765468	0.98841807077942	1.20849420421261	0.0860612871499746
TGOLN2_O43493_OID30691_v1_Inflammation_II	107	Weighted median	0.110649498477511	0.0527481564262874	1.11700332686708	1.00728955225346	1.2386671036554	0.0359321731324782
TGOLN2_O43493_OID30691_v1_Inflammation_II	107	Inverse variance weighted	0.087761242077629	0.0332902934754056	1.09172743233503	1.02276758024018	1.16533688546615	0.00838301281619948
TGOLN2_O43493_OID30691_v1_Inflammation_II	107	Simple mode	0.0712951050031059	0.0878257312308891	1.07389809181141	0.904074664787248	1.27562153493991	0.418737524128915
TGOLN2_O43493_OID30691_v1_Inflammation_II	107	Weighted mode	0.0916973627906481	0.0482725827368616	1.0960330714932	0.997087350644082	1.20479764689706	0.0602069740504689
THBS2_P35442_OID21104_v1_Neurology	69	MR Egger	0.215901910901077	0.0871810991108686	1.24098064635706	1.04605605768917	1.47222794926963	0.015800281684911
THBS2_P35442_OID21104_v1_Neurology	69	Weighted median	0.104081572169513	0.0748985857774219	1.10969097112373	0.958179972467587	1.28515945519326	0.164640245261236
THBS2_P35442_OID21104_v1_Neurology	69	Inverse variance weighted	0.110098993824115	0.0511682946205264	1.11638858056366	1.00985740363701	1.23415787053133	0.0314207217045556
THBS2_P35442_OID21104_v1_Neurology	69	Simple mode	0.0203310855682806	0.133771194350582	1.02053916988939	0.78516573557834	1.32647178816504	0.879649562575896
THBS2_P35442_OID21104_v1_Neurology	69	Weighted mode	0.0682110756622434	0.0728766816896873	1.07059126039074	0.928089394598084	1.23497332638025	0.352595997800683
TLR1_Q15399_OID30532_v1_Inflammation_II	44	MR Egger	0.291558506209373	0.124540113284919	1.33851194245961	1.0486041346533	1.70857062345968	0.0240490742497468
TLR1_Q15399_OID30532_v1_Inflammation_II	44	Weighted median	0.424033374979477	0.102225817158503	1.52811259365945	1.25065920130071	1.86711783391672	3.3538257929176e-05
TLR1_Q15399_OID30532_v1_Inflammation_II	44	Inverse variance weighted	0.282781516756527	0.0747941547311963	1.3268152432493	1.14589383396664	1.53630173890085	0.000156327097154098
TLR1_Q15399_OID30532_v1_Inflammation_II	44	Simple mode	0.384195988059654	0.213130398924744	1.46843320885694	0.967016622578898	2.22984387085647	0.0784573650078373
TLR1_Q15399_OID30532_v1_Inflammation_II	44	Weighted mode	0.406162367679373	0.128593094223842	1.50104625406976	1.16663076092148	1.93132217350172	0.00289939918449544
TMEM132A_Q24JP5_OID30287_v1_Cardiometabolic_II	67	MR Egger	-0.147276	0.0808752552423676	0.863055712054136	0.736540147034598	1.01130286666408	0.0732055604794962
TMEM132A_Q24JP5_OID30287_v1_Cardiometabolic_II	67	Weighted median	-0.169956	0.0614160706903374	0.843701770667719	0.748015411453609	0.951628358090308	0.00565241076864697
TMEM132A_Q24JP5_OID30287_v1_Cardiometabolic_II	67	Inverse variance weighted	-0.118433	0.0433796702485547	0.888311520499357	0.815905336593737	0.967143272706396	0.00633064906026545
TMEM132A_Q24JP5_OID30287_v1_Cardiometabolic_II	67	Simple mode	-0.0209812	0.11846699503812	0.979237350912393	0.776330821009206	1.23517676159678	0.859967469475031
TMEM132A_Q24JP5_OID30287_v1_Cardiometabolic_II	67	Weighted mode	-0.149976	0.0591597653607561	0.860728367110874	0.766493201849347	0.966549109844506	0.0136189834089484
TMPRSS5_Q9H3S3_OID20947_v1_Neurology	131	MR Egger	-0.113712	0.0460735220781537	0.892515219143184	0.815449473540406	0.976864223044636	0.0148946109191638
TMPRSS5_Q9H3S3_OID20947_v1_Neurology	131	Weighted median	-0.0699491	0.0467773476972235	0.932441299097123	0.850753645164495	1.02197243726628	0.134819929387169
TMPRSS5_Q9H3S3_OID20947_v1_Neurology	131	Inverse variance weighted	-0.109767	0.0340903252222846	0.896043005784004	0.838128451303819	0.957959447582798	0.00128242781091012
TMPRSS5_Q9H3S3_OID20947_v1_Neurology	131	Simple mode	-0.0370773	0.0828451492320542	0.963601604800728	0.819178037035626	1.13348748476536	0.655222889965297
TMPRSS5_Q9H3S3_OID20947_v1_Neurology	131	Weighted mode	-0.0836613	0.0437414364195858	0.919742728994969	0.84417580541288	1.00207	0.0579947171769432
TNFRSF10A_O00220_OID20967_v1_Neurology	69	MR Egger	0.0714806007298547	0.0742482503530354	1.07409731379525	0.92862900381996	1.24235301154329	0.339147694571815
TNFRSF10A_O00220_OID20967_v1_Neurology	69	Weighted median	0.158897424721637	0.0706383425337402	1.17221769995678	1.02065673030878	1.34628450025138	0.0244838759400591
TNFRSF10A_O00220_OID20967_v1_Neurology	69	Inverse variance weighted	0.143399947806946	0.04636490031531	1.1541913256566	1.05392863931137	1.26399223489302	0.00198240480159324
TNFRSF10A_O00220_OID20967_v1_Neurology	69	Simple mode	0.0796861238863689	0.137032831330269	1.08294710309638	0.82787075852248	1.41661535454872	0.562818743452902
TNFRSF10A_O00220_OID20967_v1_Neurology	69	Weighted mode	0.151234123389596	0.0622259521055352	1.1632689746781	1.02970387124905	1.31415909489316	0.0177257523093112
TNFRSF11A_Q9Y6Q6_OID20646_v1_Inflammation	99	MR Egger	-0.166923	0.0583132312371736	0.846264520189982	0.754864338599039	0.948731581970763	0.00514959928572268
TNFRSF11A_Q9Y6Q6_OID20646_v1_Inflammation	99	Weighted median	-0.180206	0.0517006751013477	0.83509803960302	0.754621129041398	0.924157446578135	0.000491095886622808
TNFRSF11A_Q9Y6Q6_OID20646_v1_Inflammation	99	Inverse variance weighted	-0.111982	0.036974344147074	0.894060101377913	0.831559859548482	0.961257876624672	0.0024565060773281
TNFRSF11A_Q9Y6Q6_OID20646_v1_Inflammation	99	Simple mode	-0.0644043	0.089852141051334	0.937625810834356	0.786223222816457	1.11818391473285	0.475213883472351
TNFRSF11A_Q9Y6Q6_OID20646_v1_Inflammation	99	Weighted mode	-0.178806	0.051904831808112	0.836268303699204	0.755376294720594	0.925822905298643	0.000842403345277317
TNFRSF17_Q02223_OID30589_v1_Inflammation_II	51	MR Egger	-0.351078	0.206348760161992	0.703929018017041	0.469765650537799	1.05481544220859	0.0952098225567586
TNFRSF17_Q02223_OID30589_v1_Inflammation_II	51	Weighted median	-0.11025	0.137207148035821	0.895609790494859	0.684424819715352	1.17195764052484	0.421666767735685
TNFRSF17_Q02223_OID30589_v1_Inflammation_II	51	Inverse variance weighted	-0.189061	0.0925967089523579	0.827735790648579	0.690353966165857	0.99245687386407	0.0411742587020551
TNFRSF17_Q02223_OID30589_v1_Inflammation_II	51	Simple mode	0.092212411908922	0.262014740955303	1.09659772776064	0.65616927618303	1.83264687966643	0.72636527379607
TNFRSF17_Q02223_OID30589_v1_Inflammation_II	51	Weighted mode	-0.0277478	0.174934960555671	0.972633617156862	0.690305973323041	1.37043020020477	0.874608855421826
TNFSF11_O14788_OID20592_v1_Inflammation	56	MR Egger	0.0326186159007311	0.111630365660373	1.03315643465724	0.830126731914556	1.28584248336617	0.771251919438391
TNFSF11_O14788_OID20592_v1_Inflammation	56	Weighted median	0.0933390429116157	0.0973354749689044	1.09783388497399	0.907158140926295	1.32858780032158	0.337588131047401
TNFSF11_O14788_OID20592_v1_Inflammation	56	Inverse variance weighted	0.193716321915649	0.0694900291804925	1.21375191929499	1.05920207446777	1.39085237567394	0.00530861107066922
TNFSF11_O14788_OID20592_v1_Inflammation	56	Simple mode	0.359337715262823	0.230266809718839	1.43238045664059	0.912118619808502	2.24939358544907	0.124371413698697
TNFSF11_O14788_OID20592_v1_Inflammation	56	Weighted mode	0.100560396088291	0.0969104570557486	1.10579042510347	0.914494249102747	1.33710240982952	0.303967584169811
TNFSF12_O43508_OID20624_v1_Inflammation	77	MR Egger	0.152058034824146	0.101555358370484	1.16422780022722	0.954096492393598	1.42063866875925	0.13851417371959
TNFSF12_O43508_OID20624_v1_Inflammation	77	Weighted median	0.0938103470967319	0.0962309994818414	1.09835142062732	0.909552633502362	1.32633978371183	0.329636953571006
TNFSF12_O43508_OID20624_v1_Inflammation	77	Inverse variance weighted	0.122391356667888	0.0578704348781836	1.1302	1.00900561301721	1.26594313927579	0.0344367419208815
TNFSF12_O43508_OID20624_v1_Inflammation	77	Simple mode	0.0956581223631612	0.17343188992275	1.10038280340766	0.783277388588696	1.54586654954636	0.582867854978932
TNFSF12_O43508_OID20624_v1_Inflammation	77	Weighted mode	0.130037363579301	0.0893892148943536	1.13887093482417	0.955839279622623	1.35695093708573	0.14986129644229
TNFSF13B_Q9Y275_OID20272_v1_Cardiometabolic	82	MR Egger	0.149472504819915	0.1347845779517	1.16122154237763	0.891628896782926	1.51232813937184	0.270764360323087
TNFSF13B_Q9Y275_OID20272_v1_Cardiometabolic	82	Weighted median	0.0737086560328521	0.107271573852653	1.0764931300256	0.872368259120276	1.32838104421741	0.492005865412232
TNFSF13B_Q9Y275_OID20272_v1_Cardiometabolic	82	Inverse variance weighted	0.221738348349747	0.074612890808422	1.24824472983867	1.07842008127755	1.44481258520724	0.00296010893662075
TNFSF13B_Q9Y275_OID20272_v1_Cardiometabolic	82	Simple mode	0.0225184707122081	0.215213854682889	1.02277392535281	0.670788975202028	1.55945690977783	0.916925690193794
TNFSF13B_Q9Y275_OID20272_v1_Cardiometabolic	82	Weighted mode	0.0688995291745687	0.125593461660188	1.07132856647558	0.837558928241003	1.37034524813323	0.584794650377162
TNXB_P22105_OID21107_v1_Neurology	163	MR Egger	-0.0183058	0.0593667375155285	0.981860768983919	0.874009031966356	1.1030212897237	0.758214231581459
TNXB_P22105_OID21107_v1_Neurology	163	Weighted median	0.053146871458141	0.049870575515569	1.05458452211207	0.956380477058388	1.16287245605333	0.286561099001703
TNXB_P22105_OID21107_v1_Neurology	163	Inverse variance weighted	0.0780639534339759	0.0358810102215822	1.08119180238762	1.0077671826715	1.15996604538296	0.0295826229609614
TNXB_P22105_OID21107_v1_Neurology	163	Simple mode	-0.00443092	0.101433019861076	0.995578884373218	0.816082654729211	1.21455505672855	0.96521073716961
TNXB_P22105_OID21107_v1_Neurology	163	Weighted mode	0.0545315548181731	0.0587381335800413	1.05604579922115	0.941204174353822	1.1848998978551	0.354589503865594
TPMT_P51580_OID21270_v1_Oncology	48	MR Egger	-0.0856596	0.0879146112531541	0.917906670015326	0.772616711915668	1.09051828916508	0.334979191086347
TPMT_P51580_OID21270_v1_Oncology	48	Weighted median	-0.11937	0.0841782992993837	0.887479160500263	0.752495918976009	1.04667578980898	0.156171999941318
TPMT_P51580_OID21270_v1_Oncology	48	Inverse variance weighted	-0.116743	0.0584546830973936	0.889813565658783	0.793489879097117	0.997830221264224	0.0458078789026297
TPMT_P51580_OID21270_v1_Oncology	48	Simple mode	-0.232937	0.139803661507524	0.792203395749123	0.602328510577665	1.04193344531301	0.102330977171299
TPMT_P51580_OID21270_v1_Oncology	48	Weighted mode	-0.0678947	0.0812173634790821	0.934358876223024	0.796856464463364	1.09558816237336	0.407405904602815
TPP1_O14773_OID20750_v1_Inflammation	51	MR Egger	-0.0194396	0.161442357958761	0.980748174494234	0.714718459457334	1.34579843160074	0.9046493802308
TPP1_O14773_OID20750_v1_Inflammation	51	Weighted median	0.355384555019375	0.112822518532901	1.42672920467776	1.14368146979674	1.77982793044833	0.00163302059752754
TPP1_O14773_OID20750_v1_Inflammation	51	Inverse variance weighted	0.220935132670607	0.0791356299219429	1.2472425226484	1.06804438431686	1.45650680172561	0.00524069810550495
TPP1_O14773_OID20750_v1_Inflammation	51	Simple mode	0.394200720712292	0.196999716285252	1.48319822740329	1.0081140184492	2.18217080758023	0.0508332021071208
TPP1_O14773_OID20750_v1_Inflammation	51	Weighted mode	0.385531504589673	0.154472888278442	1.47039563581573	1.08628611403139	1.99032584316316	0.015911680243292
TREH_O43280_OID30388_v1_Cardiometabolic_II	111	MR Egger	0.0495630082213149	0.0398048500565325	1.05081179991144	0.97194651875788	1.13607633498627	0.21574685546506
TREH_O43280_OID30388_v1_Cardiometabolic_II	111	Weighted median	0.00963020153590077	0.042829666527926	1.00967672113784	0.928378331139732	1.09809443737892	0.822096857204435
TREH_O43280_OID30388_v1_Cardiometabolic_II	111	Inverse variance weighted	0.0661377264651318	0.0303598117158421	1.06837385038754	1.00665453920835	1.13387725355069	0.0293715840888819
TREH_O43280_OID30388_v1_Cardiometabolic_II	111	Simple mode	0.030682909901302	0.0863900729251345	1.03115848189675	0.870539945325325	1.22141186110679	0.723144522967453
TREH_O43280_OID30388_v1_Cardiometabolic_II	111	Weighted mode	0.030682909901302	0.0387466876536393	1.03115848189675	0.95574838335577	1.11251855959646	0.430132260374781
TRIM40_Q6P9F5_OID30885_v1_Neurology_II	45	MR Egger	-0.0550974	0.148065356887132	0.946392936313679	0.708004004247548	1.26504876318647	0.711634440460099
TRIM40_Q6P9F5_OID30885_v1_Neurology_II	45	Weighted median	-0.107132	0.11990744597082	0.898406644700639	0.710240897998031	1.13642357335004	0.371611005383549
TRIM40_Q6P9F5_OID30885_v1_Neurology_II	45	Inverse variance weighted	-0.229426	0.0817381383039733	0.794989481532307	0.677305300904579	0.933121702875976	0.00500290982568992
TRIM40_Q6P9F5_OID30885_v1_Neurology_II	45	Simple mode	-0.61689	0.29298643580312	0.539620015790305	0.303873593241426	0.958259512896141	0.0409880158867005
TRIM40_Q6P9F5_OID30885_v1_Neurology_II	45	Weighted mode	-0.0788891	0.138443938121581	0.924142387475233	0.704519521057906	1.21222922403342	0.571693047638551
TSC1_Q92574_OID30478_v1_Inflammation_II	7	MR Egger	-0.409208	0.617612791213848	0.664175762647234	0.197952231483039	2.2284641116856	0.536924989367714
TSC1_Q92574_OID30478_v1_Inflammation_II	7	Weighted median	-0.747851	0.305852369882503	0.473382867916217	0.259935588038335	0.862103343861996	0.0144797356153375
TSC1_Q92574_OID30478_v1_Inflammation_II	7	Inverse variance weighted	-0.535904	0.247104127449451	0.585140021733697	0.360512662949431	0.949727652375247	0.0301025819428187
TSC1_Q92574_OID30478_v1_Inflammation_II	7	Simple mode	-0.859941	0.474499536495854	0.423186953922073	0.166966795168489	1.07259169578671	0.119890413590525
TSC1_Q92574_OID30478_v1_Inflammation_II	7	Weighted mode	-0.849304	0.455984345555742	0.427712348555041	0.174988729593777	1.04542648850098	0.111824124468509
TSHB_P01222_OID20129_v1_Cardiometabolic	52	MR Egger	-0.177964	0.456447145907912	0.836972921495399	0.342117864978305	2.04760915177863	0.698274827570991
TSHB_P01222_OID20129_v1_Cardiometabolic	52	Weighted median	-0.116567	0.15485313089423	0.889970822008683	0.656995087558121	1.2055616229501	0.451596638351244
TSHB_P01222_OID20129_v1_Cardiometabolic	52	Inverse variance weighted	-0.364001	0.159484684531638	0.694890400597907	0.508346933512271	0.949888033172259	0.0224682138773331
TSHB_P01222_OID20129_v1_Cardiometabolic	52	Simple mode	-0.163151	0.3164287299723	0.849462742292882	0.456872231576501	1.57940645255197	0.60836062426467
TSHB_P01222_OID20129_v1_Cardiometabolic	52	Weighted mode	-0.144623	0.211634959572773	0.865348482968772	0.571536172687297	1.31020228073308	0.497472008580147
TXNDC15_Q96J42_OID21495_v1_Oncology	159	MR Egger	-0.0468415	0.0484116416216464	0.954238667111903	0.86785703749716	1.04921824041149	0.334749239874614
TXNDC15_Q96J42_OID21495_v1_Oncology	159	Weighted median	-0.112928	0.0464655356575134	0.893215211005857	0.815462225005284	0.978381816726175	0.0150840560277686
TXNDC15_Q96J42_OID21495_v1_Oncology	159	Inverse variance weighted	-0.0766622	0.0374251886009104	0.926202679683932	0.8606945827123	0.996696646039476	0.0405196825302847
TXNDC15_Q96J42_OID21495_v1_Oncology	159	Simple mode	-0.089839	0.102474632622811	0.914078323504948	0.747747968698438	1.11740749086352	0.381983215109746
TXNDC15_Q96J42_OID21495_v1_Oncology	159	Weighted mode	-0.0710451	0.0359551341162356	0.931419926848266	0.868040317195326	0.999427172845032	0.0499033387660408
TYRO3_Q06418_OID20161_v1_Cardiometabolic	154	MR Egger	0.0140753329684394	0.0465658574625115	1.0141748568633	0.925710481992692	1.11109322007419	0.7628615647288
TYRO3_Q06418_OID20161_v1_Cardiometabolic	154	Weighted median	0.101887786430255	0.0464177001993909	1.10725921524726	1.01096881517609	1.21272085878971	0.0281621536261597
TYRO3_Q06418_OID20161_v1_Cardiometabolic	154	Inverse variance weighted	0.0913149749169733	0.0317042990478417	1.09561404185854	1.02960429496829	1.16585579001939	0.00397412922929817
TYRO3_Q06418_OID20161_v1_Cardiometabolic	154	Simple mode	0.054126007373875	0.0885207498854904	1.05561760937773	0.88747523486294	1.25561648759749	0.541809188995369
TYRO3_Q06418_OID20161_v1_Cardiometabolic	154	Weighted mode	0.0682479469263146	0.0403400584366416	1.07063073517155	0.989239742625878	1.15871827798924	0.0927167970032828
UNC79_Q9P2D8_OID31181_v1_Oncology_II	5	MR Egger	-1.42822	0.86883422298767	0.239735971318995	0.0436683298164053	1.3161331378117	0.198757060595262
UNC79_Q9P2D8_OID31181_v1_Oncology_II	5	Weighted median	-1.26984	0.282488603486791	0.280875718164236	0.161456317233574	0.488622374187724	6.95043317749108e-06
UNC79_Q9P2D8_OID31181_v1_Oncology_II	5	Inverse variance weighted	-1.15751	0.294412928418451	0.314267563307702	0.176477854070269	0.559640198866173	8.43863485865753e-05
UNC79_Q9P2D8_OID31181_v1_Oncology_II	5	Simple mode	-1.18821	0.506906232456521	0.304765530438349	0.112844020172172	0.823101023888135	0.0790277248577476
UNC79_Q9P2D8_OID31181_v1_Oncology_II	5	Weighted mode	-1.39608	0.299825849629121	0.247565614988766	0.137554058513211	0.445561071677718	0.00961607408401092
USP28_Q96RU2_OID31084_v1_Neurology_II	3	MR Egger	-1.8667	1.16417522145271	0.154632871482124	0.0157883180443573	1.51449475970956	0.354998642818342
USP28_Q96RU2_OID31084_v1_Neurology_II	3	Weighted median	-0.996945	0.397873255182862	0.369004992204041	0.169182597934996	0.804838594119606	0.0122214394127289
USP28_Q96RU2_OID31084_v1_Neurology_II	3	Inverse variance weighted	-0.998816	0.347446536626543	0.368315277918653	0.186409169393881	0.72773321392605	0.00404369474726339
USP28_Q96RU2_OID31084_v1_Neurology_II	3	Simple mode	-0.816646	0.497172697447613	0.441911421434928	0.166775895985727	1.1709468160276	0.242178699679606
USP28_Q96RU2_OID31084_v1_Neurology_II	3	Weighted mode	-0.999135	0.486929097040815	0.368197844080858	0.141774729123248	0.956232843639839	0.176619017468477
VMO1_Q7Z5L0_OID21381_v1_Oncology	125	MR Egger	-0.0649407	0.0375122949414456	0.937123035596697	0.870693903118059	1.00862034372933	0.0859263919803047
VMO1_Q7Z5L0_OID21381_v1_Oncology	125	Weighted median	-0.0174224	0.0423111258080199	0.982728472557963	0.904518766158607	1.06770062370023	0.68050856732684
VMO1_Q7Z5L0_OID21381_v1_Oncology	125	Inverse variance weighted	-0.0628934	0.0268507588995123	0.939043537088456	0.890901931776376	0.989786566956214	0.0191635758887052
VMO1_Q7Z5L0_OID21381_v1_Oncology	125	Simple mode	-0.175921	0.105699671899644	0.838684149621241	0.681749861206758	1.03174366853679	0.0985677985498476
VMO1_Q7Z5L0_OID21381_v1_Oncology	125	Weighted mode	-0.0302829	0.039036486392807	0.970170999334885	0.898710385383651	1.04731377678321	0.439367894309357
VSIG10_Q8N0Z9_OID31400_v1_Oncology_II	78	MR Egger	0.0520013057238906	0.0523362726875816	1.05337711793214	0.950679973595055	1.1671681148252	0.32357078100677
VSIG10_Q8N0Z9_OID31400_v1_Oncology_II	78	Weighted median	0.110543741235331	0.0523558285207587	1.11688520192212	1.00795781374975	1.23758409058013	0.0347385275687964
VSIG10_Q8N0Z9_OID31400_v1_Oncology_II	78	Inverse variance weighted	0.113123148573773	0.0354827773763698	1.11976982251456	1.04454032150898	1.20041747512712	0.00143203936448594
VSIG10_Q8N0Z9_OID31400_v1_Oncology_II	78	Simple mode	0.262749834221611	0.109857429119437	1.3005013373244	1.04857203629886	1.61295902411468	0.0192090909630686
VSIG10_Q8N0Z9_OID31400_v1_Oncology_II	78	Weighted mode	0.123114245381329	0.0493870356883361	1.13101362664984	1.02666496970595	1.24596812145446	0.0148194012528481
VWC2L_B2RUY7_OID31002_v1_Neurology_II	5	MR Egger	0.80360146454397	1.42326616420622	2.23357058582159	0.137243272347256	36.3503250580074	0.611795979849994
VWC2L_B2RUY7_OID31002_v1_Neurology_II	5	Weighted median	0.512503791754715	0.307929024762849	1.66946596150107	0.912983841509906	3.05275566761546	0.0960411312019948
VWC2L_B2RUY7_OID31002_v1_Neurology_II	5	Inverse variance weighted	0.552828021959399	0.262886676913805	1.73816163302738	1.03828481485006	2.90980453466875	0.0354733048776869
VWC2L_B2RUY7_OID31002_v1_Neurology_II	5	Simple mode	0.246570964567359	0.432590858346506	1.27962998838409	0.548094743273896	2.98753623760556	0.599174435556966
VWC2L_B2RUY7_OID31002_v1_Neurology_II	5	Weighted mode	0.364290093485915	0.396301456348924	1.43949174077127	0.662019173179342	3.13002486287109	0.40999415509592
WASL_O00401_OID30467_v1_Inflammation_II	14	MR Egger	-0.571486	0.619862001120652	0.564685500045708	0.167559651610272	1.90302206347106	0.37471544737356
WASL_O00401_OID30467_v1_Inflammation_II	14	Weighted median	-0.766085	0.275213254805479	0.464829293545109	0.271036161192161	0.797186143676443	0.00537584232537335
WASL_O00401_OID30467_v1_Inflammation_II	14	Inverse variance weighted	-0.687989	0.190866375401358	0.502585548800246	0.345733337146271	0.730598431576702	0.000312681546700861
WASL_O00401_OID30467_v1_Inflammation_II	14	Simple mode	-1.0841	0.511187656087415	0.338206591861697	0.124179626892152	0.9211148530672	0.0537476413274691
WASL_O00401_OID30467_v1_Inflammation_II	14	Weighted mode	-0.883908	0.45204293566535	0.413165114000362	0.170347956974544	1.00209837827666	0.0723834412917488
XCL1_P47992_OID21398_v1_Oncology	109	MR Egger	-0.146657	0.0565514154138331	0.863590354347296	0.772983540422619	0.964817827445507	0.0108346826795019
XCL1_P47992_OID21398_v1_Oncology	109	Weighted median	-0.066766	0.0589846753889219	0.935414021597752	0.833287958883172	1.05005644504261	0.257667284728166
XCL1_P47992_OID21398_v1_Oncology	109	Inverse variance weighted	-0.109112	0.0386581171008387	0.896629708221422	0.831202174570595	0.967207327243286	0.00476516754672788
XCL1_P47992_OID21398_v1_Oncology	109	Simple mode	-0.101793	0.101901060888269	0.903217	0.739693730074992	1.10288900151676	0.320056989634243
XCL1_P47992_OID21398_v1_Oncology	109	Weighted mode	-0.0770514	0.0535656456520191	0.925842225874196	0.833567908040674	1.02833112808592	0.1531983569289
ZFYVE19_Q96K21_OID31452_v1_Oncology_II	49	MR Egger	-0.17017	0.162667365355398	0.843521381567747	0.61324051374445	1.16027611551195	0.300854814170155
ZFYVE19_Q96K21_OID31452_v1_Oncology_II	49	Weighted median	-0.307411	0.107467968894516	0.735347950280494	0.595681763083225	0.907760890954414	0.004229814348459
ZFYVE19_Q96K21_OID31452_v1_Oncology_II	49	Inverse variance weighted	-0.254156	0.086719765418501	0.775570934501253	0.654341055808552	0.919261093436779	0.00338121209328432
ZFYVE19_Q96K21_OID31452_v1_Oncology_II	49	Simple mode	-0.206367	0.233361703096306	0.813534317328143	0.514913627235535	1.28533806538359	0.380930039027684
ZFYVE19_Q96K21_OID31452_v1_Oncology_II	49	Weighted mode	-0.262288	0.102544515039751	0.769289391634775	0.62921937970504	0.940540274457573	0.0137467652627199
ZP3_P21754_OID30265_v1_Cardiometabolic_II	165	MR Egger	-0.0544232	0.0261558694787006	0.947031199396046	0.899704642059136	0.996847243754204	0.0390228915860659
ZP3_P21754_OID30265_v1_Cardiometabolic_II	165	Weighted median	-0.0753411	0.0312762727831643	0.927427048901124	0.872281892825945	0.986058449805602	0.0160010634147915
ZP3_P21754_OID30265_v1_Cardiometabolic_II	165	Inverse variance weighted	-0.0486998	0.0193218315051304	0.952467011088899	0.917070804640077	0.989229405867594	0.011720322708345
ZP3_P21754_OID30265_v1_Cardiometabolic_II	165	Simple mode	-0.0384773	0.0533825916041578	0.962253530047882	0.866661159716545	1.06838969960584	0.472068591016214
ZP3_P21754_OID30265_v1_Cardiometabolic_II	165	Weighted mode	-0.0622072	0.0268177559136938	0.939688139983375	0.891571158222798	0.990401935147341	0.0215938211553524
